# Supplementary material for: A novel mouse model for LAMA2-related muscular dystrophy with analysis of molecular pathogenesis and clinical phenotype
Source: eLife journal article supplement (doi:10.7554/elife.94288), 2024-03-04
Supplement: fig4-data2 [file Figure 4–source data 2.pdf › Figure 4–source data 2/Figure 4–source data 2.pdf]

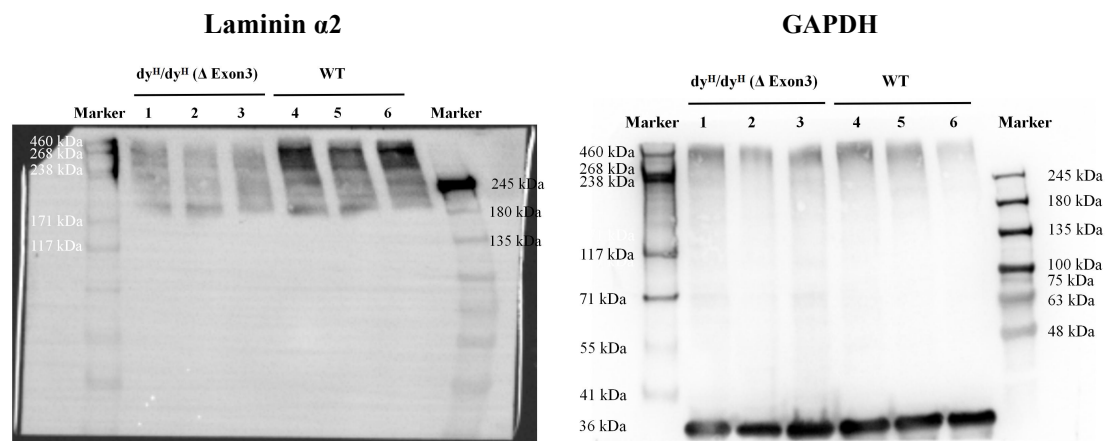

**Figure 4, Source Data 2.** Original membranes corresponding to Figure 4, panel B. The left membrane correspond to laminin  $\alpha 2$  chain, The right membrane correspond to GAPDH. Lanes with our internal codes correspond to homozygote knockout (KO), dy<sup>H</sup>/dy<sup>H</sup> (ΔExon 3) (lanes 1, 2, 3), and dy<sup>H</sup>/+ (Het) (lanes 4, 5, 6. Rainbow molecular weight markers were employed.
