# Supplementary material for: A novel mouse model for LAMA2-related muscular dystrophy with analysis of molecular pathogenesis and clinical phenotype
Source: eLife journal article supplement (doi:10.7554/elife.94288), 2024-03-04
Supplement: fig8-data2 [file Figure 8–source data 2.pdf › Figure 8–source data 2/Figure 8–source data 2.pdf]

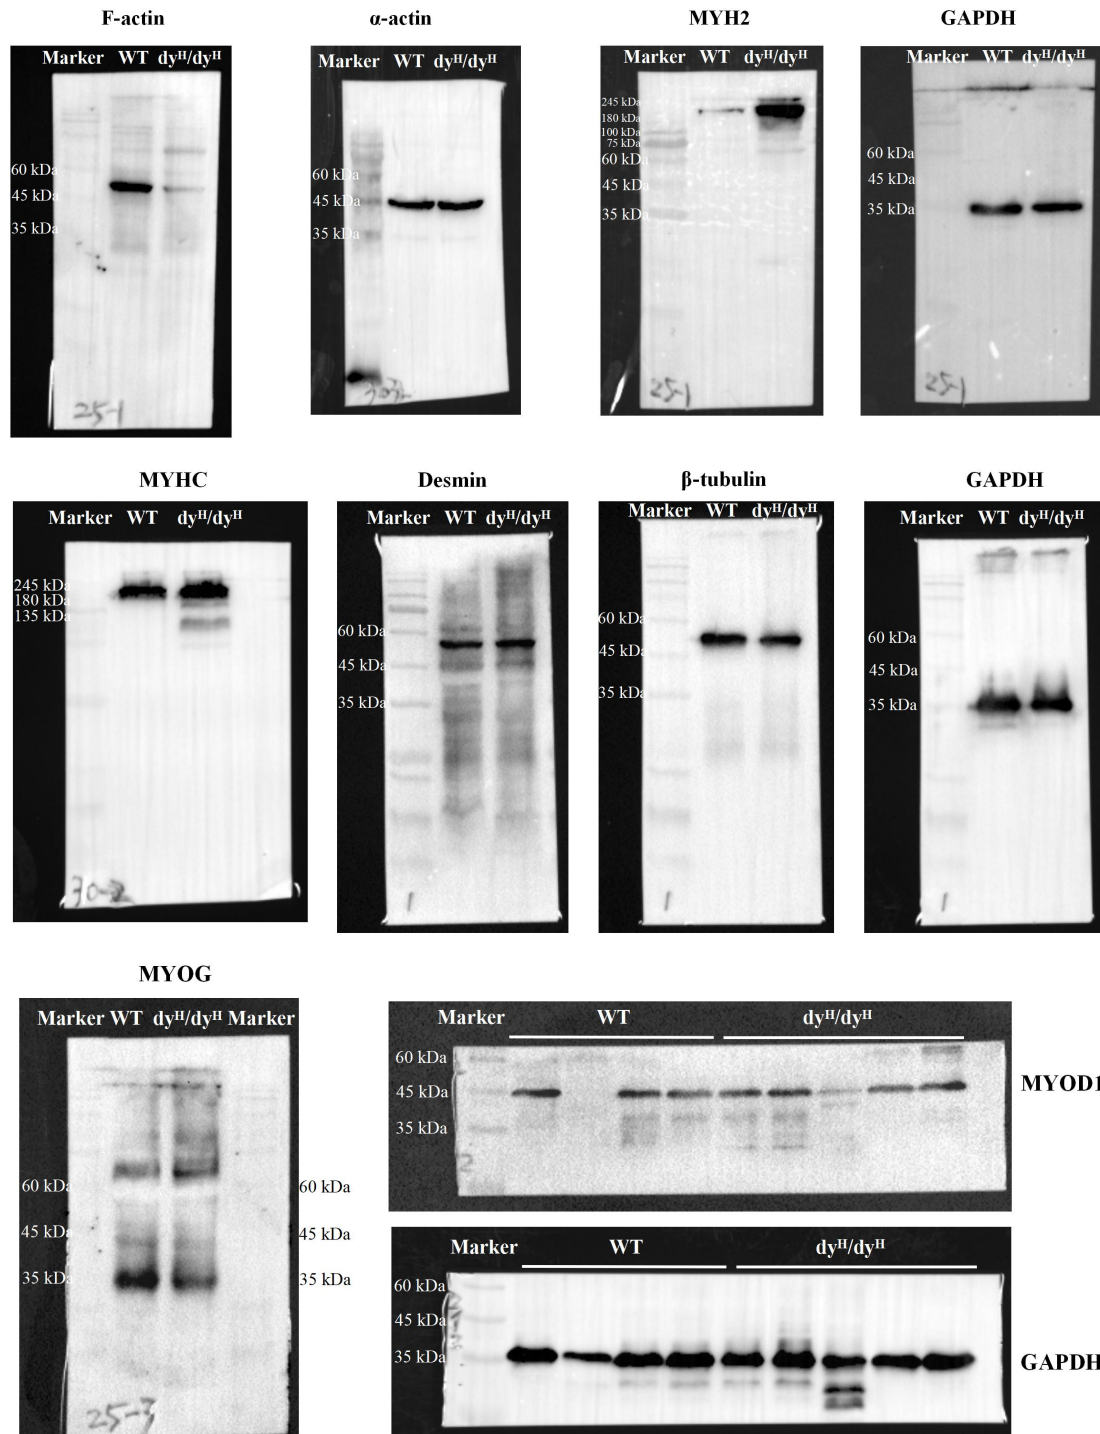

**Figure 8, Source Data 2.** Original membranes corresponding to Figure 8, panel B. The membranes correspond to F-actin,  $\alpha$ -actin, MYH2, MYHC, desmin,  $\beta$ -tubulin, MYOG, MYOD1, and GAPDH, respectively. Lanes correspond to  $dy^H/dy^H$  and WT. Rainbow molecular weight markers were employed.
