# Supplementary material for: A novel mouse model for LAMA2-related muscular dystrophy with analysis of molecular pathogenesis and clinical phenotype
Source: eLife. 2025 Sep 17;13:RP94288. doi: 10.7554/eLife.94288 (PMC12443477; doi:10.7554/eLife.94288)
Supplement: Supplementary file 2. [file elife-94288-supp2.xlsx]

## Sheet: Sheet1
ID	logFC	Pvalue	adj.Pvalue	regulation	pos_info	ref_pos_info	ensembl	entrez	uniprot	symbol	description	KO|N2	KO|N3	KO|N4	KO|N14	KO|N15	KO|N16	WT|N5	WT|N11	WT|N12	WT|N13
ENSMUSG00000019899	-3.03403938309972	1.8899e-11	2.76739e-07	down	10:-:26980036-27619758	10:-:26980036-27619758	ENSMUSG00000019899	16773	Q5DTP0	Lama2	Laminin subunit alpha-2 [Source:UniProtKB/Swiss-Prot;Acc:Q60675]	2.41511	1.52782	2.14811	2.71674	2.12837	2.4201	12.6941	16.2872	16.876	17.6225
ENSMUSG00000039126	3.09622	1.80477e-11	2.76739e-07	up	19:+:16956118-17223932	19:+:16956118-17223932	ENSMUSG00000039126	353211	Q52KR3	Prune2	prune homolog 2	5.26416	4.68974	3.84332	4.08567	5.04483	4.62727	0.28675	0.44426	0.45022	0.52217
ENSMUSG00000046805	5.04332	5.98033e-11	5.83799e-07	up	19:+:12460779-12465284	19:+:12460779-12465284	ENSMUSG00000046805	17476	A1L314	Mpeg1	macrophage expressed gene 1	97.8166	101.602	64.6598	49.2539	64.9634	61.4157	1.16279	3.46196	1.01765	2.11214
ENSMUSG00000018920	2.70018	5.96582e-10	4.36788e-06	up	11:-:70453983-70459984	11:-:70453983-70459984	ENSMUSG00000018920	66102	Q8BSU2	Cxcl16	C-X-C motif chemokine 16 [Source:UniProtKB/Swiss-Prot;Acc:Q8BSU2]	12.3553	14.4806	9.62966	10.036	10.8932	13.5222	1.0665	1.62809	1.14736	1.47389
ENSMUSG00000038642	4.53796	9.50861e-10	5.1944e-06	up	3:+:95526786-95556403	3:+:95526786-95556403	ENSMUSG00000038642	13040	O70370	Ctss	cathepsin S [Source:MGI Symbol;Acc:MGI:107341]	277.996	352.223	204.463	131.969	175.479	181.609	5.31904	12.6764	3.99106	10.0212
ENSMUSG00000071714	2.31303	1.15957e-09	5.1944e-06	up	15:-:78282507-78305721	15:-:78282507-78305721	ENSMUSG00000071714	12984	P26954	Csf2rb2	colony stimulating factor 2 receptor, beta 2, low-affinity (granulocyte-macrophage)	6.81388	9.22908	7.10932	6.8571	8.80846	6.94772	0.85513	1.2638	0.97059	1.45537
ENSMUSG00000040322	1.43566	1.96584e-09	5.1944e-06	up	3:+:109123149-109168457	3:+:109123149-109168457	ENSMUSG00000040322	229731	Q8BMD8	Slc25a24	Calcium-binding mitochondrial carrier protein SCaMC-1 [Source:UniProtKB/Swiss-Prot;Acc:Q8BMD8]	23.4154	23.7885	19.3869	20.0511	19.183	19.9458	5.52828	7.59038	5.51049	6.3426
ENSMUSG00000015340	2.85572	1.91001e-09	5.1944e-06	up	X:-:9435252-9487771	X:-:9435252-9487771	ENSMUSG00000015340	13058	Q61093	Cybb	Cytochrome b-245 heavy chain [Source:UniProtKB/Swiss-Prot;Acc:Q61093]	18.003	16.9034	13.0746	12.3315	16.4388	13.8864	1.08262	3.10508	1.10678	1.81402
ENSMUSG00000023153	-1.72582207041115	2.03819e-09	5.1944e-06	down	4:+:155469114-155470858	4:+:155469114-155470858	ENSMUSG00000023153	69671	Q9D702	Tmem52	transmembrane protein 52 [Source:MGI Symbol;Acc:MGI:1916921]	29.8902	20.4803	26.9332	31.9785	27.7669	29.7325	72.0875	75.5922	75.1684	79.3535
ENSMUSG00000026656	2.97432	2.12842e-09	5.1944e-06	up	1:-:170958617-170976547	1:-:170958617-170976547	ENSMUSG00000026656	14130	A0A0B4J1G1	Fcgr2b	Fc receptor, IgG, low affinity IIb	19.7167	23.8992	12.5699	14.1671	16.8847	20.6136	1.22959	2.33061	1.54561	2.16626
ENSMUSG00000087410	-2.74465863059959	1.98082e-09	5.1944e-06	down	11:-:67112461-67120080	11:-:67112461-67120080	ENSMUSG00000087410	74184	-	2310065F04Rik	RIKEN cDNA 2310065F04 gene	1.48029	1.25017	1.36687	1.69618	2.59957	2.22995	6.82542	9.77428	10.0065	8.17249
ENSMUSG00000040522	2.82014	2.07615e-09	5.1944e-06	up	X:-:167242696-167264329	X:-:167242696-167264329	ENSMUSG00000040522	170744	P58682	Tlr8	Toll-like receptor 8 [Source:UniProtKB/Swiss-Prot;Acc:P58682]	6.231	6.02893	4.22944	4.40649	5.50279	5.35219	0.39127	0.6682	0.45693	0.66456
ENSMUSG00000050069	-3.08566315582301	4.21786e-09	8.82317e-06	down	1:-:174833785-174921819	1:-:174833785-174921819	ENSMUSG00000050069	23893	O88273	Grem2	Gremlin-2 [Source:UniProtKB/Swiss-Prot;Acc:O88273]	3.22731	1.98741	4.46453	4.88834	5.36554	5.8671	31.5958	28.7251	28.5743	24.248
ENSMUSG00000034593	1.43823	5.30631e-09	1.036e-05	up	9:+:75071015-75223688	9:+:75071015-75223688	ENSMUSG00000034593	17918	Q99104	Myo5a	Unconventional myosin-Va [Source:UniProtKB/Swiss-Prot;Acc:Q99104]	8.56612	8.93059	7.60562	7.21624	7.7869	7.75456	1.79386	2.96905	2.49481	2.76221
ENSMUSG00000028584	-2.64103323712265	7.87026e-09	1.44055e-05	down	4:+:143349757-143371032	4:+:143349757-143371032	ENSMUSG00000028584	242735	A2VDH3	Lrrc38	Leucine-rich repeat-containing protein 38 [Source:UniProtKB/Swiss-Prot;Acc:A2VDH3]	3.1466	1.50327	2.58373	3.45495	5.07387	3.47493	14.2884	15.71	13.586	13.3576
ENSMUSG00000079293	4.08733	3.06107e-09	6.89587e-06	up	6:-:129461591-129472779	6:-:129461591-129472779	ENSMUSG00000079293	56644	V9GXI5	Clec7a	Mus musculus C-type lectin domain family 7, member a (Clec7a), transcript variant 1, coding, mRNA. [Source:RefSeq mRNA;Acc:NM_020008]	12.5128	10.8634	9.3206	7.47536	8.50654	11.1121	0.35458	0.81271	0.21501	0.47546
ENSMUSG00000028581	2.54948	1.00096e-08	1.72436e-05	up	4:+:130913125-130936141	4:+:130913125-130936141	ENSMUSG00000028581	16792	Q544S4	Laptm5	lysosomal-associated protein transmembrane 5 [Source:MGI Symbol;Acc:MGI:108046]	50.166	55.1763	37.1556	29.1328	45.8994	37.4886	4.29391	9.92134	4.32567	6.40707
ENSMUSG00000004730	2.80453	1.38038e-08	1.74645e-05	up	17:+:57358686-57483529	17:+:57358686-57483529	ENSMUSG00000004730	13733	Q3U9R0	Adgre1	adhesion G protein-coupled receptor E1	45.321	57.1694	35.4131	25.0406	32.5188	30.9629	2.97863	5.6936	3.57349	5.10209
ENSMUSG00000071713	2.21778	1.42837e-08	1.74645e-05	up	15:+:78325798-78353847	15:+:78325798-78353847	ENSMUSG00000071713	12983	P26955	Csf2rb	colony stimulating factor 2 receptor, beta, low-affinity (granulocyte-macrophage)	7.92923	10.7843	7.98093	7.33106	9.77278	7.3802	0.99696	2.54312	1.12082	1.37879
ENSMUSG00000036606	1.31127	1.46455e-08	1.74645e-05	up	15:-:89155549-89180788	15:-:89155549-89180788	ENSMUSG00000036606	140570	B2RXS4	Plxnb2	plexin B2 [Source:MGI Symbol;Acc:MGI:2154239]	29.2855	29.2838	24.2056	21.5585	22.6463	22.022	7.72757	10.9941	7.43688	8.70023
ENSMUSG00000047591	-1.5496017476116	1.46101e-08	1.74645e-05	down	15:-:75745490-75748228	15:-:75745490-75748228	ENSMUSG00000047591	378435	Q8CF90	Mafa	v-maf musculoaponeurotic fibrosarcoma oncogene family, protein A (avian)	35.635	24.6596	35.5864	35.6702	38.8557	39.9186	88.7727	88.4963	104.852	90.7383
ENSMUSG00000037731	1.64015	1.47476e-08	1.74645e-05	up	4:-:132781843-132796387	4:-:132781843-132796387	ENSMUSG00000037731	230787	Q91YX0	Themis2	Protein THEMIS2 [Source:UniProtKB/Swiss-Prot;Acc:Q91YX0]	8.85686	8.41944	7.53171	6.50899	7.62033	7.10211	1.72151	2.19133	1.22809	2.09791
ENSMUSG00000004748	-1.81185696764212	1.5936e-08	1.74645e-05	down	11:-:4091480-4095445	11:-:4091480-4095445	ENSMUSG00000004748	67900	Q9CRB8	Mtfp1	Mitochondrial fission process protein 1 [Source:UniProtKB/Swiss-Prot;Acc:Q9CRB8]	8.70727	5.2438	9.53071	8.24183	7.33846	7.51295	21.2289	23.6918	20.2699	18.3665
ENSMUSG00000101655	-1.86321809665311	1.61012e-08	1.74645e-05	down	6:-:86483376-86488227	6:-:86483376-86488227	ENSMUSG00000101655	381792	-	2310040G24Rik	RIKEN cDNA 2310040G24 gene	27.1933	24.0419	29.2548	31.4956	29.8867	34.8471	114.124	70.5426	79.0413	86.0181
ENSMUSG00000090799	-2.76789117961138	1.55124e-08	1.74645e-05	down	14:-:50888582-50897507	14:-:50888582-50897507	ENSMUSG00000090799	546611	G3UW92	Klhl33	kelch-like 33	7.70607	3.35134	8.16716	9.8391	7.8974	8.60679	44.2617	35.7624	50.2172	43.5209
ENSMUSG00000005716	-1.46757600617813	1.38954e-08	1.74645e-05	down	15:-:78191114-78206400	15:-:78191114-78206400	ENSMUSG00000005716	19293	P32848	Pvalb	parvalbumin [Source:MGI Symbol;Acc:MGI:97821]	1950.91	1913.55	1852.85	2446.4	2613.65	2819.91	11094.3	6948.09	7591.47	7388.04
ENSMUSG00000073421	2.74595	2.09663e-08	1.89339e-05	up	17:+:34263209-34269418	17:+:34263209-34269418	ENSMUSG00000073421	14961	P14483	H2-Ab1	histocompatibility 2, class II antigen A, beta 1 [Source:MGI Symbol;Acc:MGI:103070]	54.0399	47.4769	30.8622	49.4413	58.618	57.2129	4.82518	10.1307	3.77283	5.21013
ENSMUSG00000028599	2.16924	2.13351e-08	1.89339e-05	up	4:-:145213463-145246870	4:-:145213463-145246870	ENSMUSG00000028599	21938	Q545P4	Tnfrsf1b	tumor necrosis factor receptor superfamily, member 1b [Source:MGI Symbol;Acc:MGI:1314883]	28.3707	29.6125	22.872	15.6296	19.807	19.3387	3.22575	5.11988	3.18575	4.46778
ENSMUSG00000034652	2.48438	1.91044e-08	1.89339e-05	up	11:+:114890041-114904654	11:+:114890041-114904654	ENSMUSG00000034652	217303	Q6SJQ0	Cd300a	Mus musculus CD300A molecule (Cd300a), transcript variant 2, mRNA. [Source:RefSeq mRNA;Acc:NM_001347654]	7.39553	6.76444	5.81222	4.40612	4.79972	4.21688	0.65807	0.74529	0.51875	0.9133
ENSMUSG00000035673	1.59007	2.22973e-08	1.91031e-05	up	10:-:80056992-80105571	10:-:80056992-80105571	ENSMUSG00000035673	216161	Q7TNB8	Sbno2	strawberry notch 2	6.76786	9.16239	8.1305	6.80412	6.81064	5.65263	1.73139	2.2657	1.51746	2.20067
ENSMUSG00000106019	-1.7120575792866	2.32756e-08	1.91031e-05	down	3:-:22074412-22076142	3:-:22074412-22076142	ENSMUSG00000106019	-	-	Gm43672	predicted gene 43672 [Source:MGI Symbol;Acc:MGI:5663809]	4.75262	4.65075	5.38271	3.78505	4.65722	5.45301	12.1284	9.87202	11.2135	13.8034
ENSMUSG00000047443	-2.37000041145145	2.01598e-08	1.89339e-05	down	1:+:91366430-91374217	1:+:91366430-91374217	ENSMUSG00000047443	227358	Q6PGN1	Erfe	Erythroferrone [Source:UniProtKB/Swiss-Prot;Acc:Q6PGN1]	0.902	0.70147	0.93781	1.25503	0.76938	0.57749	2.91673	4.05447	2.95519	2.47288
ENSMUSG00000029470	1.86405	2.90636e-08	2.14159e-05	up	5:+:122707544-122729738	5:+:122707544-122729738	ENSMUSG00000029470	18438	D3Z5U5	P2rx4	purinergic receptor P2X 4 [Source:HGNC Symbol;Acc:HGNC:8535]	6.86741	7.89927	5.7769	5.09304	5.76352	5.92701	1.18356	1.8401	0.78945	1.57118
ENSMUSG00000005142	1.51345	2.92507e-08	2.14159e-05	up	8:+:85083270-85098282	8:+:85083270-85098282	ENSMUSG00000005142	17159	O09159	Man2b1	Lysosomal alpha-mannosidase [Source:UniProtKB/Swiss-Prot;Acc:O09159]	26.3151	24.767	19.6129	16.1507	20.6435	21.2869	5.43227	8.07659	5.37875	7.02456
ENSMUSG00000060586	2.75491	3.26662e-08	2.22661e-05	up	17:+:34305877-34316199	17:+:34305877-34316199	ENSMUSG00000060586	14969	O78196	H2-Eb1	histocompatibility 2, class II antigen E beta	66.2233	62.6482	39.26	61.1421	73.2203	76.5338	6.40795	13.2079	4.7905	5.77342
ENSMUSG00000037742	1.46801	2.699e-08	2.13629e-05	up	9:-:78478449-78489151	9:-:78478449-78489151	ENSMUSG00000037742	13627	Q58E64	Eef1a1	Elongation factor 1-alpha 1 [Source:UniProtKB/Swiss-Prot;Acc:P10126]	1834.98	1907.09	1468.38	1562.09	1590.55	1722.82	662.487	896.331	564.338	812.755
ENSMUSG00000025355	2.42619	3.26929e-08	2.22661e-05	up	10:+:128790910-128800824	10:+:128790910-128800824	ENSMUSG00000025355	58223	Q9JHI0	Mmp19	matrix metallopeptidase 19	11.4559	15.1336	10.5491	9.0361	9.87651	8.90571	0.98548	2.37379	0.94541	2.04133
ENSMUSG00000041801	1.11573	3.25615e-08	2.22661e-05	up	1:+:135766119-135769136	1:+:135766119-135769136	ENSMUSG00000041801	27280	Q9WV95	Phlda3	Pleckstrin homology-like domain family A member 3 [Source:UniProtKB/Swiss-Prot;Acc:Q9WV95]	71.5648	72.911	64.7461	67.9427	59.8143	64.3809	23.5663	23.5807	24.578	32.2214
ENSMUSG00000072620	2.39188	3.84993e-08	2.47403e-05	up	11:+:83065112-83070678	11:+:83065112-83070678	ENSMUSG00000072620	20556	Q9Z0I6	Slfn2	schlafen 2 [Source:MGI Symbol;Acc:MGI:1313258]	20.0506	25.042	17.7004	22.8913	24.8022	18.4359	1.93623	5.76002	1.89368	3.58038
ENSMUSG00000021814	1.08072	3.84155e-08	2.47403e-05	up	14:-:20455260-20480133	14:-:20455260-20480133	ENSMUSG00000021814	11750	Q3UYL7	Anxa7	annexin A7	19.9791	22.2185	18.6543	17.0584	16.5191	16.9548	7.27748	7.75715	6.17488	8.2487
ENSMUSG00000085965	-2.4950342379316	3.97925e-08	2.4795e-05	down	1:+:60778843-60803790	1:+:60778843-60803790	ENSMUSG00000085965	76443	-	2310016D23Rik	RIKEN cDNA 2310016D23 gene [Source:MGI Symbol;Acc:MGI:1923693]	5.62797	7.04669	9.87246	14.7342	17.6763	9.46079	44.4656	40.7921	34.1097	45.7418
ENSMUSG00000021614	1.13142	3.886e-08	2.47403e-05	up	13:-:89655312-89742509	13:-:89655312-89742509	ENSMUSG00000021614	13003	E9QMK2	Vcan	versican [Source:MGI Symbol;Acc:MGI:102889]	17.1394	21.0656	18.1005	16.5095	18.0543	16.1794	5.72408	8.92531	6.96367	8.0397
ENSMUSG00000073490	2.0671	4.48971e-08	2.61585e-05	up	1:-:173723427-173741747	1:-:173723427-173741747	ENSMUSG00000073490	226691	E9Q3L4	Ifi207	interferon activated gene 207	11.8275	13.8194	9.40883	13.4401	15.2777	10.9569	1.51858	3.31685	1.76799	2.65734
ENSMUSG00000000317	-1.35510799471111	4.59115e-08	2.61585e-05	down	11:-:70224128-70229798	11:-:70224128-70229798	ENSMUSG00000000317	12029	Q5BKP3	Bcl6b	B-cell CLL/lymphoma 6 member B protein [Source:UniProtKB/Swiss-Prot;Acc:O88282]	4.79288	4.49273	5.77626	6.32155	5.85601	5.30179	10.4519	10.8175	9.8286	12.6303
ENSMUSG00000024621	2.01935	4.34013e-08	2.61585e-05	up	18:+:61105572-61132149	18:+:61105572-61132149	ENSMUSG00000024621	12978	Q3UKC6	Csf1r	Macrophage colony-stimulating factor 1 receptor [Source:UniProtKB/Swiss-Prot;Acc:P09581]	72.3328	70.501	48.1609	41.6571	53.3387	56.4439	8.35071	19.0139	9.63708	14.1602
ENSMUSG00000024803	3.58098	4.64469e-08	2.61585e-05	up	19:-:36111965-36119844	19:-:36111965-36119844	ENSMUSG00000024803	107765	Q9CR42	Ankrd1	ankyrin repeat domain 1 (cardiac muscle)	41.6619	49.599	27.2749	30.425	26.9278	42.3975	1.7371	1.46478	1.6782	5.50739
ENSMUSG00000034947	2.21857	5.11505e-08	2.62806e-05	up	11:+:101582242-101591788	11:+:101582242-101591788	ENSMUSG00000034947	217203	Q8VC04	Tmem106a	Mus musculus transmembrane protein 106A (Tmem106a), transcript variant 2, mRNA. [Source:RefSeq mRNA;Acc:NM_001359326]	11.5709	17.4743	10.8707	9.06816	11.5415	9.95989	1.32482	2.75297	1.446	2.05846
ENSMUSG00000058818	3.01256	5.09551e-08	2.62806e-05	up	7:-:3711409-3720391	7:-:3711409-3720391	ENSMUSG00000058818	18733	P97484	Pirb	Leukocyte immunoglobulin-like receptor subfamily B member 3 [Source:UniProtKB/Swiss-Prot;Acc:P97484]	10.8585	14.7558	10.9872	6.98232	9.19042	7.0256	0.59277	1.38215	0.59202	1.19226
ENSMUSG00000021702	3.67362	4.76955e-08	2.62806e-05	up	13:-:92751590-92794818	13:-:92751590-92794818	ENSMUSG00000021702	21828	Q9Z1T2	Thbs4	thrombospondin 4 [Source:MGI Symbol;Acc:MGI:1101779]	540.56	639.709	461.419	244.224	254.658	318.083	36.64	27.627	18.2799	32.7199
ENSMUSG00000026827	-1.83366063055581	4.91367e-08	2.62806e-05	down	2:+:57237635-57370719	2:+:57237635-57370719	ENSMUSG00000026827	14571	Q64521	Gpd2	glycerol phosphate dehydrogenase 2, mitochondrial [Source:MGI Symbol;Acc:MGI:99778]	8.40562	8.36518	10.8127	13.663	14.0551	13.5483	34.6519	36.7231	43.3328	29.5707
ENSMUSG00000036594	2.99466	5.54146e-08	2.75063e-05	up	17:-:34282744-34287827	17:-:34282744-34287827	ENSMUSG00000036594	14960	P14434	H2-Aa	H-2 class II histocompatibility antigen, A-B alpha chain [Source:UniProtKB/Swiss-Prot;Acc:P14434]	55.9314	50.1995	29.9699	60.1213	68.6047	71.4122	4.74182	8.74858	4.03554	4.71854
ENSMUSG00000022148	3.22499	4.93824e-08	2.62806e-05	up	15:+:6522853-6663313	15:+:6522853-6663313	ENSMUSG00000022148	23880	B2RUR0	Fyb	FYN-binding protein 1 [Source:UniProtKB/Swiss-Prot;Acc:O35601]	7.55515	8.16277	6.86465	4.5575	6.81622	4.97711	0.22199	1.00723	0.42139	0.65229
ENSMUSG00000052160	2.50067	5.75511e-08	2.79232e-05	up	12:+:112760655-112768990	12:+:112760655-112768990	ENSMUSG00000052160	104759	Q8BG07	Pld4	phospholipase D family, member 4	22.751	25.5206	18.5853	14.2867	20.3145	15.7683	1.45601	4.35316	2.07524	3.67729
ENSMUSG00000044768	-1.00639254582772	5.97327e-08	2.79232e-05	down	1:-:97606318-97662074	1:-:97606318-97662074	ENSMUSG00000044768	52392	Q8VEB3	D1Ertd622e	DNA segment, Chr 1, ERATO Doi 622, expressed [Source:MGI Symbol;Acc:MGI:1277184]	0.54194	0.60772	0.58122	0.48031	0.55468	0.5444	0.93434	0.9064	0.82201	0.82861
ENSMUSG00000034708	1.52857	5.45402e-08	2.75063e-05	up	11:+:102430315-102437048	11:+:102430315-102437048	ENSMUSG00000034708	14824	Q9D2V3	Grn	granulin [Source:MGI Symbol;Acc:MGI:95832]	109.62	133.531	94.9895	72.0928	90.7619	82.0259	24.7414	40.2774	25.3248	30.7609
ENSMUSG00000027797	2.6349	6.31204e-08	2.79232e-05	up	3:+:55242364-55539068	3:+:55242364-55539068	ENSMUSG00000027797	13175	Q9JLM8	Dclk1	Mus musculus doublecortin-like kinase 1 (Dclk1), transcript variant 12, mRNA. [Source:RefSeq mRNA;Acc:NM_001357475]	15.9459	11.741	7.23527	6.6477	8.7906	13.134	1.12113	1.59951	1.28136	1.36939
ENSMUSG00000041515	2.22403	6.52806e-08	2.79232e-05	up	8:+:120736358-120756694	8:+:120736358-120756694	ENSMUSG00000041515	15900	Q544J7	Irf8	interferon regulatory factor 8 [Source:MGI Symbol;Acc:MGI:96395]	8.04749	7.54991	6.22925	4.3521	7.00108	4.78685	1.06068	1.31388	0.91116	0.75558
ENSMUSG00000039197	-1.14236398401426	6.28464e-08	2.79232e-05	down	14:+:21052574-21448569	14:+:21052574-21448569	ENSMUSG00000039197	11534	Q8BMC5	Adk	adenosine kinase	3.67498	4.69142	4.57167	4.55804	3.92327	4.60678	7.86254	9.01555	7.73911	6.90683
ENSMUSG00000040552	3.48139	6.65323e-08	2.79232e-05	up	6:-:122847138-122856161	6:-:122847138-122856161	ENSMUSG00000040552	12267	Q5U7A4	C3ar1	C3a anaphylatoxin chemotactic receptor [Source:UniProtKB/Swiss-Prot;Acc:O09047]	24.7956	31.8257	18.7576	11.4742	15.7776	14.1058	1.07432	1.50868	0.87835	1.61699
ENSMUSG00000002985	3.03354	5.90929e-08	2.79232e-05	up	7:-:19696109-19699188	7:-:19696109-19699188	ENSMUSG00000002985	11816	Q3TXU4	Apoe	Apolipoprotein E [Source:UniProtKB/Swiss-Prot;Acc:P08226]	986.176	976.876	498.922	539.233	547.673	600.115	67.9834	121.189	52.6458	105.861
ENSMUSG00000038147	3.18084	6.67426e-08	2.79232e-05	up	1:+:171839697-171890718	1:+:171839697-171890718	ENSMUSG00000038147	12523	Q18PI6	Cd84	CD84 antigen [Source:MGI Symbol;Acc:MGI:1336885]	7.05225	9.23513	7.87349	4.49601	5.58259	5.48478	0.4557	1.0858	0.2512	0.56994
ENSMUSG00000024672	3.70589	6.79665e-08	2.80347e-05	up	19:-:11321039-11336146	19:-:11321039-11336146	ENSMUSG00000024672	109225	Q8BV59	Ms4a7	membrane-spanning 4-domains, subfamily A, member 7	16.8097	19.284	9.4623	7.93375	10.7677	10.3042	0.77021	0.79299	0.39627	0.78867
ENSMUSG00000022488	2.65614	7.51814e-08	2.80928e-05	up	15:+:103453794-103498810	15:+:103453794-103498810	ENSMUSG00000022488	105855	Q8K1X4	Nckap1l	NCK associated protein 1 like	17.9001	22.3684	16.4056	9.8814	14.0799	11.6278	1.16453	3.03864	1.52908	2.17673
ENSMUSG00000023367	1.56864	7.69836e-08	2.80928e-05	up	6:+:48840919-48847071	6:+:48840919-48847071	ENSMUSG00000023367	66058	Q9DCS1	Tmem176a	Transmembrane protein 176A [Source:UniProtKB/Swiss-Prot;Acc:Q9DCS1]	17.634	16.5982	11.7793	12.4929	14.4167	13.6536	3.328	5.34578	2.71274	4.27964
ENSMUSG00000026600	1.54574	7.7667e-08	2.80928e-05	up	1:-:156424525-156474331	1:-:156424525-156474331	ENSMUSG00000026600	20652	Q61263	Soat1	Sterol O-acyltransferase 1 [Source:UniProtKB/Swiss-Prot;Acc:Q61263]	5.59123	6.7278	4.59957	3.85761	4.82964	4.44541	1.13581	1.61008	1.23584	1.35149
ENSMUSG00000037977	-2.21537717515962	7.90793e-08	2.80928e-05	down	9:+:107340602-107352422	9:+:107340602-107352422	ENSMUSG00000037977	235599	Q14AT3	6430571L13Rik	Uncharacterized [Source:UniProtKB/Swiss-Prot;Acc:Q8BGK9]	6.40015	3.61655	6.06161	6.11022	7.12766	6.12278	28.6241	26.8729	18.3741	15.0322
ENSMUSG00000024085	1.0193	7.36252e-08	2.80928e-05	up	17:+:64600736-64755110	17:+:64600736-64755110	ENSMUSG00000024085	17158	Q8C4L1	Man2a1	Alpha-mannosidase 2 [Source:UniProtKB/Swiss-Prot;Acc:P27046]	25.0152	32.3152	27.2972	23.4599	25.2873	23.5446	10.1299	13.8982	10.3393	11.235
ENSMUSG00000020908	3.63806	7.4312e-08	2.80928e-05	up	11:+:67078300-67102291	11:+:67078300-67102291	ENSMUSG00000020908	17883	P13541	Myh3	Myosin-3 [Source:UniProtKB/Swiss-Prot;Acc:P13541]	254.567	124.494	81.1964	97.1524	112.864	226.763	7.21534	11.6911	6.69026	15.9967
ENSMUSG00000040998	2.06666	8.11322e-08	2.80928e-05	up	3:-:132881745-132950291	3:-:132881745-132950291	ENSMUSG00000040998	114249	Q91V88	Npnt	Nephronectin [Source:UniProtKB/Swiss-Prot;Acc:Q91V88]	34.2727	19.9565	16.6641	19.5157	20.5406	27.1589	4.89054	4.755	3.37302	4.55438
ENSMUSG00000039062	1.339	7.97467e-08	2.80928e-05	up	7:-:79821803-79861059	7:-:79821803-79861059	ENSMUSG00000039062	16790	P97449	Anpep	Aminopeptidase N [Source:UniProtKB/Swiss-Prot;Acc:P97449]	27.1414	32.3994	24.3608	20.3189	22.988	25.7697	6.83662	9.4395	7.11756	10.0402
ENSMUSG00000026395	2.70919	8.42661e-08	2.86955e-05	up	1:-:138062861-138175708	1:-:138062861-138175708	ENSMUSG00000026395	19264	S4R1S4	Ptprc	protein tyrosine phosphatase, receptor type, C [Source:MGI Symbol;Acc:MGI:97810]	4.75576	5.41901	4.05901	3.79171	7.52964	3.81708	0.39443	0.96412	0.33725	0.79449
ENSMUSG00000033880	1.86626	8.15367e-08	2.80928e-05	up	11:-:118392751-118402092	11:-:118392751-118402092	ENSMUSG00000033880	19039	Q07797	Lgals3bp	Galectin-3-binding protein [Source:UniProtKB/Swiss-Prot;Acc:Q07797]	31.786	30.2688	27.1637	36.8215	44.0593	40.5041	6.79006	11.9824	5.97676	7.26917
ENSMUSG00000042254	2.04951	7.1401e-08	2.80928e-05	up	9:+:65265180-65280605	9:+:65265180-65280605	ENSMUSG00000042254	214425	Q66K08	Cilp	cartilage intermediate layer protein [Source:HGNC Symbol;Acc:HGNC:1980]	328.606	322.486	204.328	241.937	220.116	263.297	42.6775	44.7569	82.186	73.8782
ENSMUSG00000025017	2.829	7.79161e-08	2.80928e-05	up	19:-:41274218-41385070	19:-:41274218-41385070	ENSMUSG00000025017	83490	Q9EQ32	Pik3ap1	phosphoinositide-3-kinase adaptor protein 1	9.67104	9.99082	10.135	7.3446	10.859	7.15909	0.59617	2.21845	0.5061	1.05521
ENSMUSG00000059498	2.56707	8.83624e-08	2.87915e-05	up	1:-:171051174-171064935	1:-:171051174-171064935	ENSMUSG00000059498	14131	A0A0B4J1M6	Fcgr3	Mus musculus Fc receptor, IgG, low affinity III (Fcgr3), transcript variant 2, mRNA. [Source:RefSeq mRNA;Acc:NM_001356511]	65.2335	88.8972	47.5892	37.1495	45.8143	48.966	4.81942	10.5701	6.17147	8.38102
ENSMUSG00000074818	-2.46162311114618	9.28124e-08	2.87915e-05	down	19:-:45026906-45046614	19:-:45026906-45046614	ENSMUSG00000074818	100503041	E9Q9W7	Pdzd7	PDZ domain containing 7 [Source:HGNC Symbol;Acc:HGNC:26257]	1.68903	1.06489	2.44324	3.25178	3.44285	2.01346	9.91279	9.39148	8.66181	8.06728
ENSMUSG00000038195	-1.25931369108538	9.23547e-08	2.87915e-05	down	11:+:75510094-75513168	11:+:75510094-75513168	ENSMUSG00000038195	280408	Q5ND29	Rilp	Rab interacting lysosomal protein [Source:MGI Symbol;Acc:MGI:2144271]	12.7678	10.9068	13.9628	13.5124	15.4299	10.8987	25.8024	26.8082	22.0556	21.9872
ENSMUSG00000029810	1.64036	9.01229e-08	2.87915e-05	up	6:-:48833818-48841496	6:-:48833818-48841496	ENSMUSG00000029810	65963	Q9R1Q6	Tmem176b	Transmembrane protein 176B [Source:UniProtKB/Swiss-Prot;Acc:Q9R1Q6]	55.2162	56.9314	37.7257	36.4655	38.2892	46.2691	11.5504	15.5848	8.47908	11.9025
ENSMUSG00000022096	-1.26136789678973	9.05276e-08	2.87915e-05	down	14:+:70552212-70573548	14:+:70552212-70573548	ENSMUSG00000022096	15460	Q61645	Hr	Lysine-specific demethylase hairless [Source:UniProtKB/Swiss-Prot;Acc:Q61645]	5.54139	3.65889	4.16713	4.84614	4.06932	4.88094	8.60715	10.107	8.03369	8.42943
ENSMUSG00000039419	-2.66116312022352	8.99614e-08	2.87915e-05	down	6:+:45059357-47304213	6:+:45059357-47304213	ENSMUSG00000039419	66797	E9QNF7	Cntnap2	Contactin-associated protein-like 2 [Source:UniProtKB/Swiss-Prot;Acc:Q9CPW0]	0.27255	0.17292	0.32327	0.32594	0.28179	0.39913	1.73929	0.9968	1.53126	1.17495
ENSMUSG00000064225	-2.33936053554664	9.64786e-08	2.92029e-05	down	9:+:95559657-95568023	9:+:95559657-95568023	ENSMUSG00000064225	75552	Q6TCG2	Paqr9	Membrane progesterone receptor epsilon [Source:UniProtKB/Swiss-Prot;Acc:Q6TCG2]	0.38844	0.36913	1.07029	0.79842	0.83408	0.56407	2.0123	2.61513	2.21446	2.5559
ENSMUSG00000056529	1.88041	9.9099e-08	2.96144e-05	up	4:+:132564067-132582683	4:+:132564067-132582683	ENSMUSG00000056529	19204	Q62035	Ptafr	Platelet-activating factor receptor [Source:UniProtKB/Swiss-Prot;Acc:Q62035]	8.76863	9.22982	6.86008	6.09318	8.0061	7.43991	1.02874	2.47929	1.09166	1.8795
ENSMUSG00000022912	1.31018	9.3396e-08	2.87915e-05	up	16:+:62854307-62929346	16:+:62854307-62929346	ENSMUSG00000022912	19128	Q3TR66	Pros1	protein S (alpha) [Source:MGI Symbol;Acc:MGI:1095733]	30.236	41.6647	27.7179	30.5302	27.2258	27.3487	9.50843	12.8952	8.35561	11.3062
ENSMUSG00000042451	-1.27115482158345	8.59224e-08	2.87915e-05	down	1:+:134193448-134201232	1:+:134193448-134201232	ENSMUSG00000042451	53311	P70402	Mybph	Mus musculus myosin binding protein H (Mybph), transcript variant 2, mRNA. [Source:RefSeq mRNA;Acc:NM_001357515]	112.119	83.1109	75.034	81.1412	90.9785	106.748	206.324	218.412	232.82	169.964
ENSMUSG00000045312	1.15863	9.67249e-08	2.92029e-05	up	13:+:94057796-94195409	13:+:94057796-94195409	ENSMUSG00000045312	218454	Q8BGA2	Lhfpl2	LHFPL tetraspan subfamily member 2 protein [Source:UniProtKB/Swiss-Prot;Acc:Q8BGA2]	14.93	15.9266	11.6445	11.0531	12.6043	12.7314	4.79828	5.64254	3.93932	5.40309
ENSMUSG00000030683	-1.63963689291865	1.06242e-07	3.08058e-05	down	7:+:126950563-126970606	7:+:126950563-126970606	ENSMUSG00000030683	233878	Q4V9Z5	Sez6l2	Seizure 6-like protein 2 [Source:UniProtKB/Swiss-Prot;Acc:Q4V9Z5]	1.06149	0.90199	1.082	1.08329	0.97173	0.9342	2.75259	2.3066	2.00591	1.90672
ENSMUSG00000055541	3.79481	7.17063e-08	2.80928e-05	up	7:-:4003402-4063204	7:-:4003402-4063204	ENSMUSG00000055541	52855	Q8BG84	Lair1	Leukocyte-associated immunoglobulin-like receptor 1 [Source:UniProtKB/Swiss-Prot;Acc:Q8BG84]	3.79766	4.4434	2.87384	1.95067	2.55938	2.13968	0.13209	0.18559	0.10117	0.18457
ENSMUSG00000037902	2.05014	1.05197e-07	3.08058e-05	up	2:+:129592835-129632228	2:+:129592835-129632228	ENSMUSG00000037902	19261	P97797	Sirpa	signal-regulatory protein alpha [Source:MGI Symbol;Acc:MGI:108563]	43.3478	55.0547	37.492	26.1333	31.4467	30.4217	5.34367	10.2848	5.92873	9.11773
ENSMUSG00000063060	-1.46474720535934	1.13808e-07	3.2048e-05	down	14:+:63943673-63950732	14:+:63943673-63950732	ENSMUSG00000063060	20680	P40646	Sox7	SRY (sex determining region Y)-box 7	4.07924	4.42011	5.25639	6.54222	5.5256	5.96088	10.034	11.9654	11.1563	11.9571
ENSMUSG00000036905	2.82773	1.10294e-07	3.16673e-05	up	4:-:136880129-136886187	4:-:136880129-136886187	ENSMUSG00000036905	12260	P14106	C1qb	Complement C1q subcomponent subunit B [Source:UniProtKB/Swiss-Prot;Acc:P14106]	322.666	413.291	225.277	144.232	165.721	163.537	22.5918	37.4402	18.4779	28.5322
ENSMUSG00000021948	1.40318	1.15715e-07	3.22746e-05	up	14:-:30595354-30626210	14:-:30595354-30626210	ENSMUSG00000021948	18753	Q53YN4	Prkcd	protein kinase C, delta [Source:MGI Symbol;Acc:MGI:97598]	11.4224	12.8954	11.7738	8.0409	10.2874	9.63856	2.86825	3.85576	2.47812	3.73292
ENSMUSG00000044583	1.89926	1.232e-07	3.31086e-05	up	X:-:167304929-167330558	X:-:167304929-167330558	ENSMUSG00000044583	170743	Q548J0	Tlr7	toll-like receptor 7 [Source:MGI Symbol;Acc:MGI:2176882]	5.72269	6.0902	3.90574	4.86244	5.85109	4.65047	0.72564	1.52931	0.72563	1.13689
ENSMUSG00000022952	2.70656	1.2654e-07	3.33659e-05	up	16:-:92601466-92826149	16:-:92601466-92826149	ENSMUSG00000022952	12394	Q3UM65	Runx1	runt related transcription factor 1 [Source:MGI Symbol;Acc:MGI:99852]	7.21357	9.76503	7.29602	4.05709	4.2017	5.37833	0.65029	0.89038	0.63411	0.70524
ENSMUSG00000031880	2.71011	1.28221e-07	3.33659e-05	up	8:-:104628070-104631327	8:-:104628070-104631327	ENSMUSG00000031880	56437	Q6PGA2	Rrad	Ras-related associated with diabetes [Source:MGI Symbol;Acc:MGI:1930943]	35.1003	43.8573	31.544	24.3171	24.53	33.7849	4.08609	2.67903	2.07808	7.23766
ENSMUSG00000069516	3.17484	1.11765e-07	3.17782e-05	up	10:-:117277331-117282321	10:-:117277331-117282321	ENSMUSG00000069516	17105	A0A077S2U6	Lyz2	lysozyme 2	948.355	1122.67	547.845	384.675	496.104	487.14	48.9253	105.463	39.3646	67.5739
ENSMUSG00000018819	1.57092	1.21696e-07	3.31086e-05	up	7:+:142460809-142494867	7:+:142460809-142494867	ENSMUSG00000018819	16985	P19973	Lsp1	Lymphocyte-specific protein 1 [Source:UniProtKB/Swiss-Prot;Acc:P19973]	31.3588	31.843	23.7609	21.1922	22.8716	23.8178	5.59432	10.3226	5.46902	8.59366
ENSMUSG00000061086	3.65677	1.22992e-07	3.31086e-05	up	11:+:104550663-104595753	11:+:104550663-104595753	ENSMUSG00000061086	17896	Q9CZ19	Myl4	Mus musculus myosin, light polypeptide 4 (Myl4), transcript variant 2, mRNA. [Source:RefSeq mRNA;Acc:NM_001355755]	156.937	92.43	41.3149	84.1546	71.8384	144.405	6.42149	4.55556	6.60524	6.65406
ENSMUSG00000044827	3.54953	7.21206e-08	2.80928e-05	up	5:-:64924679-64933563	5:-:64924679-64933563	ENSMUSG00000044827	21897	B9EJ46	Tlr1	toll-like receptor 1 [Source:MGI Symbol;Acc:MGI:1341295]	5.32717	6.26466	3.83664	3.14837	4.47706	3.08746	0.24849	0.37691	0.18835	0.22491
ENSMUSG00000028600	1.34543	1.34925e-07	3.33659e-05	up	4:-:108014791-108096445	4:-:108014791-108096445	ENSMUSG00000028600	242608	Q7TQ62	Podn	podocan [Source:MGI Symbol;Acc:MGI:2674939]	13.546	15.7587	13.2864	12.3655	12.2014	13.1775	3.00599	4.41547	4.04401	5.75727
ENSMUSG00000015355	2.30659	1.23227e-07	3.31086e-05	up	1:+:171682009-171705258	1:+:171682009-171705258	ENSMUSG00000015355	12506	P18181	Cd48	CD48 antigen [Source:UniProtKB/Swiss-Prot;Acc:P18181]	13.6246	19.12	12.1899	10.1025	14.6736	11.6876	1.48599	2.91685	1.27209	2.42624
ENSMUSG00000039611	-1.22055616728007	1.32435e-07	3.33659e-05	down	4:-:49584506-49597876	4:-:49584506-49597876	ENSMUSG00000039611	67063	Q91YV9	Tmem246	Mus musculus transmembrane protein 246 (Tmem246), transcript variant 2, mRNA. [Source:RefSeq mRNA;Acc:NM_001355503]	9.57616	7.00469	10.1348	8.42293	10.0058	9.65208	18.0201	18.206	15.1062	17.3711
ENSMUSG00000024395	-1.21658453447971	1.34965e-07	3.33659e-05	down	18:+:31931325-31958619	18:+:31931325-31958619	ENSMUSG00000024395	225341	Q91XD2	Lims2	LIM and senescent cell antigen like domains 2	8.8284	9.22683	9.55151	11.8771	11.147	9.99615	18.9795	22.9823	15.3049	18.2425
ENSMUSG00000050323	-1.44870659587141	1.42892e-07	3.37479e-05	down	4:-:11051045-11076205	4:-:11051045-11076205	ENSMUSG00000050323	76947	A2AIL4	Ndufaf6	NADH dehydrogenase (ubiquinone) complex I, assembly factor 6 [Source:UniProtKB/Swiss-Prot;Acc:A2AIL4]	7.64824	6.39559	8.84384	9.67419	10.0838	8.27997	17.336	17.4109	17.6052	16.2496
ENSMUSG00000044734	1.87935	1.49601e-07	3.47715e-05	up	13:-:32842092-32851185	13:-:32842092-32851185	ENSMUSG00000044734	66222	Q9D154	Serpinb1a	serine (or cysteine) peptidase inhibitor, clade B, member 1a [Source:MGI Symbol;Acc:MGI:1913472]	25.0936	31.9664	27.2192	18.7153	21.3165	19.9239	5.23495	5.77727	2.98279	6.88946
ENSMUSG00000032114	-1.63846988529883	1.38137e-07	3.34336e-05	down	9:+:44396852-44402968	9:+:44396852-44402968	ENSMUSG00000032114	14385	Q9D1F9	Slc37a4	glucose-6-phosphate exchanger SLC37A4 isoform a [Source:RefSeq peptide;Acc:NP_001344659]	18.8591	12.9016	15.2736	21.9661	22.0473	23.2739	56.4767	51.5139	50.4923	41.6185
ENSMUSG00000116066	-2.22109757002913	1.35311e-07	3.33659e-05	down	15:+:103135881-103140669	15:+:103135881-103140669	ENSMUSG00000116066	-	-	AC162693.1	-	2.17381	1.92654	4.00076	2.67326	3.57679	2.05769	9.08321	7.12298	9.06732	9.99234
ENSMUSG00000022665	1.1518	1.32357e-07	3.33659e-05	up	16:+:45093402-45127924	16:+:45093402-45127924	ENSMUSG00000022665	67896	Q8R2G6	Ccdc80	Coiled-coil domain-containing protein 80 [Source:UniProtKB/Swiss-Prot;Acc:Q8R2G6]	82.4298	89.2905	65.4673	89.4008	81.0147	87.007	30.5017	42.9519	27.4007	35.6738
ENSMUSG00000022215	-1.09820879549692	1.35578e-07	3.33659e-05	down	14:+:55575617-55576954	14:+:55575617-55576954	ENSMUSG00000022215	68680	Q91V79	Fitm1	Fat storage-inducing transmembrane protein 1 [Source:UniProtKB/Swiss-Prot;Acc:Q91V79]	104.912	93.5462	125.544	101.082	97.7703	97.2108	252.497	198.523	176.928	171.928
ENSMUSG00000026177	2.69189	1.5828e-07	3.57262e-05	up	1:+:74375195-74386062	1:+:74375195-74386062	ENSMUSG00000026177	18173	P41251	Slc11a1	solute carrier family 11 (proton-coupled divalent metal ion transporters), member 1 [Source:MGI Symbol;Acc:MGI:1345275]	9.58086	11.9302	8.48058	5.7733	7.5344	5.61906	0.54701	1.3956	0.76544	1.04945
ENSMUSG00000032812	1.18558	1.58588e-07	3.57262e-05	up	7:+:101348067-101412586	7:+:101348067-101412586	ENSMUSG00000032812	69710	Q4LDD4	Arap1	Arf-GAP with Rho-GAP domain, ANK repeat and PH domain-containing protein 1 [Source:UniProtKB/Swiss-Prot;Acc:Q4LDD4]	13.8202	14.944	12.7859	9.87169	11.2932	11.0252	4.13484	5.3987	3.6843	4.75201
ENSMUSG00000034768	-1.66934971242894	1.62132e-07	3.62458e-05	down	11:+:102268743-102279462	11:+:102268743-102279462	ENSMUSG00000034768	217217	Q8VHS5	Asb16	Ankyrin repeat and SOCS box protein 16 [Source:UniProtKB/Swiss-Prot;Acc:Q8VHS5]	10.2708	6.92781	10.2508	11.9522	12.6756	12.8563	26.4856	28.1461	32.2978	24.6617
ENSMUSG00000112041	-2.32490540585822	1.57686e-07	3.57262e-05	down	12:-:11185993-11204502	12:-:11185993-11204502	ENSMUSG00000112041	77442	-	9530020I12Rik	RIKEN cDNA 9530020I12 gene	0.66702	0.70938	1.17851	1.34994	1.73847	0.71175	3.93612	3.14733	2.92482	4.17355
ENSMUSG00000015947	4.00473	1.40378e-07	3.36975e-05	up	3:-:96282909-96293969	3:-:96282909-96293969	ENSMUSG00000015947	14129	P26151	Fcgr1	High affinity immunoglobulin gamma Fc receptor I [Source:UniProtKB/Swiss-Prot;Acc:P26151]	15.7703	18.6764	13.4757	6.69885	10.9216	9.94513	0.52187	0.51147	0.51118	0.60557
ENSMUSG00000024610	2.81818	1.67015e-07	3.68611e-05	up	18:+:60803848-60812646	18:+:60803848-60812646	ENSMUSG00000024610	16149	Q545Y5	Cd74	CD74 antigen (invariant polypeptide of major histocompatibility complex, class II antigen-associated)	162.468	144.462	88.6958	169.105	215.6	223.223	14.1156	32.6913	13.4535	21.705
ENSMUSG00000031375	1.74849	1.4836e-07	3.4759e-05	up	X:+:73483602-73495933	X:+:73483602-73495933	ENSMUSG00000031375	12111	P28653	Bgn	biglycan [Source:MGI Symbol;Acc:MGI:88158]	224.663	216.881	166.231	130.818	144.648	188.29	39.8754	64.4632	41.7664	51.4846
ENSMUSG00000040229	2.55564	1.67402e-07	3.68611e-05	up	X:+:13632089-13640858	X:+:13632089-13640858	ENSMUSG00000040229	23890	Q9R1K6	Gpr34	Probable G-protein coupled receptor 34 [Source:UniProtKB/Swiss-Prot;Acc:Q9R1K6]	9.59768	12.1371	6.01846	6.60786	7.77207	8.58106	0.82051	1.50854	0.69354	1.14024
ENSMUSG00000033192	2.29881	1.79288e-07	3.77742e-05	up	8:+:92855339-92919279	8:+:92855339-92919279	ENSMUSG00000033192	270084	Q8BYI6	Lpcat2	Lysophosphatidylcholine acyltransferase 2 [Source:UniProtKB/Swiss-Prot;Acc:Q8BYI6]	6.99985	7.20322	4.85857	4.05732	5.16736	5.40186	0.61353	0.65142	0.81846	1.22168
ENSMUSG00000020097	1.40725	1.7926e-07	3.77742e-05	up	10:-:61098642-61147703	10:-:61098642-61147703	ENSMUSG00000020097	20397	Q8R0X7	Sgpl1	Sphingosine-1-phosphate lyase 1 [Source:UniProtKB/Swiss-Prot;Acc:Q8R0X7]	23.0725	25.6332	20.9397	15.7162	17.3639	19.062	5.69315	7.91421	4.74996	7.61582
ENSMUSG00000020901	3.14916	1.71387e-07	3.74569e-05	up	11:+:68432121-68497849	11:+:68432121-68497849	ENSMUSG00000020901	320207	Q5SW28	Pik3r5	Phosphoinositide 3-kinase regulatory subunit 5 [Source:UniProtKB/Swiss-Prot;Acc:Q5SW28]	4.71226	5.68353	4.78464	3.87722	3.90237	2.39995	0.21535	0.55672	0.21575	0.46329
ENSMUSG00000078771	2.68654	1.829e-07	3.79888e-05	up	11:-:79526560-79530609	11:-:79526560-79530609	ENSMUSG00000078771	14017	P20934	Evi2a	Protein EVI2A [Source:UniProtKB/Swiss-Prot;Acc:P20934]	11.8942	14.5922	8.83385	6.43184	8.45981	7.80776	0.95018	1.64712	0.82309	0.92827
ENSMUSG00000022748	-1.50446407488799	2.01855e-07	3.96747e-05	down	16:-:57302199-57606825	16:-:57302199-57606825	ENSMUSG00000022748	66497	Q9CZT6	Cmss1	cms small ribosomal subunit 1	8.46378	8.00308	10.1858	8.84088	8.40968	10.3752	21.4569	18.5781	20.6006	15.6446
ENSMUSG00000002228	-1.48065662517225	1.96826e-07	3.94075e-05	down	3:+:104781056-104786018	3:+:104781056-104786018	ENSMUSG00000002228	71887	Q149T7	Ppm1j	Protein phosphatase 1J [Source:UniProtKB/Swiss-Prot;Acc:Q149T7]	6.63478	6.16848	10.4726	8.67555	9.48523	8.29671	17.618	18.0759	17.3362	17.597
ENSMUSG00000050122	-2.57299205902987	1.427e-07	3.37479e-05	down	1:+:37026596-37187613	1:+:37026596-37187613	ENSMUSG00000050122	70853	A0A0A6YXU0,A0A0A6YWT6,Q8BH17,Q9D5X0,Q8C5X5,J9JI28,I6L9D7,Q810N7	Vwa3b	von Willebrand factor A domain containing 3B [Source:MGI Symbol;Acc:MGI:1918103]	0.22629	0.20681	0.37482	0.20275	0.23457	0.11684	0.88765	0.81953	1.00629	0.90821
ENSMUSG00000040794	-1.75517762407364	2.06123e-07	4.02435e-05	down	2:+:90885860-90890525	2:+:90885860-90890525	ENSMUSG00000040794	67445	Q8R066	C1qtnf4	Complement C1q tumor necrosis factor-related protein 4 [Source:UniProtKB/Swiss-Prot;Acc:Q8R066]	3.34614	3.06145	4.85535	3.23662	2.75158	3.53664	8.25814	7.13669	8.84257	9.43128
ENSMUSG00000036908	1.85044	1.94365e-07	3.93629e-05	up	19:+:3935186-3949340	19:+:3935186-3949340	ENSMUSG00000036908	54445	Q8VCW4	Unc93b1	unc-93 homolog B1 (C. elegans) [Source:MGI Symbol;Acc:MGI:1859307]	59.4699	64.5328	39.2828	34.2991	41.9924	37.8763	9.52982	14.7821	7.56437	10.7281
ENSMUSG00000060036	1.24309	1.76172e-07	3.77742e-05	up	15:-:80077791-80091868	15:-:80077791-80091868	ENSMUSG00000060036	27367	P27659	Rpl3	60S ribosomal protein L3 [Source:UniProtKB/Swiss-Prot;Acc:P27659]	191.231	217.613	159.823	139.192	152.99	164.686	65.7798	88.4587	51.4296	70.1004
ENSMUSG00000073489	2.13519	2.20109e-07	4.18771e-05	up	1:-:173747293-173766943	1:-:173747293-173766943	ENSMUSG00000073489	15951	P15092	Ifi204	Interferon-activable protein 204 [Source:UniProtKB/Swiss-Prot;Acc:P0DOV2]	8.92725	8.36042	7.61701	11.292	12.0289	11.5895	1.0507	2.31971	1.32733	2.18378
ENSMUSG00000031782	-1.0745684808813	1.81272e-07	3.79194e-05	down	8:+:94838321-94854895	8:+:94838321-94854895	ENSMUSG00000031782	67914	Q8K1Z0	Coq9	Ubiquinone biosynthesis protein COQ9, mitochondrial [Source:UniProtKB/Swiss-Prot;Acc:Q8K1Z0]	50.6497	40.3065	59.5071	57.338	56.4396	50.174	107.793	102.233	103.269	91.4729
ENSMUSG00000043832	3.0716	1.94892e-07	3.93629e-05	up	6:+:122952515-122969875	6:+:122952515-122969875	ENSMUSG00000043832	73149	Q8JZX6	Clec4a3	C-type lectin domain family 4, member a3 [Source:MGI Symbol;Acc:MGI:1920399]	18.7517	21.6339	14.394	10.1652	14.689	17.9015	0.70489	2.75607	1.09231	1.65408
ENSMUSG00000030789	4.83925	1.30195e-07	3.33659e-05	up	7:+:128129547-128150657	7:+:128129547-128150657	ENSMUSG00000030789	16411	Q9QXH4	Itgax	Integrin alpha-X [Source:UniProtKB/Swiss-Prot;Acc:Q9QXH4]	8.87084	8.98152	6.97296	4.61397	4.62203	6.60547	0.22721	0.39386	0.05249	0.14363
ENSMUSG00000029994	1.35459	2.2164e-07	4.18771e-05	up	6:-:86736840-86793584	6:-:86736840-86793584	ENSMUSG00000029994	11746	P97429	Anxa4	Mus musculus annexin A4 (Anxa4), transcript variant 1, mRNA. [Source:RefSeq mRNA;Acc:NM_001331120]	17.2847	18.9883	14.398	11.9065	12.2654	14.0216	4.57568	5.55228	3.54115	4.95495
ENSMUSG00000025216	-1.12769880577171	2.20382e-07	4.18771e-05	down	19:-:45232684-45235812	19:-:45232684-45235812	ENSMUSG00000025216	16814	P52955	Lbx1	Transcription factor LBX1 [Source:UniProtKB/Swiss-Prot;Acc:P52955]	11.2033	10.2731	11.5447	10.0334	11.8434	10.0066	19.5186	19.2928	22.0474	15.653
ENSMUSG00000031129	1.48686	2.41379e-07	4.39968e-05	up	9:+:94669909-95230445	9:+:94669909-95230445	ENSMUSG00000031129	331004	Q8BZ00	Slc9a9	Sodium/hydrogen exchanger 9 [Source:UniProtKB/Swiss-Prot;Acc:Q8BZ00]	5.81242	7.16815	4.87649	4.07192	5.07438	5.15256	1.21702	1.68774	1.08754	1.77792
ENSMUSG00000026414	2.94559	2.36334e-07	4.39968e-05	up	1:+:135836354-135852260	1:+:135836354-135852260	ENSMUSG00000026414	21956	Q54AB6	Tnnt2	Troponin T, cardiac muscle [Source:UniProtKB/Swiss-Prot;Acc:P50752]	35.4142	24.813	16.874	11.3935	14.2566	25.1984	2.24569	1.91156	1.87797	2.45125
ENSMUSG00000020473	1.16047	2.14769e-07	4.16537e-05	up	11:+:5861947-5872088	11:+:5861947-5872088	ENSMUSG00000020473	11568	Q640N1	Aebp1	Adipocyte enhancer-binding protein 1 [Source:UniProtKB/Swiss-Prot;Acc:Q640N1]	57.9783	54.0005	42.8855	46.4742	44.921	54.0681	18.6068	23.5571	14.2257	23.3667
ENSMUSG00000025932	-1.29352655654877	2.47169e-07	4.39968e-05	down	1:-:14168954-14310235	1:-:14168954-14310235	ENSMUSG00000025932	14048	P97767	Eya1	Eyes absent homolog 1 [Source:UniProtKB/Swiss-Prot;Acc:P97767]	1.77557	1.33583	1.5911	1.79343	2.2576	1.66561	2.90844	3.56957	3.03485	3.38947
ENSMUSG00000048126	1.0766	1.8957e-07	3.88235e-05	up	1:-:90765923-90843971	1:-:90765923-90843971	ENSMUSG00000048126	12835	Q9Z0I9	Col6a3	collagen, type VI, alpha 3 [Source:MGI Symbol;Acc:MGI:88461]	160.846	141.501	121.991	127.443	127.545	138.523	52.7738	76.3559	57.8642	64.8205
ENSMUSG00000101304	-2.8182472131406	1.85912e-07	3.83425e-05	down	9:-:50488795-50507823	9:-:50488795-50507823	ENSMUSG00000101304	69631	-	Plet1os	placenta expressed transcript 1, opposite strand	1.06052	0.61002	0.83155	0.8771	1.11142	1.22149	6.59487	4.65964	4.65702	3.22381
ENSMUSG00000030401	-1.17367420580487	2.01265e-07	3.96747e-05	down	7:+:19282624-19296160	7:+:19282624-19296160	ENSMUSG00000030401	20167	O70622	Rtn2	reticulon 2 (Z-band associated protein) [Source:MGI Symbol;Acc:MGI:107612]	56.7858	48.3127	69.2403	61.1804	62.7465	62.15	145.402	117.642	122.703	115.058
ENSMUSG00000001473	1.8656	2.17083e-07	4.18256e-05	up	18:+:67390717-67402748	18:+:67390717-67402748	ENSMUSG00000001473	67951	Q3UMM1	Tubb6	tubulin, beta 6 class V	298.135	277.25	200.367	128.688	144.737	198.507	53.4743	49.9217	47.9208	45.4019
ENSMUSG00000029919	2.57686	2.55683e-07	4.42182e-05	up	6:-:65117293-65144908	6:-:65117293-65144908	ENSMUSG00000029919	54486	Q9JHF7	Hpgds	Hematopoietic prostaglandin D synthase [Source:UniProtKB/Swiss-Prot;Acc:Q9JHF7]	4.97156	6.03641	3.90745	3.12925	4.26047	3.78709	0.24264	0.86366	0.43159	0.80039
ENSMUSG00000042529	-1.38788204157221	2.52313e-07	4.42182e-05	down	11:+:61022564-61071131	11:+:61022564-61071131	ENSMUSG00000042529	16515	P52187	Kcnj12	ATP-sensitive inward rectifier potassium channel 12 [Source:UniProtKB/Swiss-Prot;Acc:P52187]	7.68203	4.65812	5.53401	6.2833	6.60683	5.47281	14.7016	12.5656	10.8626	10.7638
ENSMUSG00000024781	1.45521	2.46136e-07	4.39968e-05	up	19:-:34492318-34527474	19:-:34492318-34527474	ENSMUSG00000024781	16889	Q9Z0M5	Lipa	lysosomal acid lipase A	30.6851	37.6029	26.3264	21.0077	25.3493	23.5264	7.05364	9.89714	6.30429	9.01937
ENSMUSG00000002781	-1.1877819270486	2.47882e-07	4.39968e-05	down	7:+:45896941-45917413	7:+:45896941-45917413	ENSMUSG00000002781	70209	G3X9F4	Tmem143	transmembrane protein 143 [Source:HGNC Symbol;Acc:HGNC:25603]	4.0056	3.62329	4.7302	4.18661	4.32926	3.05515	8.01814	7.62422	7.27624	6.3564
ENSMUSG00000022235	-1.57834232128246	2.56679e-07	4.42182e-05	down	15:+:31565389-31590119	15:+:31565389-31590119	ENSMUSG00000022235	69574	Q8R1G2	Cmbl	Carboxymethylenebutenolidase homolog [Source:UniProtKB/Swiss-Prot;Acc:Q8R1G2]	14.9424	10.4535	15.7036	13.8032	11.8295	16.7189	42.9886	31.1743	29.3422	28.538
ENSMUSG00000051375	-1.00217695184755	2.4584e-07	4.39968e-05	down	18:-:38185914-38212053	18:-:38185914-38212053	ENSMUSG00000051375	75599	Q8CFX3	Pcdh1	protocadherin 1 [Source:HGNC Symbol;Acc:HGNC:8655]	4.40459	4.35121	5.12518	5.30846	4.45894	4.84638	8.68953	8.30774	7.14966	7.24299
ENSMUSG00000018927	3.07187	2.68196e-07	4.5665e-05	up	11:-:83587882-83593087	11:-:83587882-83593087	ENSMUSG00000018927	20305	P27784	Ccl6	C-C motif chemokine 6 CCL6(22-95) CCL6(23-95) [Source:UniProtKB/Swiss-Prot;Acc:P27784]	46.4541	93.7322	70.2198	48.2385	43.6716	47.9992	2.63448	11.8034	3.37052	7.12729
ENSMUSG00000087523	-1.80070757684145	2.74237e-07	4.60229e-05	down	11:-:70654741-70656493	11:-:70654741-70656493	ENSMUSG00000087523	-	-	Gm12319	predicted gene 12319 [Source:MGI Symbol;Acc:MGI:3649749]	23.7555	17.7282	29.2893	31.1276	37.4114	34.5192	80.6417	69.9457	75.2023	69.5641
ENSMUSG00000023169	1.49227	2.75012e-07	4.60229e-05	up	15:-:96571418-96642913	15:-:96571418-96642913	ENSMUSG00000023169	105727	Q8K2P7	Slc38a1	solute carrier family 38, member 1	2.45723	2.30892	2.26444	1.82611	2.68765	2.04757	0.48239	0.81949	0.41317	0.83322
ENSMUSG00000030223	1.91309	2.58985e-07	4.43546e-05	up	6:+:137252319-137463233	6:+:137252319-137463233	ENSMUSG00000030223	19277	E9Q612	Ptpro	Receptor-type tyrosine-protein phosphatase O [Source:UniProtKB/Swiss-Prot;Acc:E9Q612]	2.2283	2.28193	1.63229	1.5096	1.52127	1.92662	0.27053	0.44083	0.33747	0.33581
ENSMUSG00000023067	2.00072	2.46601e-07	4.39968e-05	up	17:+:29090979-29100722	17:+:29090979-29100722	ENSMUSG00000023067	12575	Q564P6	Cdkn1a	Cyclin-dependent kinase inhibitor 1 [Source:UniProtKB/Swiss-Prot;Acc:P39689]	184.673	141.054	95.9363	82.0341	78.0504	111.862	19.496	26.3802	22.1696	28.8599
ENSMUSG00000001604	-1.47928842789267	2.49503e-07	4.40177e-05	down	4:+:136247729-136274898	4:+:136247729-136274898	ENSMUSG00000001604	21401	P23881	Tcea3	Transcription elongation factor A protein 3 [Source:UniProtKB/Swiss-Prot;Acc:P23881]	34.4234	30.1259	51.9855	45.9277	53.8876	40.5285	98.6609	99.4951	110.378	95.5031
ENSMUSG00000037710	-1.01408881797777	2.71893e-07	4.60229e-05	down	10:-:71330480-71344954	10:-:71330480-71344954	ENSMUSG00000037710	52637	Q91WS0	Cisd1	CDGSH iron-sulfur domain-containing protein 1 [Source:UniProtKB/Swiss-Prot;Acc:Q91WS0]	45.0204	34.751	34.8116	30.4581	34.9093	36.3305	66.2517	63.5806	53.894	55.7129
ENSMUSG00000032020	1.57358	3.03476e-07	4.75738e-05	up	9:-:41011098-41161697	9:-:41011098-41161697	ENSMUSG00000032020	72828	Q8BGG7	Ubash3b	ubiquitin associated and SH3 domain containing, B [Source:MGI Symbol;Acc:MGI:1920078]	3.4174	4.20203	3.22905	2.30599	2.92349	2.82743	0.58875	0.99845	0.64518	0.88172
ENSMUSG00000036611	-1.2083800308121	2.76782e-07	4.60558e-05	down	9:+:25481547-25604110	9:+:25481547-25604110	ENSMUSG00000036611	67484	Q3TGW2	Eepd1	Endonuclease/exonuclease/phosphatase family domain-containing protein 1 [Source:UniProtKB/Swiss-Prot;Acc:Q3TGW2]	10.0527	8.12523	11.9577	10.3519	12.3398	10.5594	19.4938	20.9689	20.4632	17.6067
ENSMUSG00000047604	-1.42840906762061	2.97381e-07	4.73069e-05	down	19:-:41845972-41848132	19:-:41845972-41848132	ENSMUSG00000047604	212398	Q8K025	Frat2	GSK-3-binding protein FRAT2 [Source:UniProtKB/Swiss-Prot;Acc:Q8K025]	6.67389	5.29513	7.09026	6.42048	5.42874	6.38208	15.7749	13.5101	12.3943	9.98303
ENSMUSG00000028982	-1.26847051749675	3.12723e-07	4.79498e-05	down	4:-:149744036-149774277	4:-:149744036-149774277	ENSMUSG00000028982	70556	Q3TZX3	Slc25a33	Solute carrier family 25 member 33 [Source:UniProtKB/Swiss-Prot;Acc:Q3TZX3]	3.98295	4.10528	4.33421	3.7785	3.28386	4.02956	7.4355	6.34915	6.71296	6.94597
ENSMUSG00000006717	-1.10073684537162	2.92349e-07	4.70425e-05	down	13:-:24817948-24831540	13:-:24817948-24831540	ENSMUSG00000006717	66834	Q4VA32	Acot13	acyl-CoA thioesterase 13 [Source:MGI Symbol;Acc:MGI:1914084]	44.6396	43.8264	55.0337	42.3913	41.4015	49.8319	88.6353	92.043	74.6264	69.3722
ENSMUSG00000043126	-1.64000687682812	3.18083e-07	4.82662e-05	down	10:-:61473576-61476937	10:-:61473576-61476937	ENSMUSG00000043126	320949	Q8BG14	D830039M14Rik	RIKEN cDNA D830039M14 gene	1.13287	1.06926	1.33951	0.91709	1.05578	0.7331	2.21033	2.06314	2.45563	2.369
ENSMUSG00000013707	2.46087	3.07371e-07	4.75738e-05	up	3:-:95139521-95142360	3:-:95139521-95142360	ENSMUSG00000013707	69769	Q9D8Y7	Tnfaip8l2	Tumor necrosis factor alpha-induced protein 8-like protein 2 [Source:UniProtKB/Swiss-Prot;Acc:Q9D8Y7]	18.7832	19.9007	12.3642	9.389	12.2253	12.8996	1.8063	1.96702	1.29189	2.17987
ENSMUSG00000063142	-1.32219429320353	3.16573e-07	4.82662e-05	down	14:-:23289431-24014491	14:-:23289431-24014491	ENSMUSG00000063142	16531	Q08460	Kcnma1	potassium large conductance calcium-activated channel, subfamily M, alpha member 1 [Source:MGI Symbol;Acc:MGI:99923]	1.41196	1.05582	1.68317	1.44543	1.39985	1.2696	2.6785	2.59271	3.18895	2.53424
ENSMUSG00000074217	-1.89454177112811	2.98838e-07	4.73069e-05	down	8:-:84010222-84012171	8:-:84010222-84012171	ENSMUSG00000074217	70134	Q9CVC4	2210011C24Rik	RIKEN cDNA 2210011C24 gene [Source:MGI Symbol;Acc:MGI:1917384]	1.76104	1.11082	0.98911	1.77293	1.53278	1.74428	3.64092	3.65936	3.3451	4.57145
ENSMUSG00000022525	-1.64462526283157	3.41572e-07	5.07781e-05	down	16:+:29209695-29230531	16:+:29209695-29230531	ENSMUSG00000022525	27281	A0A0R4J130	Hrasls	Mus musculus HRAS-like suppressor (Hrasls), transcript variant 2, mRNA. [Source:RefSeq mRNA;Acc:NM_001357092]	1.86996	1.72573	2.09512	2.28711	2.65473	3.39917	5.50339	5.10444	4.96732	5.5728
ENSMUSG00000021190	2.13239	2.89988e-07	4.69204e-05	up	12:-:102394084-102439813	12:-:102394084-102439813	ENSMUSG00000021190	19141	A2RTI3	Lgmn	legumain [Source:MGI Symbol;Acc:MGI:1330838]	247.727	317.26	231.522	119.15	150.443	141.111	41.4743	42.8886	34.9698	39.928
ENSMUSG00000042045	1.68436	3.1978e-07	4.82735e-05	up	9:+:53850164-53854560	9:+:53850164-53854560	ENSMUSG00000042045	66402	Q9CQD6	Sln	Sarcolipin [Source:UniProtKB/Swiss-Prot;Acc:Q9CQD6]	111.737	114.901	145.315	123.449	96.5415	130.741	29.2949	29.9019	20.0349	54.1008
ENSMUSG00000079227	4.85024	2.45519e-07	4.39968e-05	up	9:+:124121543-124147699	9:+:124121543-124147699	ENSMUSG00000079227	12774	P51682	Ccr5	C-C chemokine receptor type 5 [Source:UniProtKB/Swiss-Prot;Acc:P51682]	5.2023	7.25798	4.02006	2.75704	3.07442	2.90987	0.10475	0.11962	0.07472	0.09666
ENSMUSG00000027035	1.56575	3.74116e-07	5.42394e-05	up	2:+:68861441-69114282	2:+:68861441-69114282	ENSMUSG00000027035	241447	Q8C172	Cers6	Ceramide synthase 6 [Source:UniProtKB/Swiss-Prot;Acc:Q8C172]	3.9825	3.34312	2.49632	2.30882	2.92843	3.20252	0.59724	0.95207	0.63909	0.84089
ENSMUSG00000002500	-1.6845703337099	2.97376e-07	4.73069e-05	down	17:+:24727820-24736143	17:+:24727820-24736143	ENSMUSG00000002500	66211	Q9CQ09	Rpl3l	ribosomal protein L3-like [Source:MGI Symbol;Acc:MGI:1913461]	71.0895	57.9661	123.722	100.828	116.112	77.0798	264.922	255.491	270.805	243.6
ENSMUSG00000027639	1.22214	3.38289e-07	5.05465e-05	up	2:-:157097533-157135265	2:-:157097533-157135265	ENSMUSG00000027639	56045	E9Q0K6	Samhd1	SAM and HD domain containing deoxynucleoside triphosphate triphosphohydrolase 1 [Source:HGNC Symbol;Acc:HGNC:15925]	10.2953	10.5967	9.1138	10.3688	13.9325	10.6312	3.41328	5.017	2.98234	4.03694
ENSMUSG00000027750	1.97905	2.78466e-07	4.60744e-05	up	3:+:54361109-54391037	3:+:54361109-54391037	ENSMUSG00000027750	50706	Q62009	Postn	periostin, osteoblast specific factor [Source:MGI Symbol;Acc:MGI:1926321]	440.856	433.285	288.079	321.726	345.76	458.05	75.7214	140.397	77.9406	118.328
ENSMUSG00000045316	-1.03503115441948	3.70832e-07	5.40308e-05	down	17:-:24848896-24850302	17:-:24848896-24850302	ENSMUSG00000045316	68636	Q8R0F8	Fahd1	fumarylacetoacetate hydrolase domain containing 1	17.6133	14.7541	14.716	14.1982	13.8538	16.4364	27.8481	25.5903	23.5603	21.6175
ENSMUSG00000071711	-1.00872556302197	3.70174e-07	5.40308e-05	down	15:+:78406416-78414013	15:+:78406416-78414013	ENSMUSG00000071711	246221	Q3UW66	Mpst	mercaptopyruvate sulfurtransferase	10.8769	10.3957	9.85515	13.0088	10.8364	10.0818	16.2712	19.126	17.8802	15.5685
ENSMUSG00000040705	-1.69821710022697	3.99846e-07	5.57694e-05	down	7:-:19417466-19421417	7:-:19417466-19421417	ENSMUSG00000040705	100503495	Q9D1Z4	A930016O22Rik	RIKEN cDNA A930016O22 gene	3.39212	2.74915	2.54774	3.26191	4.93513	2.23279	7.99787	6.77371	5.83442	9.35798
ENSMUSG00000032089	2.78638	4.05679e-07	5.60411e-05	up	9:-:45253837-45269149	9:-:45253837-45269149	ENSMUSG00000032089	16154	Q3UDV8	Il10ra	Interleukin-10 receptor subunit alpha [Source:UniProtKB/Swiss-Prot;Acc:Q61727]	13.2401	14.3153	6.80712	6.48221	8.9262	7.63061	0.71308	0.90133	1.04496	1.25498
ENSMUSG00000027314	-1.33780125384661	3.97427e-07	5.57694e-05	down	2:+:119325784-119335962	2:+:119325784-119335962	ENSMUSG00000027314	54485	Q9JI71	Dll4	Delta-like protein 4 [Source:UniProtKB/Swiss-Prot;Acc:Q9JI71]	2.99264	2.82602	3.53423	4.46907	3.88895	4.01603	7.10956	7.59566	6.20073	6.72392
ENSMUSG00000008496	2.43089	3.51566e-07	5.19997e-05	up	7:-:25087344-25179726	7:-:25087344-25179726	ENSMUSG00000008496	18987	Q00196	Pou2f2	POU domain, class 2, transcription factor 2 [Source:UniProtKB/Swiss-Prot;Acc:Q00196]	1.32455	1.941	1.06127	1.28578	1.70055	1.09422	0.19543	0.22949	0.11468	0.18259
ENSMUSG00000024962	-1.04258368597912	3.86929e-07	5.55471e-05	down	19:-:6982473-6987651	19:-:6982473-6987651	ENSMUSG00000024962	22340	P49766	Vegfb	vascular endothelial growth factor B [Source:MGI Symbol;Acc:MGI:106199]	21.4838	19.6533	22.5116	22.332	22.3778	22.3155	32.0537	43.9239	40.1297	31.5715
ENSMUSG00000042734	1.00201	3.94049e-07	5.57694e-05	up	12:+:81631249-81667557	12:+:81631249-81667557	ENSMUSG00000042734	69480	Q3V038	Ttc9	tetratricopeptide repeat domain 9	14.6672	13.2673	12.1338	14.6134	14.2031	14.3666	5.67731	4.81704	5.28917	6.47082
ENSMUSG00000003283	2.49	4.01135e-07	5.57694e-05	up	2:+:153108468-153151441	2:+:153108468-153151441	ENSMUSG00000003283	15162	P08103	Hck	Tyrosine-protein kinase HCK [Source:UniProtKB/Swiss-Prot;Acc:P08103]	9.10301	10.4797	6.60655	4.85136	6.03916	5.79044	0.79489	1.11525	0.6025	1.07919
ENSMUSG00000020100	1.13359	4.35247e-07	5.79712e-05	up	10:-:60712072-60752794	10:-:60712072-60752794	ENSMUSG00000020100	71279	Q99P65	Slc29a3	Equilibrative nucleoside transporter 3 [Source:UniProtKB/Swiss-Prot;Acc:Q99P65]	5.68411	5.84947	5.07522	4.33809	6.24921	5.59993	1.58552	2.32384	1.62037	2.07467
ENSMUSG00000040747	2.6935	4.55281e-07	5.79712e-05	up	3:-:106759921-106790149	3:-:106759921-106790149	ENSMUSG00000040747	12508	Q3U0W1	Cd53	Leukocyte surface antigen CD53 [Source:UniProtKB/Swiss-Prot;Acc:Q61451]	29.6184	47.9868	28.2293	21.9032	27.0071	19.8982	2.38649	5.42971	1.66418	4.96809
ENSMUSG00000034641	2.34801	4.19847e-07	5.76903e-05	up	11:-:114982274-114989922	11:-:114982274-114989922	ENSMUSG00000034641	217305	Q8VCH2	Cd300ld	CMRF35-like molecule 5 [Source:UniProtKB/Swiss-Prot;Acc:Q8VCH2]	6.87342	7.79097	5.51885	3.9585	4.52633	4.67894	0.58941	0.85824	0.52419	1.20921
ENSMUSG00000020143	2.2615	4.54515e-07	5.79712e-05	up	11:-:34226815-34783892	11:-:34226815-34783892	ENSMUSG00000020143	94176	Q6A0A3	Dock2	Dedicator of cytokinesis protein 2 [Source:UniProtKB/Swiss-Prot;Acc:Q8C3J5]	4.35597	5.2072	4.18187	2.74929	4.79186	2.84575	0.38207	1.07625	0.43577	0.81239
ENSMUSG00000014361	1.36176	4.49364e-07	5.79712e-05	up	2:+:128698956-128802894	2:+:128698956-128802894	ENSMUSG00000014361	17289	Q60805	Mertk	Tyrosine-protein kinase Mer [Source:UniProtKB/Swiss-Prot;Acc:Q60805]	11.22	10.4393	7.71202	7.73303	7.78382	7.69182	2.46886	3.22848	1.78774	3.05177
ENSMUSG00000022146	1.23341	4.39833e-07	5.79712e-05	up	15:-:6813577-6874969	15:-:6813577-6874969	ENSMUSG00000022146	18414	Q3TRK8	Osmr	oncostatin M receptor [Source:MGI Symbol;Acc:MGI:1330819]	3.41681	5.1915	4.39305	4.94234	4.17202	4.05648	1.19265	1.61898	1.40996	1.61015
ENSMUSG00000099398	3.34452	3.07745e-07	4.75738e-05	up	19:-:11301249-11314454	19:-:11301249-11314454	ENSMUSG00000099398	383435	A0A087WSD2	Ms4a14	membrane-spanning 4-domains, subfamily A, member 14	3.43548	3.81139	2.35579	2.35448	2.93038	2.81227	0.06392	0.2482	0.26356	0.38569
ENSMUSG00000044042	2.64948	3.31012e-07	4.97129e-05	up	2:+:113327736-113716767	2:+:113327736-113716767	ENSMUSG00000044042	14260	Q05860	Fmn1	Formin-1 [Source:UniProtKB/Swiss-Prot;Acc:Q05860]	0.71241	0.76949	0.66902	0.44222	0.49233	0.4632	0.0405	0.09829	0.05321	0.07739
ENSMUSG00000046345	-2.05223767103395	4.73259e-07	5.89781e-05	down	16:+:32271468-32274779	16:+:32271468-32274779	ENSMUSG00000046345	69576	Q8CEZ1	Smco1	Single-pass membrane and coiled-coil domain-containing protein 1 [Source:UniProtKB/Swiss-Prot;Acc:Q8CEZ1]	3.53459	2.37336	3.82345	5.70264	6.3238	6.92742	12.9177	14.4655	14.0545	13.8967
ENSMUSG00000045776	-1.46380583617231	4.25497e-07	5.76903e-05	down	14:+:29018208-29033645	14:+:29018208-29033645	ENSMUSG00000045776	319476	Q8BXQ3	Lrtm1	leucine-rich repeats and transmembrane domains 1	4.11941	2.449	4.5902	3.70568	3.60712	4.37934	8.84317	7.83944	8.54948	8.45233
ENSMUSG00000097412	-1.31945556160402	4.78751e-07	5.94098e-05	down	10:+:86685525-86694806	10:+:86685525-86694806	ENSMUSG00000097412	66263	-	1810014B01Rik	RIKEN cDNA 1810014B01 gene	1.93403	2.74924	2.32273	2.25257	2.06437	2.41239	4.38927	3.66169	3.89727	4.46937
ENSMUSG00000030560	1.69582	4.2367e-07	5.76903e-05	up	7:+:88278085-88310888	7:+:88278085-88310888	ENSMUSG00000030560	13032	P97821	Ctsc	cathepsin C [Source:MGI Symbol;Acc:MGI:109553]	40.5614	54.7029	32.2721	26.2556	32.256	26.879	8.58045	10.9764	6.69496	10.8517
ENSMUSG00000022110	-1.02911568280041	3.82997e-07	5.52535e-05	down	14:+:73525319-73596142	14:+:73525319-73596142	ENSMUSG00000022110	20916	Q9Z2I9	Sucla2	Succinate--CoA ligase [ADP-forming] subunit beta, mitochondrial [Source:UniProtKB/Swiss-Prot;Acc:Q9Z2I9]	67.3367	67.4921	83.5773	95.3692	83.5292	88.982	163.377	152.314	147.093	152.348
ENSMUSG00000078202	-1.42832851977016	5.1394e-07	6.11839e-05	down	2:+:25180758-25183339	2:+:25180758-25183339	ENSMUSG00000078202	67122	Q91ZA8	Nrarp	Notch-regulated ankyrin repeat-containing protein [Source:UniProtKB/Swiss-Prot;Acc:Q91ZA8]	1.63244	1.54915	1.80431	1.84096	1.46792	1.48261	3.6831	3.05273	2.7337	2.84176
ENSMUSG00000049037	2.15778	5.19441e-07	6.15885e-05	up	6:+:122921848-122934619	6:+:122921848-122934619	ENSMUSG00000049037	269799	Q80UI7	Clec4a1	C-type lectin domain family 4, member a1 [Source:MGI Symbol;Acc:MGI:3036291]	16.8841	21.7411	13.5223	10.8432	15.2528	14.4731	1.30081	3.19737	2.46747	3.62271
ENSMUSG00000001029	-1.06109875824834	4.96161e-07	6.04928e-05	down	11:-:106377656-106388075	11:-:106377656-106388075	ENSMUSG00000001029	15896	P35330	Icam2	Intercellular adhesion molecule 2 [Source:UniProtKB/Swiss-Prot;Acc:P35330]	7.14798	10.3976	8.99883	8.50163	7.99416	8.53799	13.974	16.6916	11.8497	12.7468
ENSMUSG00000030089	-1.42206304715959	4.45729e-07	5.79712e-05	down	6:+:90604725-90646412	6:+:90604725-90646412	ENSMUSG00000030089	71699	Q921R8	Slc41a3	solute carrier family 41, member 3 [Source:MGI Symbol;Acc:MGI:1918949]	17.1485	13.0101	23.6502	20.5215	22.7957	19.5096	46.7354	46.8975	45.1825	37.2487
ENSMUSG00000049103	3.32038	5.31408e-07	6.25875e-05	up	9:+:124101950-124113557	9:+:124101950-124113557	ENSMUSG00000049103	12772	Q3TRK1	Ccr2	C-C chemokine receptor type 2 [Source:UniProtKB/Swiss-Prot;Acc:P51683]	12.568	17.7586	13.7832	6.76553	9.48702	6.62479	0.49198	1.68836	0.68988	0.70506
ENSMUSG00000031591	1.16594	4.64083e-07	5.8331e-05	up	8:-:41340197-41374773	8:-:41340197-41374773	ENSMUSG00000031591	11886	Q78P93	Asah1	Acid ceramidase Acid ceramidase subunit alpha Acid ceramidase subunit beta [Source:UniProtKB/Swiss-Prot;Acc:Q9WV54]	38.5739	43.0594	30.9208	26.9823	33.4704	32.6395	10.9297	16.4432	10.7267	13.8376
ENSMUSG00000003484	2.96435	4.00823e-07	5.57694e-05	up	8:-:71988482-72009626	8:-:71988482-72009626	ENSMUSG00000003484	72054	Q99N16	Cyp4f18	Leukotriene-B(4) omega-hydroxylase 2 [Source:UniProtKB/Swiss-Prot;Acc:Q99N16]	6.26913	7.97007	7.00414	4.32847	6.12967	5.56908	0.36418	1.05378	0.23782	0.98042
ENSMUSG00000020422	1.07701	4.67623e-07	5.85248e-05	up	11:-:8431652-8664535	11:-:8431652-8664535	ENSMUSG00000020422	319939	Q5SSZ5	Tns3	Tensin-3 [Source:UniProtKB/Swiss-Prot;Acc:Q5SSZ5]	11.7987	10.7268	10.2537	8.43286	8.95268	9.0276	3.37857	4.75945	3.09416	4.69423
ENSMUSG00000025190	-1.0398049150402	4.41639e-07	5.79712e-05	down	19:-:43499752-43524605	19:-:43499752-43524605	ENSMUSG00000025190	14718	P05201	Got1	glutamic-oxaloacetic transaminase 1, soluble [Source:MGI Symbol;Acc:MGI:95791]	39.5021	35.0972	51.4783	47.8154	43.6225	48.4743	78.9005	85.558	89.2331	76.5204
ENSMUSG00000072812	1.47083	5.33368e-07	6.25875e-05	up	12:-:112772194-112802657	12:-:112772194-112802657	ENSMUSG00000072812	100041194	F7CVJ5,Q3UUE0,E9PYB0,F7DBB3,Q3URZ6	Ahnak2	AHNAK nucleoprotein 2 [Source:MGI Symbol;Acc:MGI:2144831]	3.49953	3.39618	2.4451	2.72576	2.81204	2.98059	0.56505	0.81031	0.80985	1.2354
ENSMUSG00000021322	1.87886	4.98019e-07	6.04928e-05	up	13:+:20794113-21036617	13:+:20794113-21036617	ENSMUSG00000021322	27052	O35298	Aoah	acyloxyacyl hydrolase	1.49991	1.84582	1.33668	1.46357	1.94954	1.54886	0.21927	0.48956	0.24464	0.31753
ENSMUSG00000024696	3.41011	3.64612e-07	5.36584e-05	up	19:+:12798606-12833807	19:+:12798606-12833807	ENSMUSG00000024696	107321	Q99N69	Lpxn	leupaxin	8.88317	10.9123	8.25129	4.64022	6.46512	5.91709	0.55844	0.52704	0.48912	0.33697
ENSMUSG00000026100	-2.00876761944634	5.04237e-07	6.07699e-05	down	1:+:53061640-53068079	1:+:53061640-53068079	ENSMUSG00000026100	17700	O08689	Mstn	myostatin [Source:MGI Symbol;Acc:MGI:95691]	6.38303	4.8292	7.86502	9.07119	9.65254	11.3603	31.4293	18.9987	27.422	26.1517
ENSMUSG00000107585	-1.46115490956947	5.64085e-07	6.50386e-05	down	7:-:3421665-3423445	7:-:3421665-3423445	ENSMUSG00000107585	70230	-	3300002P13Rik	RIKEN cDNA 3300002P13 gene	6.32458	4.96117	6.63637	6.29404	7.107	5.81064	15.2757	12.7038	12.0041	9.93532
ENSMUSG00000060147	1.39615	4.61641e-07	5.82742e-05	up	13:-:33917918-34002794	13:-:33917918-34002794	ENSMUSG00000060147	20719	Q60854	Serpinb6a	serine (or cysteine) peptidase inhibitor, clade B, member 6a [Source:MGI Symbol;Acc:MGI:103123]	48.8768	52.2324	31.1692	50.8865	44.5567	49.5701	13.921	18.2911	12.2222	18.7478
ENSMUSG00000087380	-1.66428588322472	5.08196e-07	6.0996e-05	down	6:+:31220351-31337404	6:+:31220351-31337404	ENSMUSG00000087380	73652	-	2210408F21Rik	RIKEN cDNA 2210408F21 gene	0.84427	0.67341	0.90361	0.98781	1.00019	0.76284	1.98706	1.72975	1.70258	2.18949
ENSMUSG00000029610	-1.09567075226285	5.13809e-07	6.11839e-05	down	5:-:143902704-143909847	5:-:143902704-143909847	ENSMUSG00000029610	231872	Q8R010	Aimp2	Aminoacyl tRNA synthase complex-interacting multifunctional protein 2 [Source:UniProtKB/Swiss-Prot;Acc:Q8R010]	15.812	15.3671	15.961	16.9713	19.3506	17.2791	30.5386	28.0593	32.7301	24.4938
ENSMUSG00000037151	-1.17381509012931	4.93404e-07	6.04928e-05	down	10:+:61475801-61582791	10:+:61475801-61582791	ENSMUSG00000037151	216011	Q8CI70	Lrrc20	leucine rich repeat containing 20	18.8224	14.6259	21.9223	19.8336	23.5895	19.3714	41.172	35.45	41.0934	35.1396
ENSMUSG00000020846	-1.08078464295481	4.94183e-07	6.04928e-05	down	11:-:76019194-76027782	11:-:76019194-76027782	ENSMUSG00000020846	76566	Q5SVD0	Rflnb	Refilin-B [Source:UniProtKB/Swiss-Prot;Acc:Q5SVD0]	20.2726	19.1311	22.0497	28.697	22.9717	26.3543	42.1113	49.8065	37.4684	42.7849
ENSMUSG00000048612	1.75231	5.34278e-07	6.25875e-05	up	19:-:37899036-38043577	19:-:37899036-38043577	ENSMUSG00000048612	226101	Q69ZN7	Myof	myoferlin	11.8263	11.9318	10.3913	6.37605	7.77141	7.66438	1.86373	3.34223	1.75518	2.21932
ENSMUSG00000020120	2.61587	6.00859e-07	6.74205e-05	up	11:-:16971206-17052381	11:-:16971206-17052381	ENSMUSG00000020120	56193	Q9JHK5	Plek	pleckstrin [Source:MGI Symbol;Acc:MGI:1860485]	11.3655	19.2888	15.4506	8.1904	10.5276	9.59721	0.94989	2.72695	0.94125	1.9292
ENSMUSG00000026817	-1.14139414798047	4.41721e-07	5.79712e-05	down	2:+:32621758-32635058	2:+:32621758-32635058	ENSMUSG00000026817	11636	Q9R0Y5	Ak1	Adenylate kinase isoenzyme 1 [Source:UniProtKB/Swiss-Prot;Acc:Q9R0Y5]	204.737	153.418	212.804	207.914	219.046	217.08	517.274	402.32	441.978	379.181
ENSMUSG00000046818	-1.48868270752964	4.93224e-07	6.04928e-05	down	3:+:137621612-137628333	3:+:137621612-137628333	ENSMUSG00000046818	73284	B2RVG4	Ddit4l	DNA damage-inducible transcript 4-like protein [Source:UniProtKB/Swiss-Prot;Acc:Q8VHZ5]	26.8368	23.649	33.2843	38.0869	36.7241	37.6934	102.096	88.7254	84.4179	59.7667
ENSMUSG00000062082	5.32777	6.26848e-08	2.79232e-05	up	16:+:44811733-44839150	16:+:44811733-44839150	ENSMUSG00000062082	239849	Q6XJV4	Cd200r4	Cell surface glycoprotein CD200 receptor 4 [Source:UniProtKB/Swiss-Prot;Acc:Q6XJV4]	1.01814	1.18842	0.73406	0.65962	1.29443	1.10265	0.05082	0	0	0
ENSMUSG00000047246	-1.38050199286598	6.29241e-07	6.9278e-05	down	13:-:23583670-23621124	13:-:23583670-23621124	ENSMUSG00000047246	319179	Q6ZWY9	Hist1h2be	Histone H2B type 1-C/E/G [Source:UniProtKB/Swiss-Prot;Acc:Q6ZWY9]	1.03941	1.43491	1.29235	1.21361	1.52907	1.30923	2.50128	2.58128	2.69323	2.01709
ENSMUSG00000047180	1.9204	6.32457e-07	6.93713e-05	up	1:-:36264597-36274679	1:-:36264597-36274679	ENSMUSG00000047180	214854	Q8CJC5	Neurl3	E3 ubiquitin-protein ligase NEURL3 [Source:UniProtKB/Swiss-Prot;Acc:Q8CJC5]	11.2394	12.2133	10.7003	5.83042	8.07889	7.17237	1.46997	2.13653	1.46926	1.91044
ENSMUSG00000079508	-1.10557046024318	5.46419e-07	6.37032e-05	down	X:+:94367117-94417093	X:+:94367117-94417093	ENSMUSG00000079508	68316	Q9DCZ4	Apoo	MICOS complex subunit Mic26 [Source:UniProtKB/Swiss-Prot;Acc:Q9DCZ4]	35.2848	28.5232	41.5759	39.2573	36.1928	39.6119	74.9054	63.7605	60.4606	63.8125
ENSMUSG00000029108	1.13714	5.91575e-07	6.70767e-05	up	5:+:57717967-58133230	5:+:57717967-58133230	ENSMUSG00000029108	54216	A0A0A6YY83	Pcdh7	protocadherin 7 [Source:MGI Symbol;Acc:MGI:1860487]	5.02846	5.53874	4.61304	4.70673	4.09058	4.55955	1.21535	2.1467	1.72353	1.8866
ENSMUSG00000042961	-1.07140548413517	6.0028e-07	6.74205e-05	down	15:-:7206120-7398395	15:-:7206120-7398395	ENSMUSG00000042961	268780	Q4VBE4	Egflam	Pikachurin [Source:UniProtKB/Swiss-Prot;Acc:Q4VBE4]	2.89547	2.73797	3.39115	3.05379	2.74221	3.71816	5.1448	5.11998	4.64348	5.23549
ENSMUSG00000021665	1.75023	6.04102e-07	6.75257e-05	up	13:-:97176331-97198357	13:-:97176331-97198357	ENSMUSG00000021665	15212	Q3TXR9	Hexb	hexosaminidase B	42.0702	44.15	31.7752	24.1638	26.1984	28.9987	6.78883	11.8108	5.48877	7.40318
ENSMUSG00000055214	-2.17651944474828	6.11653e-07	6.81097e-05	down	1:-:175962306-176275312	1:-:175962306-176275312	ENSMUSG00000055214	319455	Q3UNN8	Pld5	Mus musculus phospholipase D family, member 5 (Pld5), transcript variant 3, mRNA. [Source:RefSeq mRNA;Acc:NM_001357844]	0.22136	0.11537	0.20513	0.23545	0.31589	0.2182	0.85975	0.56223	0.50572	0.81389
ENSMUSG00000031659	1.49223	5.76903e-07	6.62556e-05	up	8:+:88272403-88329962	8:+:88272403-88329962	ENSMUSG00000031659	11513	P51829	Adcy7	Adenylate cyclase type 7 [Source:UniProtKB/Swiss-Prot;Acc:P51829]	20.1004	23.1389	19.42	12.679	16.021	13.7856	4.0983	6.15305	4.32437	6.10086
ENSMUSG00000027423	1.00823	5.55382e-07	6.42882e-05	up	2:-:144250123-144270906	2:-:144250123-144270906	ENSMUSG00000027423	69178	Q9D8U8	Snx5	Sorting nexin-5 [Source:UniProtKB/Swiss-Prot;Acc:Q9D8U8]	52.8252	61.9897	41.9984	39.8909	45.5569	46.5267	20.2788	20.7875	19.418	23.707
ENSMUSG00000033590	-2.38899967048755	7.00135e-07	7.35461e-05	down	9:+:75232020-75305451	9:+:75232020-75305451	ENSMUSG00000033590	208943	E9Q1F5	Myo5c	myosin VC [Source:HGNC Symbol;Acc:HGNC:7604]	0.35611	0.17231	0.81673	0.66904	0.50874	0.50293	1.7363	1.69071	1.68326	1.89491
ENSMUSG00000069792	3.10696	6.7015e-07	7.13674e-05	up	11:+:83703991-83706268	11:+:83703991-83706268	ENSMUSG00000069792	100034251	Q5SSJ1	Wfdc17	WAP four-disulfide core domain 17 [Source:MGI Symbol;Acc:MGI:3649773]	47.0669	80.1749	35.1566	32.057	44.8108	38.1738	2.24243	7.80819	2.36479	4.58877
ENSMUSG00000026062	-1.37119196784471	6.24779e-07	6.90463e-05	down	1:+:40680574-40769273	1:+:40680574-40769273	ENSMUSG00000026062	226999	Q3ZAS0	Slc9a2	solute carrier family 9 (sodium/hydrogen exchanger), member 2 [Source:MGI Symbol;Acc:MGI:105075]	4.32641	3.54509	5.61811	5.81274	6.21084	4.60275	11.8158	11.1506	9.6644	9.32077
ENSMUSG00000021057	-1.94010143881129	6.65609e-07	7.11424e-05	down	12:+:76324891-76334153	12:+:76324891-76334153	ENSMUSG00000021057	238276	D3YVF0	Akap5	A-kinase anchor protein 5 [Source:UniProtKB/Swiss-Prot;Acc:D3YVF0]	0.20093	0.20775	0.24274	0.39535	0.44081	0.34581	0.71583	1.06266	0.66494	0.72602
ENSMUSG00000056515	1.19534	6.36505e-07	6.95548e-05	up	17:-:65651726-65772752	17:-:65651726-65772752	ENSMUSG00000056515	106572	Q3TXV4	Rab31	RAB31, member RAS oncogene family	32.9883	34.0118	28.7708	24.2081	23.1577	27.2005	9.05964	13.5693	7.72359	11.0596
ENSMUSG00000040287	-1.15630507038186	5.93214e-07	6.70767e-05	down	10:+:127501686-127508823	10:+:127501686-127508823	ENSMUSG00000040287	237611	Q8BZ71	Stac3	SH3 and cysteine-rich domain-containing protein 3 [Source:UniProtKB/Swiss-Prot;Acc:Q8BZ71]	38.8209	28.9296	42.1152	33.8475	36.4092	33.4683	93.6734	72.4053	64.7316	56.8931
ENSMUSG00000046169	1.47663	7.21834e-07	7.41928e-05	up	13:+:104287835-104496695	13:+:104287835-104496695	ENSMUSG00000046169	108154	D3Z1A5	Adamts6	a disintegrin-like and metallopeptidase (reprolysin type) with thrombospondin type 1 motif, 6	1.4327	1.68816	1.52012	1.20265	1.18039	1.37858	0.35319	0.34771	0.29903	0.38603
ENSMUSG00000023913	1.65706	7.19552e-07	7.41928e-05	up	17:+:43568098-43612201	17:+:43568098-43612201	ENSMUSG00000023913	27226	Q60963	Pla2g7	Platelet-activating factor acetylhydrolase [Source:UniProtKB/Swiss-Prot;Acc:Q60963]	18.1629	21.4727	14.0769	12.3604	14.269	12.5819	3.54191	5.27466	2.21281	4.44713
ENSMUSG00000032523	-1.00825998811251	5.9099e-07	6.70767e-05	down	9:-:121784016-121792507	9:-:121784016-121792507	ENSMUSG00000032523	74770	Q9D1G3	Hhatl	Protein-cysteine N-palmitoyltransferase HHAT-like protein [Source:UniProtKB/Swiss-Prot;Acc:Q9D1G3]	47.5713	42.0485	65.5476	49.381	53.1484	47.1459	109.118	88.8324	91.9516	83.9042
ENSMUSG00000070803	-1.58495409205952	7.14527e-07	7.41928e-05	down	4:+:120666572-120667820	4:+:120666572-120667820	ENSMUSG00000070803	56222	Q9WUL8	Cited4	Cbp/p300-interacting transactivator 4 [Source:UniProtKB/Swiss-Prot;Acc:Q9WUL8]	10.8965	8.87779	8.4546	12.3429	17.1477	13.3933	22.5088	30.0392	29.3664	25.2058
ENSMUSG00000026786	2.04885	7.78469e-07	7.73524e-05	up	2:+:22774094-22875653	2:+:22774094-22875653	ENSMUSG00000026786	54519	Q8R5A3	Apbb1ip	amyloid beta (A4) precursor protein-binding, family B, member 1 interacting protein [Source:MGI Symbol;Acc:MGI:1861354]	4.04809	4.02923	3.86796	2.74647	3.82197	2.45436	0.4556	1.09716	0.32301	0.7782
ENSMUSG00000101389	2.46824	8.06118e-07	7.8815e-05	up	19:+:11375523-11392790	19:+:11375523-11392790	ENSMUSG00000101389	666907	A0A087WRT7	Ms4a4a	membrane-spanning 4-domains, subfamily A, member 4A	46.5305	49.0571	28.1109	22.9738	29.1453	30.9872	2.42425	6.48673	3.4677	6.6764
ENSMUSG00000036469	2.41487	7.74577e-07	7.73524e-05	up	8:+:65617900-66471637	8:+:65617900-66471637	ENSMUSG00000036469	72925	Q6NZQ8	March1	E3 ubiquitin-protein ligase MARCH1 [Source:UniProtKB/Swiss-Prot;Acc:Q6NZQ8]	2.28117	3.01126	1.91234	1.618	2.97188	1.86394	0.21816	0.61769	0.20284	0.28083
ENSMUSG00000004707	3.87332	4.53743e-07	5.79712e-05	up	1:-:171588624-171607410	1:-:171588624-171607410	ENSMUSG00000004707	17085	Q01965	Ly9	T-lymphocyte surface antigen Ly-9 [Source:UniProtKB/Swiss-Prot;Acc:Q01965]	4.22293	4.6697	3.4123	2.48625	4.58443	2.53715	0.09428	0.51483	0.09529	0.17067
ENSMUSG00000002699	1.72062	8.19192e-07	7.944e-05	up	11:+:34046920-34092295	11:+:34046920-34092295	ENSMUSG00000002699	16822	Q60787	Lcp2	Lymphocyte cytosolic protein 2 [Source:UniProtKB/Swiss-Prot;Acc:Q60787]	4.00886	4.88263	3.34334	2.69384	4.29051	3.1518	0.57105	1.18789	0.65014	0.87199
ENSMUSG00000063193	3.49899	6.42177e-07	6.99137e-05	up	11:-:114922781-114934386	11:-:114922781-114934386	ENSMUSG00000063193	217304	Q3TEQ8	Cd300lb	Mus musculus CD300 molecule like family member B (Cd300lb), transcript variant 2, mRNA. [Source:RefSeq mRNA;Acc:NM_001347651]	6.68514	7.82822	5.83828	3.23705	4.16614	4.76399	0.14252	0.54043	0.34568	0.45148
ENSMUSG00000027947	1.26667	7.93525e-07	7.79838e-05	up	3:-:89864059-89913196	3:-:89864059-89913196	ENSMUSG00000027947	16194	P22272	Il6ra	Interleukin-6 receptor subunit alpha [Source:UniProtKB/Swiss-Prot;Acc:P22272]	4.3073	4.43511	3.19255	3.38194	4.35792	3.51338	0.98616	1.69281	0.8751	1.42959
ENSMUSG00000042349	1.37992	8.27796e-07	8.00094e-05	up	1:-:131254343-131279606	1:-:131254343-131279606	ENSMUSG00000042349	56489	Q9R0T8	Ikbke	Inhibitor of nuclear factor kappa-B kinase subunit epsilon [Source:UniProtKB/Swiss-Prot;Acc:Q9R0T8]	2.05541	2.14475	2.04919	1.78785	2.49506	1.87244	0.44947	0.61533	0.43328	0.85537
ENSMUSG00000024411	-2.6076914939043	6.86275e-07	7.25569e-05	down	18:-:15389394-15403684	18:-:15389394-15403684	ENSMUSG00000024411	11829	Q8BR89	Aqp4	aquaporin 4	4.92638	2.98889	12.6303	9.82098	10.5715	7.4914	39.8589	39.3952	34.2514	38.2054
ENSMUSG00000038582	-1.23556555045543	7.00921e-07	7.35461e-05	down	5:+:122284365-122324281	5:+:122284365-122324281	ENSMUSG00000038582	320717	Q6NVE9	Pptc7	Protein phosphatase PTC7 homolog [Source:UniProtKB/Swiss-Prot;Acc:Q6NVE9]	10.1694	6.19083	10.0697	9.69167	10.5178	9.37894	18.2249	18.2397	17.0008	18.8977
ENSMUSG00000027165	-1.05723315681804	7.65352e-07	7.70244e-05	down	2:-:101560781-101649532	2:-:101560781-101649532	ENSMUSG00000027165	68170	Q9CQI4	B230118H07Rik	Uncharacterized [Source:UniProtKB/Swiss-Prot;Acc:Q9CQI4]	5.48202	5.70183	5.22585	6.46988	6.08769	7.44599	10.6258	9.58574	10.0065	9.88437
ENSMUSG00000049422	-1.04441582799528	7.03165e-07	7.35461e-05	down	10:+:75933130-75937747	10:+:75933130-75937747	ENSMUSG00000049422	103172	Q7TNL9	Chchd10	coiled-coil-helix-coiled-coil-helix domain containing 10	46.7523	44.6845	63.5625	45.6779	43.8129	40.7532	93.8355	89.481	85.1092	72.0703
ENSMUSG00000017830	2.17326	7.59837e-07	7.67331e-05	up	11:-:100694884-100704271	11:-:100694884-100704271	ENSMUSG00000017830	80861	Q99J87	Dhx58	Probable ATP-dependent RNA helicase DHX58 [Source:UniProtKB/Swiss-Prot;Acc:Q99J87]	3.05751	2.44493	2.94256	2.70916	3.34639	2.48416	0.38117	0.84796	0.36596	0.2875
ENSMUSG00000020826	-1.72982070351407	8.78676e-07	8.38731e-05	down	11:+:78920787-78960254	11:+:78920787-78960254	ENSMUSG00000020826	18126	P29477	Nos2	Nitric oxide synthase, inducible [Source:UniProtKB/Swiss-Prot;Acc:P29477]	0.7942	1.21645	0.89167	1.96547	1.48631	1.40252	2.79146	2.9156	2.82826	3.2977
ENSMUSG00000027010	-1.22896756246593	6.59134e-07	7.09684e-05	down	2:-:71271063-71367749	2:-:71271063-71367749	ENSMUSG00000027010	78830	Q8BH59	Slc25a12	solute carrier family 25 (mitochondrial carrier, Aralar), member 12 [Source:MGI Symbol;Acc:MGI:1926080]	24.1394	18.6886	31.0709	28.9939	29.6301	28.7769	56.8213	56.839	67.4766	50.9171
ENSMUSG00000043230	-1.68012820018865	7.22016e-07	7.41928e-05	down	1:-:80198706-80218473	1:-:80198706-80218473	ENSMUSG00000043230	241128	Q8BLQ0	Fam124b	Protein FAM124B [Source:UniProtKB/Swiss-Prot;Acc:Q8BLQ0]	0.48408	0.45247	0.35465	0.36356	0.50179	0.3749	0.91331	1.12703	0.78847	0.93407
ENSMUSG00000043162	-1.1903990505798	8.10057e-07	7.8815e-05	down	6:-:57686576-57692078	6:-:57686576-57692078	ENSMUSG00000043162	66459	Q9D1C3	Pyurf	Protein preY, mitochondrial [Source:UniProtKB/Swiss-Prot;Acc:Q9D1C3]	5.17349	4.87471	5.75152	5.91468	5.35443	7.58785	10.908	9.9536	10.4242	9.77644
ENSMUSG00000112023	3.24013	9.02592e-07	8.41892e-05	up	10:+:51480632-51486703	10:+:51480632-51486703	ENSMUSG00000112023	14727	Q549E3	Lilr4b	leukocyte immunoglobulin-like receptor, subfamily B, member 4B	8.2537	15.2109	13.5905	6.64902	6.28273	5.94877	0.44905	0.96226	0.57935	0.84171
ENSMUSG00000037989	-2.02892477032672	7.79176e-07	7.73524e-05	down	13:-:49036303-49148014	13:-:49036303-49148014	ENSMUSG00000037989	75607	E9QMI8	Wnk2	WNK lysine deficient protein kinase 2 [Source:MGI Symbol;Acc:MGI:1922857]	2.86816	1.91041	5.45042	4.74128	4.68893	4.00672	12.4078	12.0672	14.2674	12.0901
ENSMUSG00000116056	-1.71025125430676	8.98683e-07	8.41892e-05	down	15:+:102657111-102660468	15:+:102657111-102660468	ENSMUSG00000116056	-	-	AC123870.1	-	4.96624	5.50993	10.3527	5.14821	6.01616	6.36218	19.0669	16.9234	13.2531	12.0815
ENSMUSG00000024210	-1.01581630693503	7.5361e-07	7.63676e-05	down	17:-:27143969-27167764	17:-:27143969-27167764	ENSMUSG00000024210	271424	Q8BWD2	Ip6k3	Inositol hexakisphosphate kinase 3 [Source:UniProtKB/Swiss-Prot;Acc:Q8BWD2]	27.2514	22.5396	32.4673	31.2959	30.6936	26.1404	51.2	53.7912	48.9804	42.8961
ENSMUSG00000097415	1.1308	9.06613e-07	8.42891e-05	up	7:-:75769038-75782099	7:-:75769038-75782099	ENSMUSG00000097415	100504230	-	AU020206	expressed sequence AU020206 [Source:MGI Symbol;Acc:MGI:2142134]	8.20102	8.93875	6.62264	6.70746	8.99877	6.87358	2.42801	3.40101	2.1936	2.47785
ENSMUSG00000068079	-1.50611818878252	9.01558e-07	8.41892e-05	down	2:+:152143561-152149097	2:+:152143561-152149097	ENSMUSG00000068079	21407	Q60756	Tcf15	Transcription factor 15 [Source:UniProtKB/Swiss-Prot;Acc:Q60756]	9.58652	11.5213	14.9481	11.6015	7.24394	9.31074	25.1345	27.2818	16.8486	21.2457
ENSMUSG00000045534	-1.42817225820267	8.95174e-07	8.41892e-05	down	6:-:126532551-126535412	6:-:126532551-126535412	ENSMUSG00000045534	16493	Q61762	Kcna5	Potassium voltage-gated channel subfamily A member 5 [Source:UniProtKB/Swiss-Prot;Acc:Q61762]	5.00374	5.16578	3.2194	4.89278	3.61558	4.80057	9.69594	12.3823	6.80422	7.82271
ENSMUSG00000066632	-1.52681478675222	9.34237e-07	8.50011e-05	down	12:-:10898986-10900240	12:-:10898986-10900240	ENSMUSG00000066632	668435	-	Pgk1-rs7	phosphoglycerate kinase-1, related sequence-7 [Source:MGI Symbol;Acc:MGI:97562]	2.266	1.97686	2.5985	2.25205	3.54737	2.50708	4.679	5.82838	5.52381	4.29747
ENSMUSG00000055865	-1.70932970237156	9.57679e-07	8.60324e-05	down	3:-:104767406-104781840	3:-:104767406-104781840	ENSMUSG00000055865	329731	Q7TPG6	Fam19a3	Protein FAM19A3 [Source:UniProtKB/Swiss-Prot;Acc:Q7TPG6]	0.62289	0.62104	1.13132	1.14602	1.11361	0.79525	2.19035	1.96878	2.17849	1.84615
ENSMUSG00000024066	1.66413	8.79228e-07	8.38731e-05	up	17:-:73883908-73950182	17:-:73883908-73950182	ENSMUSG00000024066	22436	Q00519	Xdh	xanthine dehydrogenase	11.9678	13.9522	11.3864	16.7063	15.6601	13.3072	2.0732	5.27881	2.62418	4.62111
ENSMUSG00000016918	1.01909	7.84777e-07	7.76452e-05	up	1:+:12692277-12861192	1:+:12692277-12861192	ENSMUSG00000016918	240725	Q8K007	Sulf1	Extracellular sulfatase Sulf-1 [Source:UniProtKB/Swiss-Prot;Acc:Q8K007]	13.9929	18.3447	15.9315	12.4101	12.0281	13.8413	5.25456	7.20238	5.35131	6.79661
ENSMUSG00000112148	2.76765	9.56082e-07	8.60324e-05	up	10:+:51490956-51496611	10:+:51490956-51496611	ENSMUSG00000112148	14728	Q64281	Lilrb4	Leukocyte immunoglobulin-like receptor subfamily B member 4 [Source:UniProtKB/Swiss-Prot;Acc:Q64281]	3.62386	6.29628	5.42692	3.42863	3.74067	3.30069	0.18889	0.51874	0.50639	0.77986
ENSMUSG00000109473	-3.86093270738774	2.37621e-07	4.39968e-05	down	8:-:10870422-10882454	8:-:10870422-10882454	ENSMUSG00000109473	320014	-	B930025P03Rik	RIKEN cDNA B930025P03 gene	0.06578	0.06559	0.10058	0.10401	0.03896	0.03396	0.62265	0.55134	0.67348	1.15759
ENSMUSG00000024442	-1.07072301558696	8.09922e-07	7.8815e-05	down	18:+:38250249-38262629	18:+:38250249-38262629	ENSMUSG00000024442	66839	Q9DCV6	0610009O20Rik	RIKEN cDNA 0610009O20 gene	22.2227	20.1348	28.8964	26.132	28.2039	22.8824	43.7516	40.4205	50.2548	42.6783
ENSMUSG00000073902	2.7914	8.99374e-07	8.41892e-05	up	7:-:106596743-106604035	7:-:106596743-106604035	ENSMUSG00000073902	434223	Q3TBC0	Gm1966	predicted gene 1966	1.79651	1.79811	1.76023	1.76154	3.30794	1.76885	0.11401	0.40637	0.1469	0.24077
ENSMUSG00000031840	-1.29867394606804	9.02663e-07	8.41892e-05	down	8:+:70754679-70758677	8:+:70754679-70758677	ENSMUSG00000031840	19339	Q0PD63	Rab3a	RAB3A, member RAS oncogene family [Source:MGI Symbol;Acc:MGI:97843]	9.1938	7.39233	8.99935	9.95548	9.89179	11.3549	19.3997	19.6593	20.5825	14.2555
ENSMUSG00000021423	2.90681	1.01001e-06	8.90937e-05	up	13:+:37345208-37419036	13:+:37345208-37419036	ENSMUSG00000021423	17084	O88188	Ly86	lymphocyte antigen 86	12.7376	15.0557	6.81251	5.85397	9.35883	8.1865	1.00154	1.54518	0.5379	0.74247
ENSMUSG00000021868	-1.00008757117373	9.21041e-07	8.48227e-05	down	14:+:25694154-25700468	14:+:25694154-25700468	ENSMUSG00000021868	105675	Q99KR7	Ppif	Peptidyl-prolyl cis-trans isomerase F, mitochondrial [Source:UniProtKB/Swiss-Prot;Acc:Q99KR7]	4.51043	4.04532	5.37751	4.75009	5.51044	4.92793	7.14994	8.70098	7.57159	7.261
ENSMUSG00000059363	-1.14480439954	9.98788e-07	8.86379e-05	down	19:-:24261453-24280605	19:-:24261453-24280605	ENSMUSG00000059363	14297	O35943	Fxn	Frataxin, mitochondrial Frataxin intermediate form Frataxin mature form [Source:UniProtKB/Swiss-Prot;Acc:O35943]	4.9719	4.88314	6.47992	5.31898	5.36267	4.2146	9.163	7.80151	7.73573	9.59178
ENSMUSG00000026251	1.54243	9.86477e-07	8.83483e-05	up	1:+:87190607-87200070	1:+:87190607-87200070	ENSMUSG00000026251	11447	Q80VZ5	Chrnd	cholinergic receptor, nicotinic, delta polypeptide [Source:MGI Symbol;Acc:MGI:87893]	17.6071	12.9197	12.9567	9.39684	9.91714	10.7017	3.22416	2.7808	3.43092	3.26154
ENSMUSG00000028864	2.66658	9.20419e-07	8.48227e-05	up	5:+:16553495-16620152	5:+:16553495-16620152	ENSMUSG00000028864	15234	Q08048	Hgf	Hepatocyte growth factor Hepatocyte growth factor alpha chain Hepatocyte growth factor beta chain [Source:UniProtKB/Swiss-Prot;Acc:Q08048]	1.81619	2.46606	1.77204	1.46597	1.38139	1.33544	0.15909	0.41242	0.16663	0.10473
ENSMUSG00000020623	-1.63963836394596	1.02094e-06	8.94348e-05	down	11:+:110399122-110525522	11:+:110399122-110525522	ENSMUSG00000020623	26399	P70236	Map2k6	mitogen-activated protein kinase kinase 6 [Source:MGI Symbol;Acc:MGI:1346870]	3.08176	2.16111	2.26955	2.55521	3.05699	2.20783	7.09174	7.47018	5.76417	3.78755
ENSMUSG00000056069	2.43365	1.05471e-06	9.13852e-05	up	15:-:27655069-27681579	15:-:27655069-27681579	ENSMUSG00000056069	223433	Q3TVP5	Fam105a	family with sequence similarity 105, member A	11.7681	11.1465	7.93032	5.23055	7.49357	6.2786	0.81955	1.40037	0.6288	1.75605
ENSMUSG00000002289	1.29235	8.8821e-07	8.41892e-05	up	17:-:33773750-33781575	17:-:33773750-33781575	ENSMUSG00000002289	57875	Q9Z1P8	Angptl4	Angiopoietin-related protein 4 [Source:UniProtKB/Swiss-Prot;Acc:Q9Z1P8]	29.3012	44.9461	29.8831	40.3274	33.4312	28.6935	13.6319	13.2792	8.20854	11.5273
ENSMUSG00000037818	-1.09373469219349	1.02609e-06	8.94348e-05	down	3:+:40846970-40938138	3:+:40846970-40938138	ENSMUSG00000037818	269423	Q8C1A9	Abhd18	abhydrolase domain containing 18 [Source:MGI Symbol;Acc:MGI:1915468]	1.39852	1.25402	1.46719	1.42437	1.63529	1.2988	2.53696	2.62738	2.23709	1.88409
ENSMUSG00000107689	-1.54957108682464	1.08448e-06	9.3138e-05	down	6:-:86513891-86516273	6:-:86513891-86516273	ENSMUSG00000107689	-	-	Gm44386	predicted gene, 44386 [Source:MGI Symbol;Acc:MGI:5690778]	18.1113	16.8773	26.3042	16.7699	16.6882	22.125	53.2983	33.8068	36.579	45.3172
ENSMUSG00000020919	-1.01544055391904	8.59632e-07	8.25416e-05	down	11:-:100780731-100850724	11:-:100780731-100850724	ENSMUSG00000020919	20851	P42232	Stat5b	Signal transducer and activator of transcription 5B [Source:UniProtKB/Swiss-Prot;Acc:P42232]	21.7653	17.6695	23.1203	25.2578	25.6873	23.9903	43.3065	37.5451	49.3	39.6613
ENSMUSG00000020744	-1.17915218728353	1.00246e-06	8.86947e-05	down	11:-:115614178-115628295	11:-:115614178-115628295	ENSMUSG00000020744	67283	Q9DAM5	Slc25a19	Mitochondrial thiamine pyrophosphate carrier [Source:UniProtKB/Swiss-Prot;Acc:Q9DAM5]	4.60399	5.30715	5.50295	6.70107	7.69578	5.43155	9.8872	12.577	9.37654	9.90699
ENSMUSG00000096146	-1.2629057680045	9.41991e-07	8.51455e-05	down	7:-:46093953-46100764	7:-:46093953-46100764	ENSMUSG00000096146	16514	Q61743	Kcnj11	ATP-sensitive inward rectifier potassium channel 11 [Source:UniProtKB/Swiss-Prot;Acc:Q61743]	12.2917	8.68878	14.5141	13.3291	13.9073	11.2524	28.6752	22.088	23.978	23.4855
ENSMUSG00000025314	1.27541	1.04571e-06	9.0874e-05	up	2:-:90429754-90580647	2:-:90429754-90580647	ENSMUSG00000025314	19271	E9Q4S7	Ptprj	protein tyrosine phosphatase, receptor type J [Source:HGNC Symbol;Acc:HGNC:9673]	6.65185	6.57146	5.75152	4.28384	5.61854	4.55835	1.45594	2.42353	1.4035	2.04238
ENSMUSG00000068196	2.67063	9.95322e-07	8.85988e-05	up	16:-:57624258-57754737	16:-:57624258-57754737	ENSMUSG00000068196	12837	Q00780	Col8a1	Collagen alpha-1(VIII) chain Vastatin [Source:UniProtKB/Swiss-Prot;Acc:Q00780]	49.7885	53.2189	36.0968	18.0204	21.3533	25.7579	3.0622	5.06136	3.45459	5.11969
ENSMUSG00000002409	-1.09516424735459	9.17442e-07	8.48227e-05	down	7:+:28179469-28187294	7:+:28179469-28187294	ENSMUSG00000002409	13549	Q9Z188	Dyrk1b	Dual specificity tyrosine-phosphorylation-regulated kinase 1B [Source:UniProtKB/Swiss-Prot;Acc:Q9Z188]	25.9095	20.1776	28.9454	32.5582	30.0473	27.5528	46.5283	52.5749	56.2167	46.9592
ENSMUSG00000025283	1.27139	9.89491e-07	8.83483e-05	up	X:-:155213132-155216449	X:-:155213132-155216449	ENSMUSG00000025283	20229	P48026	Sat1	spermidine/spermine N1-acetyl transferase 1 [Source:MGI Symbol;Acc:MGI:98233]	39.8536	40.4835	26.9455	27.023	27.6301	30.3221	10.2283	12.0022	7.76979	13.3836
ENSMUSG00000043795	-1.23343560155111	9.34588e-07	8.50011e-05	down	7:-:142491074-142506771	7:-:142491074-142506771	ENSMUSG00000043795	677289	Q8C494	Prr33	proline rich 33	24.829	18.4802	27.2487	31.2418	33.0017	26.4656	53.9799	48.9847	57.2509	54.7004
ENSMUSG00000079017	2.72927	1.19076e-06	9.85099e-05	up	12:-:103442167-103443680	12:-:103442167-103443680	ENSMUSG00000079017	76933	Q8R412	Ifi27l2a	Interferon alpha-inducible protein 27-like protein 2A [Source:UniProtKB/Swiss-Prot;Acc:Q8R412]	50.3439	93.4993	54.8941	74.6397	80.9517	52.3265	5.49963	20.1565	4.21959	5.55343
ENSMUSG00000024300	2.85657	1.19909e-06	9.86423e-05	up	17:+:33555719-33607764	17:+:33555719-33607764	ENSMUSG00000024300	17916	Q8CG29	Myo1f	myosin IF [Source:MGI Symbol;Acc:MGI:107711]	12.5768	15.239	11.5978	6.06529	8.41087	7.30999	0.5076	2.10447	0.80797	1.19964
ENSMUSG00000037405	1.01109	1.16844e-06	9.72129e-05	up	9:+:21015985-21028817	9:+:21015985-21028817	ENSMUSG00000037405	15894	P13597	Icam1	intercellular adhesion molecule 1 [Source:MGI Symbol;Acc:MGI:96392]	6.12653	6.36381	5.7225	6.24666	6.08515	4.87113	2.08579	2.06816	1.89354	2.70414
ENSMUSG00000037946	2.38775	1.18756e-06	9.85099e-05	up	13:-:49261554-49320311	13:-:49261554-49320311	ENSMUSG00000037946	30938	Q3TNB8	Fgd3	FYVE, RhoGEF and PH domain containing 3 [Source:HGNC Symbol;Acc:HGNC:16027]	3.72507	2.61075	2.18696	1.79498	2.54176	1.80556	0.28524	0.48247	0.16772	0.44855
ENSMUSG00000033777	3.4021	1.23658e-06	0.000100206	up	X:+:106143204-106160493	X:+:106143204-106160493	ENSMUSG00000033777	279572	Q6R5N8	Tlr13	Toll-like receptor 13 [Source:UniProtKB/Swiss-Prot;Acc:Q6R5N8]	9.28405	12.5402	8.80464	4.4961	5.03555	5.08227	0.45785	0.60187	0.33932	0.56789
ENSMUSG00000037490	-1.54039135613751	1.26701e-06	0.000101343	down	10:+:22645011-22704285	10:+:22645011-22704285	ENSMUSG00000037490	353169	B2RRB2	Slc2a12	solute carrier family 2 (facilitated glucose transporter), member 12 [Source:MGI Symbol;Acc:MGI:3052471]	1.76187	0.94404	1.73482	1.86473	1.6187	1.47282	3.36055	3.27415	3.61441	2.78265
ENSMUSG00000046916	-1.08381499903392	1.19508e-06	9.8589e-05	down	10:+:5593775-5606904	10:+:5593775-5606904	ENSMUSG00000046916	68632	Q8R411	Myct1	Myc target protein 1 [Source:UniProtKB/Swiss-Prot;Acc:Q8R411]	4.35535	5.83733	5.18547	6.09607	5.15973	4.1104	9.09631	9.26463	7.04425	7.58289
ENSMUSG00000089838	-1.27205082908403	1.2738e-06	0.000101343	down	1:-:170925309-170925644	1:-:170925309-170925644	ENSMUSG00000089838	100504052	-	Gm2962	predicted pseudogene 2962 [Source:MGI Symbol;Acc:MGI:3781140]	23.4265	25.0145	24.9575	20.4556	18.8005	29.3413	48.254	46.5421	34.5119	38.2625
ENSMUSG00000040856	1.10739	9.39636e-07	8.51455e-05	up	12:+:109452823-109463336	12:+:109452823-109463336	ENSMUSG00000040856	13386	Q925U3	Dlk1	delta like non-canonical Notch ligand 1 [Source:HGNC Symbol;Acc:HGNC:2907]	85.5684	95.4906	125.378	131.376	121.153	121.862	49.1825	46.3147	47.7369	50.8068
ENSMUSG00000032177	-1.3425901421484	1.1544e-06	9.65939e-05	down	9:+:21165714-21213248	9:+:21165714-21213248	ENSMUSG00000032177	18577	Q3TUD0	Pde4a	phosphodiesterase 4A, cAMP specific [Source:MGI Symbol;Acc:MGI:99558]	2.47445	2.18269	2.95503	3.63338	3.67021	2.5004	5.11173	6.63109	6.26512	5.01377
ENSMUSG00000021457	1.61557	1.21962e-06	0.00010005	up	13:+:52583173-52648792	13:+:52583173-52648792	ENSMUSG00000021457	20963	Q3UPF7	Syk	spleen tyrosine kinase [Source:MGI Symbol;Acc:MGI:99515]	6.88349	6.91171	5.93275	4.43919	6.38116	4.74434	1.07684	2.55273	1.01648	1.74166
ENSMUSG00000037106	-2.37511156788718	1.36097e-06	0.000104749	down	15:+:58510048-58665092	15:+:58510048-58665092	ENSMUSG00000037106	631797	E0CZ42	Fer1l6	fer-1 like family member 6 [Source:HGNC Symbol;Acc:HGNC:28065]	0.52971	0.15718	0.3921	0.50252	0.52295	0.61862	1.66487	1.68351	1.94081	1.16813
ENSMUSG00000020546	-1.46683045491532	1.24827e-06	0.000100431	down	11:-:90476492-90638084	11:-:90476492-90638084	ENSMUSG00000020546	20913	Q9WV89	Stxbp4	Syntaxin-binding protein 4 [Source:UniProtKB/Swiss-Prot;Acc:Q9WV89]	1.12002	0.82147	1.11978	1.41127	1.36246	1.51107	2.29662	2.38183	2.99824	2.6285
ENSMUSG00000000253	-1.20033393113361	1.08332e-06	9.3138e-05	down	13:+:45507444-45553800	13:+:45507444-45553800	ENSMUSG00000000253	66355	Q9DCZ1	Gmpr	guanosine monophosphate reductase [Source:MGI Symbol;Acc:MGI:1913605]	27.9818	20.9022	37.4356	29.8913	29.3945	29.8205	68.229	54.8323	56.9718	51.0506
ENSMUSG00000021221	-1.5349328376011	1.35057e-06	0.000104361	down	12:-:83213745-83487716	12:-:83213745-83487716	ENSMUSG00000021221	70127	P58269	Dpf3	Zinc finger protein DPF3 [Source:UniProtKB/Swiss-Prot;Acc:P58269]	1.44235	1.06656	2.34009	1.99165	1.65177	1.81212	3.78828	3.47747	3.40093	3.44366
ENSMUSG00000023349	2.17897	1.34342e-06	0.000104359	up	6:+:123229843-123247021	6:+:123229843-123247021	ENSMUSG00000023349	56620	Q3V2N1	Clec4n	C-type lectin domain family 6 member A [Source:UniProtKB/Swiss-Prot;Acc:Q9JKF4]	11.9089	13.7633	6.59805	8.68523	11.2273	8.34605	1.42723	2.44235	1.02077	1.50158
ENSMUSG00000026430	1.43615	1.39776e-06	0.000105787	up	1:-:131176410-131245258	1:-:131176410-131245258	ENSMUSG00000026430	54354	Q5EBH1	Rassf5	Ras association domain-containing protein 5 [Source:UniProtKB/Swiss-Prot;Acc:Q5EBH1]	4.94232	5.42166	4.62338	3.90518	5.46376	3.22747	1.1181	1.53028	0.85143	1.36503
ENSMUSG00000025813	-1.01518375933487	1.29371e-06	0.000102123	down	7:-:81600481-81707527	7:-:81600481-81707527	ENSMUSG00000025813	26557	Q9QWW1	Homer2	Homer protein homolog 2 [Source:UniProtKB/Swiss-Prot;Acc:Q9QWW1]	1.77041	1.23561	1.43139	1.26728	1.16309	1.13431	1.8199	2.28327	2.01733	2.19628
ENSMUSG00000040543	-2.08044944114947	1.42386e-06	0.000106376	down	11:-:72047528-72135778	11:-:72047528-72135778	ENSMUSG00000040543	327958	Q3UHE1	Pitpnm3	Membrane-associated phosphatidylinositol transfer protein 3 [Source:UniProtKB/Swiss-Prot;Acc:Q3UHE1]	0.20179	0.17023	0.45356	0.37304	0.45972	0.33126	0.98478	0.86732	0.68062	1.28429
ENSMUSG00000040631	-1.10292714340852	1.36274e-06	0.000104749	down	8:-:94863828-94876330	8:-:94863828-94876330	ENSMUSG00000040631	114255	Q99KE3	Dok4	Docking protein 4 [Source:UniProtKB/Swiss-Prot;Acc:Q99KE3]	3.84112	3.79655	3.44074	3.89109	3.48677	3.417	7.14658	6.89622	4.60178	5.09262
ENSMUSG00000030137	-1.6514270590547	1.13764e-06	9.62917e-05	down	6:+:121210696-121226854	6:+:121210696-121226854	ENSMUSG00000030137	53857	Q9JJZ2	Tuba8	tubulin, alpha 8 [Source:MGI Symbol;Acc:MGI:1858225]	23.7195	18.4136	31.3602	19.5003	30.3599	23.1263	76.0084	60.3264	87.2222	44.5338
ENSMUSG00000024013	1.94869	1.42777e-06	0.000106396	up	17:+:29360914-29379660	17:+:29360914-29379660	ENSMUSG00000024013	26382	Q8BY35	Fgd2	FYVE, RhoGEF and PH domain-containing protein 2 [Source:UniProtKB/Swiss-Prot;Acc:Q8BY35]	7.84957	7.58129	4.8458	4.00883	6.8253	4.60466	0.70394	1.26602	1.09762	1.42599
ENSMUSG00000050071	1.96135	1.40697e-06	0.000105787	up	X:-:136213972-136215513	X:-:136213972-136215513	ENSMUSG00000050071	19716	Q9R224	Bex1	Protein BEX1 [Source:UniProtKB/Swiss-Prot;Acc:Q9R224]	38.194	36.1594	22.6957	19.1729	20.4935	29.6245	6.17807	4.6256	3.93221	5.71081
ENSMUSG00000024677	2.12452	1.40831e-06	0.000105787	up	19:+:11516512-11531256	19:+:11516512-11531256	ENSMUSG00000024677	69774	Q99N09	Ms4a6b	Membrane-spanning 4-domains subfamily A member 6B [Source:UniProtKB/Swiss-Prot;Acc:Q99N09]	9.46584	11.4246	5.85155	5.65722	10.8251	6.87505	1.15866	2.12299	0.85715	1.59405
ENSMUSG00000002908	-1.37197350117661	1.44488e-06	0.000107255	down	8:-:70842049-70863258	8:-:70842049-70863258	ENSMUSG00000002908	84036	A0A140T8Q8	Kcnn1	potassium calcium-activated channel subfamily N member 1 [Source:HGNC Symbol;Acc:HGNC:6290]	1.12924	0.8389	0.98178	1.07828	1.04925	1.47476	1.98257	1.97956	2.01966	1.96876
ENSMUSG00000026458	1.34266	1.30806e-06	0.000102978	up	1:-:134296783-134332928	1:-:134296783-134332928	ENSMUSG00000026458	68507	B8QI36	Ppfia4	protein tyrosine phosphatase, receptor type, f polypeptide (PTPRF), interacting protein (liprin), alpha 4 [Source:MGI Symbol;Acc:MGI:1915757]	12.1316	8.35131	7.25416	6.69517	7.94587	8.45005	2.41959	2.41789	2.88641	2.72915
ENSMUSG00000028838	-1.0549042885555	1.24201e-06	0.000100206	down	4:-:134356372-134383850	4:-:134356372-134383850	ENSMUSG00000028838	56219	Q3TSP4	Extl1	Exostosin-like 1 [Source:UniProtKB/Swiss-Prot;Acc:Q9JKV7]	7.96958	5.93606	7.72931	8.109	8.92774	8.25385	12.3169	12.3844	14.0792	13.6195
ENSMUSG00000099906	1.70017	1.31514e-06	0.000103053	up	1:+:20669882-20684298	1:+:20669882-20684298	ENSMUSG00000099906	105661730	-	Gm28653	long intergenic non-protein coding RNA of muscle differentiation 1	15.5431	13.8733	12.3278	16.8021	13.6125	16.5415	2.90208	2.36279	4.2688	6.02164
ENSMUSG00000022594	-1.12110472358259	1.1428e-06	9.64498e-05	down	15:-:74747852-74753046	15:-:74747852-74753046	ENSMUSG00000022594	23936	Q9WVC2	Lynx1	Ly-6/neurotoxin-like protein 1 [Source:UniProtKB/Swiss-Prot;Acc:P0DP60]	28.4413	19.4946	34.7756	25.1868	28.5193	26.6136	57.3386	46.6368	60.4126	52.261
ENSMUSG00000083563	-1.17663041916669	1.47059e-06	0.000107669	down	2:-:22588103-22589647	2:-:22588103-22589647	ENSMUSG00000083563	-	-	Gm13340	predicted gene 13340 [Source:MGI Symbol;Acc:MGI:3650227]	6.21225	5.30896	7.80643	7.27575	7.08699	8.07811	10.3595	12.8971	11.2174	12.502
ENSMUSG00000026072	1.31462	1.38108e-06	0.000105329	up	1:+:40225080-40317257	1:+:40225080-40317257	ENSMUSG00000026072	16177	Q32MH0	Il1r1	Interleukin-1 receptor type 1 Interleukin-1 receptor type 1, membrane form Interleukin-1 receptor type 1, soluble form [Source:UniProtKB/Swiss-Prot;Acc:P13504]	6.95139	12.095	8.11884	7.42992	8.27304	8.1095	2.10706	3.22074	2.32753	3.1736
ENSMUSG00000059089	5.13113	4.50795e-07	5.79712e-05	up	1:+:171018920-171029761	1:+:171018920-171029761	ENSMUSG00000059089	246256	A0A0B4J1G0	Fcgr4	Low affinity immunoglobulin gamma Fc region receptor IV [Source:UniProtKB/Swiss-Prot;Acc:A0A0B4J1G0]	12.2913	17.1729	7.95413	7.62018	7.71179	7.51526	0.08275	0.20082	0.20071	0.29959
ENSMUSG00000039747	1.09336	1.52173e-06	0.0001093	up	5:-:136147459-136170713	5:-:136147459-136170713	ENSMUSG00000039747	269717	Q14BR6	Orai2	Protein orai-2 [Source:UniProtKB/Swiss-Prot;Acc:Q8BH10]	3.77715	4.52411	4.22491	3.04419	3.57386	3.14967	1.26558	1.51495	1.02668	1.32093
ENSMUSG00000033502	-1.02545116889637	1.42183e-06	0.000106376	down	3:-:116272553-116424032	3:-:116272553-116424032	ENSMUSG00000033502	229776	Q6GQT0	Cdc14a	Dual specificity protein phosphatase CDC14A [Source:UniProtKB/Swiss-Prot;Acc:Q6GQT0]	1.46044	1.20305	1.34022	1.55784	1.44427	1.65848	2.2779	2.20093	2.25649	2.27114
ENSMUSG00000017493	1.32057	1.14615e-06	9.64545e-05	up	11:+:99041244-99054392	11:+:99041244-99054392	ENSMUSG00000017493	16010	P47879	Igfbp4	Insulin-like growth factor-binding protein 4 [Source:UniProtKB/Swiss-Prot;Acc:P47879]	151.428	172.258	114.124	95.479	101.945	103.015	45.7643	60.2584	37.5333	42.0786
ENSMUSG00000086584	-1.50076707641879	1.60278e-06	0.000111494	down	11:+:12314514-12351028	11:+:12314514-12351028	ENSMUSG00000086584	100503630	-	Gm12002	predicted gene 12002 [Source:MGI Symbol;Acc:MGI:3651521]	1.14201	1.359	1.18285	1.67751	1.28746	1.3885	2.73306	3.93392	1.92014	2.32018
ENSMUSG00000054555	1.54793	1.37334e-06	0.000105012	up	7:-:133883199-134232146	7:-:133883199-134232146	ENSMUSG00000054555	11489	Q61824	Adam12	Disintegrin and metalloproteinase domain-containing protein 12 [Source:UniProtKB/Swiss-Prot;Acc:Q61824]	11.1287	12.0151	7.42698	7.55164	9.46835	8.29772	2.17733	4.46105	2.01469	2.17091
ENSMUSG00000020865	2.4002	1.66965e-06	0.000114246	up	11:-:94343295-94392997	11:-:94343295-94392997	ENSMUSG00000020865	76408	B2RX12	Abcc3	ATP binding cassette subfamily C member 3 [Source:HGNC Symbol;Acc:HGNC:54]	5.96237	5.93577	4.41508	2.69429	3.56873	3.30395	0.44688	0.49799	0.42029	1.05659
ENSMUSG00000034845	1.26993	1.44662e-06	0.000107255	up	8:-:71497765-71511752	8:-:71497765-71511752	ENSMUSG00000034845	84094	Q91VC4	Plvap	plasmalemma vesicle associated protein [Source:HGNC Symbol;Acc:HGNC:13635]	32.6369	41.5349	32.069	30.8727	35.455	24.6496	9.07507	15.4549	7.70723	12.4669
ENSMUSG00000059811	-1.2288027977382	1.27415e-06	0.000101343	down	17:-:79848390-79896123	17:-:79848390-79896123	ENSMUSG00000059811	56298	Q6PA06	Atl2	atlastin GTPase 2	8.95042	7.0259	7.89286	11.3148	9.95563	12.1191	20.609	17.6091	22.3303	18.7298
ENSMUSG00000045322	2.56418	1.52843e-06	0.0001093	up	9:+:106222598-106226883	9:+:106222598-106226883	ENSMUSG00000045322	81897	Q9EQU3	Tlr9	Toll-like receptor 9 [Source:UniProtKB/Swiss-Prot;Acc:Q9EQU3]	4.16132	3.27549	2.38131	2.47482	4.51471	3.48292	0.28388	0.65269	0.21744	0.577
ENSMUSG00000022150	1.27683	1.36775e-06	0.000104858	up	15:+:6299788-6440712	15:+:6299788-6440712	ENSMUSG00000022150	13132	A0A0R4J104	Dab2	DAB2, clathrin adaptor protein [Source:HGNC Symbol;Acc:HGNC:2662]	22.7215	35.2946	26.4388	19.5188	22.4438	18.6061	7.06374	10.1087	7.84551	9.19941
ENSMUSG00000032359	1.63328	1.46171e-06	0.000107557	up	9:+:90054152-90076089	9:+:90054152-90076089	ENSMUSG00000032359	13036	P49935	Ctsh	cathepsin H [Source:MGI Symbol;Acc:MGI:107285]	29.991	35.9565	22.2058	17.4328	21.6229	20.1996	6.13334	9.15232	4.56658	6.0915
ENSMUSG00000001983	-1.12493980523437	1.54539e-06	0.0001093	down	11:+:106066061-106073612	11:+:106066061-106073612	ENSMUSG00000001983	70207	Q8K0Z7	Taco1	Translational activator of cytochrome c oxidase 1 [Source:UniProtKB/Swiss-Prot;Acc:Q8K0Z7]	16.3033	12.7769	12.9503	18.0674	16.4868	17.7833	28.8574	27.5846	26.5666	23.4891
ENSMUSG00000044811	4.27601	1.40876e-06	0.000105787	up	11:-:114996721-115001880	11:-:114996721-115001880	ENSMUSG00000044811	140497	Q7TSN2	Cd300c2	CD300C molecule 2 [Source:MGI Symbol;Acc:MGI:2153249]	26.407	27.4007	19.1221	10.5294	13.5894	11.3517	0.77439	0.7913	0.39543	0.59024
ENSMUSG00000031286	-1.40967848813012	1.7933e-06	0.000118578	down	3:-:85869849-85887516	3:-:85869849-85887516	ENSMUSG00000031286	320302	Q8BML3	Glt28d2	glycosyltransferase 28 domain containing 2	1.35693	1.11197	1.3263	1.975	1.38733	1.0749	2.37765	2.9082	2.58361	2.20368
ENSMUSG00000054520	1.87202	1.7896e-06	0.000118578	up	5:+:34525838-34563641	5:+:34525838-34563641	ENSMUSG00000054520	24055	Q3UD40	Sh3bp2	SH3-domain binding protein 2 [Source:MGI Symbol;Acc:MGI:1346349]	6.19416	6.97719	5.95234	4.06699	4.55133	3.45448	0.89513	1.46781	0.58679	1.22623
ENSMUSG00000010492	-1.60285226670868	1.7485e-06	0.000117446	down	2:+:181578480-181585170	2:+:181578480-181585170	ENSMUSG00000010492	100271841	-	Uckl1os	uridine-cytidine kinase 1-like 1, opposite strand	2.61766	1.94738	3.44818	3.56575	3.62591	2.93181	8.88077	6.92578	5.57249	5.44575
ENSMUSG00000031147	-1.38743858628552	1.81486e-06	0.000118639	down	X:-:7673164-7681251	X:-:7673164-7681251	ENSMUSG00000031147	54634	Q4KL35	Magix	PDZ domain-containing protein MAGIX [Source:UniProtKB/Swiss-Prot;Acc:Q4KL35]	1.32628	1.14835	1.86776	1.87627	1.42651	1.45966	3.1251	2.86032	2.16569	3.01713
ENSMUSG00000038217	-1.21098886238726	1.74777e-06	0.000117446	down	11:+:75461715-75470899	11:+:75461715-75470899	ENSMUSG00000038217	380712	Q8VC26	Tlcd2	TLC domain-containing protein 2 [Source:UniProtKB/Swiss-Prot;Acc:Q8VC26]	5.77076	4.34136	4.41168	4.61188	4.133	4.95686	9.23361	9.21754	7.74749	6.25188
ENSMUSG00000044350	1.41445	1.80487e-06	0.000118578	up	14:-:77024200-77036904	14:-:77024200-77036904	ENSMUSG00000044350	210808	Q8BZT9	Lacc1	Laccase domain-containing protein 1 [Source:UniProtKB/Swiss-Prot;Acc:Q8BZT9]	5.44896	5.53003	4.85817	4.01906	6.02606	4.6626	0.95546	2.26687	1.10686	1.42843
ENSMUSG00000024726	-1.51182902414718	1.49342e-06	0.000108892	down	19:+:18670780-18704788	19:+:18670780-18704788	ENSMUSG00000024726	67383	Q80UY1	Carnmt1	carnosine N-methyltransferase 1	11.2985	13.7602	14.1174	20.6227	24.007	20.6999	38.589	43.6271	37.632	38.048
ENSMUSG00000028497	1.52102	1.74707e-06	0.000117446	up	4:-:88396144-88438928	4:-:88396144-88438928	ENSMUSG00000028497	66775	A2AKM2	Hacd4	Very-long-chain (3R)-3-hydroxyacyl-CoA dehydratase 4 [Source:UniProtKB/Swiss-Prot;Acc:A2AKM2]	4.92342	5.71818	3.24864	3.67	5.19156	3.95084	0.82302	1.57736	0.90484	1.42024
ENSMUSG00000048406	-1.31823174122041	1.80584e-06	0.000118578	down	4:+:141546189-141547892	4:+:141546189-141547892	ENSMUSG00000048406	320456	Q3UG47,Q8BNQ7	B330016D10Rik	RIKEN cDNA B330016D10 gene [Source:MGI Symbol;Acc:MGI:2444063]	4.56775	3.39331	4.38211	3.13431	3.43073	3.26785	6.84324	5.70887	7.55815	6.56257
ENSMUSG00000054027	-1.01696892241851	1.51585e-06	0.0001093	down	10:+:86779005-86838389	10:+:86779005-86838389	ENSMUSG00000054027	103466	Q3UHB1	Nt5dc3	5'-nucleotidase domain containing 3	6.39435	5.1357	5.83678	7.01829	7.11438	6.76023	11.9182	9.81985	10.2552	9.91252
ENSMUSG00000058099	2.02935	1.78598e-06	0.000118578	up	15:-:82992973-83033306	15:-:82992973-83033306	ENSMUSG00000058099	74039	Q8R4V1	Nfam1	NFAT activation molecule 1 [Source:UniProtKB/Swiss-Prot;Acc:Q8R4V1]	4.75331	5.86998	5.21534	3.07874	4.22716	3.3951	0.45641	1.51115	0.55351	1.03079
ENSMUSG00000038201	-1.45322089674063	1.53071e-06	0.0001093	down	7:+:45405653-45409763	7:+:45405653-45409763	ENSMUSG00000038201	16495	Q17ST2	Kcna7	Potassium voltage-gated channel subfamily A member 7 [Source:UniProtKB/Swiss-Prot;Acc:Q17ST2]	15.7561	9.16569	19.2394	15.8084	18.5007	15.3811	31.4606	35.112	37.865	33.1673
ENSMUSG00000042129	1.18836	1.63101e-06	0.000112655	up	6:-:116633008-116673952	6:-:116633008-116673952	ENSMUSG00000042129	213391	Q8CB96	Rassf4	Ras association domain-containing protein 4 [Source:UniProtKB/Swiss-Prot;Acc:Q8CB96]	7.52724	7.4224	5.26687	5.92193	7.45405	6.6169	1.72674	3.06076	1.94355	2.88743
ENSMUSG00000036478	1.00761	1.53566e-06	0.0001093	up	10:+:96617006-96622809	10:+:96617006-96622809	ENSMUSG00000036478	12226	Q3UEG0	Btg1	B cell translocation gene 1, anti-proliferative	20.8001	26.9665	19.5831	16.9596	18.6437	19.4214	7.79094	10.9358	7.26254	8.20168
ENSMUSG00000063428	-1.37333498661319	1.68524e-06	0.000115044	down	10:+:40630011-40681847	10:+:40630011-40681847	ENSMUSG00000063428	70503	Q922Z0	Ddo	D-aspartate oxidase [Source:UniProtKB/Swiss-Prot;Acc:Q922Z0]	1.59318	1.49768	2.31414	2.36786	2.72328	2.1916	4.61725	4.21087	3.90487	3.9771
ENSMUSG00000040249	1.20107	1.32034e-06	0.000103113	up	10:-:127538161-127621148	10:-:127538161-127621148	ENSMUSG00000040249	16971	Q91ZX7	Lrp1	LDL receptor related protein 1 [Source:HGNC Symbol;Acc:HGNC:6692]	53.8668	56.5531	57.1776	40.719	41.5294	38.5906	15.7655	24.1736	17.3054	20.8702
ENSMUSG00000053113	1.71654	1.86422e-06	0.000120074	up	11:-:117966079-117970047	11:-:117966079-117970047	ENSMUSG00000053113	12702	O35718	Socs3	suppressor of cytokine signaling 3 [Source:MGI Symbol;Acc:MGI:1201791]	6.93848	11.6991	13.5005	8.0432	9.30205	10.5932	2.31878	2.59557	1.56955	2.3211
ENSMUSG00000039670	-1.0520713940596	1.90138e-06	0.000121847	down	11:-:120456606-120458068	11:-:120456606-120458068	ENSMUSG00000039670	66431	Q9CR10	Oxld1	Oxidoreductase-like domain-containing protein 1 [Source:UniProtKB/Swiss-Prot;Acc:Q9CR10]	11.1185	10.5249	11.0149	10.9033	10.5819	9.61074	18.7921	18.6146	11.9377	15.659
ENSMUSG00000022575	1.00942	1.86552e-06	0.000120074	up	15:+:75862327-75867408	15:+:75862327-75867408	ENSMUSG00000022575	69146	Q9D8T2	Gsdmd	gasdermin D	10.8744	13.2064	10.3005	9.21496	10.8073	8.64805	3.69467	4.48323	3.02249	4.45878
ENSMUSG00000022579	-1.07275069106512	1.64175e-06	0.000112865	down	15:+:75596628-75599481	15:+:75596628-75599481	ENSMUSG00000022579	68453	Q9D1N2	Gpihbp1	GPI-anchored HDL-binding protein 1 [Source:MGI Symbol;Acc:MGI:1915703]	13.4413	13.3022	14.9373	15.2915	11.613	14.9476	28.1804	28.8868	18.0132	21.6328
ENSMUSG00000042549	-1.42631072543146	1.99123e-06	0.000124075	down	11:-:60920917-60931867	11:-:60920917-60931867	ENSMUSG00000042549	24082	Q9D6Q1,Q9D7C0,Q9D6R7	Map2k3os	mitogen-activated protein kinase kinase 3, opposite strand	3.57957	2.66689	3.40814	2.08974	3.26205	3.37142	6.92342	6.00776	4.63753	5.58638
ENSMUSG00000040613	3.03404	1.97266e-06	0.000123748	up	6:-:122577792-122602444	6:-:122577792-122602444	ENSMUSG00000040613	11810	P51908	Apobec1	apolipoprotein B mRNA editing enzyme, catalytic polypeptide 1 [Source:MGI Symbol;Acc:MGI:103298]	24.6771	27.8831	21.7438	10.6978	14.6507	11.4506	1.51936	2.75379	0.74637	1.90321
ENSMUSG00000035004	2.56251	2.00221e-06	0.000124099	up	7:-:121064067-121074572	7:-:121064067-121074572	ENSMUSG00000035004	80719	P0C6B7	Igsf6	Immunoglobulin superfamily member 6 [Source:UniProtKB/Swiss-Prot;Acc:P0C6B7]	11.9777	14.7356	9.42456	5.31596	9.84713	8.89669	0.9318	1.79749	0.63746	1.70118
ENSMUSG00000002012	-1.26614594502929	2.00433e-06	0.000124099	down	X:-:73655994-73660117	X:-:73655994-73660117	ENSMUSG00000002012	93843	Q9QYK9	Pnck	pregnancy upregulated non-ubiquitously expressed CaM kinase [Source:MGI Symbol;Acc:MGI:1347357]	2.62802	2.49177	2.44243	2.15093	2.89972	2.28809	5.27305	3.90308	3.32534	4.6136
ENSMUSG00000006403	1.06935	1.86078e-06	0.000120074	up	1:+:171250421-171260637	1:+:171250421-171260637	ENSMUSG00000006403	240913	Q3TNX8	Adamts4	A disintegrin and metalloproteinase with thrombospondin motifs 4 [Source:UniProtKB/Swiss-Prot;Acc:Q8BNJ2]	7.90774	7.71582	6.45701	5.72902	5.80353	6.59586	2.48485	2.07131	2.3846	2.79015
ENSMUSG00000055775	1.96877	1.31606e-06	0.000103053	up	11:+:67277124-67308634	11:+:67277124-67308634	ENSMUSG00000055775	17885	P13542	Myh8	Myosin-8 [Source:UniProtKB/Swiss-Prot;Acc:P13542]	211.275	125.68	207.042	300.776	265.616	250.666	56.4464	39.6169	62.0848	76.2072
ENSMUSG00000047067	-1.14900613479459	1.82713e-06	0.000118646	down	1:+:92906981-92908435	1:+:92906981-92908435	ENSMUSG00000047067	67446	Q8BTR5	Dusp28	Dual specificity phosphatase 28 [Source:UniProtKB/Swiss-Prot;Acc:Q8BTR5]	11.7874	10.2882	10.9909	12.4167	11.9041	15.1652	19.9717	19.3874	23.5492	19.4726
ENSMUSG00000039145	1.09946	1.96105e-06	0.000123748	up	2:-:5293457-5714515	2:-:5293457-5714515	ENSMUSG00000039145	227541	Q8BW96	Camk1d	calcium/calmodulin-dependent protein kinase ID [Source:MGI Symbol;Acc:MGI:2442190]	3.43246	3.59951	3.10847	3.10491	3.51557	2.56303	0.80464	1.34146	1.06068	1.34259
ENSMUSG00000021998	2.10832	1.69678e-06	0.000115295	up	14:+:75131101-75230842	14:+:75131101-75230842	ENSMUSG00000021998	18826	Q61233	Lcp1	Plastin-2 [Source:UniProtKB/Swiss-Prot;Acc:Q61233]	17.8573	27.4735	19.7763	11.2127	17.7624	10.9084	2.37849	5.48034	2.49328	3.35869
ENSMUSG00000021622	-1.12013671508083	1.45924e-06	0.000107557	down	13:-:91853387-91876885	13:-:91853387-91876885	ENSMUSG00000021622	76722	Q6P8J7	Ckmt2	Creatine kinase S-type, mitochondrial [Source:UniProtKB/Swiss-Prot;Acc:Q6P8J7]	134.748	126.886	185.876	178.741	165.829	172.635	359.809	402.021	302.427	269.337
ENSMUSG00000079547	1.97145	2.07275e-06	0.000125678	up	17:+:34153072-34160230	17:+:34153072-34160230	ENSMUSG00000079547	14999	Q31094	H2-DMb1	histocompatibility 2, class II, locus Mb1 [Source:MGI Symbol;Acc:MGI:95922]	8.07051	9.98997	6.06524	9.12692	10.2903	9.21669	1.04982	1.69851	1.14585	2.70279
ENSMUSG00000085218	-1.95708839563561	1.8245e-06	0.000118646	down	2:-:106642914-106650364	2:-:106642914-106650364	ENSMUSG00000085218	102640562	-	BB218582	expressed sequence BB218582	0.77472	0.77241	1.10556	0.88194	1.00958	1.08	3.32962	2.64542	2.16321	2.10479
ENSMUSG00000047746	-1.7076438543163	1.62149e-06	0.000112401	down	16:-:36963460-36990467	16:-:36963460-36990467	ENSMUSG00000047746	207215	P62932	Fbxo40	Mus musculus F-box protein 40 (Fbxo40), transcript variant 1, mRNA. [Source:RefSeq mRNA;Acc:NM_001358217]	11.3955	5.85519	10.0487	14.3325	14.8741	13.963	31.0552	33.6945	30.3971	32.2148
ENSMUSG00000005087	1.53871	1.70885e-06	0.000115846	up	2:-:102811141-102901665	2:-:102811141-102901665	ENSMUSG00000005087	12505	P15379	Cd44	CD44 molecule (Indian blood group) [Source:HGNC Symbol;Acc:HGNC:1681]	20.8047	30.5016	25.0644	15.6984	16.9848	15.184	5.22266	7.94728	4.47364	6.16395
ENSMUSG00000003882	3.04979	1.79205e-06	0.000118578	up	15:-:9505788-9530176	15:-:9505788-9530176	ENSMUSG00000003882	16197	Q8C9W4	Il7r	interleukin 7 receptor	2.60284	2.72541	2.09808	1.901	3.61253	1.7881	0.07801	0.48682	0.14867	0.29588
ENSMUSG00000024440	-1.45178455329558	1.88072e-06	0.000120787	down	18:-:38267092-38284402	18:-:38267092-38284402	ENSMUSG00000024440	53601	Q8C883	Pcdh12	Protocadherin-12 [Source:UniProtKB/Swiss-Prot;Acc:O55134]	2.02124	2.12394	2.7442	3.99941	3.00063	3.21308	6.36807	6.8212	5.06879	5.27184
ENSMUSG00000097076	-1.98640445065621	1.54196e-06	0.0001093	down	10:-:84547417-84553338	10:-:84547417-84553338	ENSMUSG00000097076	442847	-	Platr7	pluripotency associated transcript 7	0.45682	0.53137	0.46564	0.72228	0.76668	0.70758	1.63611	1.55988	1.55901	1.92747
ENSMUSG00000060216	1.45238	1.9733e-06	0.000123748	up	11:+:70432635-70440828	11:+:70432635-70440828	ENSMUSG00000060216	216869	A0A158SIT9	Arrb2	Beta-arrestin-2 [Source:UniProtKB/Swiss-Prot;Acc:Q91YI4]	16.7966	19.434	15.0106	10.4085	11.7786	10.4511	3.39742	4.74313	3.47782	3.85757
ENSMUSG00000026888	-1.38214731308986	2.11011e-06	0.000126633	down	2:-:64912476-65024987	2:-:64912476-65024987	ENSMUSG00000026888	50915	A2ASX2	Grb14	Growth factor receptor-bound protein 14 [Source:UniProtKB/Swiss-Prot;Acc:Q9JLM9]	0.92589	0.6765	1.05184	1.09963	0.9378	0.82473	1.8443	2.31692	1.14904	1.74567
ENSMUSG00000028992	-1.04630517750659	2.05805e-06	0.000125273	down	4:-:149467572-149485202	4:-:149467572-149485202	ENSMUSG00000028992	66454	Q3V449	Nmnat1	Nicotinamide/nicotinic acid mononucleotide adenylyltransferase 1 [Source:UniProtKB/Swiss-Prot;Acc:Q9EPA7]	3.04328	2.96755	3.01685	3.46871	3.82324	3.47066	4.91084	5.58523	5.18782	4.48098
ENSMUSG00000023019	-1.30018136543081	1.49667e-06	0.000108892	down	15:+:99717515-99725005	15:+:99717515-99725005	ENSMUSG00000023019	14555	P13707	Gpd1	glycerol-3-phosphate dehydrogenase 1 (soluble) [Source:MGI Symbol;Acc:MGI:95679]	72.1522	67.3038	86.7798	103.521	117.865	94.0233	221.465	217.218	209.497	167.828
ENSMUSG00000073411	1.3943	1.62349e-06	0.000112401	up	17:+:35262730-35267499	17:+:35262730-35267499	ENSMUSG00000073411	14964	Q792Z7	H2-D1	H-2 class I histocompatibility antigen, D-B alpha chain [Source:UniProtKB/Swiss-Prot;Acc:P01899]	106.665	137.446	95.0172	122.865	146.963	107.686	36.3096	61.9079	28.0042	42.0681
ENSMUSG00000078190	1.63542	1.99725e-06	0.000124099	up	1:+:162217623-162225550	1:+:162217623-162225550	ENSMUSG00000078190	474332	Q62078,Q3UYS8	Dnm3os	dynamin 3, opposite strand	6.68732	8.16827	8.59899	5.12061	4.45444	4.87489	1.48137	1.72596	1.15264	1.84311
ENSMUSG00000048416	-1.15858981334899	1.59068e-06	0.000110916	down	3:+:67374097-67400003	3:+:67374097-67400003	ENSMUSG00000048416	17349	Q3V042	Mlf1	Myeloid leukemia factor 1 [Source:UniProtKB/Swiss-Prot;Acc:Q9QWV4]	62.5699	66.5665	91.4823	94.7636	94.3546	98.2903	181.835	181.431	180.486	148.191
ENSMUSG00000025732	-1.10326218676602	1.95909e-06	0.000123748	down	17:-:25863698-25868738	17:-:25863698-25868738	ENSMUSG00000025732	68241	Q9CQB2	Mcrip2	MAPK regulated corepressor interacting protein 2	20.4749	21.7171	22.4563	20.9392	20.2013	22.7496	41.7128	46.4428	28.8849	28.3592
ENSMUSG00000025888	2.14805	1.91335e-06	0.000122079	up	9:+:5298517-5307265	9:+:5298517-5307265	ENSMUSG00000025888	12362	P29452	Casp1	caspase 1	4.74921	6.15563	3.94192	3.94761	6.71141	3.53802	0.65955	0.92669	0.67358	0.67028
ENSMUSG00000078945	2.47929	2.09376e-06	0.000126304	up	13:-:100144063-100202092	13:-:100144063-100202092	ENSMUSG00000078945	17948	Q9QUK4	Naip2	NLR family, apoptosis inhibitory protein 2 [Source:MGI Symbol;Acc:MGI:1298226]	2.25305	3.13445	2.53157	1.8027	2.3712	1.54744	0.12868	0.54651	0.29911	0.28471
ENSMUSG00000036887	2.63193	1.85276e-06	0.000120044	up	4:-:136895917-136898803	4:-:136895917-136898803	ENSMUSG00000036887	12259	P98086	C1qa	Complement C1q subcomponent subunit A [Source:UniProtKB/Swiss-Prot;Acc:P98086]	300.448	394.49	188.489	127.913	146.355	140.327	24.7338	45.9589	14.1799	29.0048
ENSMUSG00000029299	2.27922	2.22265e-06	0.000130185	up	5:-:104935057-104982718	5:-:104935057-104982718	ENSMUSG00000029299	27405	Q99P81	Abcg3	ATP binding cassette subfamily G member 3 [Source:MGI Symbol;Acc:MGI:1351624]	4.5919	4.79219	2.97459	2.37034	4.1181	2.92481	0.29277	0.79932	0.42606	0.70663
ENSMUSG00000024851	1.11034	2.17773e-06	0.000128843	up	19:+:4099998-4113965	19:+:4099998-4113965	ENSMUSG00000024851	18739	O35954	Pitpnm1	Membrane-associated phosphatidylinositol transfer protein 1 [Source:UniProtKB/Swiss-Prot;Acc:O35954]	3.76687	4.22605	4.035	3.69239	4.79441	3.40261	1.11641	1.73913	1.04289	1.76605
ENSMUSG00000066800	1.091	2.11501e-06	0.000126667	up	1:+:153749426-153764221	1:+:153749426-153764221	ENSMUSG00000066800	24014	B2RQP1	Rnasel	ribonuclease L (2', 5'-oligoisoadenylate synthetase-dependent) [Source:MGI Symbol;Acc:MGI:1098272]	5.39867	5.80195	4.23245	5.67771	5.18181	5.49588	1.3772	2.35479	1.69867	2.34195
ENSMUSG00000015852	2.75546	2.19627e-06	0.000129157	up	3:-:87250758-87263738	3:-:87250758-87263738	ENSMUSG00000015852	80891	Q9EQY5	Fcrls	Fc receptor-like S, scavenger receptor	41.6226	53.5386	25.4605	21.0813	18.5073	20.0637	2.73856	5.10617	2.61915	2.68694
ENSMUSG00000018930	4.65708	4.44162e-07	5.79712e-05	up	11:+:83662584-83664683	11:+:83662584-83664683	ENSMUSG00000018930	20303	Q5QNV9	Ccl4	C-C motif chemokine 4 [Source:UniProtKB/Swiss-Prot;Acc:P14097]	1.00026	2.30144	2.03918	1.45988	1.09385	0.39727	0	0	0	0
ENSMUSG00000040829	1.77424	2.27321e-06	0.000132881	up	11:+:70459433-70466202	11:+:70459433-70466202	ENSMUSG00000040829	574428	A2CFF1	Zmynd15	zinc finger, MYND-type containing 15 [Source:MGI Symbol;Acc:MGI:3603821]	2.25752	1.76849	1.66715	2.02508	2.03313	2.04574	0.53038	0.41476	0.35735	0.2987
ENSMUSG00000097184	-1.82487382123449	2.15353e-06	0.000127928	down	16:+:30008667-30021430	16:+:30008667-30021430	ENSMUSG00000097184	100043102	-	4632428C04Rik	RIKEN cDNA 4632428C04 gene	0.56425	0.47923	0.51125	0.58155	0.69322	0.69057	1.86051	1.66076	1.1152	1.18716
ENSMUSG00000039063	-1.21571336337939	2.41319e-06	0.000137228	down	2:-:6188465-6213033	2:-:6188465-6213033	ENSMUSG00000039063	67856	Q9D7J9	Echdc3	Enoyl-CoA hydratase domain-containing protein 3, mitochondrial [Source:UniProtKB/Swiss-Prot;Acc:Q9D7J9]	1.66438	1.6783	1.40736	1.72249	1.54605	1.54292	2.8257	2.37198	2.1594	3.10646
ENSMUSG00000032010	-1.29659935979462	1.82617e-06	0.000118646	down	9:+:44067021-44095627	9:+:44067021-44095627	ENSMUSG00000032010	53376	O88623	Usp2	ubiquitin specific peptidase 2 [Source:MGI Symbol;Acc:MGI:1858178]	15.473	10.4563	17.5876	17.2385	17.3942	17.5997	29.1108	32.8373	43.1132	31.656
ENSMUSG00000035448	3.22883	1.23433e-06	0.000100206	up	9:+:124021972-124031689	9:+:124021972-124031689	ENSMUSG00000035448	12771	Q3U5L7	Ccr3	Probable C-C chemokine receptor type 3 [Source:UniProtKB/Swiss-Prot;Acc:P51678]	1.48996	1.45458	1.7244	1.23679	1.78352	2.19568	0.06353	0.30835	0.0963	0.09583
ENSMUSG00000021388	1.08944	1.79825e-06	0.000118578	up	13:+:49544443-49567565	13:+:49544443-49567565	ENSMUSG00000021388	66695	Q99MQ4	Aspn	Asporin [Source:UniProtKB/Swiss-Prot;Acc:Q99MQ4]	158.863	154.089	123.142	114.989	109.104	116.04	45.7185	78.3526	41.363	61.1946
ENSMUSG00000109841	-2.00686922333077	1.95287e-06	0.000123748	down	16:-:78250861-78302487	16:-:78250861-78302487	ENSMUSG00000109841	100503619	-	E330011O21Rik	RIKEN cDNA E330011O21 gene	0.22296	0.22229	0.34964	0.39048	0.32509	0.31878	1.01791	0.83054	0.63852	0.88955
ENSMUSG00000004266	2.16414	2.46264e-06	0.000139442	up	6:-:124720707-124738714	6:-:124720707-124738714	ENSMUSG00000004266	15170	Q3UB72	Ptpn6	protein tyrosine phosphatase, non-receptor type 6 [Source:MGI Symbol;Acc:MGI:96055]	13.484	17.0037	13.8923	7.81726	13.677	7.33633	1.63205	2.40796	1.21455	2.75293
ENSMUSG00000026271	4.18577	1.34936e-06	0.000104361	up	1:+:92950865-92986391	1:+:92950865-92986391	ENSMUSG00000026271	64095	Q9ES90	Gpr35	G protein-coupled receptor 35 [Source:MGI Symbol;Acc:MGI:1929509]	2.35076	3.29593	2.42826	1.23451	1.76544	1.80976	0.07517	0.18243	0.02605	0.09072
ENSMUSG00000029205	-1.90296611318433	2.58282e-06	0.000143803	down	5:+:65934921-65977326	5:+:65934921-65977326	ENSMUSG00000029205	231252	G3X8Z7	Chrna9	cholinergic receptor, nicotinic, alpha polypeptide 9 [Source:MGI Symbol;Acc:MGI:1202403]	0.83911	0.85334	1.84748	0.72174	1.05372	1.50769	3.14268	2.35474	3.0407	3.19161
ENSMUSG00000018774	2.93417	2.40733e-06	0.000137162	up	11:-:69664213-69666153	11:-:69664213-69666153	ENSMUSG00000018774	12514	P31996	Cd68	Macrosialin [Source:UniProtKB/Swiss-Prot;Acc:P31996]	75.3862	113.71	78.4897	32.7049	50.7329	48.9355	4.17546	12.5914	3.96079	7.2841
ENSMUSG00000026979	2.13761	2.55981e-06	0.000143339	up	2:+:24367580-24414954	2:+:24367580-24414954	ENSMUSG00000026979	215632	Q8BLR5	Psd4	PH and SEC7 domain-containing protein 4 [Source:UniProtKB/Swiss-Prot;Acc:Q8BLR5]	1.07287	1.22434	1.13752	0.69761	1.29654	0.78308	0.11905	0.33171	0.11229	0.15431
ENSMUSG00000038370	-1.2355517464848	2.46641e-06	0.000139442	down	1:-:171173262-171196268	1:-:171173262-171196268	ENSMUSG00000038370	66425	Q6W8Q3	Pcp4l1	Purkinje cell protein 4-like protein 1 [Source:UniProtKB/Swiss-Prot;Acc:Q6W8Q3]	5.86078	7.51289	7.09002	4.07321	5.37906	7.08287	11.4015	11.9956	8.3123	11.2144
ENSMUSG00000036896	2.45058	2.12951e-06	0.000127275	up	4:-:136889804-136893065	4:-:136889804-136893065	ENSMUSG00000036896	12262	Q02105	C1qc	Complement C1q subcomponent subunit C [Source:UniProtKB/Swiss-Prot;Acc:Q02105]	148.508	181.472	99.7744	54.3216	71.1283	74.0023	14.6129	20.5401	10.8354	13.7703
ENSMUSG00000071203	2.66899	2.37718e-06	0.000136506	up	13:-:100211739-100246323	13:-:100211739-100246323	ENSMUSG00000071203	17951	Q9R016	Naip5	NLR family, apoptosis inhibitory protein 5 [Source:MGI Symbol;Acc:MGI:1298220]	1.75651	2.07236	2.54641	1.2837	2.30057	1.84406	0.09986	0.47256	0.15743	0.27717
ENSMUSG00000084929	-1.31442785678151	2.30966e-06	0.000134742	down	4:+:120291350-120303892	4:+:120291350-120303892	ENSMUSG00000084929	402730	-	Foxo6os	forkhead box O6, opposite strand	9.04379	5.70187	7.88543	9.5048	7.95677	10.0485	15.583	15.4684	19.2008	14.4533
ENSMUSG00000025232	1.43745	2.10033e-06	0.000126304	up	9:+:59539540-59565109	9:+:59539540-59565109	ENSMUSG00000025232	15211	P29416	Hexa	Beta-hexosaminidase subunit alpha [Source:UniProtKB/Swiss-Prot;Acc:P29416]	89.6329	103.42	63.6154	57.6051	59.1368	60.9258	19.7866	32.4447	17.0184	21.5223
ENSMUSG00000024810	2.02437	2.52642e-06	0.000142354	up	19:+:29925114-29960718	19:+:29925114-29960718	ENSMUSG00000024810	77125	Q8BVZ5	Il33	Interleukin-33 Interleukin-33(102-266) Interleukin-33(109-266) [Source:UniProtKB/Swiss-Prot;Acc:Q8BVZ5]	14.4641	27.2632	15.3175	10.4164	11.0067	12.8465	2.37682	3.29924	2.33656	2.86838
ENSMUSG00000028737	-1.16215256728674	2.34806e-06	0.000135365	down	4:+:139622866-139649690	4:+:139622866-139649690	ENSMUSG00000028737	212647	Q8CHT0	Aldh4a1	Delta-1-pyrroline-5-carboxylate dehydrogenase, mitochondrial [Source:UniProtKB/Swiss-Prot;Acc:Q8CHT0]	3.40483	3.59076	3.56554	4.98744	4.62215	4.13577	7.2013	7.42755	7.79583	5.72559
ENSMUSG00000056888	2.79129	1.49845e-06	0.000108892	up	10:-:111985448-112002631	10:-:111985448-112002631	ENSMUSG00000056888	73690	Q4QQK5	Glipr1	Glioma pathosis-related protein 1 [Source:UniProtKB/Swiss-Prot;Acc:Q9CWG1]	3.45572	3.41264	3.35474	1.79007	2.84627	2.20907	0.20207	0.32693	0.20422	0.36579
ENSMUSG00000027313	-2.56396942115663	2.75099e-06	0.000148673	down	2:+:119351229-119354381	2:+:119351229-119354381	ENSMUSG00000027313	69065	Q8R3J5	Chac1	Glutathione-specific gamma-glutamylcyclotransferase 1 [Source:UniProtKB/Swiss-Prot;Acc:Q8R3J5]	2.48174	2.01042	1.51781	3.25685	1.54355	5.12546	11.555	13.1353	13.6284	6.05295
ENSMUSG00000052336	3.08484	2.8272e-06	0.000151316	up	9:-:119901616-120069879	9:-:119901616-120069879	ENSMUSG00000052336	13051	Q9Z0D9	Cx3cr1	CX3C chemokine receptor 1 [Source:UniProtKB/Swiss-Prot;Acc:Q9Z0D9]	14.5303	13.8352	7.58358	5.03325	6.971	5.82018	0.63443	1.03579	0.47563	0.80741
ENSMUSG00000090066	-1.32466400968041	1.98301e-06	0.000123991	down	3:+:138065052-138081506	3:+:138065052-138081506	ENSMUSG00000090066	102634333	E0CYV9	1110002E22Rik	RIKEN cDNA 1110002E22 gene [Source:MGI Symbol;Acc:MGI:1915066]	17.8791	13.4961	22.2577	19.4477	25.9348	21.7459	46.1133	41.1656	59.0001	40.4455
ENSMUSG00000052837	1.44958	2.61316e-06	0.000144667	up	8:-:84974484-84978718	8:-:84974484-84978718	ENSMUSG00000052837	16477	P09450	Junb	Transcription factor jun-B [Source:UniProtKB/Swiss-Prot;Acc:P09450]	20.4587	24.3367	21.0789	12.6459	13.622	18.0041	4.49422	5.8371	5.34082	4.79683
ENSMUSG00000048865	2.25668	2.73537e-06	0.000148624	up	1:+:171388954-171410298	1:+:171388954-171410298	ENSMUSG00000048865	226652	E9QMX7	Arhgap30	Rho GTPase activating protein 30 [Source:HGNC Symbol;Acc:HGNC:27414]	6.08848	7.40823	6.59172	3.21509	6.28156	3.35112	0.64118	1.2331	0.52818	1.11688
ENSMUSG00000044986	-1.33617187306487	2.83143e-06	0.000151316	down	15:-:78399556-78405907	15:-:78399556-78405907	ENSMUSG00000044986	22117	Q545S0	Tst	thiosulfate sulfurtransferase, mitochondrial	4.21709	6.01916	5.02253	7.07478	6.83654	6.60082	12.4464	10.6933	10.4669	9.37408
ENSMUSG00000038506	-1.01701576996212	2.31851e-06	0.000134913	down	8:-:13255963-13288131	8:-:13255963-13288131	ENSMUSG00000038506	102323	Q8BZJ7	Dcun1d2	DCN1-like protein 2 [Source:UniProtKB/Swiss-Prot;Acc:Q8BZJ7]	7.92079	7.0852	7.94927	9.61972	9.66107	10.366	14.8459	13.4888	15.2248	14.6725
ENSMUSG00000039914	-1.05965491076436	2.13757e-06	0.000127497	down	10:-:128363100-128368997	10:-:128363100-128368997	ENSMUSG00000039914	210582	E9Q3H6	Coq10a	coenzyme Q10A	35.2301	29.1433	42.8112	45.3361	42.859	46.9574	71.7788	73.7668	84.184	70.8539
ENSMUSG00000035954	-1.00234585820873	2.39504e-06	0.00013707	down	12:+:40445952-40846874	12:+:40445952-40846874	ENSMUSG00000035954	238130	P59764	Dock4	dedicator of cytokinesis 4	1.28491	1.23912	1.40909	1.70933	1.61145	1.47782	1.98587	2.28593	2.63106	2.56346
ENSMUSG00000059325	-1.35964159153154	2.96706e-06	0.000156002	down	5:-:77086988-77115121	5:-:77086988-77115121	ENSMUSG00000059325	74318	Q8R1H0	Hopx	Homeodomain-only protein [Source:UniProtKB/Swiss-Prot;Acc:Q8R1H0]	3.0483	4.17478	3.44864	2.96597	2.57949	2.11005	6.17009	5.65684	5.03009	4.75726
ENSMUSG00000022667	2.28334	2.73512e-06	0.000148624	up	16:+:44765736-44794978	16:+:44765736-44794978	ENSMUSG00000022667	57781	Q9ES57	Cd200r1	Cell surface glycoprotein CD200 receptor 1 [Source:UniProtKB/Swiss-Prot;Acc:Q9ES57]	4.96841	6.1485	4.98804	2.93698	3.28315	3.45474	0.53652	0.80604	0.52673	0.52415
ENSMUSG00000006221	1.01693	2.05127e-06	0.000125273	up	4:+:141420779-141425311	4:+:141420779-141425311	ENSMUSG00000006221	29818	P35385	Hspb7	Heat shock protein beta-7 [Source:UniProtKB/Swiss-Prot;Acc:P35385]	225.175	243.12	261.043	202.795	176.769	175.974	89.4436	93.1168	93.3603	128.144
ENSMUSG00000041482	1.04061	2.68832e-06	0.000147516	up	18:-:63010213-63387183	18:-:63010213-63387183	ENSMUSG00000041482	667742	E9QNW4	Piezo2	Piezo-type mechanosensitive ion channel component 2 [Source:UniProtKB/Swiss-Prot;Acc:Q8CD54]	3.18655	3.18056	2.56935	2.11675	2.14774	2.49851	1.00607	1.06928	0.82639	1.00317
ENSMUSG00000024737	3.24052	2.98393e-06	0.000156328	up	19:+:10839727-10859362	19:+:10839727-10859362	ENSMUSG00000024737	65221	Q8BPX9	Slc15a3	Solute carrier family 15 member 3 [Source:UniProtKB/Swiss-Prot;Acc:Q8BPX9]	4.87388	6.78655	5.20371	2.64378	3.42935	2.44484	0.33123	0.57419	0.17216	0.25126
ENSMUSG00000063531	2.07774	2.87608e-06	0.000153143	up	5:+:14025276-14256689	5:+:14025276-14256689	ENSMUSG00000063531	20349	P70275	Sema3e	sema domain, immunoglobulin domain (Ig), short basic domain, secreted, (semaphorin) 3E [Source:MGI Symbol;Acc:MGI:1340034]	1.07746	1.16696	1.0035	0.59496	0.69978	0.74551	0.12873	0.13583	0.12217	0.17561
ENSMUSG00000032418	-1.28080617969345	2.52763e-06	0.000142354	down	9:-:86581371-86695953	9:-:86581371-86695953	ENSMUSG00000032418	17436	P06801	Me1	NADP-dependent malic enzyme [Source:UniProtKB/Swiss-Prot;Acc:P06801]	6.37423	7.09213	6.4032	10.2996	10.8816	8.53101	14.7471	14.2731	17.4259	17.4547
ENSMUSG00000031838	1.49223	2.68078e-06	0.000147516	up	8:-:70762774-70766663	8:-:70762774-70766663	ENSMUSG00000031838	65972	Q9ESY9	Ifi30	interferon gamma inducible protein 30 [Source:MGI Symbol;Acc:MGI:2137648]	78.4776	106.631	64.9025	46.8827	61.6334	60.2443	18.2225	25.1971	16.9599	17.5801
ENSMUSG00000042190	1.03188	2.74583e-06	0.000148673	up	5:-:113612354-113650426	5:-:113612354-113650426	ENSMUSG00000042190	14747	Q497D3	Cmklr1	Mus musculus chemokine-like receptor 1 (Cmklr1), transcript variant 1, mRNA. [Source:RefSeq mRNA;Acc:NM_001359060]	13.4705	13.0442	11.6802	12.0817	13.0809	12.833	3.49184	6.56845	3.97584	6.14618
ENSMUSG00000019864	-1.02279366768565	2.78632e-06	0.00015	down	10:+:43901807-43957201	10:+:43901807-43957201	ENSMUSG00000019864	170728	A0A0R4J0S3	Rtn4ip1	reticulon 4 interacting protein 1 [Source:MGI Symbol;Acc:MGI:2178759]	4.10365	3.80238	4.77399	3.82248	5.28428	4.00726	7.24601	6.35556	7.4314	6.19695
ENSMUSG00000025647	1.04761	2.62613e-06	0.000145111	up	9:+:109038565-109057777	9:+:109038565-109057777	ENSMUSG00000025647	66940	Q9D7I0	Shisa5	Protein shisa-5 [Source:UniProtKB/Swiss-Prot;Acc:Q9D7I0]	32.0222	36.8105	32.3268	23.2818	31.2942	24.3987	11.6636	14.918	9.30893	12.3448
ENSMUSG00000006576	1.13808	2.93398e-06	0.000154819	up	1:+:75546266-75562172	1:+:75546266-75562172	ENSMUSG00000006576	20536	Q68EG4	Slc4a3	solute carrier family 4 (anion exchanger), member 3 [Source:MGI Symbol;Acc:MGI:109350]	5.68123	5.17564	5.57427	3.90681	3.88997	4.15298	1.54103	1.65727	1.33387	2.2098
ENSMUSG00000048163	2.17759	3.30861e-06	0.00016764	up	5:-:113818536-113832644	5:-:113818536-113832644	ENSMUSG00000048163	20345	Q3TA56	Selplg	selectin, platelet (p-selectin) ligand [Source:MGI Symbol;Acc:MGI:106689]	6.87087	8.05936	6.51893	3.81919	7.40753	4.61549	0.54739	2.08124	0.81137	0.9542
ENSMUSG00000039763	-1.38016913870225	3.19377e-06	0.000164092	down	16:-:91614257-91619026	16:-:91614257-91619026	ENSMUSG00000039763	246738	Q8C4S9	Dnajc28	DnaJ homolog subfamily C member 28 [Source:UniProtKB/Swiss-Prot;Acc:Q8VCE1]	2.3096	1.54937	1.94731	3.30009	2.8206	2.54691	4.44963	4.83284	4.22857	4.45436
ENSMUSG00000030748	1.56936	2.77776e-06	0.000149815	up	7:+:125552120-125579474	7:+:125552120-125579474	ENSMUSG00000030748	16190	Q3U905	Il4ra	Interleukin-4 receptor subunit alpha Soluble interleukin-4 receptor subunit alpha [Source:UniProtKB/Swiss-Prot;Acc:P16382]	15.0097	25.9823	16.0069	12.7784	11.5472	12.3367	3.88748	5.09542	3.27603	4.35711
ENSMUSG00000052949	-1.36985569012404	2.79868e-06	0.000150389	down	11:-:116336353-116413032	11:-:116336353-116413032	ENSMUSG00000052949	217340	A2AAN9	Rnf157	ring finger protein 157 [Source:HGNC Symbol;Acc:HGNC:29402]	2.69968	1.88469	2.70298	3.01741	3.31182	2.96922	7.51944	4.93243	5.47152	5.04362
ENSMUSG00000074361	2.49537	2.16572e-06	0.000128391	up	7:-:16234585-16244154	7:-:16234585-16244154	ENSMUSG00000074361	319430	E9QQ21	C5ar2	complement component 5a receptor 2 [Source:HGNC Symbol;Acc:HGNC:4527]	1.36904	1.45028	1.17744	1.04622	0.91231	1.17809	0.08756	0.10625	0.15928	0.24656
ENSMUSG00000027322	2.7546	3.34111e-06	0.000168703	up	2:-:131069220-131086765	2:-:131069220-131086765	ENSMUSG00000027322	20612	G3X8X6	Siglec1	sialic acid binding Ig-like lectin 1, sialoadhesin [Source:MGI Symbol;Acc:MGI:99668]	4.09503	4.82713	4.00022	5.95314	10.1575	6.95967	0.36375	1.24472	0.44114	0.67603
ENSMUSG00000000957	1.22229	2.40104e-06	0.00013707	up	14:+:54431612-54445364	14:+:54431612-54445364	ENSMUSG00000000957	17387	P53690	Mmp14	Matrix metalloproteinase-14 [Source:UniProtKB/Swiss-Prot;Acc:P53690]	95.3794	79.3882	57.7043	57.5416	58.1932	73.0462	25.0326	38.8182	20.7464	27.1792
ENSMUSG00000031791	-1.08894950393301	2.19317e-06	0.000129157	down	8:+:72572055-72587282	8:+:72572055-72587282	ENSMUSG00000031791	74166	Q3TMP8	Tmem38a	transmembrane protein 38A [Source:MGI Symbol;Acc:MGI:1921416]	285.848	216.048	319.016	381.898	349.341	342.719	679.414	601.574	585.701	575.485
ENSMUSG00000022489	1.85235	3.49488e-06	0.000173476	up	15:+:103503034-103530052	15:+:103503034-103530052	ENSMUSG00000022489	18574	Q6PDS5	Pde1b	phosphodiesterase 1B, Ca2+-calmodulin dependent	3.81152	4.61654	4.31684	2.23797	3.05491	2.37126	0.5393	0.8297	0.49053	0.79031
ENSMUSG00000043644	-1.27014629000774	3.47764e-06	0.000173476	down	11:+:120348678-120351190	11:+:120348678-120351190	ENSMUSG00000043644	66838	Q9CVY3,Q9CWA9	0610009L18Rik	RIKEN cDNA 0610009L18 gene [Source:MGI Symbol;Acc:MGI:1914088]	8.28602	6.62548	7.86072	10.1696	10.3023	7.28566	17.0421	15.8916	10.5884	13.7787
ENSMUSG00000095609	2.73463	2.09684e-06	0.000126304	up	13:-:120034605-120052194	13:-:120034605-120052194	ENSMUSG00000095609	100861753	Q3T9V6	Gm21188	predicted gene, 21188	0.77751	1.26247	0.9284	0.98347	0.92111	0.84876	0.04546	0.08275	0.09649	0.21947
ENSMUSG00000026173	-1.97487205108248	2.90171e-06	0.000153891	down	1:+:74542888-74567794	1:+:74542888-74567794	ENSMUSG00000026173	18802	Q8K3R3	Plcd4	phospholipase C, delta 4 [Source:MGI Symbol;Acc:MGI:107469]	2.43641	1.62424	3.27702	4.46769	4.8505	4.30237	11.4922	10.9287	10.7347	8.53682
ENSMUSG00000038204	-1.40686590045626	3.14682e-06	0.00016225	down	5:-:24532697-24540978	5:-:24532697-24540978	ENSMUSG00000038204	117590	Q91ZT7	Asb10	Ankyrin repeat and SOCS box protein 10 [Source:UniProtKB/Swiss-Prot;Acc:Q91ZT7]	5.41127	3.41034	4.68566	5.21934	6.51786	5.8308	12.3525	9.34845	11.3196	8.82811
ENSMUSG00000006369	1.06878	3.01846e-06	0.000157573	up	15:+:85205949-85286535	15:+:85205949-85286535	ENSMUSG00000006369	14114	Q3TWK8	Fbln1	Mus musculus fibulin 1 (Fbln1), transcript variant 2, mRNA. [Source:RefSeq mRNA;Acc:NM_001347088]	13.6723	16.8077	13.8771	10.9116	12.2307	12.7618	5.18707	7.01597	4.44383	4.13493
ENSMUSG00000037321	1.72412	3.52477e-06	0.000174664	up	17:+:34187553-34197225	17:+:34187553-34197225	ENSMUSG00000037321	21354	P21958	Tap1	transporter 1, ATP-binding cassette, sub-family B (MDR/TAP) [Source:MGI Symbol;Acc:MGI:98483]	5.0727	4.42889	3.91347	5.24339	7.25103	4.52001	1.14826	1.6697	0.57543	1.23686
ENSMUSG00000031903	1.57229	3.33734e-06	0.000168703	up	8:+:106150399-106164715	8:+:106150399-106164715	ENSMUSG00000031903	192654	Q8VEB4	Pla2g15	Mus musculus phospholipase A2, group XV (Pla2g15), transcript variant 2, mRNA. [Source:RefSeq mRNA;Acc:NM_001357319]	16.8545	18.2496	10.1363	9.38041	11.9205	12.9316	2.44911	3.78803	2.86557	4.51668
ENSMUSG00000028249	1.09185	2.71731e-06	0.000148468	up	4:+:6365650-6408423	4:+:6365650-6408423	ENSMUSG00000028249	53378	O08992	Sdcbp	syndecan binding protein [Source:MGI Symbol;Acc:MGI:1337026]	33.3427	46.4516	31.745	26.172	27.0919	28.5973	12.7657	17.1891	11.1913	12.4354
ENSMUSG00000054958	-2.35919559679717	2.98076e-06	0.000156328	down	4:+:123201504-123216275	4:+:123201504-123216275	ENSMUSG00000054958	230718	A3KFX0	Nt5c1a	5'-nucleotidase, cytosolic IA [Source:MGI Symbol;Acc:MGI:2155700]	0.4995	0.33201	0.97587	0.94772	1.08488	0.34387	2.34272	2.42925	2.06628	2.05617
ENSMUSG00000079278	-1.39543727386054	2.86177e-06	0.000152659	down	5:-:116038755-116083244	5:-:116038755-116083244	ENSMUSG00000079278	545798	A0A0A0MQE1	Tmem233	transmembrane protein 233 [Source:HGNC Symbol;Acc:HGNC:37219]	22.2443	13.1843	20.0827	24.558	26.474	25.8494	55.6792	44.6007	52.0304	42.8384
ENSMUSG00000046318	2.24006	3.783e-06	0.000183122	up	18:-:66045302-66302739	18:-:66045302-66302739	ENSMUSG00000046318	320924	Q3MI99	Ccbe1	Collagen and calcium-binding EGF domain-containing protein 1 [Source:UniProtKB/Swiss-Prot;Acc:Q3MI99]	3.28371	3.02374	2.38382	1.41152	1.57504	2.24955	0.44803	0.38453	0.21866	0.33628
ENSMUSG00000030341	1.03167	2.90588e-06	0.000153891	up	6:+:125349362-125362484	6:+:125349362-125362484	ENSMUSG00000030341	21937	Q3U479	Tnfrsf1a	tumor necrosis factor receptor superfamily, member 1a [Source:MGI Symbol;Acc:MGI:1314884]	48.5483	68.6294	51.0844	45.517	42.2129	41.9559	18.6524	26.4543	17.3425	20.6462
ENSMUSG00000063632	1.98353	3.57292e-06	0.000176751	up	12:-:27334264-27342574	12:-:27334264-27342574	ENSMUSG00000063632	20666	Q7M6Y2	Sox11	Transcription factor SOX-11 [Source:UniProtKB/Swiss-Prot;Acc:Q7M6Y2]	6.53801	6.26272	3.6498	3.1611	3.42395	5.86801	0.88788	0.91046	0.9782	0.73949
ENSMUSG00000024679	3.52356	3.87626e-06	0.000185655	up	19:-:11586604-11604849	19:-:11586604-11604849	ENSMUSG00000024679	68774	Q99N07	Ms4a6d	membrane-spanning 4-domains, subfamily A, member 6D	28.772	47.6843	23.6293	13.1801	17.0602	16.3213	0.95845	2.1443	0.87177	2.27719
ENSMUSG00000004267	1.37105	3.88767e-06	0.000185655	up	6:-:124760053-124769673	6:-:124760053-124769673	ENSMUSG00000004267	13807	Q545V3	Eno2	Gamma-enolase [Source:UniProtKB/Swiss-Prot;Acc:P17183]	2.07232	2.49661	1.74929	2.15708	2.48063	1.8836	0.47493	0.52268	0.52239	0.77308
ENSMUSG00000030208	1.29384	2.67954e-06	0.000147516	up	6:+:135362545-135383173	6:+:135362545-135383173	ENSMUSG00000030208	13730	Q4FK43	Emp1	Epithelial membrane protein 1 [Source:UniProtKB/Swiss-Prot;Acc:P47801]	88.8932	123.043	95.5121	67.384	64.1453	64.3415	29.3408	38.8117	24.1786	34.8594
ENSMUSG00000000552	-1.27999906345867	3.06752e-06	0.000159565	down	15:-:103313895-103340093	15:-:103313895-103340093	ENSMUSG00000000552	29813	Q8VD12	Zfp385a	zinc finger protein 385A	13.7507	13.1059	18.0916	15.9373	17.1036	15.5547	19.9185	36.5054	38.665	34.2366
ENSMUSG00000031765	2.26749	3.29596e-06	0.000167288	up	8:+:94179082-94180327	8:+:94179082-94180327	ENSMUSG00000031765	17748	P02802	Mt1	Metallothionein-1 [Source:UniProtKB/Swiss-Prot;Acc:P02802]	116.482	187.248	95.4263	69.596	57.168	87.54	14.0133	25.5569	14.3139	12.8849
ENSMUSG00000022504	1.92676	4.03604e-06	0.000189422	up	16:+:10480059-10528418	16:+:10480059-10528418	ENSMUSG00000022504	12265	P79621	Ciita	class II transactivator	1.35278	1.36469	0.85775	1.23282	1.94334	1.27593	0.21255	0.2513	0.18507	0.32228
ENSMUSG00000049173	-1.54626127298093	3.47921e-06	0.000173476	down	18:-:60576316-60591788	18:-:60576316-60591788	ENSMUSG00000049173	170947	E9QJU4	Myoz3	myozenin 3 [Source:HGNC Symbol;Acc:HGNC:18565]	16.1104	11.6395	22.4904	19.4918	24.3412	17.058	49.5766	35.4424	47.3024	34.2399
ENSMUSG00000046603	-1.18222591616781	3.28414e-06	0.000167214	down	9:+:122805539-122836334	9:+:122805539-122836334	ENSMUSG00000046603	382117	Q66JZ4	Tcaim	T cell activation inhibitor, mitochondrial [Source:HGNC Symbol;Acc:HGNC:25241]	5.32009	4.70152	6.78978	7.3967	6.44588	6.79901	10.1795	9.94992	13.3273	12.1082
ENSMUSG00000036856	-1.62550100196016	3.74959e-06	0.000182409	down	4:+:137277489-137299726	4:+:137277489-137299726	ENSMUSG00000036856	22417	P22724	Wnt4	wingless-type MMTV integration site family, member 4 [Source:MGI Symbol;Acc:MGI:98957]	1.71939	1.32797	3.22135	2.35863	2.33818	2.30065	5.8855	4.39024	5.12408	4.38125
ENSMUSG00000028874	3.23341	3.77394e-06	0.000182986	up	4:+:132974095-133001910	4:+:132974095-133001910	ENSMUSG00000028874	14191	P14234	Fgr	Tyrosine-protein kinase Fgr [Source:UniProtKB/Swiss-Prot;Acc:P14234]	3.90434	5.76701	5.42695	2.19491	3.53525	2.94575	0.16143	0.55499	0.14683	0.50326
ENSMUSG00000027962	1.18876	3.48454e-06	0.000173476	up	3:-:116109949-116129688	3:-:116109949-116129688	ENSMUSG00000027962	22329	P29533	Vcam1	vascular cell adhesion molecule 1 [Source:MGI Symbol;Acc:MGI:98926]	6.21758	6.17627	4.52276	5.73548	6.65372	4.80058	1.76344	3.01423	1.39969	1.89483
ENSMUSG00000033610	-1.3171069624104	3.89309e-06	0.000185655	down	19:-:34810894-34879455	19:-:34810894-34879455	ENSMUSG00000033610	75735	Q8K4K6	Pank1	pantothenate kinase 1	2.21452	1.81024	3.26678	1.96601	2.49315	2.17316	5.09525	4.91886	3.31154	3.63505
ENSMUSG00000027408	1.26605	3.43649e-06	0.000172626	up	2:-:130390775-130397574	2:-:130390775-130397574	ENSMUSG00000027408	56264	Q3V190	Cpxm1	Probable carboxypeptidase X1 [Source:UniProtKB/Swiss-Prot;Acc:Q9Z100]	37.8991	35.3506	22.0719	29.7401	28.8439	35.8799	10	14.053	7.30761	11.5008
ENSMUSG00000026288	1.48279	3.69337e-06	0.000179974	up	1:+:87620312-87720507	1:+:87620312-87720507	ENSMUSG00000026288	16331	Q9ES52	Inpp5d	Phosphatidylinositol 3,4,5-trisphosphate 5-phosphatase 1 [Source:UniProtKB/Swiss-Prot;Acc:Q9ES52]	8.35689	9.61084	8.03488	4.74872	6.64769	5.35297	1.66794	2.52991	1.54197	2.26863
ENSMUSG00000067212	1.42193	3.8266e-06	0.000184623	up	17:-:36029773-36032855	17:-:36029773-36032855	ENSMUSG00000067212	15040	P06339	H2-T23	H-2 class I histocompatibility antigen, D-37 alpha chain [Source:UniProtKB/Swiss-Prot;Acc:P06339]	14.3788	14.9494	10.7684	15.4305	18.4504	14.7572	4.51486	6.02415	2.35595	4.602
ENSMUSG00000063821	-1.42079993331979	3.62872e-06	0.000177802	down	14:-:21676537-21714576	14:-:21676537-21714576	ENSMUSG00000063821	435391	Q8BK84	Dupd1	dual specificity phosphatase and pro isomerase domain containing 1	15.1285	12.9229	13.1285	23.532	17.535	16.7622	41.966	34.0163	36.7373	25.1458
ENSMUSG00000044951	-1.33224746054448	3.22093e-06	0.000165198	down	13:-:32700834-32783954	13:-:32700834-32783954	ENSMUSG00000044951	238564	F8WIP5	Mylk4	myosin light chain kinase family member 4 [Source:HGNC Symbol;Acc:HGNC:27972]	9.87385	5.17578	11.5995	9.43175	9.35012	8.30689	19.8699	18.3701	17.8352	19.8441
ENSMUSG00000032915	2.74102	3.23645e-06	0.000165704	up	17:+:55749984-55853662	17:+:55749984-55853662	ENSMUSG00000032915	52614	Q91ZE5	Adgre4	adhesion G protein-coupled receptor E4	2.29838	2.13202	1.14174	1.2144	1.8095	1.69742	0.14886	0.32513	0.09026	0.17964
ENSMUSG00000030306	-1.24964997188857	3.24995e-06	0.000166105	down	6:-:148232430-148444389	6:-:148232430-148444389	ENSMUSG00000030306	387314	Q3UV71	Tmtc1	Mus musculus transmembrane and tetratricopeptide repeat containing 1 (Tmtc1), transcript variant 2, mRNA. [Source:RefSeq mRNA;Acc:NM_001347518]	6.81996	5.65461	7.97153	8.86613	8.40214	7.9106	16.1083	12.7246	20.9019	13.5618
ENSMUSG00000039542	1.58985	3.58075e-06	0.000176815	up	9:-:49502136-49798925	9:-:49502136-49798925	ENSMUSG00000039542	17967	P13595	Ncam1	neural cell adhesion molecule 1 isoform 3 [Source:RefSeq peptide;Acc:NP_001106675]	16.1949	11.0041	9.0216	6.88015	8.26319	11.1368	2.95097	2.40904	2.86594	2.66372
ENSMUSG00000030621	-1.47344690354903	3.5863e-06	0.000176815	down	7:+:89632392-89854359	7:+:89632392-89854359	ENSMUSG00000030621	109264	Q8BMF3	Me3	NADP-dependent malic enzyme, mitochondrial [Source:UniProtKB/Swiss-Prot;Acc:Q8BMF3]	1.40986	1.25679	2.27599	1.89313	2.09809	2.11925	4.22862	3.00539	4.31808	4.75151
ENSMUSG00000021091	6.12694	3.46529e-06	0.000173476	up	12:+:104406729-104414329	12:+:104406729-104414329	ENSMUSG00000021091	20716	G3X8T9	Serpina3n	serine (or cysteine) peptidase inhibitor, clade A, member 3N [Source:MGI Symbol;Acc:MGI:105045]	19.7816	48.1051	33.3555	24.7726	20.7243	17.1242	0.15106	0.76377	0.03053	1.1546
ENSMUSG00000002274	-1.58694908723155	4.38292e-06	0.000197778	down	17:-:25794571-25797136	17:-:25794571-25797136	ENSMUSG00000002274	70083	A2RSN4	Metrn	meteorin, glial cell differentiation regulator	1.5936	1.55355	1.58829	1.16464	1.13275	1.20677	3.55136	2.68234	2.63689	2.62398
ENSMUSG00000041528	-1.11290042053763	3.28878e-06	0.000167214	down	9:-:108051534-108083346	9:-:108051534-108083346	ENSMUSG00000041528	84585	Q5XPI3	Rnf123	ring finger protein 123 [Source:MGI Symbol;Acc:MGI:2148796]	10.9475	8.26121	13.1057	12.4494	14.2164	9.98484	20.9972	20.0263	25.0444	19.3599
ENSMUSG00000032508	1.03166	4.10768e-06	0.000191252	up	9:-:119335934-119341411	9:-:119335934-119341411	ENSMUSG00000032508	17874	P22366	Myd88	myeloid differentiation primary response gene 88 [Source:MGI Symbol;Acc:MGI:108005]	11.2566	14.4072	12.539	9.55039	9.15502	9.71032	3.59081	4.87126	3.42509	4.50385
ENSMUSG00000002897	1.35061	4.17944e-06	0.000193363	up	6:+:120463247-120487559	6:+:120463247-120487559	ENSMUSG00000002897	16172	Q60943	Il17ra	Interleukin-17 receptor A [Source:UniProtKB/Swiss-Prot;Acc:Q60943]	3.68177	4.3898	4.20707	2.56582	3.34077	2.70009	0.77991	1.49235	0.77849	1.14392
ENSMUSG00000055138	-2.90830879431373	4.4433e-06	0.000198863	down	3:-:137550045-137552622	3:-:137550045-137552622	ENSMUSG00000055138	229862	Q8C5A4	Gm4861	predicted gene 4861	1.06129	0.42325	3.29946	1.34241	3.08037	0.71235	4.83277	7.90685	8.8902	6.68416
ENSMUSG00000029762	2.17376	4.53545e-06	0.000201401	up	6:+:34354119-34368463	6:+:34354119-34368463	ENSMUSG00000029762	14187	P45377	Akr1b8	Aldose reductase-related protein 2 [Source:UniProtKB/Swiss-Prot;Acc:P45377]	21.2413	30.7371	21.0301	12.427	14.8096	14.3781	2.08002	4.41694	1.76578	4.51836
ENSMUSG00000034116	2.6629	4.67504e-06	0.000205575	up	17:+:57279100-57328031	17:+:57279100-57328031	ENSMUSG00000034116	22324	Q3U9E2	Vav1	vav 1 oncogene [Source:MGI Symbol;Acc:MGI:98923]	8.44083	10.0769	8.12667	4.11045	6.08467	4.16618	0.57771	1.52171	0.37594	0.88424
ENSMUSG00000025351	1.28215	3.27393e-06	0.000167039	up	10:+:128900989-128912822	10:+:128900989-128912822	ENSMUSG00000025351	12512	P41731	Cd63	CD63 antigen	113.702	132.781	101.798	63.2401	66.1418	76.1389	36.0882	37.1116	27.4543	32.4466
ENSMUSG00000037568	1.2219	4.15492e-06	0.000192533	up	1:-:190947646-190979296	1:-:190947646-190979296	ENSMUSG00000037568	226841	Q8C5G2	Vash2	vasohibin 2 [Source:MGI Symbol;Acc:MGI:2444826]	10.8887	8.74378	6.25148	7.92136	7.96297	10.3932	2.77055	3.37649	2.64416	2.544
ENSMUSG00000116138	-1.02667032693188	4.02241e-06	0.000189086	down	15:-:76721465-76723845	15:-:76721465-76723845	ENSMUSG00000116138	223665	Q8VE95	C030006K11Rik	UPF0598 [Source:UniProtKB/Swiss-Prot;Acc:Q8VE95]	8.2967	7.23007	9.21789	7.66174	8.21189	6.2549	14.9285	11.8116	12.4667	10.4039
ENSMUSG00000019810	1.12261	4.14171e-06	0.000192225	up	10:+:13499540-13519035	10:+:13499540-13519035	ENSMUSG00000019810	66848	Q505Q3	Fuca2	Mus musculus fucosidase, alpha-L- 2, plasma (Fuca2), transcript variant 2, mRNA. [Source:RefSeq mRNA;Acc:NM_001330198]	8.07775	6.54161	4.86466	5.2547	5.55623	6.7667	1.97371	2.72248	1.72872	2.35136
ENSMUSG00000035697	1.95658	4.2759e-06	0.000195183	up	10:+:80016653-80031472	10:+:80016653-80031472	ENSMUSG00000035697	70719	Q3TBD2	Arhgap45	Mus musculus Rho GTPase activating protein 45 (Arhgap45), transcript variant 3, mRNA. [Source:RefSeq mRNA;Acc:NM_001347074]	13.6766	14.597	12.4959	7.97552	14.8993	7.61185	1.91478	3.81609	1.19626	2.99701
ENSMUSG00000030329	2.70255	3.48786e-06	0.000173476	up	6:+:124996694-125003096	6:+:124996694-125003096	ENSMUSG00000030329	319352	Q6P1B3	Pianp	PILR alpha-associated neural protein [Source:UniProtKB/Swiss-Prot;Acc:Q6P1B3]	2.67183	2.14887	1.50698	1.50954	1.43493	2.17043	0.12759	0.30965	0.11053	0.30796
ENSMUSG00000052504	1.11316	4.72041e-06	0.000207152	up	16:-:63543538-63864158	16:-:63543538-63864158	ENSMUSG00000052504	13837	Q8BRB1	Epha3	Eph receptor A3	3.54465	2.86308	3.46677	2.45179	2.84914	2.95605	0.94584	1.25914	0.95774	0.87548
ENSMUSG00000114608	2.97565	2.20928e-06	0.000129661	up	13:+:120010390-120018931	13:+:120010390-120018931	ENSMUSG00000114608	102639975	-	Gm36161	predicted gene, 36161 [Source:MGI Symbol;Acc:MGI:5595320]	1.71631	2.0803	1.81808	2.34122	3.10974	2.39784	0.13775	0.37609	0.16706	0.12468
ENSMUSG00000037649	1.56294	4.92839e-06	0.000210615	up	17:+:34135182-34139101	17:+:34135182-34139101	ENSMUSG00000037649	14998	Q31621	H2-DMa	histocompatibility 2, class II, locus DMa [Source:MGI Symbol;Acc:MGI:95921]	10.9549	10.7681	7.98063	6.38039	10.3019	10.0661	1.8367	2.72825	1.42096	3.32483
ENSMUSG00000017692	-1.16430848915111	4.34331e-06	0.000197206	down	11:+:80300912-80355955	11:+:80300912-80355955	ENSMUSG00000017692	246104	P58873	Rhbdl3	Rhomboid-related protein 3 [Source:UniProtKB/Swiss-Prot;Acc:P58873]	2.64962	2.80218	3.44435	3.8671	2.91022	3.09056	5.29099	4.72862	6.5764	4.94128
ENSMUSG00000078942	1.76171	4.82399e-06	0.000207543	up	13:-:100281121-100317674	13:-:100281121-100317674	ENSMUSG00000078942	17952	Q9JIB6	Naip6	NLR family, apoptosis inhibitory protein 6 [Source:MGI Symbol;Acc:MGI:1298222]	1.21991	1.00863	1.18282	0.77153	1.2866	1.09842	0.14462	0.36022	0.19386	0.22965
ENSMUSG00000000682	2.97553	5.00899e-06	0.000211985	up	4:-:134082448-134095082	4:-:134082448-134095082	ENSMUSG00000000682	23833	Q3U1T8	Cd52	CAMPATH-1 antigen [Source:UniProtKB/Swiss-Prot;Acc:Q64389]	23.7014	36.8115	24.421	14.3946	22.5542	13.3861	1.8825	4.94045	0.7964	1.95483
ENSMUSG00000059182	1.01231	4.31631e-06	0.000196285	up	6:-:51857422-52012549	6:-:51857422-52012549	ENSMUSG00000059182	54353	Q3UND0	Skap2	Src kinase-associated phosphoprotein 2 [Source:UniProtKB/Swiss-Prot;Acc:Q3UND0]	3.57272	4.93968	3.49133	3.07118	3.10952	3.01978	1.21713	1.57684	1.20416	1.43571
ENSMUSG00000079419	2.45681	5.0648e-06	0.000213421	up	19:+:11469366-11482192	19:+:11469366-11482192	ENSMUSG00000079419	73656	Q99N08	Ms4a6c	Membrane-spanning 4-domains subfamily A member 6C [Source:UniProtKB/Swiss-Prot;Acc:Q99N08]	12.9558	14.2016	8.45894	5.70277	9.03891	6.21604	1.01397	1.93785	0.64559	1.40722
ENSMUSG00000053063	3.60005	4.82261e-06	0.000207543	up	6:+:129342691-129365303	6:+:129342691-129365303	ENSMUSG00000053063	232413	A0A0R4J0T2	Clec12a	C-type lectin domain family 12, member a	4.17064	5.03753	3.53956	2.19615	3.50435	2.87432	0.0752	0.96958	0.0798	0.31765
ENSMUSG00000059456	1.93059	4.99715e-06	0.000211789	up	14:-:66153257-66281052	14:-:66153257-66281052	ENSMUSG00000059456	19229	Q3UDE9	Ptk2b	PTK2 protein tyrosine kinase 2 beta [Source:MGI Symbol;Acc:MGI:104908]	2.94482	3.25773	3.15564	2.10989	3.37484	1.90677	0.38634	0.95464	0.25556	0.72055
ENSMUSG00000098557	1.25731	4.05929e-06	0.000189905	up	14:-:102976581-102982637	14:-:102976581-102982637	ENSMUSG00000098557	239217	A0A0R4J2B2	Kctd12	potassium channel tetramerization domain containing 12 [Source:HGNC Symbol;Acc:HGNC:14678]	16.1646	17.2785	12.0244	9.63995	11.0152	11.7745	4.03235	5.7883	4.06826	3.64455
ENSMUSG00000018008	2.45457	4.50337e-06	0.000200739	up	15:+:78597047-78622019	15:+:78597047-78622019	ENSMUSG00000018008	72318	Q80YW0	Cyth4	cytohesin 4	13.2471	15.6414	10.9395	5.57119	8.60361	5.65922	1.04592	1.87869	0.87623	1.71066
ENSMUSG00000052688	1.18998	4.41588e-06	0.000198349	up	1:+:131688695-131715439	1:+:131688695-131715439	ENSMUSG00000052688	226421	Q8VEA8	Rab7b	RAB7B, member RAS oncogene family [Source:MGI Symbol;Acc:MGI:2442295]	9.41192	13.0521	9.58255	7.29306	7.74138	7.2014	2.641	3.32741	2.6577	3.58051
ENSMUSG00000026589	1.06686	4.65621e-06	0.000205055	up	1:+:157506728-157568425	1:+:157506728-157568425	ENSMUSG00000026589	89867	Q91XT4	Sec16b	Protein transport protein Sec16B [Source:UniProtKB/Swiss-Prot;Acc:Q91XT4]	5.4819	5.66215	4.93716	4.3575	4.15904	4.56546	1.26793	2.37775	1.38624	2.16772
ENSMUSG00000039652	-1.29574144101142	4.27876e-06	0.000195183	down	19:-:37021291-37208601	19:-:37021291-37208601	ENSMUSG00000039652	208922	A0A0R4J102	Cpeb3	Cytoplasmic polyadenylation element-binding protein 3 [Source:UniProtKB/Swiss-Prot;Acc:Q7TN99]	2.38365	2.02145	2.24118	3.30963	3.51362	3.04142	4.60501	4.90746	6.19676	5.14292
ENSMUSG00000029771	2.02104	4.97319e-06	0.000211386	up	6:+:29526625-29541871	6:+:29526625-29541871	ENSMUSG00000029771	27056	P56477	Irf5	Interferon regulatory factor 5 [Source:UniProtKB/Swiss-Prot;Acc:P56477]	11.3453	14.8845	11.2259	5.70482	8.40812	6.49857	1.43107	2.21405	1.30165	1.77022
ENSMUSG00000022534	5.18618	1.25677e-06	0.000100838	up	16:-:3707218-3718097	16:-:3707218-3718097	ENSMUSG00000022534	54483	Q9JJ26	Mefv	Mediterranean fever	1.26527	2.32056	1.56039	0.75082	1.12884	1.04847	0.01598	0.05819	0	0.01929
ENSMUSG00000025492	1.20944	3.94752e-06	0.000187674	up	7:-:141009586-141010770	7:-:141009586-141010770	ENSMUSG00000025492	66141	Q9CQW9	Ifitm3	Interferon-induced transmembrane protein 3 [Source:UniProtKB/Swiss-Prot;Acc:Q9CQW9]	171.073	246.736	203.543	140.785	159.721	151.828	67.2184	83.7971	44.4312	67.153
ENSMUSG00000006731	2.28352	5.21754e-06	0.000217047	up	10:+:127165225-127172330	10:+:127165225-127172330	ENSMUSG00000006731	14421	Q3UN35	B4galnt1	beta-1,4-N-acetyl-galactosaminyl transferase 1	5.85162	6.93365	5.39517	3.57065	4.92928	2.91501	0.88766	1.11363	0.49264	0.45392
ENSMUSG00000015950	2.28791	4.94465e-06	0.000210784	up	5:-:134220053-134229625	5:-:134220053-134229625	ENSMUSG00000015950	17969	Q3UBI5	Ncf1	Neutrophil cytosol factor 1 [Source:UniProtKB/Swiss-Prot;Acc:Q09014]	12.5328	15.7714	13.3401	6.34805	8.67194	7.64479	1.04982	3.21913	1.01509	1.67783
ENSMUSG00000071347	-1.1305330569349	4.27427e-06	0.000195183	down	14:+:60768134-60780869	14:+:60768134-60780869	ENSMUSG00000071347	239126	Q4ZJN1	C1qtnf9	Complement C1q and tumor necrosis factor-related protein 9 [Source:UniProtKB/Swiss-Prot;Acc:Q4ZJN1]	14.6504	14.5802	14.7974	16.8772	11.7288	12.4004	29.7377	31.3132	16.3598	24.09
ENSMUSG00000049313	-1.00276112141232	4.00131e-06	0.000189004	down	9:-:41964720-42124297	9:-:41964720-42124297	ENSMUSG00000049313	20660	O88307	Sorl1	Sortilin-related receptor [Source:UniProtKB/Swiss-Prot;Acc:O88307]	4.9567	3.74338	5.61029	4.2441	5.52141	3.5806	8.4965	7.88701	7.02529	7.38421
ENSMUSG00000040528	2.90577	4.2744e-06	0.000195183	up	11:+:106751226-106768794	11:+:106751226-106768794	ENSMUSG00000040528	380732	Q3TB92	Milr1	Allergin-1 [Source:UniProtKB/Swiss-Prot;Acc:Q3TB92]	3.92057	4.25683	3.45231	1.66168	2.84515	2.28921	0.31507	0.33134	0.22926	0.20279
ENSMUSG00000060090	1.03464	4.79139e-06	0.000207543	up	X:+:20364481-20405653	X:+:20364481-20405653	ENSMUSG00000060090	19889	Q9EPK2	Rp2	Protein XRP2 [Source:UniProtKB/Swiss-Prot;Acc:Q9EPK2]	5.44276	6.72661	5.54791	4.42307	5.34795	5.49797	1.51622	2.79654	1.66717	2.31774
ENSMUSG00000003363	1.34282	4.10514e-06	0.000191252	up	7:-:27532000-27553218	7:-:27532000-27553218	ENSMUSG00000003363	18807	O35405	Pld3	Phospholipase D3 [Source:UniProtKB/Swiss-Prot;Acc:O35405]	53.4746	54.7529	36.1142	28.5584	32.3646	36.6935	12.7071	16.2818	11.0352	12.0322
ENSMUSG00000015968	1.9883	5.40969e-06	0.000222512	up	14:-:30039939-30491455	14:-:30039939-30491455	ENSMUSG00000015968	12289	Q99246	Cacna1d	calcium channel, voltage-dependent, L type, alpha 1D subunit	1.17491	1.21956	1.14839	0.64128	1.02009	1.2174	0.16881	0.12491	0.18476	0.29317
ENSMUSG00000050503	-1.10624353072746	4.23434e-06	0.000194979	down	9:-:66508459-66514593	9:-:66508459-66514593	ENSMUSG00000050503	74165	Q8C7B6	Fbxl22	F-box and leucine-rich repeat protein 22	10.2081	8.1963	7.81388	6.72544	10.5646	9.72835	18.1583	14.8068	17.0086	12.5267
ENSMUSG00000000305	-2.16830969366273	5.43323e-06	0.000223018	down	2:+:179442431-179899373	2:+:179442431-179899373	ENSMUSG00000000305	12561	Q80ZV4	Cdh4	Cadherin-4 [Source:UniProtKB/Swiss-Prot;Acc:P39038]	0.18894	0.27908	0.40658	0.51338	0.38135	0.39744	0.9309	0.86891	1.84106	1.02837
ENSMUSG00000030745	2.68737	4.59786e-06	0.000203096	up	7:+:125603429-125633570	7:+:125603429-125633570	ENSMUSG00000030745	60504	Q9JHX3	Il21r	Interleukin-21 receptor [Source:UniProtKB/Swiss-Prot;Acc:Q9JHX3]	2.04719	2.89411	1.85315	1.6619	3.05876	1.56184	0.20324	0.36043	0.28439	0.1132
ENSMUSG00000074466	-1.29493402958226	5.14011e-06	0.000215606	down	3:+:89391850-89398779	3:+:89391850-89398779	ENSMUSG00000074466	545539	Q3UW30	Gm15417	predicted gene 15417	4.47277	6.219	6.69919	3.88717	4.28953	5.81268	11.6448	8.61415	7.55202	9.95745
ENSMUSG00000001750	1.51866	4.47139e-06	0.000199618	up	19:-:3896050-3907133	19:-:3896050-3907133	ENSMUSG00000001750	27060	Q9JHF5	Tcirg1	T cell, immune regulator 1, ATPase, H+ transporting, lysosomal V0 protein A3 [Source:MGI Symbol;Acc:MGI:1350931]	23.0283	26.5165	22.5815	13.7953	15.0067	13.5968	4.60369	7.06747	4.6526	4.92445
ENSMUSG00000036894	1.16157	5.37513e-06	0.000221401	up	3:+:61361638-61368430	3:+:61361638-61368430	ENSMUSG00000036894	74012	Q6ZWR0	Rap2b	RAP2B, member of RAS oncogene family [Source:MGI Symbol;Acc:MGI:1921262]	2.84078	3.86092	2.81184	2.48692	2.50636	2.4317	1.03274	0.78903	0.78858	1.02475
ENSMUSG00000032968	-1.02238890343999	5.11359e-06	0.000214859	down	1:+:75507077-75510366	1:+:75507077-75510366	ENSMUSG00000032968	16322	Q04997	Inha	Inhibin alpha chain [Source:UniProtKB/Swiss-Prot;Acc:Q04997]	9.15809	7.27724	9.29992	8.05653	7.95356	7.53711	12.3309	17.3995	9.14348	12.5426
ENSMUSG00000084883	-1.1540523882908	5.64084e-06	0.000229338	down	12:-:108203602-108275425	12:-:108203602-108275425	ENSMUSG00000084883	668158	E9Q6B2	Ccdc85c	coiled-coil domain containing 85C	1.44023	1.49432	1.63515	1.73287	1.74783	1.2454	2.67198	2.96602	2.51389	1.8798
ENSMUSG00000058624	1.28865	4.93348e-06	0.000210615	up	19:-:21391307-21473445	19:-:21391307-21473445	ENSMUSG00000058624	14544	Q9R111	Gda	Guanine deaminase [Source:UniProtKB/Swiss-Prot;Acc:Q9R111]	6.79585	11.3643	7.83838	8.51225	8.06077	7.67579	1.82961	4.05991	2.41403	2.83155
ENSMUSG00000021294	-1.0761921214962	4.78069e-06	0.000207543	down	12:+:112146208-112181747	12:+:112146208-112181747	ENSMUSG00000021294	668303	Q52KG5	Kif26a	Kinesin-like protein KIF26A [Source:UniProtKB/Swiss-Prot;Acc:Q52KG5]	3.00967	3.16174	4.39969	4.57757	3.19157	3.89622	5.80654	7.64743	5.47499	5.838
ENSMUSG00000048520	2.0093	4.82104e-06	0.000207543	up	5:-:21483847-21645634	5:-:21483847-21645634	ENSMUSG00000048520	320118	B7ZNK2	Fbxl13	F-box/LRR-repeat protein 13 [Source:UniProtKB/Swiss-Prot;Acc:Q8CDU4]	0.84965	1.01468	0.81847	0.73222	0.87383	0.56885	0.09554	0.12753	0.10428	0.24214
ENSMUSG00000036353	1.24061	5.95347e-06	0.000235613	up	3:-:59216272-59262871	3:-:59216272-59262871	ENSMUSG00000036353	70839	Q8BZV8	P2ry12	purinergic receptor P2Y, G-protein coupled 12 [Source:MGI Symbol;Acc:MGI:1918089]	4.46792	5.21034	3.53766	3.55737	3.85166	3.27491	0.95931	1.46126	1.11389	1.13307
ENSMUSG00000020475	-1.0697956589668	3.66888e-06	0.000179377	down	11:-:5801640-5803733	11:-:5801640-5803733	ENSMUSG00000020475	56012	Q5NCI4	Pgam2	phosphoglycerate mutase 2 [Source:MGI Symbol;Acc:MGI:1933118]	636.415	528.861	818.298	787.714	838.394	738.777	1514.81	1498.96	1557.16	1173.63
ENSMUSG00000020399	4.42895	2.06178e-06	0.000125273	up	11:+:46454935-46481255	11:+:46454935-46481255	ENSMUSG00000020399	171285	Q8VIM0	Havcr2	Hepatitis A virus cellular receptor 2 homolog [Source:UniProtKB/Swiss-Prot;Acc:Q8VIM0]	2.51954	3.01446	2.53016	1.48724	2.03413	1.50324	0.05729	0.27809	0.02316	0.02305
ENSMUSG00000058715	2.56999	5.59619e-06	0.000228259	up	1:-:171229572-171234365	1:-:171229572-171234365	ENSMUSG00000058715	14127	P20491	Fcer1g	High affinity immunoglobulin epsilon receptor subunit gamma [Source:UniProtKB/Swiss-Prot;Acc:P20491]	96.2779	140.715	79.7777	42.2595	58.4407	51.4198	6.48087	14.5738	6.20121	13.131
ENSMUSG00000021676	1.24577	5.50603e-06	0.000225209	up	13:-:95627177-95891922	13:-:95627177-95891922	ENSMUSG00000021676	544963	Q3UQ44	Iqgap2	IQ motif containing GTPase activating protein 2	7.0925	8.27339	6.52091	4.71936	6.05681	5.24307	1.40473	2.53496	1.73634	2.695
ENSMUSG00000037904	-1.47324566256905	4.72838e-06	0.000207152	down	12:-:110975353-110979040	12:-:110975353-110979040	ENSMUSG00000037904	74251	Q8BH83	Ankrd9	Ankyrin repeat domain-containing protein 9 [Source:UniProtKB/Swiss-Prot;Acc:Q8BH83]	20.8113	11.28	8.5836	14.4324	13.86	13.6742	34.0409	41.1068	27.6617	23.7953
ENSMUSG00000102098	-2.53329548287052	4.36972e-06	0.000197778	down	12:-:30410559-30467358	12:-:30410559-30467358	ENSMUSG00000102098	69566	-	2310016D03Rik	RIKEN cDNA 2310016D03 gene	0.19696	0.19637	0.33461	0.49826	0.58334	0.16949	1.24288	1.875	0.73328	1.37831
ENSMUSG00000097666	-1.59710644933548	6.35071e-06	0.000246959	down	18:-:77729681-77733470	18:-:77729681-77733470	ENSMUSG00000097666	77093	-	A330094K24Rik	RIKEN cDNA A330094K24 gene [Source:MGI Symbol;Acc:MGI:1924343]	3.06575	2.11993	2.67135	2.75201	2.16746	3.26791	7.08396	4.48215	5.82965	5.3126
ENSMUSG00000079434	-1.36133787584065	5.66181e-06	0.000229338	down	1:+:87509889-87597845	1:+:87509889-87597845	ENSMUSG00000079434	23956	Q0VGI4	Neu2	Sialidase-2 [Source:UniProtKB/Swiss-Prot;Acc:Q9JMH3]	3.64694	3.03009	3.81732	5.0346	5.01733	4.59608	9.34984	6.25702	8.12711	8.25683
ENSMUSG00000042485	2.19372	4.75877e-06	0.000207389	up	14:+:30879200-30881610	14:+:30879200-30881610	ENSMUSG00000042485	66175	Q99JI1	Mustn1	musculoskeletal, embryonic nuclear protein 1	227.084	232.308	184.733	98.6904	99.8312	182.097	46.8786	24.9473	17.1831	38.5615
ENSMUSG00000027386	1.89416	5.44692e-06	0.000223103	up	2:+:128862981-128897034	2:+:128862981-128897034	ENSMUSG00000027386	70370	Q501P1	Fbln7	Fibulin-7 [Source:UniProtKB/Swiss-Prot;Acc:Q501P1]	27.169	21.3318	11.626	22.9835	17.2955	20.7615	6.16572	5.3329	2.499	3.30274
ENSMUSG00000031842	-1.45146708911237	6.30361e-06	0.000246472	down	8:+:70723720-70751186	8:+:70723720-70751186	ENSMUSG00000031842	110385	Q3UEI1	Pde4c	cAMP-specific 3',5'-cyclic phosphodiesterase 4C [Source:UniProtKB/Swiss-Prot;Acc:Q3UEI1]	0.85364	0.5342	0.87939	1.34396	0.67779	0.97528	1.55191	1.99591	1.49891	1.55886
ENSMUSG00000044206	4.24871	1.79166e-06	0.000118578	up	X:-:96247203-96293438	X:-:96247203-96293438	ENSMUSG00000044206	278180	F6TUL9	Vsig4	V-set and immunoglobulin domain containing 4	0.95816	0.58001	0.48834	0.25971	1.0135	0.42404	0.03502	0	0	0
ENSMUSG00000030732	-2.76113862824778	5.59268e-06	0.000228259	down	7:+:100006172-100034728	7:+:100006172-100034728	ENSMUSG00000030732	69121	Q8VEA6	Chrdl2	chordin like 2 [Source:HGNC Symbol;Acc:HGNC:24168]	0.23588	0.09684	0.07072	0.59671	0.31231	0.18626	0.73831	1.30938	1.01592	0.80533
ENSMUSG00000049551	-1.16136069479287	5.85335e-06	0.000233797	down	5:-:135248938-135251230	5:-:135248938-135251230	ENSMUSG00000049551	14371	Q9R216	Fzd9	Frizzled-9 [Source:UniProtKB/Swiss-Prot;Acc:Q9R216]	6.35614	3.57712	5.35019	5.51862	4.43406	5.96895	9.13312	9.54244	7.88801	8.04085
ENSMUSG00000024663	1.18802	5.30749e-06	0.000219633	up	19:+:10001669-10038380	19:+:10001669-10038380	ENSMUSG00000024663	74760	Q8VDV3	Rab3il1	Mus musculus RAB3A interacting protein (rabin3)-like 1 (Rab3il1), transcript variant 2, mRNA. [Source:RefSeq mRNA;Acc:NM_001347429]	15.0794	19.8158	16.1569	10.7034	11.3358	12.6396	4.78136	5.78798	3.93972	5.45272
ENSMUSG00000071042	-1.23649304458806	5.08727e-06	0.00021406	down	17:+:75435905-75529043	17:+:75435905-75529043	ENSMUSG00000071042	240168	Q6NZH9	Rasgrp3	RAS, guanyl releasing protein 3	5.9544	5.40168	7.21599	9.47658	9.80483	8.39719	13.6752	14.6975	15.7394	14.0056
ENSMUSG00000015027	1.51911	6.35822e-06	0.000246959	up	8:-:122578242-122611463	8:-:122578242-122611463	ENSMUSG00000015027	50917	Q571E4	Galns	N-acetylgalactosamine-6-sulfatase [Source:UniProtKB/Swiss-Prot;Acc:Q571E4]	10.9231	11.6549	10.1183	5.59931	7.15128	7.28221	1.96098	2.90301	1.80741	2.15355
ENSMUSG00000092569	-1.78950402547474	5.85971e-06	0.000233797	down	18:-:75365332-75367088	18:-:75365332-75367088	ENSMUSG00000092569	102636262	-	Gm20544	predicted gene 20544 [Source:MGI Symbol;Acc:MGI:5142009]	1.32476	2.128	1.27534	1.30331	0.9591	1.368	3.46439	3.47271	2.83141	3.54466
ENSMUSG00000042359	-1.6031733441824	5.78319e-06	0.000232009	down	2:+:76406508-76600647	2:+:76406508-76600647	ENSMUSG00000042359	99031	Q8BXR9	Osbpl6	Oxysterol-binding protein-related protein 6 [Source:UniProtKB/Swiss-Prot;Acc:Q8BXR9]	1.29694	0.85535	1.18311	1.97242	1.74572	1.56856	2.61301	3.38377	4.41521	2.86674
ENSMUSG00000025537	-1.63652325377053	4.57935e-06	0.000202584	down	5:-:129863421-129898549	5:-:129863421-129898549	ENSMUSG00000025537	18682	P07934	Phkg1	Phosphorylase b kinase gamma catalytic chain, skeletal muscle/heart isoform [Source:UniProtKB/Swiss-Prot;Acc:P07934]	15.3932	10.4391	18.6728	26.734	26.8134	23.7586	54.6484	52.3231	60.359	51.0935
ENSMUSG00000054477	-2.27140895932886	6.85642e-06	0.000261796	down	18:+:45268860-45686024	18:+:45268860-45686024	ENSMUSG00000054477	140492	B4YDY0	Kcnn2	potassium intermediate/small conductance calcium-activated channel, subfamily N, member 2 [Source:MGI Symbol;Acc:MGI:2153182]	0.19422	0.15907	0.55858	0.15793	0.33692	0.20056	0.57495	0.73212	0.86083	1.31919
ENSMUSG00000070780	1.63258	6.93749e-06	0.000263239	up	5:-:66016549-66173118	5:-:66016549-66173118	ENSMUSG00000070780	245945	Q91WT8	Rbm47	RNA-binding protein 47 [Source:UniProtKB/Swiss-Prot;Acc:Q91WT8]	1.21941	1.7742	1.48867	1.11198	1.34383	1.05421	0.19588	0.48417	0.20236	0.38523
ENSMUSG00000029204	2.07564	6.27599e-06	0.00024572	up	5:+:65861213-65896700	5:+:65861213-65896700	ENSMUSG00000029204	74734	Q9D3G9	Rhoh	ras homolog family member H [Source:MGI Symbol;Acc:MGI:1921984]	0.56474	0.58755	0.6157	0.46587	0.65159	0.47161	0.0603	0.15854	0.04266	0.16374
ENSMUSG00000032334	1.20123	4.83962e-06	0.00020782	up	9:-:58287738-58313186	9:-:58287738-58313186	ENSMUSG00000032334	16949	P97873	Loxl1	lysyl oxidase like 1 [Source:HGNC Symbol;Acc:HGNC:6665]	99.2395	105.809	83.1171	57.9611	59.6689	68.4087	25.5968	40.2403	25.5565	30.5672
ENSMUSG00000097867	-1.10389271282023	7.00738e-06	0.000263946	down	16:-:24391612-24393588	16:-:24391612-24393588	ENSMUSG00000097867	68841	-	Lppos	LIM domain containing preferred translocation partner in lipoma, opposite strand [Source:MGI Symbol;Acc:MGI:1916091]	2.24926	2.59002	2.48647	2.16386	2.55208	2.28995	4.11707	3.50099	2.98793	3.6775
ENSMUSG00000048546	-1.11873659142052	5.15395e-06	0.000215606	down	15:-:81848272-81858796	15:-:81848272-81858796	ENSMUSG00000048546	57259	Q9JM55	Tob2	transducer of ERBB2, 2	8.93878	7.66618	5.60048	9.55228	9.93063	9.60819	12.7809	17.581	17.2402	14.9254
ENSMUSG00000019122	2.40727	6.0919e-06	0.000240118	up	11:-:83572919-83578636	11:-:83572919-83578636	ENSMUSG00000019122	20308	Q3U9T8	Ccl9	C-C motif chemokine 9 CCL9(29-101) CCL9(30-101) CCL9(31-101) [Source:UniProtKB/Swiss-Prot;Acc:P51670]	23.1482	46.8905	30.2592	17.4456	17.2088	17.8588	2.38924	7.43432	2.29734	3.64539
ENSMUSG00000030148	2.29336	7.08471e-06	0.000265663	up	6:+:123106428-123143999	6:+:123106428-123143999	ENSMUSG00000030148	26888	Q9QZ15	Clec4a2	C-type lectin domain family 4 member A [Source:UniProtKB/Swiss-Prot;Acc:Q9QZ15]	7.39351	10.5555	6.77563	4.63209	4.93465	4.62388	0.55056	1.96111	0.58154	1.09309
ENSMUSG00000021265	-1.2533403178406	7.11472e-06	0.000266447	down	12:-:108825873-108835883	12:-:108825873-108835883	ENSMUSG00000021265	214663	Q8BL03	Slc25a29	solute carrier family 25 (mitochondrial carrier, palmitoylcarnitine transporter), member 29 [Source:MGI Symbol;Acc:MGI:2444911]	1.22767	1.02973	1.25139	1.03525	1.4544	1.3281	2.05391	2.54067	1.91048	1.63641
ENSMUSG00000015342	-1.13149401031336	7.17581e-06	0.000267845	down	X:+:9272756-9313250	X:+:9272756-9313250	ENSMUSG00000015342	22439	Q059K7	Xk	X-linked Kx blood group [Source:MGI Symbol;Acc:MGI:103569]	0.78035	0.79798	0.99938	0.79724	0.94817	1.03309	1.20803	1.56525	1.08016	1.71732
ENSMUSG00000024180	1.92177	7.27255e-06	0.000270627	up	17:+:26113316-26123254	17:+:26113316-26123254	ENSMUSG00000024180	60455	Q9ESN3	Tmem8	Post-GPI attachment to proteins factor 6 [Source:UniProtKB/Swiss-Prot;Acc:Q9ESN3]	4.42736	5.91971	3.34731	2.52191	3.75141	2.80063	0.64507	1.09221	0.47303	0.63365
ENSMUSG00000067276	1.10761	5.02561e-06	0.000212381	up	X:-:143802231-143827414	X:-:143802231-143827414	ENSMUSG00000067276	12338	Q80VZ1	Capn6	Calpain-6 [Source:UniProtKB/Swiss-Prot;Acc:O35646]	40.4698	30.0738	24.743	26.7321	27.3525	37.9222	13.4665	16.0332	10.8014	11.2473
ENSMUSG00000002111	2.47209	6.97012e-06	0.000263521	up	2:+:91082390-91115756	2:+:91082390-91115756	ENSMUSG00000002111	20375	Q3U5L4	Spi1	spleen focus forming virus (SFFV) proviral integration oncogene [Source:MGI Symbol;Acc:MGI:98282]	18.2968	23.6344	18.3814	9.41471	12.0323	9.35939	1.50402	4.42219	1.35631	1.46602
ENSMUSG00000008226	-1.00664906146803	5.92408e-06	0.000235085	down	2:+:73312601-73337818	2:+:73312601-73337818	ENSMUSG00000008226	74616	Q3TMH2	Scrn3	secernin 3 [Source:MGI Symbol;Acc:MGI:1921866]	4.96752	4.58472	4.3432	6.51016	5.59759	6.05536	9.24917	7.68733	8.66466	8.20546
ENSMUSG00000058620	-1.73947991981922	7.29761e-06	0.000270872	down	2:+:127363208-127367221	2:+:127363208-127367221	ENSMUSG00000058620	11552	F8VQ23	Adra2b	adrenoceptor alpha 2B [Source:HGNC Symbol;Acc:HGNC:282]	0.50606	0.40364	0.28371	0.44807	0.40467	0.24822	0.82855	0.97398	1.03623	0.68744
ENSMUSG00000017817	-1.0317755322625	4.73212e-06	0.000207152	down	2:-:163336242-163397993	2:-:163336242-163397993	ENSMUSG00000017817	59091	Q9ET78	Jph2	Junctophilin-2 [Source:UniProtKB/Swiss-Prot;Acc:Q9ET78]	79.7962	57.8309	88.3207	81.6556	90.0939	75.0672	170.871	126.885	163.308	135.802
ENSMUSG00000027995	1.28223	7.50497e-06	0.000275082	up	3:-:83836272-83841767	3:-:83836272-83841767	ENSMUSG00000027995	24088	Q9QUN7	Tlr2	toll-like receptor 2 [Source:MGI Symbol;Acc:MGI:1346060]	4.04374	5.22444	3.22879	3.75092	4.03206	4.34969	0.96552	1.50634	0.81548	1.53974
ENSMUSG00000030774	-1.00201133177789	5.355e-06	0.000220882	down	7:+:97788541-97912381	7:+:97788541-97912381	ENSMUSG00000030774	18479	G5E884	Pak1	Mus musculus p21 protein (Cdc42/Rac)-activated kinase 1 (Pak1), transcript variant 3, mRNA. [Source:RefSeq mRNA;Acc:NM_001357363]	18.3529	17.7205	21.6874	20.2983	23.3292	24.9099	44.5723	31.0088	41.748	32.2075
ENSMUSG00000021898	-1.74275390983897	6.32779e-06	0.000246758	down	14:+:26894557-26915258	14:+:26894557-26915258	ENSMUSG00000021898	142687	Q8C6Y6	Asb14	ankyrin repeat and SOCS box containing 14 [Source:HGNC Symbol;Acc:HGNC:19766]	5.00057	3.37677	6.19377	7.58517	7.81227	9.23714	14.9435	13.0864	17.9002	20.3467
ENSMUSG00000024087	2.33426	7.75675e-06	0.000280796	up	17:-:79706953-79715041	17:-:79706953-79715041	ENSMUSG00000024087	13078	Q64429	Cyp1b1	cytochrome P450, family 1, subfamily b, polypeptide 1	3.72353	5.46009	2.26113	4.47186	3.95368	2.70994	0.36482	1.04521	0.28266	0.61148
ENSMUSG00000060923	-1.07186164305963	6.38109e-06	0.000247519	down	11:-:30505991-30649587	11:-:30505991-30649587	ENSMUSG00000060923	75572	P56375	Acyp2	Acylphosphatase-2 [Source:UniProtKB/Swiss-Prot;Acc:P56375]	23.067	24.3478	23.6325	22.3295	21.541	23.0905	54.8562	39.3102	30.1598	30.9569
ENSMUSG00000030830	2.33887	7.75225e-06	0.000280796	up	7:+:127296260-127335138	7:+:127296260-127335138	ENSMUSG00000030830	16408	E9Q5M7	Itgal	Integrin alpha-L [Source:UniProtKB/Swiss-Prot;Acc:P24063]	4.25186	3.27576	3.2308	2.60106	5.03712	2.84192	0.47465	1.1615	0.17269	0.57281
ENSMUSG00000087080	-3.54329179398642	6.76211e-06	0.000258974	down	11:-:50717670-50718915	11:-:50717670-50718915	ENSMUSG00000087080	-	-	Gm12199	predicted gene 12199 [Source:MGI Symbol;Acc:MGI:3650414]	0.98226	1.37107	0.50062	1.61518	1.16367	1.42003	22.6157	7.68394	5.36354	7.64203
ENSMUSG00000021242	1.16033	5.68753e-06	0.000230062	up	12:-:84754562-84773152	12:-:84754562-84773152	ENSMUSG00000021242	67963	Q9Z0J0	Npc2	NPC intracellular cholesterol transporter 2	38.1477	43.1925	28.1949	23.4826	27.7464	28.6886	11.1901	16.5238	9.24812	11.8438
ENSMUSG00000030411	-1.26522997147953	7.64844e-06	0.000277561	down	7:+:18925888-18965319	7:+:18925888-18965319	ENSMUSG00000030411	384569	G3UYX3	Nova2	NOVA alternative splicing regulator 2 [Source:HGNC Symbol;Acc:HGNC:7887]	0.6915	0.50196	0.74195	0.82096	0.76172	0.99593	1.06762	1.37834	1.34745	1.36333
ENSMUSG00000074342	1.90198	7.64703e-06	0.000277561	up	3:-:105924358-105932664	3:-:105924358-105932664	ENSMUSG00000074342	433638	Q3U7U4	I830077J02Rik	RIKEN cDNA I830077J02 gene [Source:MGI Symbol;Acc:MGI:3588284]	2.72968	2.49182	2.05971	1.61427	2.83484	1.75715	0.45345	0.59426	0.35195	0.28456
ENSMUSG00000052821	1.63935	8.25748e-06	0.00029136	up	X:-:106574346-106603679	X:-:106574346-106603679	ENSMUSG00000052821	58861	Q99JA4	Cysltr1	Cysteinyl leukotriene receptor 1 [Source:UniProtKB/Swiss-Prot;Acc:Q99JA4]	1.84682	3.29865	2.17444	1.59899	2.17621	1.59094	0.38403	0.58863	0.3922	0.48785
ENSMUSG00000030165	4.75103	2.89791e-06	0.000153891	up	6:+:129591782-129598775	6:+:129591782-129598775	ENSMUSG00000030165	16643	O54707	Klrd1	Natural killer cells antigen CD94 [Source:UniProtKB/Swiss-Prot;Acc:O54707]	0.35679	1.10671	0.76777	1.40403	2.39519	0.7778	0.04057	0	0	0
ENSMUSG00000021306	1.09857	7.4561e-06	0.000273976	up	13:-:13357620-13394014	13:-:13357620-13394014	ENSMUSG00000021306	83924	A0A0R4J022	Gpr137b	G protein-coupled receptor 137B	5.40563	5.8832	4.79942	5.35501	5.26683	4.00654	1.18903	2.39632	1.54231	2.27095
ENSMUSG00000114554	-2.74027008462073	5.71369e-06	0.000230484	down	13:+:80940411-80948597	13:+:80940411-80948597	ENSMUSG00000114554	71416	-	5430425K12Rik	RIKEN cDNA 5430425K12 gene [Source:MGI Symbol;Acc:MGI:1918666]	0.13311	0.09954	0.44098	0.58931	0.31539	0.24055	1.05566	1.40494	0.86727	1.93153
ENSMUSG00000051067	-1.38610696003554	6.94814e-06	0.000263239	down	10:-:80832801-80844039	10:-:80832801-80844039	ENSMUSG00000051067	237403	Q6GQU6	Lingo3	leucine rich repeat and Ig domain containing 3	4.83712	3.5566	8.04308	3.88042	5.12193	4.42033	12.0752	8.78795	9.52673	9.26865
ENSMUSG00000115925	-2.19305780194537	7.78675e-06	0.000281534	down	15:+:84127304-84136259	15:+:84127304-84136259	ENSMUSG00000115925	-	-	AL626769.1	-	0.77236	0.25669	0.39364	1.09907	0.87688	0.76433	1.71244	1.95805	2.31638	1.98711
ENSMUSG00000090124	1.65582	8.21303e-06	0.000290491	up	1:+:88095062-88220002	1:+:88095062-88220002	ENSMUSG00000090124	394432	Q6ZQM8	Ugt1a7c	UDP glucuronosyltransferase 1 family, polypeptide A7C [Source:MGI Symbol;Acc:MGI:3032636]	1.79346	1.78813	1.59499	0.9744	1.6256	1.30509	0.27098	0.32881	0.28381	0.43107
ENSMUSG00000022500	1.07788	6.50901e-06	0.000251481	up	16:-:10959275-11066157	16:-:10959275-11066157	ENSMUSG00000022500	56722	Q9JLJ0	Litaf	Lipopolysaccharide-induced tumor necrosis factor-alpha factor homolog [Source:UniProtKB/Swiss-Prot;Acc:Q9JLJ0]	16.9899	21.9967	16.0431	11.5238	14.527	14.6152	4.98897	7.47244	5.67146	6.36132
ENSMUSG00000031387	1.64477	8.36334e-06	0.000294386	up	X:-:73922121-73930850	X:-:73922121-73930850	ENSMUSG00000031387	19703	P82343	Renbp	N-acylglucosamine 2-epimerase [Source:UniProtKB/Swiss-Prot;Acc:P82343]	7.83934	10.0695	8.0323	5.46019	5.7894	4.43657	1.29185	2.09853	1.18766	1.68476
ENSMUSG00000023992	5.27041	8.11506e-06	0.00028877	up	17:+:48346401-48354147	17:+:48346401-48354147	ENSMUSG00000023992	83433	Q99NH8	Trem2	Triggering receptor expressed on myeloid cells 2 [Source:UniProtKB/Swiss-Prot;Acc:Q99NH8]	15.3806	18.9588	10.382	4.84421	5.71693	7.84583	0.10507	0.31873	0.1529	0.20287
ENSMUSG00000015337	-1.09172309959359	7.61435e-06	0.000277356	down	2:+:30171493-30174069	2:+:30171493-30174069	ENSMUSG00000015337	13804	Q3UN47	Endog	Endonuclease G, mitochondrial [Source:UniProtKB/Swiss-Prot;Acc:O08600]	10.7967	11.2886	11.1514	10.454	11.8852	9.81705	17.599	22.067	19.5053	12.2122
ENSMUSG00000020309	-1.1778259987125	8.39472e-06	0.000294555	down	11:-:30976707-30986350	11:-:30976707-30986350	ENSMUSG00000020309	68044	Q9CQG1	Chac2	Putative glutathione-specific gamma-glutamylcyclotransferase 2 [Source:UniProtKB/Swiss-Prot;Acc:Q9CQG1]	4.20936	3.38828	3.70022	4.05435	4.80377	5.50319	6.59947	9.20681	5.75102	5.96132
ENSMUSG00000049130	1.9431	7.99212e-06	0.000286484	up	7:-:16246743-16259540	7:-:16246743-16259540	ENSMUSG00000049130	12273	P30993	C5ar1	C5a anaphylatoxin chemotactic receptor 1 [Source:UniProtKB/Swiss-Prot;Acc:P30993]	13.5355	23.6807	15.9722	9.44772	10.4171	9.01883	1.98158	3.18966	2.15794	2.83063
ENSMUSG00000042340	-1.18661420684598	8.59468e-06	0.000298936	down	7:+:127712736-127718192	7:+:127712736-127718192	ENSMUSG00000042340	13019	A0A0U1RNJ2	Ctf1	Cardiotrophin-1 [Source:UniProtKB/Swiss-Prot;Acc:Q60753]	2.50572	2.49828	2.66765	2.35949	2.27585	2.75999	4.75784	3.59536	4.14616	3.61013
ENSMUSG00000032511	2.24369	8.71279e-06	0.000301611	up	9:-:119483408-119579016	9:-:119483408-119579016	ENSMUSG00000032511	20271	K3W4N7	Scn5a	Sodium channel protein type 5 subunit alpha [Source:UniProtKB/Swiss-Prot;Acc:Q9JJV9]	2.95518	2.77308	2.92957	1.224	1.86031	1.65146	0.21346	0.295	0.37393	0.46512
ENSMUSG00000011008	2.74934	7.58273e-06	0.000276892	up	3:+:146149833-146195513	3:+:146149833-146195513	ENSMUSG00000011008	68279	Q8K595	Mcoln2	Mucolipin-2 [Source:UniProtKB/Swiss-Prot;Acc:Q8K595]	1.54448	2.49463	1.47986	2.22711	2.67141	2.47207	0.17385	0.38356	0.07667	0.36239
ENSMUSG00000024397	3.03697	8.59155e-06	0.000298936	up	17:-:35170991-35176068	17:-:35170991-35176068	ENSMUSG00000024397	11629	O70200	Aif1	Allograft inflammatory factor 1 [Source:UniProtKB/Swiss-Prot;Acc:O70200]	12.3973	16.2603	8.31192	5.70228	7.1864	6.29825	1.08545	0.94668	0.37023	0.77777
ENSMUSG00000026480	2.15876	8.14121e-06	0.000288784	up	1:+:152800194-152836991	1:+:152800194-152836991	ENSMUSG00000026480	17970	O70145	Ncf2	Neutrophil cytosol factor 2 [Source:UniProtKB/Swiss-Prot;Acc:O70145]	5.89409	7.47711	5.38518	3.03822	3.55519	3.32156	0.49649	1.26441	0.48318	1.10218
ENSMUSG00000029925	1.93986	8.69989e-06	0.000301521	up	6:+:38875404-39084585	6:+:38875404-39084585	ENSMUSG00000029925	21391	P36423	Tbxas1	thromboxane A synthase 1, platelet [Source:MGI Symbol;Acc:MGI:98497]	2.93729	4.09775	2.90296	1.65283	2.15004	1.68379	0.4	0.72113	0.33957	0.45514
ENSMUSG00000078486	-1.56236490364858	6.53595e-06	0.00025219	down	4:+:156215868-156221307	4:+:156215868-156221307	ENSMUSG00000078486	74183	Q149B8	Perm1	PGC-1 and ERR-induced regulator in muscle protein 1 [Source:UniProtKB/Swiss-Prot;Acc:Q149B8]	10.3752	6.35979	14.8351	14.6055	17.4115	10.6466	29.4265	28.029	28.094	32.1041
ENSMUSG00000017760	1.14116	6.21517e-06	0.000243991	up	2:+:164832873-164841032	2:+:164832873-164841032	ENSMUSG00000017760	19025	Q9D2D1	Ctsa	cathepsin A [Source:MGI Symbol;Acc:MGI:97748]	59.9806	66.9434	46.6696	34.7534	39.9886	39.2715	19.4638	22.2271	16.0662	18.3684
ENSMUSG00000038302	-1.13058178073281	8.07178e-06	0.000287987	down	10:-:42312585-42478565	10:-:42312585-42478565	ENSMUSG00000038302	215951	Q3V384	Afg1l	AFG1-like ATPase [Source:UniProtKB/Swiss-Prot;Acc:Q3V384]	3.4168	3.33178	3.82726	4.98678	4.47042	3.81909	7.51152	7.27313	5.87115	5.07733
ENSMUSG00000049988	2.4622	9.07858e-06	0.00031206	up	8:+:70616155-70620890	8:+:70616155-70620890	ENSMUSG00000049988	211228	B9EHD0	Lrrc25	leucine rich repeat containing 25 [Source:MGI Symbol;Acc:MGI:2445284]	17.7353	23.8102	16.0374	8.17369	10.1934	9.90046	1.6172	2.79091	1.3075	1.56132
ENSMUSG00000064373	1.42361	5.75879e-06	0.000231665	up	15:+:3268547-3280508	15:+:3268547-3280508	ENSMUSG00000064373	20363	P70274	Selenop	Selenoprotein P [Source:UniProtKB/Swiss-Prot;Acc:P70274]	258.97	261.728	145.365	251.107	284.275	310.174	63.5768	115.575	69.5855	99.4981
ENSMUSG00000032878	-1.23301391370603	8.14504e-06	0.000288784	down	11:-:28385685-28584324	11:-:28385685-28584324	ENSMUSG00000032878	216613	Q5SP85	Ccdc85a	Coiled-coil domain-containing protein 85A [Source:UniProtKB/Swiss-Prot;Acc:Q5SP85]	1.86492	1.22022	1.75244	1.74155	1.19961	1.3014	2.97438	3.43734	1.80811	2.50097
ENSMUSG00000026580	1.65738	9.16218e-06	0.000314196	up	1:+:164115264-164150026	1:+:164115264-164150026	ENSMUSG00000026580	20344	Q01102	Selp	selectin, platelet [Source:MGI Symbol;Acc:MGI:98280]	1.44995	2.22582	2.0058	1.87769	1.7859	1.30713	0.24729	0.62871	0.31418	0.44054
ENSMUSG00000086604	-1.38435422026936	9.24104e-06	0.00031469	down	7:-:5046949-5057116	7:-:5046949-5057116	ENSMUSG00000086604	102640192	-	Gm15510	predicted gene 15510 [Source:MGI Symbol;Acc:MGI:3782958]	1.86319	1.29603	2.51752	2.24711	1.79663	1.56604	3.10376	3.38959	3.01127	3.85268
ENSMUSG00000030246	-1.03456989450041	6.9283e-06	0.000263239	down	6:-:142490249-142507957	6:-:142490249-142507957	ENSMUSG00000030246	16832	P16125	Ldhb	L-lactate dehydrogenase B chain [Source:UniProtKB/Swiss-Prot;Acc:P16125]	28.6906	29.8953	36.7291	22.5025	20.6542	24.8171	48.8545	55.8678	36.0869	43.6595
ENSMUSG00000026536	2.59089	9.37453e-06	0.000317024	up	1:-:173896345-173913046	1:-:173896345-173913046	ENSMUSG00000026536	381308	Q08619	Mnda	Interferon-activable protein 205-B [Source:UniProtKB/Swiss-Prot;Acc:P0DOV1]	5.66148	8.36771	6.20584	11.5154	9.87526	10.2236	0.58225	2.33152	0.60021	1.12427
ENSMUSG00000020437	1.82635	8.73714e-06	0.00030174	up	11:-:6506548-6520965	11:-:6506548-6520965	ENSMUSG00000020437	246177	Q5SUA5	Myo1g	Unconventional myosin-Ig [Source:UniProtKB/Swiss-Prot;Acc:Q5SUA5]	4.56219	5.79314	4.5908	2.68683	4.50542	2.64573	0.53781	1.44115	0.69752	0.84735
ENSMUSG00000072407	-1.26023583900457	9.41716e-06	0.000317518	down	10:-:74862988-74863416	10:-:74862988-74863416	ENSMUSG00000072407	623346	-	Gm6419	predicted gene 6419 [Source:MGI Symbol;Acc:MGI:3647564]	5.91872	6.96334	6.39505	4.64165	5.18876	6.60082	8.72155	12.3468	9.25492	9.35581
ENSMUSG00000047810	1.98198	9.40701e-06	0.000317518	up	19:-:6844623-6858211	19:-:6844623-6858211	ENSMUSG00000047810	78317	Q4QRL3	Ccdc88b	coiled-coil domain containing 88B	4.00404	4.16571	3.52816	2.04659	2.96016	1.99861	0.54491	0.8901	0.305	0.55644
ENSMUSG00000031101	2.29703	9.5946e-06	0.000322233	up	X:+:48146436-48161565	X:+:48146436-48161565	ENSMUSG00000031101	74131	Q8K352	Sash3	SAM and SH3 domain-containing protein 3 [Source:UniProtKB/Swiss-Prot;Acc:Q8K352]	6.60156	7.7735	5.68492	3.45527	7.19152	4.34876	0.6406	1.50753	0.35313	1.26504
ENSMUSG00000086914	-1.5191398221449	9.18478e-06	0.000314603	down	9:+:53667246-53681265	9:+:53667246-53681265	ENSMUSG00000086914	102636154	-	Gm16124	predicted gene 16124	2.65723	2.06059	3.00952	2.86317	1.98207	3.35371	4.63262	5.98798	4.8854	5.46917
ENSMUSG00000037010	-1.90699874387872	7.40719e-06	0.000272864	down	X:-:48025146-48034853	X:-:48025146-48034853	ENSMUSG00000037010	30878	Q9R0R4	Apln	Apelin Apelin-36 Apelin-31 Apelin-28 Apelin-13 [Source:UniProtKB/Swiss-Prot;Acc:Q9R0R4]	6.3055	4.51811	4.50405	10.9743	11.9406	12.2898	21.6841	22.9881	22.755	25.4318
ENSMUSG00000038526	-1.51770285534463	8.55834e-06	0.000298736	down	3:-:95897768-95904691	3:-:95897768-95904691	ENSMUSG00000038526	23831	Q9WVT6	Car14	Mus musculus carbonic anhydrase 14 (Car14), transcript variant 2, mRNA. [Source:RefSeq mRNA;Acc:NM_001355750]	3.51465	2.42905	5.6995	4.67298	4.9208	3.19629	9.74743	9.79455	7.85602	6.4612
ENSMUSG00000037280	2.73876	9.65111e-06	0.00032339	up	15:-:100691813-100729376	15:-:100691813-100729376	ENSMUSG00000037280	207839	Q8C7U7	Galnt6	Polypeptide N-acetylgalactosaminyltransferase 6 [Source:UniProtKB/Swiss-Prot;Acc:Q8C7U7]	4.47349	4.91799	4.6134	1.92488	2.79749	2.66873	0.20137	0.71674	0.22793	0.51842
ENSMUSG00000026042	1.1335	5.88371e-06	0.000234131	up	1:-:45374321-45503282	1:-:45374321-45503282	ENSMUSG00000026042	12832	Q3U962	Col5a2	Collagen alpha-2(V) chain [Source:UniProtKB/Swiss-Prot;Acc:Q3U962]	155.705	146.658	119.659	102.523	98.8893	108.767	44.9439	68.4811	41.3245	54.6966
ENSMUSG00000030844	1.51429	9.04837e-06	0.000311387	up	7:-:128373621-128418758	7:-:128373621-128418758	ENSMUSG00000030844	67865	Q9CQE5	Rgs10	regulator of G-protein signalling 10 [Source:MGI Symbol;Acc:MGI:1915115]	18.372	22.7266	12.9182	11.3377	12.6934	11.0029	3.09791	5.45438	2.79932	3.84856
ENSMUSG00000039004	-1.07787860002348	8.59311e-06	0.000298936	down	13:+:38345107-38500302	13:+:38345107-38500302	ENSMUSG00000039004	12161	P20722	Bmp6	bone morphogenetic protein 6	2.72143	2.36282	4.26055	3.07996	2.94637	2.74301	4.78353	5.44878	4.31456	4.30952
ENSMUSG00000061132	2.01165	9.86798e-06	0.000327703	up	19:-:40928927-40994535	19:-:40928927-40994535	ENSMUSG00000061132	17060	Q9QUN3	Blnk	B-cell linker protein [Source:UniProtKB/Swiss-Prot;Acc:Q9QUN3]	1.9835	2.78048	1.71077	1.23301	1.6971	1.48803	0.15613	0.55784	0.2735	0.37684
ENSMUSG00000000594	1.22288	7.42565e-06	0.0002732	up	11:+:55098115-55113029	11:+:55098115-55113029	ENSMUSG00000000594	14667	Q5F1Z8	Gm2a	Ganglioside GM2 activator [Source:UniProtKB/Swiss-Prot;Acc:Q60648]	25.2129	33.0757	19.2781	17.3232	20.0004	22.643	6.83728	11.1843	6.03187	8.28172
ENSMUSG00000052384	1.0009	8.19331e-06	0.000290144	up	16:-:32142785-32165594	16:-:32142785-32165594	ENSMUSG00000052384	224109	Q8BMT4	Nrros	Mus musculus negative regulator of reactive oxygen species (Nrros), transcript variant 2, mRNA. [Source:RefSeq mRNA;Acc:NM_001347181]	9.67752	12.958	9.02178	7.48916	10.1541	9.00152	3.33418	5.04215	3.07791	3.76849
ENSMUSG00000000290	2.51758	8.72316e-06	0.000301613	up	10:+:77530252-77565708	10:+:77530252-77565708	ENSMUSG00000000290	16414	Q542I8	Itgb2	integrin beta 2	25.3747	33.4282	29.1383	11.3021	18.7463	13.0584	1.6516	5.04126	1.98233	3.47265
ENSMUSG00000037860	1.45904	9.81485e-06	0.000327113	up	1:+:173350879-173466040	1:+:173350879-173466040	ENSMUSG00000037860	383619	Q91VJ1	Aim2	Interferon-inducible protein AIM2 [Source:UniProtKB/Swiss-Prot;Acc:Q91VJ1]	1.72612	1.86561	1.56725	1.41276	2.21675	1.28815	0.32655	0.50431	0.34202	0.51947
ENSMUSG00000034623	-3.94667347174743	3.9918e-06	0.000188859	down	14:-:64075438-64090162	14:-:64075438-64090162	ENSMUSG00000034623	71037	G3X9K6	Prss55	protease, serine 55 [Source:MGI Symbol;Acc:MGI:1918287]	0.18098	0	0.03689	0.04578	0	0.11213	0.6667	0.67417	0.58395	0.44699
ENSMUSG00000112593	-2.62099508289633	4.9596e-06	0.000211115	down	10:+:95318247-95324358	10:+:95318247-95324358	ENSMUSG00000112593	-	-	Gm48882	predicted gene, 48882 [Source:MGI Symbol;Acc:MGI:6098637]	0.43281	0.23973	0.19607	0.12166	0.34183	0.14898	0.93499	1.07484	1.13391	1.06897
ENSMUSG00000033182	-1.33115774765856	8.69576e-06	0.000301521	down	6:-:88545114-88637950	6:-:88545114-88637950	ENSMUSG00000033182	74589	Q9D618	Kbtbd12	Kelch repeat and BTB domain-containing protein 12 [Source:UniProtKB/Swiss-Prot;Acc:Q9D618]	1.11515	1.02008	1.34637	1.54749	1.62252	1.53166	2.3986	1.97621	2.71408	3.4161
ENSMUSG00000085348	-1.48458105114011	8.13886e-06	0.000288784	down	11:-:67211256-67237573	11:-:67211256-67237573	ENSMUSG00000085348	102633540	-	Myhas	myosin heavy chain gene antisense RNA [Source:MGI Symbol;Acc:MGI:3650429]	9.41997	6.61935	11.6449	14.0067	15.1369	10.4259	26.9956	18.3541	24.7796	26.855
ENSMUSG00000042010	-1.07108427660752	6.98896e-06	0.000263761	down	5:+:114146535-114250761	5:+:114146535-114250761	ENSMUSG00000042010	100705	E9Q4Z2	Acacb	acetyl-Coenzyme A carboxylase beta [Source:MGI Symbol;Acc:MGI:2140940]	10.4918	7.54325	14.0695	13.5578	12.1235	10.0502	20.9385	20.2487	22.933	20.3727
ENSMUSG00000010064	-1.3246485276687	8.45386e-06	0.000295794	down	9:-:107650634-107669530	9:-:107650634-107669530	ENSMUSG00000010064	76257	Q9DCP2	Slc38a3	Sodium-coupled neutral amino acid transporter 3 [Source:UniProtKB/Swiss-Prot;Acc:Q9DCP2]	3.9071	2.43708	4.62018	5.02726	3.87624	3.20979	6.24339	7.16965	6.50877	10.1373
ENSMUSG00000040345	1.82058	1.04818e-05	0.000341838	up	10:+:127321964-127329943	10:+:127321964-127329943	ENSMUSG00000040345	216445	Q1HDU4	Arhgap9	Rho GTPase activating protein 9	4.86773	5.44154	4.66106	3.07009	5.05186	2.97717	0.72728	1.48193	0.41604	1.12609
ENSMUSG00000023047	-1.71720258340274	1.02673e-05	0.000336716	down	15:+:102445367-102454633	15:+:102445367-102454633	ENSMUSG00000023047	110542	Q8K592	Amhr2	Mus musculus anti-Mullerian hormone type 2 receptor (Amhr2), transcript variant 2, mRNA. [Source:RefSeq mRNA;Acc:NM_001356575]	0.58254	0.68182	0.67125	0.51259	0.39007	0.65386	1.19223	1.72975	1.38302	1.09474
ENSMUSG00000026443	1.50055	1.0297e-05	0.000336938	up	1:+:132880273-132940005	1:+:132880273-132940005	ENSMUSG00000026443	16980	Q6PHP6	Lrrn2	leucine rich repeat protein 2, neuronal [Source:MGI Symbol;Acc:MGI:106037]	6.93582	8.64754	5.93231	4.14531	4.45145	4.47817	1.24313	1.54354	1.63032	1.36067
ENSMUSG00000046480	-1.79178870582182	7.39671e-06	0.000272821	down	9:+:45138395-45154152	9:+:45138395-45154152	ENSMUSG00000046480	399548	Q7M729	Scn4b	Sodium channel subunit beta-4 [Source:UniProtKB/Swiss-Prot;Acc:Q7M729]	12.3032	7.32748	25.0922	20.539	19.0435	13.9994	47.0217	49.3749	45.1094	46.374
ENSMUSG00000037613	1.36685	1.05069e-05	0.000342192	up	7:-:143665809-143685872	7:-:143665809-143685872	ENSMUSG00000037613	79201	Q3U3F7	Tnfrsf23	tumor necrosis factor receptor superfamily, member 23 [Source:MGI Symbol;Acc:MGI:1930269]	4.52455	4.66446	2.96576	4.78273	4.31244	4.98986	0.98371	1.19366	0.9703	1.72532
ENSMUSG00000021624	2.40045	1.10808e-05	0.000355046	up	13:+:102693558-102739629	13:+:102693558-102739629	ENSMUSG00000021624	17079	Q62192	Cd180	CD180 antigen [Source:UniProtKB/Swiss-Prot;Acc:Q62192]	3.36749	4.49162	3.86879	1.59553	2.74857	2.00037	0.28812	0.47548	0.29351	0.52852
ENSMUSG00000052099	-4.00718445933092	4.39642e-06	0.000197778	down	14:+:64086234-64097678	14:+:64086234-64097678	ENSMUSG00000052099	100504162	E9PXD1	Prss51	Mus musculus protease, serine 51 (Prss51), transcript variant 2, mRNA. [Source:RefSeq mRNA;Acc:NM_001347631]	0.04082	0	0.12483	0	0.04836	0	0.20887	0.40551	0.75991	0.8066
ENSMUSG00000087028	-1.65980287977956	1.04036e-05	0.000339665	down	2:-:25122603-25145396	2:-:25122603-25145396	ENSMUSG00000087028	329358	-	Gm13387	predicted gene 13387	0.33491	0.31634	0.35935	0.5574	0.50117	0.36404	0.66739	0.8536	1.02812	0.97955
ENSMUSG00000025938	-1.20761713158954	8.28973e-06	0.000292146	down	1:-:12866549-12992650	1:-:12866549-12992650	ENSMUSG00000025938	240726	E9PVD9	Slco5a1	solute carrier organic anion transporter family, member 5A1 [Source:MGI Symbol;Acc:MGI:2443431]	2.21887	1.70738	3.21528	2.95331	3.12325	2.7623	4.24445	4.91036	5.33456	5.21297
ENSMUSG00000056359	-1.84490041995216	1.00385e-05	0.000331068	down	12:-:73364075-73409557	12:-:73364075-73409557	ENSMUSG00000056359	380765	Q8C3I6	D830013O20Rik	RIKEN cDNA D830013O20 gene	0.88446	1.17577	1.80309	1.77134	1.39708	1.06554	3.69569	2.74559	2.92698	3.82286
ENSMUSG00000006800	1.18192	8.09024e-06	0.000288237	up	2:-:166073089-166155663	2:-:166073089-166155663	ENSMUSG00000006800	72043	Q8CFG0	Sulf2	Mus musculus sulfatase 2 (Sulf2), transcript variant 4, mRNA. [Source:RefSeq mRNA;Acc:NM_001355619]	30.1011	23.3712	17.3427	16.4224	19.1521	20.6776	6.52339	10.4397	5.85024	8.97275
ENSMUSG00000099583	-1.79587734598625	1.09593e-05	0.000352846	down	13:+:23575763-23577011	13:+:23575763-23577011	ENSMUSG00000099583	319149	P84228	Hist1h3d	Histone H3.2 [Source:UniProtKB/Swiss-Prot;Acc:P84228]	0.77251	0.72968	1.24332	1.23429	1.3487	1.04964	2.87081	1.96896	2.82563	2.41011
ENSMUSG00000089809	1.26123	1.11936e-05	0.000357876	up	5:-:99217426-99729065	5:-:99217426-99729065	ENSMUSG00000089809	320292	Q8JZL7	Rasgef1b	Ras-GEF domain-containing family member 1B [Source:UniProtKB/Swiss-Prot;Acc:Q8JZL7]	0.95275	1.08562	1.06865	0.7026	0.74957	0.83569	0.28985	0.25122	0.26021	0.24077
ENSMUSG00000023885	1.1145	7.5794e-06	0.000276892	up	17:-:14665500-14694262	17:-:14665500-14694262	ENSMUSG00000023885	21826	Q03350	Thbs2	thrombospondin 2	62.8652	54.6501	48.9229	36.4776	36.7248	39.9984	20.0247	24.5967	13.0258	20.0784
ENSMUSG00000022014	2.08347	1.15143e-05	0.000364548	up	14:+:77904239-78002657	14:+:77904239-78002657	ENSMUSG00000022014	108670	Q8VDI1	Epsti1	epithelial stromal interaction 1 (breast)	4.37593	4.97374	3.67988	5.09227	7.9576	5.08357	0.6269	1.38557	0.43444	1.24291
ENSMUSG00000035104	-1.4899890322038	1.1431e-05	0.000363088	down	6:+:82041043-82093099	6:+:82041043-82093099	ENSMUSG00000035104	232146	Q91WM6	Eva1a	A [Source:UniProtKB/Swiss-Prot;Acc:Q91WM6]	0.74228	0.57762	0.84889	0.6183	0.45041	0.71041	1.33388	1.50618	1.16832	1.11788
ENSMUSG00000067653	-1.20992734641213	9.04468e-06	0.000311387	down	1:-:36530188-36536883	1:-:36530188-36536883	ENSMUSG00000067653	78321	Q812A3	Ankrd23	Ankyrin repeat domain-containing protein 23 [Source:UniProtKB/Swiss-Prot;Acc:Q812A3]	8.69914	6.43926	8.73284	10.2175	8.45429	8.32193	18.0541	11.2694	18.1798	15.3237
ENSMUSG00000012819	-1.06177465509244	1.09462e-05	0.000352846	down	10:-:60302748-60696490	10:-:60302748-60696490	ENSMUSG00000012819	22295	Q99PF4	Cdh23	Cadherin-23 [Source:UniProtKB/Swiss-Prot;Acc:Q99PF4]	0.52465	0.33179	0.39115	0.35646	0.3161	0.41793	0.49392	0.67007	0.56552	0.59977
ENSMUSG00000033405	-1.15464084771828	1.14296e-05	0.000363088	down	14:-:73518877-73548242	14:-:73518877-73548242	ENSMUSG00000033405	214254	Q8BG93	Nudt15	nudix (nucleoside diphosphate linked moiety X)-type motif 15	1.14931	0.91955	1.374	1.23839	1.44563	1.42125	2.23603	2.11424	1.47913	2.01509
ENSMUSG00000030579	2.84125	1.03255e-05	0.00033749	up	7:+:30413760-30417585	7:+:30413760-30417585	ENSMUSG00000030579	22177	O54885	Tyrobp	TYRO protein tyrosine kinase binding protein [Source:MGI Symbol;Acc:MGI:1277211]	157.449	180.589	120.989	51.3298	76.4873	77.048	10.7516	21.4602	4.91323	11.6588
ENSMUSG00000110453	-2.00917203322631	1.10321e-05	0.000353874	down	8:-:119659475-119670881	8:-:119659475-119670881	ENSMUSG00000110453	102634871	-	Gm32352	predicted gene, 32352 [Source:MGI Symbol;Acc:MGI:5591511]	0.95956	1.0303	2.40761	1.96065	2.71077	0.83843	4.00319	3.84942	3.66405	5.0134
ENSMUSG00000030218	1.83005	8.00733e-06	0.000286678	up	6:-:136872435-136875823	6:-:136872435-136875823	ENSMUSG00000030218	17313	P19788	Mgp	matrix Gla protein [Source:MGI Symbol;Acc:MGI:96976]	387.565	424.633	248.309	176.523	147.388	220.936	64.9683	85.7406	42.8993	59.8073
ENSMUSG00000046070	-1.9581051460753	1.18931e-05	0.000370701	down	17:+:24878770-24882008	17:+:24878770-24882008	ENSMUSG00000046070	16005	P70389	Igfals	insulin-like growth factor binding protein, acid labile subunit	0.55329	1.22322	0.63754	1.58228	2.10893	1.29174	2.60937	4.30138	2.92568	2.46575
ENSMUSG00000017754	1.39149	9.28734e-06	0.00031548	up	2:-:164839518-164857711	2:-:164839518-164857711	ENSMUSG00000017754	18830	Q3UFS5	Pltp	phospholipid transfer protein [Source:MGI Symbol;Acc:MGI:103151]	28.0672	27.9443	17.5374	28.2562	34.8712	31.8282	6.51095	11.6171	5.97746	10.8928
ENSMUSG00000026548	2.18286	1.17415e-05	0.00036895	up	1:+:172475358-172478575	1:+:172475358-172478575	ENSMUSG00000026548	98365	A0A0R4J072	Slamf9	SLAM family member 9 [Source:MGI Symbol;Acc:MGI:1923692]	5.99491	9.44766	5.95302	5.77279	4.99437	3.87408	0.83114	1.63286	0.43198	1.00303
ENSMUSG00000038618	1.8217	1.21694e-05	0.00037515	up	7:+:141215860-141218658	7:+:141215860-141218658	ENSMUSG00000038618	66985	Q9DD19	Rassf7	Ras association domain-containing protein 7 [Source:UniProtKB/Swiss-Prot;Acc:Q9DD19]	6.95491	4.06652	3.84503	4.32405	4.32917	5.98895	0.72376	0.81968	0.93625	1.45574
ENSMUSG00000048677	1.25491	1.05982e-05	0.00034372	up	7:-:145186524-145284011	7:-:145186524-145284011	ENSMUSG00000048677	233979	Q8BWC0	Tpcn2	Two pore calcium channel protein 2 [Source:UniProtKB/Swiss-Prot;Acc:Q8BWC0]	6.28986	7.95697	7.06137	4.41185	4.77309	4.25026	1.52259	2.00353	1.72662	1.93294
ENSMUSG00000067081	-1.7060749646204	1.16684e-05	0.000367837	down	1:-:89950220-90014666	1:-:89950220-90014666	ENSMUSG00000067081	208372	Q8VHA6	Asb18	Ankyrin repeat and SOCS box protein 18 [Source:UniProtKB/Swiss-Prot;Acc:Q8VHA6]	1.09224	0.60215	1.4015	1.85292	1.979	1.5923	2.48521	4.11658	3.25314	2.93571
ENSMUSG00000038967	-1.08936507589416	7.9423e-06	0.000285396	down	11:-:95026258-95041354	11:-:95026258-95041354	ENSMUSG00000038967	18604	Q9JK42	Pdk2	[Pyruvate dehydrogenase (acetyl-transferring)] kinase isozyme 2, mitochondrial [Source:UniProtKB/Swiss-Prot;Acc:Q9JK42]	44.3606	33.3276	57.9498	56.1722	55.7108	52.904	97.8693	88.6946	115.324	88.7858
ENSMUSG00000052135	-1.01537518033391	1.0525e-05	0.000342192	down	4:-:120267079-120287349	4:-:120267079-120287349	ENSMUSG00000052135	329934	Q70KY4	Foxo6	Forkhead box protein O6 [Source:UniProtKB/Swiss-Prot;Acc:Q70KY4]	6.44736	4.68562	4.86955	4.54432	6.32674	5.93583	8.56493	9.0426	9.20622	6.90684
ENSMUSG00000047592	2.84406	1.26826e-05	0.000384495	up	5:+:138225898-138253363	5:+:138225898-138253363	ENSMUSG00000047592	381680	E9PXC9	Nxpe5	neurexophilin and PC-esterase domain family, member 5	5.19974	7.26707	3.4486	2.22588	3.08004	3.11849	0.31368	0.67667	0.16907	0.54679
ENSMUSG00000021200	-1.10186763706697	8.3875e-06	0.000294555	down	12:-:103321142-103356001	12:-:103321142-103356001	ENSMUSG00000021200	65256	Q8K0L0	Asb2	Ankyrin repeat and SOCS box protein 2 [Source:UniProtKB/Swiss-Prot;Acc:Q8K0L0]	28.4595	18.7117	30.4853	34.2753	33.7666	33.4448	52.4354	53.9599	58.5913	63.4391
ENSMUSG00000022383	-1.6323604980059	1.24883e-05	0.000380972	down	15:+:85734983-85802819	15:+:85734983-85802819	ENSMUSG00000022383	19013	P23204	Ppara	peroxisome proliferator activated receptor alpha [Source:MGI Symbol;Acc:MGI:104740]	0.76783	0.54116	1.40339	1.54056	1.42719	1.13465	2.35716	2.64656	1.69219	2.84465
ENSMUSG00000078816	-1.48605731409913	1.24757e-05	0.000380972	down	7:+:3289179-3331099	7:+:3289179-3331099	ENSMUSG00000078816	18752	Q3UN66	Prkcg	protein kinase C, gamma [Source:MGI Symbol;Acc:MGI:97597]	0.78733	1.06534	1.76272	1.61831	1.68226	0.94368	2.15805	2.53136	2.02395	3.4204
ENSMUSG00000044788	-1.30063283938398	1.27418e-05	0.000385891	down	11:-:115279622-115297663	11:-:115279622-115297663	ENSMUSG00000044788	328035	Q80UG1	Fads6	Fatty acid desaturase 6 [Source:UniProtKB/Swiss-Prot;Acc:Q80UG1]	0.67934	0.49467	0.75471	0.62757	0.90428	0.55963	1.4372	1.30796	0.73887	1.17829
ENSMUSG00000026114	-2.53349789845519	1.16386e-05	0.000367292	down	1:+:37214434-37263384	1:+:37214434-37263384	ENSMUSG00000026114	12790	Q9JJZ8	Cnga3	Cyclic nucleotide-gated cation channel alpha-3 [Source:UniProtKB/Swiss-Prot;Acc:Q9JJZ8]	0.20534	0.05118	0.18314	0.22726	0.42571	0.11927	0.6041	0.60555	0.89189	0.69734
ENSMUSG00000090939	3.34263	3.81988e-06	0.000184602	up	6:+:65128571-65129002	6:+:65128571-65129002	ENSMUSG00000090939	102632836	-	Gm17147	predicted gene 17147 [Source:MGI Symbol;Acc:MGI:4937974]	2.11594	1.64084	2.15682	2.37906	2.50673	2.18499	0.12029	0	0.14588	0.14517
ENSMUSG00000048486	-1.06208179594029	9.23253e-06	0.00031469	down	2:-:163466379-163472629	2:-:163466379-163472629	ENSMUSG00000048486	228859	P59266	Fitm2	Fat storage-inducing transmembrane protein 2 [Source:UniProtKB/Swiss-Prot;Acc:P59266]	14.3374	12.2144	14.6274	21.5842	19.8213	18.3083	31.3472	32.9512	28.2938	25.7208
ENSMUSG00000056380	-1.88732765252186	1.34002e-05	0.000398818	down	X:+:71663667-71669257	X:+:71663667-71669257	ENSMUSG00000056380	14765	O88495	Gpr50	Melatonin-related receptor [Source:UniProtKB/Swiss-Prot;Acc:O88495]	0.59569	0.24747	0.37107	1.1093	0.74491	0.71765	1.28687	1.7259	1.33477	1.47128
ENSMUSG00000029816	5.14	1.35184e-05	0.000401114	up	6:+:49036546-49070929	6:+:49036546-49070929	ENSMUSG00000029816	93695	Q99P91	Gpnmb	Transmembrane glycoprotein NMB [Source:UniProtKB/Swiss-Prot;Acc:Q99P91]	25.9215	30.9745	20.7643	6.29131	10.9259	8.98416	0.28719	0.46465	0.1161	0.60653
ENSMUSG00000018459	4.33	1.18364e-05	0.000369948	up	2:-:165405028-165473230	2:-:165405028-165473230	ENSMUSG00000018459	114644	Q91Y63	Slc13a3	solute carrier family 13 (sodium-dependent dicarboxylate transporter), member 3 [Source:MGI Symbol;Acc:MGI:2149635]	2.82396	5.93212	3.98029	2.22942	2.72256	1.86028	0.01993	0.19346	0.21752	0.15633
ENSMUSG00000029499	-1.2946236758781	1.23546e-05	0.000379263	down	5:-:110274282-110286186	5:-:110274282-110286186	ENSMUSG00000029499	19301	Q5D073	Pxmp2	peroxisomal membrane protein 2 [Source:HGNC Symbol;Acc:HGNC:9716]	5.20522	4.68344	6.9881	6.53051	8.8237	6.38018	14.204	9.51111	10.6086	11.0271
ENSMUSG00000051439	2.16362	1.30927e-05	0.000392459	up	18:-:36725074-36726736	18:-:36725074-36726736	ENSMUSG00000051439	12475	Q3UB18	Cd14	CD14 antigen	18.8658	24.5751	17.1887	9.52076	9.75903	11.0751	1.52063	3.57003	2.16487	2.39363
ENSMUSG00000034353	-1.11362830599818	1.02806e-05	0.000336774	down	1:+:91179822-91225196	1:+:91179822-91225196	ENSMUSG00000034353	51801	Q9WTJ5	Ramp1	receptor (calcitonin) activity modifying protein 1 [Source:MGI Symbol;Acc:MGI:1858418]	9.89774	9.95211	13.7032	7.80082	7.68444	7.75665	19.2422	17.4231	11.5116	17.7016
ENSMUSG00000061232	1.43047	9.46069e-06	0.000318466	up	17:-:33996017-34000333	17:-:33996017-34000333	ENSMUSG00000061232	14972	P01901	H2-K1	histocompatibility 2, K1, K region [Source:MGI Symbol;Acc:MGI:95904]	60.5575	78.7044	51.724	81.6724	114.21	74.4171	22.2369	33.0518	18.1719	25.2969
ENSMUSG00000010362	-1.10003646950899	1.22312e-05	0.000376262	down	11:+:101627195-101636100	11:+:101627195-101636100	ENSMUSG00000010362	66599	Q9CQK3	Rdm1	RAD52 motif-containing protein 1 [Source:UniProtKB/Swiss-Prot;Acc:Q9CQK3]	6.41635	6.65446	6.50743	5.99522	6.30264	5.29392	13.4616	10.1292	6.4022	10.3526
ENSMUSG00000074677	5.50292	5.30971e-06	0.000219633	up	3:-:15795145-15848528	3:-:15795145-15848528	ENSMUSG00000074677	100038947	Q1AN90	Sirpb1c	signal-regulatory protein beta 1C [Source:MGI Symbol;Acc:MGI:3807521]	2.22053	2.03517	1.70109	0.55826	1.27447	0.93999	0	0.01713	0.03423	0.01703
ENSMUSG00000016349	-1.31494634498535	8.04962e-06	0.00028784	down	2:-:181147653-181157014	2:-:181147653-181157014	ENSMUSG00000016349	13628	P62631	Eef1a2	Elongation factor 1-alpha 2 [Source:UniProtKB/Swiss-Prot;Acc:P62631]	231.202	161.152	271.635	343.488	371.564	307.342	562.324	606.334	846.649	579.073
ENSMUSG00000031548	1.16956	1.12375e-05	0.000358702	up	8:+:23411502-23449632	8:+:23411502-23449632	ENSMUSG00000031548	20377	Q8C4U3	Sfrp1	Secreted frizzled-related protein 1 [Source:UniProtKB/Swiss-Prot;Acc:Q8C4U3]	11.9987	12.4147	7.8498	9.78504	9.88015	13.086	2.74568	5.07687	3.15685	4.38935
ENSMUSG00000081700	-1.32592651255618	1.37723e-05	0.000405769	down	2:-:173984482-173984691	2:-:173984482-173984691	ENSMUSG00000081700	102631836	-	Atp5k-ps2	ATP synthase, H+ transporting, mitochondrial F1F0 complex, subunit E, pseudogene 2 [Source:MGI Symbol;Acc:MGI:107356]	8.46378	7.23311	5.91585	6.72933	8.30803	7.74112	10.6406	13.5122	12.3042	15.2303
ENSMUSG00000070031	1.77806	1.38492e-05	0.0004064	up	1:+:85600378-85645037	1:+:85600378-85645037	ENSMUSG00000070031	434484	Q6NSQ5	Sp140	Sp140 nuclear body protein [Source:MGI Symbol;Acc:MGI:3702467]	1.80059	2.06909	1.46208	1.91082	2.60314	1.37087	0.24984	0.51158	0.24618	0.56532
ENSMUSG00000072621	2.41386	9.70326e-06	0.000324765	up	11:-:83028130-83040042	11:-:83028130-83040042	ENSMUSG00000072621	237887	-	Slfn10-ps	schlafen 10, pseudogene	0.50488	0.90888	0.90061	0.79827	1.14641	0.69514	0.07176	0.1219	0.10443	0.10392
ENSMUSG00000040350	-1.10402240782244	9.77161e-06	0.000326525	down	11:+:48826140-48852209	11:+:48826140-48852209	ENSMUSG00000040350	94089	Q923T7	Trim7	tripartite motif-containing 7 [Source:MGI Symbol;Acc:MGI:2137353]	8.77684	5.79829	10.4522	11.2962	10.3424	9.2013	18.4688	16.1606	16.7239	16.8319
ENSMUSG00000036246	1.14277	1.25018e-05	0.000380986	up	8:+:69808679-69821870	8:+:69808679-69821870	ENSMUSG00000036246	78816	Q6PGG2	Gmip	Gem-interacting protein [Source:MGI Symbol;Acc:MGI:1926066]	5.72585	6.41105	5.50082	3.86425	5.41801	3.57974	1.60053	1.87399	1.27133	2.11228
ENSMUSG00000053168	-2.09042780860905	1.20706e-05	0.000373282	down	15:-:75427606-75431829	15:-:75427606-75431829	ENSMUSG00000053168	105892	Q5M8M1	9030619P08Rik	lymphocyte antigen 6 complex pseudogene	0.59744	0.48736	0.33217	0.8244	0.70778	1.28996	1.66735	2.76507	1.55026	2.2134
ENSMUSG00000020782	-1.40370555155032	1.36808e-05	0.000403888	down	11:+:115824049-115855780	11:+:115824049-115855780	ENSMUSG00000020782	217325	Q8BVC8	Llgl2	Lethal(2) giant larvae protein homolog 2 [Source:UniProtKB/Swiss-Prot;Acc:Q3TJ91]	0.98546	0.93027	1.87008	1.21998	1.35376	0.77945	2.67124	2.08281	2.05562	1.92904
ENSMUSG00000055639	-1.42675471994633	1.23695e-05	0.000379316	down	14:-:97786853-98169765	14:-:97786853-98169765	ENSMUSG00000055639	13134	Q3UTV2	Dach1	Dachshund homolog 1 [Source:UniProtKB/Swiss-Prot;Acc:Q9QYB2]	0.99941	1.27323	1.74031	2.12447	1.78421	1.74154	3.28116	4.04179	3.27296	2.33128
ENSMUSG00000055172	1.02199	1.1177e-05	0.000357738	up	6:+:124512405-124523443	6:+:124512405-124523443	ENSMUSG00000055172	50909	Q9CTX0	C1ra	Complement C1r-A subcomponent Complement C1r-A subcomponent heavy chain Complement C1r-A subcomponent light chain [Source:UniProtKB/Swiss-Prot;Acc:Q8CG16]	22.5549	26.4624	19.9519	30.7059	29.4451	30.908	9.51807	12.586	8.09704	12.6015
ENSMUSG00000024338	1.62047	1.47374e-05	0.000423552	up	17:+:34197721-34201454	17:+:34197721-34201454	ENSMUSG00000024338	16913	P28063	Psmb8	Proteasome subunit beta type-8 [Source:UniProtKB/Swiss-Prot;Acc:P28063]	5.77244	7.32828	6.73533	5.1181	5.78307	4.13999	1.84236	1.88987	0.59889	1.37529
ENSMUSG00000060802	1.3603	9.81809e-06	0.000327113	up	2:+:122147686-122153083	2:+:122147686-122153083	ENSMUSG00000060802	12010	P01887	B2m	Beta-2-microglobulin [Source:UniProtKB/Swiss-Prot;Acc:P01887]	317.864	413.179	262.189	394.37	532.15	412.506	108.645	197.31	108.529	139.5
ENSMUSG00000021223	-1.32318195619604	1.28095e-05	0.000386601	down	12:+:83763634-83792382	12:+:83763634-83792382	ENSMUSG00000021223	170721	Q9EPX2	Papln	Papilin [Source:UniProtKB/Swiss-Prot;Acc:Q9EPX2]	2.40621	1.63531	3.0406	2.8726	2.77587	2.13109	4.97065	6.50154	4.05978	3.45006
ENSMUSG00000086741	-1.22937285370306	1.49207e-05	0.000427241	down	8:-:23138794-23149585	8:-:23138794-23149585	ENSMUSG00000086741	101056408	-	Gm15816	predicted gene 15816 [Source:MGI Symbol;Acc:MGI:3802114]	2.97837	2.12965	3.18923	4.1859	3.77792	2.7649	5.26432	4.48273	4.62955	6.42735
ENSMUSG00000045136	1.94815	1.25157e-05	0.000381013	up	13:-:34126748-34130466	13:-:34126748-34130466	ENSMUSG00000045136	73710	Q9CWF2	Tubb2b	tubulin, beta 2B class IIB	54.236	44.7166	27.4839	19.9648	19.7479	28.0258	6.8865	7.20181	4.89008	6.04168
ENSMUSG00000035849	-1.73520104955121	1.45446e-05	0.000420071	down	11:-:99232761-99244085	11:-:99232761-99244085	ENSMUSG00000035849	268481	Q8CCX5	Krt222	Keratin-like protein KRT222 [Source:UniProtKB/Swiss-Prot;Acc:Q8CCX5]	1.14153	1.26118	1.27365	2.5366	2.50369	2.99474	3.52017	4.86528	5.30285	4.15294
ENSMUSG00000049625	2.87793	1.58822e-05	0.000447237	up	13:-:56173704-56178885	13:-:56173704-56178885	ENSMUSG00000049625	212937	Q8JZM6	Tifab	TRAF-interacting protein with forkhead-associated domain, family member B	9.65698	9.09258	5.55087	3.45327	5.17833	3.82389	0.38636	1.22616	0.2523	0.82494
ENSMUSG00000060594	1.20637	1.59612e-05	0.00044903	up	9:-:51054640-51077094	9:-:51054640-51077094	ENSMUSG00000060594	244864	Q8C351	Layn	layilin [Source:MGI Symbol;Acc:MGI:2685357]	4.21608	5.04426	3.48099	3.17306	3.84594	3.50469	0.99229	1.49201	1.2034	0.98925
ENSMUSG00000007617	-1.05820655265171	1.1506e-05	0.000364548	down	13:+:93299635-93405129	13:+:93299635-93405129	ENSMUSG00000007617	26556	Q3UVL6	Homer1	Homer protein homolog 1 [Source:UniProtKB/Swiss-Prot;Acc:Q9Z2Y3]	2.89617	3.01863	3.12501	4.01734	4.64172	4.36123	5.46301	5.89186	6.89365	6.80754
ENSMUSG00000039899	1.23849	1.19728e-05	0.000371145	up	5:+:21372642-21378374	5:+:21372642-21378374	ENSMUSG00000039899	14190	P12804	Fgl2	Fibroleukin [Source:UniProtKB/Swiss-Prot;Acc:P12804]	19.3719	29.3525	19.3636	31.3711	27.1902	24.8217	5.99501	11.4195	7.27045	11.1586
ENSMUSG00000032279	-1.01995902881264	9.90092e-06	0.000328379	down	9:+:54586334-54604661	9:+:54586334-54604661	ENSMUSG00000032279	67834	Q9D6R2	Idh3a	Isocitrate dehydrogenase [NAD] subunit alpha, mitochondrial [Source:UniProtKB/Swiss-Prot;Acc:Q9D6R2]	47.5987	41.2581	51.8862	64.969	66.8989	65.9323	101.606	111.618	118.513	97.3092
ENSMUSG00000039496	-1.3418040134539	1.34883e-05	0.000400627	down	2:+:3513030-3526376	2:+:3513030-3526376	ENSMUSG00000039496	227526	Q8CC36	Cdnf	Cerebral dopamine neurotrophic factor [Source:UniProtKB/Swiss-Prot;Acc:Q8CC36]	3.4606	3.33639	4.59234	6.81369	5.66613	5.10745	10.4733	7.94548	9.25776	8.60769
ENSMUSG00000053040	1.97169	1.68246e-05	0.000467038	up	9:-:66814994-66834726	9:-:66814994-66834726	ENSMUSG00000053040	68318	Q9DCZ9	Aph1c	Putative gamma-secretase subunit APH-1C [Source:UniProtKB/Swiss-Prot;Acc:Q9DCZ9]	1.68788	1.97469	1.18345	0.87621	1.50259	1.42056	0.18969	0.29075	0.14529	0.45785
ENSMUSG00000050335	3.81162	1.44287e-05	0.000417963	up	14:+:47367751-47386160	14:+:47367751-47386160	ENSMUSG00000050335	16854	Q8C253	Lgals3	galectin 3 [Source:HGNC Symbol;Acc:HGNC:6563]	118.894	183.915	124.45	34.2261	44.1983	44.5089	3.1325	6.21068	3.05272	5.29923
ENSMUSG00000019970	-1.14251137598303	1.07265e-05	0.000347112	down	10:+:21882184-21999903	10:+:21882184-21999903	ENSMUSG00000019970	20393	Q9WVC6	Sgk1	Serine/threonine-protein kinase Sgk1 [Source:UniProtKB/Swiss-Prot;Acc:Q9WVC6]	32.0667	30.1952	19.9749	34.9012	27.8783	42.0224	62.4587	70.2078	65.7466	50.2549
ENSMUSG00000051506	1.63583	1.52405e-05	0.000433753	up	14:-:32959547-33185508	14:-:32959547-33185508	ENSMUSG00000051506	545030	E9PV60	Wdfy4	WD repeat and FYVE domain containing 4 [Source:MGI Symbol;Acc:MGI:3584510]	2.7095	3.64671	3.21316	2.11234	3.53489	1.91829	0.40875	1.20712	0.45988	0.85583
ENSMUSG00000079057	1.65264	1.72168e-05	0.000474775	up	8:-:45304944-45333216	8:-:45304944-45333216	ENSMUSG00000079057	102294	B2RSR0	Cyp4v3	Cytochrome P450 4V2 [Source:UniProtKB/Swiss-Prot;Acc:Q9DBW0]	3.2806	3.55007	2.33807	2.51338	3.19134	2.82305	0.53221	1.39097	0.31445	0.7411
ENSMUSG00000064267	1.82327	1.74237e-05	0.000479127	up	5:+:122206804-122242297	5:+:122206804-122242297	ENSMUSG00000064267	74096	Q3U2S8	Hvcn1	Mus musculus hydrogen voltage-gated channel 1 (Hvcn1), transcript variant 3, mRNA. [Source:RefSeq mRNA;Acc:NM_001359454]	3.12136	1.9042	1.94677	2.00113	3.32636	2.00163	0.56881	0.60172	0.283	0.40483
ENSMUSG00000005148	1.06999	1.46612e-05	0.00042219	up	14:+:99298691-99315036	14:+:99298691-99315036	ENSMUSG00000005148	12224	Q9Z0Z7	Klf5	Kruppel-like factor 5	7.06915	6.18173	5.20523	5.03897	5.35566	5.82777	1.97832	1.58825	2.69002	2.19454
ENSMUSG00000030790	-1.29003669519548	1.64119e-05	0.000459501	down	7:+:110627661-110629820	7:+:110627661-110629820	ENSMUSG00000030790	11535	P97297	Adm	ADM Adrenomedullin Proadrenomedullin N-20 terminal peptide [Source:UniProtKB/Swiss-Prot;Acc:P97297]	2.79163	3.72154	2.84556	4.32462	4.64496	3.07707	5.97014	8.37386	6.26713	4.29967
ENSMUSG00000002346	-1.08280403193869	1.33899e-05	0.000398818	down	8:-:70184340-70212305	8:-:70184340-70212305	ENSMUSG00000002346	73095	Q8R0Y8	Slc25a42	Mitochondrial coenzyme A transporter SLC25A42 [Source:UniProtKB/Swiss-Prot;Acc:Q8R0Y8]	3.26073	2.99771	4.29925	4.99221	5.06698	4.17175	6.95941	7.66655	6.37994	6.12907
ENSMUSG00000033220	1.97871	1.55352e-05	0.000439153	up	15:-:78559167-78572783	15:-:78559167-78572783	ENSMUSG00000033220	19354	Q05144	Rac2	RAS-related C3 botulinum substrate 2	14.1072	17.1492	14.997	8.0319	15.2585	9.22724	1.54072	5.58837	1.34045	2.99115
ENSMUSG00000029560	1.02166	1.44721e-05	0.000418803	up	5:-:140340299-140389262	5:-:140340299-140389262	ENSMUSG00000029560	231834	Q8CFD4	Snx8	sorting nexin 8 [Source:MGI Symbol;Acc:MGI:2443816]	12.876	16.1528	12.6931	9.46259	9.97738	9.10166	4.58994	4.94642	3.71746	4.35777
ENSMUSG00000095788	4.42381	7.03984e-06	0.000264658	up	3:-:15371653-15426520	3:-:15371653-15426520	ENSMUSG00000095788	320832	Q6F5F2	Sirpb1a	signal-regulatory protein beta 1A [Source:MGI Symbol;Acc:MGI:2444824]	1.19697	1.34812	0.54226	0.75702	0.76154	0.52646	0	0.05505	0	0.08212
ENSMUSG00000015396	1.69318	1.68799e-05	0.000468131	up	13:+:43784775-43803132	13:+:43784775-43803132	ENSMUSG00000015396	12522	O88324	Cd83	CD83 antigen	8.3124	8.20896	5.03146	8.69114	9.63708	11.4992	1.33349	2.45168	1.39667	2.46269
ENSMUSG00000099757	1.87611	1.81654e-05	0.000492451	up	19:-:11470166-11484578	19:-:11470166-11484578	ENSMUSG00000099757	100504727	-	BE692007	expressed sequence BE692007 [Source:MGI Symbol;Acc:MGI:3035348]	1.40632	1.90498	1.0677	1.14091	2.13714	1.11169	0.16872	0.28903	0.30091	0.33536
ENSMUSG00000029158	-1.04020729536305	1.29523e-05	0.000389046	down	5:-:69516671-69542648	5:-:69516671-69542648	ENSMUSG00000029158	75581	Q9JIM5	Yipf7	Yip1 domain family, member 7 [Source:MGI Symbol;Acc:MGI:1922831]	29.4531	29.1164	35.7547	49.3747	40.9138	43.1908	60.5345	62.1777	59.1959	73.1053
ENSMUSG00000087090	-1.45367974824445	1.28068e-05	0.000386601	down	7:-:142544609-142558596	7:-:142544609-142558596	ENSMUSG00000087090	330677	-	Nctc1	non-coding transcript 1	12.2156	8.24717	13.8217	22.5325	17.639	14.7039	35.9136	32.9408	25.4616	38.0693
ENSMUSG00000068205	-1.22019164137981	1.71467e-05	0.000474181	down	2:+:140395309-142392966	2:+:140395309-142392966	ENSMUSG00000068205	72899	Q3UYG8	Macrod2	O-acetyl-ADP-ribose deacetylase MACROD2 [Source:UniProtKB/Swiss-Prot;Acc:Q3UYG8]	0.46802	0.67293	0.66286	0.84749	0.79959	0.69696	1.44686	0.97265	1.02713	1.14378
ENSMUSG00000008822	-1.42983311040585	1.73607e-05	0.000477996	down	12:-:85272398-85288438	12:-:85272398-85288438	ENSMUSG00000008822	66204	Q4VAF0	Acyp1	Acylphosphatase-1 [Source:UniProtKB/Swiss-Prot;Acc:P56376]	4.85747	5.57683	5.02633	4.14266	4.01077	3.87599	14.686	9.1844	6.5305	6.95298
ENSMUSG00000017057	1.14014	1.48203e-05	0.000425517	up	X:+:36112110-36171259	X:+:36112110-36171259	ENSMUSG00000017057	16164	O09030	Il13ra1	Interleukin-13 receptor subunit alpha-1 [Source:UniProtKB/Swiss-Prot;Acc:O09030]	12.5178	20.1327	12.7596	10.9019	12.5283	10.6236	3.93384	6.06449	3.71814	5.16978
ENSMUSG00000021536	-1.09019407722431	1.39566e-05	0.000407939	down	13:-:68620043-68999541	13:-:68620043-68999541	ENSMUSG00000021536	210044	Q3V1Q3	Adcy2	adenylate cyclase 2	6.99452	5.63911	8.16221	8.93883	9.52927	7.9575	13.5869	10.6617	14.9659	14.714
ENSMUSG00000081194	-2.40664496893238	1.90529e-05	0.000508183	down	X:-:150924620-150926159	X:-:150924620-150926159	ENSMUSG00000081194	667021	-	Gm8424	predicted gene 8424 [Source:MGI Symbol;Acc:MGI:3646584]	1.85038	1.48615	1.46699	2.60059	4.38424	4.93614	4.83893	9.70109	13.5867	13.5836
ENSMUSG00000038859	1.93155	1.93203e-05	0.000512392	up	5:-:144264526-144358112	5:-:144264526-144358112	ENSMUSG00000038859	66898	Q9DBJ3	Baiap2l1	Brain-specific angiosis inhibitor 1-associated protein 2-like protein 1 [Source:UniProtKB/Swiss-Prot;Acc:Q9DBJ3]	5.52182	4.09145	2.50668	2.57625	2.84186	4.34662	0.52491	0.63694	0.58041	0.8943
ENSMUSG00000029822	1.09499	1.71665e-05	0.000474282	up	6:-:50293330-50456201	6:-:50293330-50456201	ENSMUSG00000029822	71720	Q9DBS9	Osbpl3	Oxysterol-binding protein-related protein 3 [Source:UniProtKB/Swiss-Prot;Acc:Q9DBS9]	2.8935	2.43028	2.88054	2.15041	2.26748	1.9997	0.69703	0.699	0.91518	1.12621
ENSMUSG00000032122	2.6936	1.78331e-05	0.000486275	up	9:-:37227585-37255738	9:-:37227585-37255738	ENSMUSG00000032122	56857	Q9WU81	Slc37a2	solute carrier family 37 (glycerol-3-phosphate transporter), member 2 [Source:MGI Symbol;Acc:MGI:1929693]	8.34019	10.2056	7.87014	4.38995	4.79083	4.11277	0.3442	2.43002	0.45537	0.70804
ENSMUSG00000052760	1.57387	1.96771e-05	0.000517756	up	1:-:85717083-85778643	1:-:85717083-85778643	ENSMUSG00000052760	319997	Q3UTB2	A630001G21Rik	RIKEN cDNA A630001G21 gene [Source:MGI Symbol;Acc:MGI:2443131]	3.48674	3.60721	3.64964	2.98765	4.53044	2.20677	0.63303	1.09401	0.46528	1.08805
ENSMUSG00000054978	-1.40571539880845	1.73662e-05	0.000477996	down	9:-:65388684-65391652	9:-:65388684-65391652	ENSMUSG00000054978	74492	Q9D3I7	Kbtbd13	Kelch repeat and BTB domain-containing protein 13 [Source:UniProtKB/Swiss-Prot;Acc:Q8C828]	2.95904	2.21695	4.18433	2.20678	2.45185	2.43742	7.01863	5.18219	3.20521	6.10444
ENSMUSG00000097413	-1.46985758003796	1.98017e-05	0.000520383	down	18:-:32359057-32378284	18:-:32359057-32378284	ENSMUSG00000097413	402767	-	A830052D11Rik	RIKEN cDNA A830052D11 gene	1.34821	1.47863	1.51168	1.70534	1.75693	1.80987	3.26511	2.39952	3.56937	3.16341
ENSMUSG00000085022	-2.26961449582167	1.93332e-05	0.000512392	down	4:+:82065431-82102808	4:+:82065431-82102808	ENSMUSG00000085022	545641	-	Gm5860	predicted gene 5860	0.11227	0.29849	0.82013	0.33135	0.59851	0.40576	0.89992	1.67285	1.13783	1.38644
ENSMUSG00000028459	2.88792	1.84177e-05	0.000496885	up	4:-:43446462-43454628	4:-:43446462-43454628	ENSMUSG00000028459	12517	P21855	Cd72	B-cell differentiation antigen CD72 [Source:UniProtKB/Swiss-Prot;Acc:P21855]	2.41893	2.82603	2.85895	1.40783	2.40857	1.44049	0.06074	0.55281	0.18417	0.2749
ENSMUSG00000042246	-1.01133901754931	1.71258e-05	0.000474051	down	7:-:118535841-118584736	7:-:118535841-118584736	ENSMUSG00000042246	209760	Q8C428	Tmc7	Transmembrane channel-like protein 7 [Source:UniProtKB/Swiss-Prot;Acc:Q8C428]	1.72712	1.42328	1.98504	2.07316	2.17137	2.14746	3.1019	2.68072	2.50424	3.22108
ENSMUSG00000039179	3.17089	1.01708e-05	0.000334676	up	16:-:10357948-10395490	16:-:10357948-10395490	ENSMUSG00000039179	70426	G5E8A8	Tekt5	Tektin-5 [Source:UniProtKB/Swiss-Prot;Acc:G5E8A8]	1.7143	1.56911	1.00262	1.67074	1.43163	1.91534	0.17255	0.06979	0.03488	0.24294
ENSMUSG00000016024	1.04775	1.5033e-05	0.000429101	up	2:+:158306493-158332852	2:+:158306493-158332852	ENSMUSG00000016024	16803	Q61805	Lbp	Lipopolysaccharide-binding protein [Source:UniProtKB/Swiss-Prot;Acc:Q61805]	10.9533	18.1524	12.8043	12.565	13.1008	12.2334	4.11984	6.19998	3.8614	6.88014
ENSMUSG00000026253	2.94533	1.9651e-05	0.000517536	up	1:+:87204657-87212694	1:+:87204657-87212694	ENSMUSG00000026253	11449	F8VQK4	Chrng	cholinergic receptor, nicotinic, gamma polypeptide [Source:MGI Symbol;Acc:MGI:87895]	17.9197	11.8948	9.2262	4.01176	6.09853	8.28859	1.03607	0.9997	0.49957	0.84361
ENSMUSG00000081809	3.2784	6.66738e-06	0.000256248	up	16:+:3927606-3928171	16:+:3927606-3928171	ENSMUSG00000081809	100416290	-	Gm15539	predicted gene 15539 [Source:MGI Symbol;Acc:MGI:3782987]	0.62805	1.07346	0.18291	0.45395	0.63776	0.46325	0	0	0	0
ENSMUSG00000063320	-1.10929388070314	1.89281e-05	0.000505372	down	10:-:82619851-82623228	10:-:82619851-82623228	ENSMUSG00000063320	544717	Q8BTC1	1190007I07Rik	RIKEN cDNA 1190007I07 gene [Source:MGI Symbol;Acc:MGI:3698433]	7.00012	7.6561	7.78401	5.58094	4.57369	5.82665	11.6348	8.74476	9.84548	9.53533
ENSMUSG00000000278	1.1111	1.57062e-05	0.000443132	up	11:-:88924020-88955465	11:-:88924020-88955465	ENSMUSG00000000278	74617	Q920A5	Scpep1	serine carboxypeptidase 1 [Source:MGI Symbol;Acc:MGI:1921867]	40.3936	44.4024	29.8437	23.7089	32.3329	30.0585	13.0596	16.0875	8.83565	11.9325
ENSMUSG00000029862	-1.5437358893275	1.42853e-05	0.000414627	down	6:+:42286685-42315756	6:+:42286685-42315756	ENSMUSG00000029862	12723	Q64347	Clcn1	Chloride channel protein 1 [Source:UniProtKB/Swiss-Prot;Acc:Q64347]	8.52303	5.14899	11.7298	14.1652	13.7215	11.9506	26.1074	23.78	27.1221	26.0997
ENSMUSG00000057191	2.04291	2.14644e-05	0.000549962	up	9:+:21526176-21545333	9:+:21526176-21545333	ENSMUSG00000057191	382062	Q75VT8	AB124611	chromosome 19 open reading frame 38 [Source:HGNC Symbol;Acc:HGNC:34073]	13.3361	12.8416	10.3384	5.32698	7.48382	6.92191	1.1133	2.22247	1.04528	2.12367
ENSMUSG00000070570	-1.67767669109428	2.22477e-05	0.000564598	down	7:+:45163949-45176142	7:+:45163949-45176142	ENSMUSG00000070570	72961	Q8JZR7	Slc17a7	Vesicular glutamate transporter 1 [Source:UniProtKB/Swiss-Prot;Acc:Q3TXX4]	0.64043	0.61036	0.60481	0.51226	0.56904	0.30149	1.15651	1.77757	1.34412	0.72111
ENSMUSG00000034449	-1.02845692402244	1.81011e-05	0.000491295	down	11:-:84820856-84828994	11:-:84820856-84828994	ENSMUSG00000034449	192970	Q3U0B3	Dhrs11	Dehydrogenase/reductase SDR family member 11 [Source:UniProtKB/Swiss-Prot;Acc:Q3U0B3]	9.85241	7.45421	13.8855	8.93593	11.6345	8.04753	15.3337	16.3642	13.1311	16.3531
ENSMUSG00000109108	-1.33640094144145	2.25301e-05	0.000570283	down	7:+:6156516-6157618	7:+:6156516-6157618	ENSMUSG00000109108	102640259	-	Gm36371	predicted gene, 36371 [Source:MGI Symbol;Acc:MGI:5595530]	1.15101	1.2394	1.45483	1.39767	1.30905	1.664	2.40277	2.57259	2.28546	2.27428
ENSMUSG00000021003	1.33704	2.00039e-05	0.000524472	up	12:-:98202294-98259459	12:-:98202294-98259459	ENSMUSG00000021003	14420	P54818	Galc	galactosylceramidase	1.98639	2.32418	1.60033	1.12677	1.50414	1.34633	0.34926	0.52975	0.3685	0.72496
ENSMUSG00000049404	-1.43668293840488	2.28719e-05	0.000575914	down	3:-:67478972-67515523	3:-:67478972-67515523	ENSMUSG00000049404	109222	F6ZIS7	Rarres1	retinoic acid receptor responder 1 [Source:HGNC Symbol;Acc:HGNC:9867]	1.11147	1.37566	1.09387	1.40589	1.18053	1.54351	2.94146	2.85542	1.99767	1.94056
ENSMUSG00000025777	-1.91310727892487	2.29349e-05	0.000576048	down	1:+:17145362-17164271	1:+:17145362-17164271	ENSMUSG00000025777	14545	O88741	Gdap1	Ganglioside-induced differentiation-associated protein 1 [Source:UniProtKB/Swiss-Prot;Acc:O88741]	0.19706	0.13753	0.34817	0.44867	0.32684	0.36629	0.6789	0.54648	0.74181	1.15189
ENSMUSG00000030562	1.18645	2.10798e-05	0.000542004	up	7:+:87246096-87398710	7:+:87246096-87398710	ENSMUSG00000030562	50490	B2RSM1	Nox4	NADPH oxidase 4 [Source:MGI Symbol;Acc:MGI:1354184]	2.48788	2.32508	1.60711	1.78197	1.54115	2.30287	0.65026	0.7295	0.4315	0.71071
ENSMUSG00000078949	6.32305	1.37946e-05	0.000406011	up	2:+:163492318-163502612	2:+:163492318-163502612	ENSMUSG00000078949	100043899	A2A5I3	R3hdml	R3H domain containing-like [Source:MGI Symbol;Acc:MGI:3650937]	5.80241	4.53557	1.84532	0.52844	0.98986	5.60828	0	0	0	0
ENSMUSG00000022901	1.23474	2.29099e-05	0.000575914	up	16:-:36603869-36666081	16:-:36603869-36666081	ENSMUSG00000022901	12524	Q549Q9	Cd86	T-lymphocyte activation antigen CD86 [Source:UniProtKB/Swiss-Prot;Acc:P42082]	3.30136	3.52666	2.60162	2.57921	3.94394	3.46638	0.70972	1.39514	0.68857	1.16484
ENSMUSG00000021939	1.89993	1.33816e-05	0.000398818	up	14:+:63122462-63145923	14:+:63122462-63145923	ENSMUSG00000021939	13030	P10605	Ctsb	cathepsin B	311.041	402.427	261.393	153.405	194.613	192.981	61.2237	82.0336	57.6891	60.5781
ENSMUSG00000036975	-1.03415250964719	2.16693e-05	0.000553759	down	1:-:119907890-119913208	1:-:119907890-119913208	ENSMUSG00000036975	66343	Q8BPE4	Tmem177	Transmembrane protein 177 [Source:UniProtKB/Swiss-Prot;Acc:Q8BPE4]	1.89998	2.56114	2.15359	2.03797	1.5306	2.2759	3.34411	3.05754	3.07469	2.74053
ENSMUSG00000027577	-1.47969752232066	2.37662e-05	0.000588978	down	2:-:181018380-181043546	2:-:181018380-181043546	ENSMUSG00000027577	11438	Q53YK0	Chrna4	cholinergic receptor, nicotinic, alpha polypeptide 4 [Source:MGI Symbol;Acc:MGI:87888]	0.53594	0.31254	0.37107	0.86976	0.71878	0.49077	0.87955	1.09239	0.79059	1.27374
ENSMUSG00000022237	-1.0612088357888	1.82581e-05	0.000494183	down	15:-:31291478-31367726	15:-:31291478-31367726	ENSMUSG00000022237	67434	Q3U0L2	Ankrd33b	Ankyrin repeat domain-containing protein 33B [Source:UniProtKB/Swiss-Prot;Acc:Q3U0L2]	1.93601	1.75688	2.67652	2.87409	2.8704	2.12489	3.97411	3.65632	3.12195	4.47389
ENSMUSG00000057948	2.12522	2.39223e-05	0.000592214	up	11:-:116062095-116077961	11:-:116062095-116077961	ENSMUSG00000057948	70450	Q80UG7	Unc13d	unc-13 homolog D (C. elegans) [Source:MGI Symbol;Acc:MGI:1917700]	1.77994	1.94779	1.54882	1.04335	2.05725	1.52422	0.15549	0.64688	0.12122	0.34848
ENSMUSG00000052560	1.05801	2.21844e-05	0.000564598	up	15:-:90487482-90679432	15:-:90487482-90679432	ENSMUSG00000052560	66871	Q9DC53	Cpne8	Mus musculus copine VIII (Cpne8), transcript variant 3, mRNA. [Source:RefSeq mRNA;Acc:NM_001357979]	3.80504	4.96104	3.53047	3.47088	3.51087	2.59428	1.06078	1.55977	0.9989	1.35547
ENSMUSG00000101972	-2.06123555743519	2.20608e-05	0.000562291	down	13:-:21782960-21783370	13:-:21782960-21783370	ENSMUSG00000101972	319153	P68433	Hist1h3i	Histone H3.1 [Source:UniProtKB/Swiss-Prot;Acc:P68433]	1.11203	1.60149	2.26702	2.18804	1.17103	2.29663	5.94257	5.8301	5.06013	3.50949
ENSMUSG00000000942	-1.15438397422174	2.33798e-05	0.000582141	down	6:-:52189671-52191753	6:-:52189671-52191753	ENSMUSG00000000942	15401	P06798	Hoxa4	homeobox A4 [Source:MGI Symbol;Acc:MGI:96176]	2.80356	2.12819	3.31236	3.10292	2.79295	3.05954	5.15095	5.41959	3.99321	3.46221
ENSMUSG00000003812	1.19227	2.11456e-05	0.000543219	up	8:+:84908560-84922915	8:+:84908560-84922915	ENSMUSG00000003812	100503676	S4R1G0,D3Z5U3,D3Z512,Q3UM14	Dnase2a	predicted gene, 38426	5.33364	6.62375	4.16876	3.54011	3.84034	3.68801	1.13787	1.90728	1.12267	1.79214
ENSMUSG00000023004	1.02358	1.53483e-05	0.000435975	up	15:-:98931425-98934565	15:-:98931425-98934565	ENSMUSG00000023004	22143	P05213	Tuba1b	tubulin, alpha 1B [Source:MGI Symbol;Acc:MGI:107804]	164.455	225.372	155.098	103.597	120.804	129.128	68.0684	70.5567	65.4081	56.0906
ENSMUSG00000032860	-1.02944235474127	1.7029e-05	0.000471819	down	7:-:100996568-101012866	7:-:100996568-101012866	ENSMUSG00000032860	18442	A0A0R4J289	P2ry2	purinergic receptor P2Y2 [Source:HGNC Symbol;Acc:HGNC:8541]	10.0091	8.83187	16.2528	12.7586	12.5471	9.88171	21.2125	18.4177	19.3061	18.9241
ENSMUSG00000033538	1.80813	2.48047e-05	0.000606173	up	9:+:5308828-5336783	9:+:5308828-5336783	ENSMUSG00000033538	12363	P70343	Casp4	Caspase-4 Caspase-4 subunit p10 Caspase-4 subunit p20 [Source:UniProtKB/Swiss-Prot;Acc:P70343]	2.05321	3.38455	2.39983	3.72248	3.14591	2.55838	0.32216	0.59488	0.45865	1.08184
ENSMUSG00000021886	2.94117	2.17644e-05	0.000555703	up	12:+:98268635-98276644	12:+:98268635-98276644	ENSMUSG00000021886	14744	Q3UQ35	Gpr65	G-protein coupled receptor 65	4.39347	4.16017	2.02651	1.83172	2.29713	3.01611	0.10047	0.51811	0.27414	0.2728
ENSMUSG00000042684	2.43496	2.47994e-05	0.000606173	up	1:-:153503015-153550045	1:-:153503015-153550045	ENSMUSG00000042684	74091	Q9DCJ9	Npl	N-acetylneuraminate lyase [Source:UniProtKB/Swiss-Prot;Acc:Q9DCJ9]	8.24939	11.3712	5.45433	3.6879	4.36837	4.09105	0.84241	1.00091	0.44696	0.82601
ENSMUSG00000056124	1.04475	1.96397e-05	0.000517536	up	18:-:20684599-20746404	18:-:20684599-20746404	ENSMUSG00000056124	56386	Q3UUA9	B4galt6	UDP-Gal:betaGlcNAc beta 1,4-galactosyltransferase, polypeptide 6	8.83975	8.83963	7.2102	5.28652	6.1736	5.91393	2.71103	2.2691	2.36548	3.27171
ENSMUSG00000033581	1.12393	2.04322e-05	0.000531494	up	16:-:22059009-22163299	16:-:22059009-22163299	ENSMUSG00000033581	319765	Q5SF07	Igf2bp2	Insulin-like growth factor 2 mRNA-binding protein 2 [Source:UniProtKB/Swiss-Prot;Acc:Q5SF07]	3.46812	5.46008	5.21194	5.09841	4.54734	4.70642	1.19512	1.60937	1.6173	2.3745
ENSMUSG00000035566	-1.03359794851962	1.958e-05	0.000517061	down	14:+:84443563-84539002	14:+:84443563-84539002	ENSMUSG00000035566	219228	Q3UTP0	Pcdh17	protocadherin 17	1.4229	1.29006	1.33882	1.64159	1.75052	1.18273	2.56009	3.14533	1.72217	1.83442
ENSMUSG00000101086	-1.51993464072735	2.39973e-05	0.000593068	down	14:+:32685648-32689250	14:+:32685648-32689250	ENSMUSG00000101086	102640484	-	Gm28651	predicted gene 28651 [Source:MGI Symbol;Acc:MGI:5579357]	1.1317	1.02087	2.06908	1.31786	2.57501	2.15176	3.01465	2.87738	3.72289	3.85995
ENSMUSG00000097317	-1.81835039420325	2.37287e-05	0.000588913	down	2:-:91250743-91255995	2:-:91250743-91255995	ENSMUSG00000097317	100503319	-	Gm17281	predicted gene, 17281 [Source:MGI Symbol;Acc:MGI:4936915]	0.89142	0.69127	1.68748	1.87925	1.64275	1.62185	4.08314	2.16105	3.59973	4.01895
ENSMUSG00000060572	1.0288	1.75306e-05	0.000480499	up	4:+:141010418-141015984	4:+:141010418-141015984	ENSMUSG00000060572	17150	Q99PM0	Mfap2	microfibril associated protein 2 [Source:HGNC Symbol;Acc:HGNC:7033]	112.888	122.252	82.4116	72.0848	74.4692	98.9471	41.1951	43.0621	28.3103	40.704
ENSMUSG00000020644	1.54695	2.10476e-05	0.000541653	up	12:-:25093799-25097140	12:-:25093799-25097140	ENSMUSG00000020644	15902	P41136	Id2	inhibitor of DNA binding 2	19.2466	26.4996	20.2978	11.8035	11.6474	14.0671	4.62535	5.89705	2.92102	4.42439
ENSMUSG00000055493	-1.04040076011016	1.88929e-05	0.000505295	down	10:+:11343404-11459644	10:+:11343404-11459644	ENSMUSG00000055493	13853	Q9WUA5	Epm2a	Laforin [Source:UniProtKB/Swiss-Prot;Acc:Q9WUA5]	7.50848	5.9304	8.17321	10.2595	8.52914	9.44459	13.4381	11.7788	15.1658	13.737
ENSMUSG00000030499	-1.00066572149723	1.87338e-05	0.000502416	down	7:-:34639014-34656732	7:-:34639014-34656732	ENSMUSG00000030499	233107	Q8K0E1	Kctd15	BTB/POZ domain-containing protein KCTD15 [Source:UniProtKB/Swiss-Prot;Acc:Q8K0E1]	6.42272	5.80628	9.06292	8.92735	7.97801	6.86741	14.0399	11.5461	12.2385	10.2845
ENSMUSG00000110834	-1.25915431265495	2.22356e-05	0.000564598	down	9:-:124270358-124282139	9:-:124270358-124282139	ENSMUSG00000110834	105243585	-	Gm39469	predicted gene, 39469 [Source:MGI Symbol;Acc:MGI:5622354]	16.5236	18.8908	16.6183	24.802	24.0124	33.4432	36.0718	37.3418	43.4726	38.7706
ENSMUSG00000029322	2.52984	2.60428e-05	0.000628763	up	5:-:100553725-100572245	5:-:100553725-100572245	ENSMUSG00000029322	231507	Q9JI48	Plac8	Placenta-specific 8 protein [Source:UniProtKB/Swiss-Prot;Acc:Q9JI48]	8.48504	9.35034	8.64896	15.3727	17.3456	15.3169	0.88133	3.96087	0.98966	1.29996
ENSMUSG00000042363	-1.03519261025163	1.79834e-05	0.000489008	down	11:-:20823576-20831056	11:-:20823576-20831056	ENSMUSG00000042363	216551	Q8VED9	Lgalsl	Galectin-related protein [Source:UniProtKB/Swiss-Prot;Acc:Q8VED9]	10.0455	9.9664	14.051	17.4206	15.585	12.5652	21.3294	20.9475	22.115	25.451
ENSMUSG00000018924	2.88388	2.62911e-05	0.000633713	up	11:-:70344152-70352031	11:-:70344152-70352031	ENSMUSG00000018924	11687	P39654	Alox15	Arachidonate 15-lipoxygenase [Source:UniProtKB/Swiss-Prot;Acc:P39654]	3.39379	3.4456	4.91481	2.06786	3.898	6.21841	0.23294	0.89935	0.20545	0.38333
ENSMUSG00000028337	1.76265	2.74691e-05	0.000648235	up	4:-:46536937-46602202	4:-:46536937-46602202	ENSMUSG00000028337	107684	Q8C0P5	Coro2a	Coronin-2A [Source:UniProtKB/Swiss-Prot;Acc:Q8C0P5]	1.6275	1.45804	1.54674	0.8851	1.4251	1.02298	0.28159	0.41979	0.11709	0.34954
ENSMUSG00000038602	-1.11629402541773	2.57369e-05	0.000623619	down	10:+:52690533-53111622	10:+:52690533-53111622	ENSMUSG00000038602	215085	Q8BGK5	Slc35f1	Solute carrier family 35 member F1 [Source:UniProtKB/Swiss-Prot;Acc:Q8BGK5]	0.8325	0.78904	1.11049	1.37803	1.37589	1.125	1.57759	1.78668	1.37752	1.86578
ENSMUSG00000089718	-1.88875133740062	2.6701e-05	0.000637819	down	9:+:112227579-112228242	9:+:112227579-112228242	ENSMUSG00000089718	70194	-	2310075C17Rik	RIKEN cDNA 2310075C17 gene [Source:MGI Symbol;Acc:MGI:1917444]	3.1155	1.39781	3.49325	2.75854	3.87544	4.18232	4.78214	9.09105	7.92603	10.7728
ENSMUSG00000048621	4.08047	1.17246e-05	0.000368815	up	X:+:109196756-109200439	X:+:109196756-109200439	ENSMUSG00000048621	622976	Q8BHV4	Gm6377	predicted gene 6377	0.98113	1.41298	1.03713	0.57455	0.88251	0.71296	0	0.02256	0.09019	0.06731
ENSMUSG00000081890	3.66657	1.19485e-05	0.000371145	up	4:+:76793729-76794122	4:+:76793729-76794122	ENSMUSG00000081890	667858	-	Gm11243	predicted gene 11243 [Source:MGI Symbol;Acc:MGI:3652116]	1.80446	0.64253	0.91966	2.11941	1.22155	2.66192	0.13189	0	0	0
ENSMUSG00000031958	-1.04308487690914	2.30688e-05	0.000577924	down	8:-:111623785-111630374	8:-:111623785-111630374	ENSMUSG00000031958	52815	Q7TNG8	Ldhd	Probable D-lactate dehydrogenase, mitochondrial [Source:UniProtKB/Swiss-Prot;Acc:Q7TNG8]	2.1636	2.12866	2.48714	2.73672	2.11153	1.9783	4.52556	3.37299	3.52486	2.71898
ENSMUSG00000027848	1.4525	2.01445e-05	0.000526272	up	3:-:103722222-103738001	3:-:103722222-103738001	ENSMUSG00000027848	99543	A0A0R4J086	Olfml3	olfactomedin like 3 [Source:HGNC Symbol;Acc:HGNC:24956]	21.134	20.0522	14.3671	9.86298	11.0148	12.7929	3.8209	6.66291	3.32447	3.84768
ENSMUSG00000042286	1.23808	1.76294e-05	0.000481662	up	14:-:31139013-31168641	14:-:31139013-31168641	ENSMUSG00000042286	192187	G3X973	Stab1	stabilin 1 [Source:MGI Symbol;Acc:MGI:2178742]	32.9831	40.2574	28.2768	19.8048	22.0869	17.886	8.12724	13.5087	8.50866	9.64349
ENSMUSG00000004626	1.81729	2.67743e-05	0.000638009	up	8:+:3630955-3643644	8:+:3630955-3643644	ENSMUSG00000004626	20911	Q64324	Stxbp2	syntaxin binding protein 2 [Source:MGI Symbol;Acc:MGI:107370]	4.61549	7.07311	5.11538	3.2125	4.61446	2.69827	0.53728	1.48584	0.71219	1.0706
ENSMUSG00000028841	1.02417	2.49009e-05	0.000607706	up	4:-:134228041-134238399	4:-:134228041-134238399	ENSMUSG00000028841	194231	A2A9K7	Cnksr1	connector enhancer of kinase suppressor of Ras 1 [Source:MGI Symbol;Acc:MGI:2670958]	6.06711	7.2589	7.42118	7.26189	6.80143	6.78875	2.29806	2.00146	2.24756	3.73505
ENSMUSG00000063011	3.47646	2.84025e-05	0.00066173	up	17:-:25748614-25754327	17:-:25748614-25754327	ENSMUSG00000063011	56047	Q61468	Msln	mesothelin	12.8758	8.62225	5.16657	4.70972	4.41109	7.66504	0.12291	0.56674	0.38755	1.27562
ENSMUSG00000014609	-1.27827814589582	2.2513e-05	0.000570283	down	11:-:70614883-70619216	11:-:70614883-70619216	ENSMUSG00000014609	11448	P20782	Chrne	cholinergic receptor, nicotinic, epsilon polypeptide [Source:MGI Symbol;Acc:MGI:87894]	8.2935	6.83079	13.2625	10.2623	9.61161	8.34693	21.4321	13.395	20.0252	15.6597
ENSMUSG00000025475	2.87964	1.88828e-05	0.000505295	up	7:+:139834174-139878088	7:+:139834174-139878088	ENSMUSG00000025475	52389	Q6PHM3	Adgra1	Adhesion G protein-coupled receptor A1 [Source:UniProtKB/Swiss-Prot;Acc:Q8C4G9]	0.56572	0.99647	0.59587	0.4532	0.39095	0.39919	0.04824	0.05854	0.0234	0.06986
ENSMUSG00000100455	-1.46276757230953	2.78929e-05	0.000654545	down	1:+:143777642-143781307	1:+:143777642-143781307	ENSMUSG00000100455	-	-	Gm29170	predicted gene 29170 [Source:MGI Symbol;Acc:MGI:5579876]	0.84499	0.88391	1.22843	1.0513	0.86977	1.54487	2.12626	1.47924	1.95976	2.83971
ENSMUSG00000031963	1.2967	2.39772e-05	0.000593068	up	9:+:23223076-23485200	9:+:23223076-23485200	ENSMUSG00000031963	73230	Q8CJ69	Bmper	BMP-binding endothelial regulator protein [Source:UniProtKB/Swiss-Prot;Acc:Q8CJ69]	7.69148	11.021	6.06212	6.28656	5.93773	5.19732	2.5483	2.76601	1.56478	1.76474
ENSMUSG00000097715	1.0929	2.46209e-05	0.000603386	up	13:-:12615057-12650388	13:-:12615057-12650388	ENSMUSG00000097715	664862	-	Gpr137b-ps	G protein-coupled receptor 137B, pseudogene [Source:MGI Symbol;Acc:MGI:3710533]	5.69636	7.46163	6.94792	4.56288	6.40397	4.87036	1.63082	3.32935	1.80405	1.9149
ENSMUSG00000027843	1.74861	2.87191e-05	0.000668043	up	3:+:103859795-103912247	3:+:103859795-103912247	ENSMUSG00000027843	19260	P29352	Ptpn22	Tyrosine-protein phosphatase non-receptor type 22 [Source:UniProtKB/Swiss-Prot;Acc:P29352]	0.73457	0.70249	0.72584	0.5025	0.77255	0.47989	0.09204	0.20476	0.07442	0.20364
ENSMUSG00000025129	-1.02609565396291	1.90967e-05	0.000508752	down	11:-:120549979-120551132	11:-:120549979-120551132	ENSMUSG00000025129	68701	Q9D119	Ppp1r27	Protein phosphatase 1 regulatory subunit 27 [Source:UniProtKB/Swiss-Prot;Acc:Q9D119]	67.2491	94.4338	104.803	115.889	110.725	114.81	181.847	156.948	153.508	228.403
ENSMUSG00000021384	2.84491	2.72282e-05	0.000644628	up	13:-:49230690-49248706	13:-:49230690-49248706	ENSMUSG00000021384	66329	Q9D176	Susd3	Sushi domain-containing protein 3 [Source:UniProtKB/Swiss-Prot;Acc:Q9D176]	3.23992	3.67647	2.59092	1.22265	1.7389	1.51571	0.14654	0.31117	0.17771	0.22105
ENSMUSG00000031443	5.93444	1.64771e-05	0.000460887	up	8:+:13026034-13035809	8:+:13026034-13035809	ENSMUSG00000031443	14068	Q542C2	F7	Coagulation factor VII Factor VII light chain Factor VII heavy chain [Source:UniProtKB/Swiss-Prot;Acc:P70375]	2.48586	4.73907	4.67794	0.72562	1.65048	1.2976	0.02795	0	0	0.03373
ENSMUSG00000030720	1.0478	2.67576e-05	0.000638009	up	7:-:126571207-126585817	7:-:126571207-126585817	ENSMUSG00000030720	12752	Q61124	Cln3	Battenin [Source:UniProtKB/Swiss-Prot;Acc:Q61124]	3.74216	4.19523	3.29511	2.51116	2.58088	2.5399	0.88992	1.26529	0.97023	1.30178
ENSMUSG00000113629	-2.41309981710451	2.12378e-05	0.000545111	down	12:-:15842758-15850625	12:-:15842758-15850625	ENSMUSG00000113629	-	-	Gm48558	predicted gene, 48558 [Source:MGI Symbol;Acc:MGI:6098113]	0.10332	0.20603	0.26329	0.32673	0.73442	0.42677	1.05729	1.15466	0.96167	1.53114
ENSMUSG00000026043	1.21785	1.49681e-05	0.000427663	up	1:+:45311538-45349706	1:+:45311538-45349706	ENSMUSG00000026043	12825	P08121	Col3a1	Collagen alpha-1(III) chain [Source:UniProtKB/Swiss-Prot;Acc:P08121]	1325.81	1456.32	1123.43	1316.32	1304.28	1400.17	637.604	912.651	687.729	921.978
ENSMUSG00000028238	5.03565	2.81218e-05	0.000658333	up	4:-:19876841-19922605	4:-:19876841-19922605	ENSMUSG00000028238	242341	Q80SY3	Atp6v0d2	V-type proton ATPase subunit d 2 [Source:UniProtKB/Swiss-Prot;Acc:Q80SY3]	9.98451	13.5528	8.38587	5.36864	5.29404	8.51471	0.03827	2.85568	0.04641	0.18472
ENSMUSG00000019256	1.09169	2.67547e-05	0.000638009	up	12:-:35497974-35535038	12:-:35497974-35535038	ENSMUSG00000019256	11622	Q3U5D9	Ahr	aryl hydrocarbon receptor isoform 2 [Source:RefSeq peptide;Acc:NP_001300956]	3.66677	4.37883	4.48512	2.76199	2.93828	2.88449	1.11301	1.17663	0.98168	1.61794
ENSMUSG00000052776	2.5255	3.00492e-05	0.000691145	up	5:-:120896256-120907521	5:-:120896256-120907521	ENSMUSG00000052776	246730	P11928	Oas1a	2'-5'-oligoadenylate synthase 1A [Source:UniProtKB/Swiss-Prot;Acc:P11928]	3.12509	2.92778	2.71862	4.73666	4.56398	4.5624	0.33082	1.23773	0.16717	0.49904
ENSMUSG00000037493	-1.3521017925591	2.40326e-05	0.00059344	down	9:-:54544794-54560218	9:-:54544794-54560218	ENSMUSG00000037493	56506	Q544Z8	Cib2	Calcium and integrin-binding family member 2 [Source:UniProtKB/Swiss-Prot;Acc:Q9Z309]	8.32793	10.4231	6.53819	13.2234	14.1063	14.4914	23.2088	23.8059	21.0219	16.6739
ENSMUSG00000026915	-1.00426257979046	2.3503e-05	0.000583936	down	2:-:37483228-37703859	2:-:37483228-37703859	ENSMUSG00000026915	20744	Q91WM1	Strbp	spermatid perinuclear RNA binding protein [Source:MGI Symbol;Acc:MGI:104626]	0.90566	0.78058	1.17898	1.23528	1.27329	1.10705	1.62742	1.58523	1.78408	1.62712
ENSMUSG00000017400	2.17664	2.83012e-05	0.000660947	up	11:-:98036623-98053462	11:-:98036623-98053462	ENSMUSG00000017400	217154	Q8R1B0	Stac2	SH3 and cysteine-rich domain-containing protein 2 [Source:UniProtKB/Swiss-Prot;Acc:Q8R1B0]	1.58544	1.29039	0.82453	0.94131	1.36077	1.82094	0.13244	0.30132	0.16062	0.19979
ENSMUSG00000096727	1.31583	3.14552e-05	0.000713634	up	17:-:34181988-34187764	17:-:34181988-34187764	ENSMUSG00000096727	16912	P28076	Psmb9	proteasome (prosome, macropain) subunit, beta type 9 (large multifunctional peptidase 2) [Source:MGI Symbol;Acc:MGI:1346526]	2.59534	2.97508	2.1079	1.96618	3.28842	2.13543	0.68171	1.01677	0.43059	0.71986
ENSMUSG00000061859	1.75599	3.08641e-05	0.000704188	up	4:+:98395785-98719603	4:+:98395785-98719603	ENSMUSG00000061859	12695	Q63ZW7	Patj	Mus musculus PATJ, crumbs cell polarity complex component (Patj), transcript variant 5, mRNA. [Source:RefSeq mRNA;Acc:NM_001355177]	1.62989	1.12205	1.07198	0.66758	0.97005	1.29436	0.21841	0.15902	0.25525	0.30192
ENSMUSG00000029838	1.6457	2.20586e-05	0.000562291	up	6:-:36714929-36810220	6:-:36714929-36810220	ENSMUSG00000029838	19242	P63089	Ptn	pleiotrophin [Source:MGI Symbol;Acc:MGI:97804]	63.5782	49.1127	27.5178	35.0829	36.2582	46.8033	14.0624	18.9924	6.66381	8.43969
ENSMUSG00000061576	-1.00188999356615	3.07144e-05	0.00070341	down	5:+:26817203-27727505	5:+:26817203-27727505	ENSMUSG00000061576	13483	Q9Z218	Dpp6	Dipeptidyl aminopeptidase-like protein 6 [Source:UniProtKB/Swiss-Prot;Acc:Q9Z218]	0.51412	0.35266	0.46955	0.44221	0.43366	0.35676	0.49243	0.67413	0.49511	0.80252
ENSMUSG00000091275	-2.02815014048792	2.58408e-05	0.000625433	down	14:-:5939225-5961745	14:-:5939225-5961745	ENSMUSG00000091275	100041279	K7N721	Gm3248	predicted gene 3248	0.29654	0.12319	0.12595	0.31258	0.32203	0.12759	0.50575	0.67506	0.58268	0.61035
ENSMUSG00000026459	1.19885	2.02895e-05	0.000528695	up	1:+:134289989-134292548	1:+:134289989-134292548	ENSMUSG00000026459	17928	P12979	Myog	Myogenin [Source:UniProtKB/Swiss-Prot;Acc:P12979]	278.506	260.44	182.644	125.461	141.37	170.999	84.0839	82.628	57.3307	68.544
ENSMUSG00000027514	3.37971	2.92197e-05	0.000675932	up	2:-:173206612-173218923	2:-:173206612-173218923	ENSMUSG00000027514	58203	Q9QY24	Zbp1	Z-DNA binding protein 1 [Source:MGI Symbol;Acc:MGI:1927449]	1.55413	1.44908	1.39347	3.00331	3.69936	2.21409	0.1767	0.19655	0.07143	0.10662
ENSMUSG00000039013	2.33913	2.54253e-05	0.000617519	up	7:+:43351341-43359531	7:+:43351341-43359531	ENSMUSG00000039013	233186	Q920G3	Siglec5	Sialic acid-binding Ig-like lectin 5 [Source:UniProtKB/Swiss-Prot;Acc:Q920G3]	0.70987	0.79849	1.03898	0.73674	1.2938	1.24051	0.0745	0.22601	0.09035	0.15734
ENSMUSG00000002032	-1.27145669484136	2.82542e-05	0.000660654	down	9:-:44793769-44799307	9:-:44793769-44799307	ENSMUSG00000002032	71687	Q9DCF1	Tmem25	Mus musculus transmembrane protein 25 (Tmem25), transcript variant 5, mRNA. [Source:RefSeq mRNA;Acc:NM_001357386]	3.43083	1.81278	4.3029	3.4597	3.48383	2.97137	6.40675	6.96926	4.23807	5.34975
ENSMUSG00000049866	1.35041	2.6495e-05	0.00063549	up	1:-:88673125-88702221	1:-:88673125-88702221	ENSMUSG00000049866	320982	P61208	Arl4c	ADP-ribosylation factor-like protein 4C [Source:UniProtKB/Swiss-Prot;Acc:P61208]	10.7169	11.8282	8.67127	4.95911	6.92318	7.28543	2.84809	2.5604	2.26061	2.27238
ENSMUSG00000044317	-1.12620550325619	3.14709e-05	0.000713634	down	7:+:19212538-19224174	7:+:19212538-19224174	ENSMUSG00000044317	319197	Q8BUD0	Gpr4	G-protein coupled receptor 4 [Source:UniProtKB/Swiss-Prot;Acc:Q8BUD0]	1.6211	2.07306	1.45484	2.85289	1.89962	2.36543	2.63255	3.23819	3.14889	3.35108
ENSMUSG00000040010	1.06834	2.65726e-05	0.000635788	up	8:-:121881150-121907694	8:-:121881150-121907694	ENSMUSG00000040010	20539	Q9Z127	Slc7a5	solute carrier family 7 (cationic amino acid transporter, y+ system), member 5 [Source:MGI Symbol;Acc:MGI:1298205]	14.5993	12.9583	11.182	7.7608	8.38822	10.5785	3.32144	4.60854	3.9431	4.21132
ENSMUSG00000051627	-1.31316126339429	3.234e-05	0.000725198	down	13:-:23620629-23622558	13:-:23620629-23622558	ENSMUSG00000051627	50709	P43274	Hist1h1e	Histone H1.4 [Source:UniProtKB/Swiss-Prot;Acc:P43274]	2.13129	2.25613	3.40621	2.49616	3.36655	1.76611	4.98118	4.54142	5.12663	3.21689
ENSMUSG00000068748	-1.01300263636817	3.14401e-05	0.000713634	down	6:+:22875502-23052916	6:+:22875502-23052916	ENSMUSG00000068748	19283	B2RXS8	Ptprz1	protein tyrosine phosphatase, receptor type Z, polypeptide 1 [Source:MGI Symbol;Acc:MGI:97816]	0.42066	0.40164	0.45786	0.55013	0.44345	0.49697	0.5472	0.83663	0.74768	0.56352
ENSMUSG00000054944	2.82845	2.07309e-05	0.000536804	up	13:-:97733498-97747411	13:-:97733498-97747411	ENSMUSG00000054944	403201	Q8BSU9	5330416C01Rik	RIKEN cDNA 5330416C01 gene [Source:MGI Symbol;Acc:MGI:2685378]	0.60801	0.71642	0.39439	0.83898	0.52386	0.68493	0.02828	0.03432	0.08574	0.10239
ENSMUSG00000016256	1.37907	2.26651e-05	0.000571722	up	2:-:174427493-174439039	2:-:174427493-174439039	ENSMUSG00000016256	64138	Q9WUU7	Ctsz	cathepsin Z [Source:MGI Symbol;Acc:MGI:1891190]	153.088	181.972	124.542	84.8288	92.977	95.7454	40.0653	58.3749	27.3342	35.7304
ENSMUSG00000085277	-1.50457323983044	3.19545e-05	0.000720495	down	2:+:77314751-77317035	2:+:77314751-77317035	ENSMUSG00000085277	-	-	Gm13943	predicted gene 13943 [Source:MGI Symbol;Acc:MGI:3650360]	15.1015	9.89017	12.6768	23.9709	22.9772	18.805	38.3305	25.0022	39.6871	33.642
ENSMUSG00000034936	-1.20708949860217	3.21315e-05	0.000723293	down	11:+:101665541-101667832	11:+:101665541-101667832	ENSMUSG00000034936	80981	Q99PE9	Arl4d	ADP-ribosylation factor-like protein 4D [Source:UniProtKB/Swiss-Prot;Acc:Q99PE9]	4.48298	4.06666	3.74556	5.90288	3.52611	5.42612	8.15962	10.0837	4.69698	7.35132
ENSMUSG00000040061	2.33095	3.55459e-05	0.000776863	up	2:-:118707517-118728438	2:-:118707517-118728438	ENSMUSG00000040061	18796	A3KGF7	Plcb2	1-phosphatidylinositol 4,5-bisphosphate phosphodiesterase beta-2 [Source:UniProtKB/Swiss-Prot;Acc:A3KGF7]	1.37022	1.16659	1.43592	0.8179	1.65976	0.98568	0.11816	0.52571	0.06687	0.18062
ENSMUSG00000022372	2.1891	3.48085e-05	0.000763597	up	15:-:66780819-66831829	15:-:66780819-66831829	ENSMUSG00000022372	20491	Q4FJX0	Sla	src-like adaptor [Source:MGI Symbol;Acc:MGI:104295]	2.41032	2.72836	1.57782	1.17477	1.8076	1.27303	0.22063	0.67272	0.10977	0.34135
ENSMUSG00000026012	-2.38787175235831	3.232e-05	0.000725198	down	1:+:60716800-60773359	1:+:60716800-60773359	ENSMUSG00000026012	12487	P31041	Cd28	T-cell-specific surface glycoprotein CD28 [Source:UniProtKB/Swiss-Prot;Acc:P31041]	0.78804	0.5045	0.33821	0.76595	1.74923	0.96794	1.70616	3.53293	5.53833	2.21268
ENSMUSG00000022441	-1.44794970811207	3.47335e-05	0.000762522	down	15:-:83866712-84065379	15:-:83866712-84065379	ENSMUSG00000022441	77627	Q6P1E8	Efcab6	EF-hand calcium-binding domain-containing protein 6 [Source:UniProtKB/Swiss-Prot;Acc:Q6P1E8]	0.42002	0.45038	0.77549	0.53128	0.76047	0.53193	0.97314	0.80691	1.09167	1.64416
ENSMUSG00000049349	-1.65746746201638	3.59615e-05	0.000783608	down	3:-:138048761-138067388	3:-:138048761-138067388	ENSMUSG00000049349	329763	Q8C6Y9	Gm5105	predicted gene 5105	0.793	0.60819	1.21248	0.50153	0.75879	0.6614	1.77901	1.6285	1.85469	1.31829
ENSMUSG00000083854	-1.10330952509594	3.65368e-05	0.000790754	down	7:-:103882654-103883004	7:-:103882654-103883004	ENSMUSG00000083854	100503724	Q9CQV7	Dnajc19-ps	DnaJ heat shock protein family (Hsp40) member C19, pseudogene [Source:MGI Symbol;Acc:MGI:3709029]	7.234	7.06825	6.34142	7.50318	6.68462	7.02186	12.1402	10.5993	9.15699	9.82684
ENSMUSG00000102252	-1.14528041312393	3.4661e-05	0.000762073	down	7:-:59982495-60140219	7:-:59982495-60140219	ENSMUSG00000102252	20646	P63163	Snrpn	small nuclear ribonucleoprotein N [Source:MGI Symbol;Acc:MGI:98347]	1.92875	1.75886	1.6783	1.84462	3.00947	2.67178	3.70669	3.12511	2.77307	3.39853
ENSMUSG00000071715	1.92919	3.59978e-05	0.000783815	up	15:+:78244801-78262580	15:+:78244801-78262580	ENSMUSG00000071715	17972	P97369	Ncf4	Neutrophil cytosol factor 4 [Source:UniProtKB/Swiss-Prot;Acc:P97369]	7.69282	10.3269	8.32832	4.1021	6.25442	4.25749	1.13193	1.99785	0.93596	0.96243
ENSMUSG00000021418	-1.07323081424044	3.44778e-05	0.000759186	down	13:-:35893472-35906359	13:-:35893472-35906359	ENSMUSG00000021418	208366	Q8R1F9	Rpp40	Ribonuclease P protein subunit p40 [Source:UniProtKB/Swiss-Prot;Acc:Q8R1F9]	0.86191	0.65806	0.57779	0.74646	0.99349	0.71363	1.16804	0.94489	1.01182	1.34248
ENSMUSG00000050708	1.73288	2.25524e-05	0.000570355	up	7:-:45457944-45459884	7:-:45457944-45459884	ENSMUSG00000050708	14325	Q9CPX4	Ftl1	ferritin light polypeptide 1	333.877	495.435	289.877	148.41	184.795	178.217	65.4227	84.28	53.0981	70.6693
ENSMUSG00000074622	1.28256	2.5138e-05	0.000611962	up	2:-:160363703-160367065	2:-:160363703-160367065	ENSMUSG00000074622	16658	P54841	Mafb	Transcription factor MafB [Source:UniProtKB/Swiss-Prot;Acc:P54841]	41.1788	42.2157	31.0767	23.3597	26.6013	29.206	11.5274	17.6252	7.68328	8.35429
ENSMUSG00000057719	-1.50751233574503	3.19215e-05	0.000720495	down	18:+:42053667-42158960	18:+:42053667-42158960	ENSMUSG00000057719	269016	Q8BZT2	Sh3rf2	Putative E3 ubiquitin-protein ligase SH3RF2 [Source:UniProtKB/Swiss-Prot;Acc:Q8BZT2]	1.61716	0.87773	2.79936	1.18617	1.42837	1.18575	3.4076	2.53084	3.26568	2.80064
ENSMUSG00000031382	-1.3201096755049	2.80909e-05	0.000658135	down	X:+:164436994-164459170	X:+:164436994-164459170	ENSMUSG00000031382	68854	Q9CQ31	Asb11	Ankyrin repeat and SOCS box protein 11 [Source:UniProtKB/Swiss-Prot;Acc:Q9CQ31]	4.33445	3.69912	6.05455	9.04743	7.03681	7.23879	11.2255	11.6502	10.6475	12.3576
ENSMUSG00000020811	-1.18997360878421	3.49409e-05	0.000764783	down	11:+:71749920-71789647	11:+:71749920-71789647	ENSMUSG00000020811	216881	Q80XH4	Wscd1	WSC domain containing 1 [Source:MGI Symbol;Acc:MGI:2448493]	1.5281	1.46451	1.79911	1.16872	0.88411	0.95412	2.37586	2.26517	1.85228	1.75544
ENSMUSG00000022490	-1.48330707898297	3.01946e-05	0.000693009	down	15:-:103530279-103538003	15:-:103530279-103538003	ENSMUSG00000022490	58200	Q9ERT9	Ppp1r1a	protein phosphatase 1, regulatory (inhibitor) subunit 1A	5.1327	9.53707	14.7047	8.26294	10.4108	8.59274	19.9348	17.5749	13.4633	28.7155
ENSMUSG00000115230	4.35916	2.00395e-05	0.000524608	up	15:+:39962649-39967024	15:+:39962649-39967024	ENSMUSG00000115230	-	-	AC101945.2	-	1.54893	1.47078	0.86461	0.27989	0.56797	0.57124	0	0	0.09153	0
ENSMUSG00000044231	-1.18099540437428	3.66405e-05	0.000791921	down	13:-:47012557-47014850	13:-:47012557-47014850	ENSMUSG00000044231	105193	Q8BR37	Nhlrc1	NHL repeat containing 1	1.99234	1.545	1.64723	1.40005	1.70466	2.49169	3.53386	2.7213	2.25273	2.8158
ENSMUSG00000083836	-1.26929476195496	3.651e-05	0.000790754	down	4:-:119334389-119335445	4:-:119334389-119335445	ENSMUSG00000083836	16830	-	Ldha-ps2	lactate dehydrogenase A, pseudogene 2 [Source:MGI Symbol;Acc:MGI:96761]	3.79549	3.06569	3.96675	4.19317	4.09804	4.5643	5.55548	6.32361	9.83781	5.93313
ENSMUSG00000024511	1.43511	3.77147e-05	0.000810354	up	18:-:69979131-70141605	18:-:69979131-70141605	ENSMUSG00000024511	80718	Q99P58	Rab27b	RAB27B, member RAS oncogene family [Source:MGI Symbol;Acc:MGI:1931295]	1.2364	1.06204	0.92098	0.85413	0.78871	1.18344	0.18005	0.35429	0.15934	0.42282
ENSMUSG00000017417	-1.00362667463301	3.23883e-05	0.000725727	down	11:-:97923238-97986444	11:-:97923238-97986444	ENSMUSG00000017417	72324	Q91ZV7	Plxdc1	Plexin domain-containing protein 1 [Source:UniProtKB/Swiss-Prot;Acc:Q91ZV7]	1.80617	1.65422	1.90528	2.5901	2.13974	2.51572	2.50373	3.7683	2.89305	3.2809
ENSMUSG00000039883	1.12591	2.75784e-05	0.00064976	up	5:+:21543559-21575904	5:+:21543559-21575904	ENSMUSG00000039883	74511	Q9CXD9	Lrrc17	Leucine-rich repeat-containing protein 17 [Source:UniProtKB/Swiss-Prot;Acc:Q9CXD9]	26.2781	32.1079	19.0527	15.5245	20.2428	19.3742	6.8126	10.8707	6.84714	8.18678
ENSMUSG00000056880	-1.15550617354845	3.08741e-05	0.000704188	down	9:+:115909455-116076176	9:+:115909455-116076176	ENSMUSG00000056880	73748	E9QP13	Gadl1	glutamate decarboxylase like 1 [Source:HGNC Symbol;Acc:HGNC:27949]	3.54685	2.65542	4.24186	3.20687	5.53681	3.42459	6.0011	5.5648	5.35509	8.53885
ENSMUSG00000041731	1.18603	2.76757e-05	0.000650953	up	19:-:24683016-24861855	19:-:24683016-24861855	ENSMUSG00000041731	226041	Q8BZF8	Pgm5	Phosphoglucomutase-like protein 5 [Source:UniProtKB/Swiss-Prot;Acc:Q8BZF8]	37.2678	20.9902	18.7215	18.1266	20.3926	27.2728	8.77851	8.39946	7.8188	8.11051
ENSMUSG00000031700	-1.18657858082108	2.63858e-05	0.000634792	down	8:+:85492576-85527560	8:+:85492576-85527560	ENSMUSG00000031700	108682	Q8BGT5	Gpt2	glutamic pyruvate transaminase (alanine aminotransferase) 2 [Source:MGI Symbol;Acc:MGI:1915391]	7.47836	6.19999	5.8616	10.2447	11.0451	11.3095	15.6644	16.4934	16.9532	14.6142
ENSMUSG00000036446	1.0607	2.32745e-05	0.000581088	up	10:+:97565128-97572703	10:+:97565128-97572703	ENSMUSG00000036446	17022	P51885	Lum	lumican	179.689	187.077	123.827	187.639	184.319	185.039	63.9384	122.972	62.1463	70.0143
ENSMUSG00000040751	2.47896	4.03931e-05	0.000849213	up	5:-:134600022-134615025	5:-:134600022-134615025	ENSMUSG00000040751	56743	Q9JHL0	Lat2	Linker for activation of T-cells family member 2 [Source:UniProtKB/Swiss-Prot;Acc:Q9JHL0]	4.04944	6.83847	3.93017	2.98993	2.479	1.94073	0.31723	0.52928	0.31258	0.59818
ENSMUSG00000031022	4.49492	2.08438e-05	0.00053925	up	7:-:109712181-109723850	7:-:109712181-109723850	ENSMUSG00000031022	57355	Q3UQ01	BC051019	Uncharacterized [Source:UniProtKB/Swiss-Prot;Acc:Q9JJR6]	1.37383	1.24745	0.72519	0.34134	0.78472	1.31733	0.05021	0	0.06089	0
ENSMUSG00000025473	3.55851	3.94313e-05	0.000837407	up	7:-:139978932-139992562	7:-:139978932-139992562	ENSMUSG00000025473	11501	Q3U1J7	Adam8	Disintegrin and metalloproteinase domain-containing protein 8 [Source:UniProtKB/Swiss-Prot;Acc:Q05910]	11.3653	18.9514	12.9242	4.55652	5.44801	4.89574	0.30252	0.76136	0.43482	0.77073
ENSMUSG00000024617	-1.07096884241168	2.3389e-05	0.000582141	down	18:+:60925618-60988152	18:+:60925618-60988152	ENSMUSG00000024617	12322	P11798	Camk2a	Calcium/calmodulin-dependent protein kinase type II subunit alpha [Source:UniProtKB/Swiss-Prot;Acc:P11798]	24.66	17.4854	26.7174	33.2746	34.0821	30.4242	54.4232	47.996	56.9094	53.7409
ENSMUSG00000031165	1.77713	3.98356e-05	0.000840509	up	X:-:8081453-8090498	X:-:8081453-8090498	ENSMUSG00000031165	22376	Q53WY0	Was	Wiskott-Aldrich syndrome [Source:MGI Symbol;Acc:MGI:105059]	6.65443	8.8462	6.80472	3.96576	5.0282	3.96437	0.85118	2.25109	0.68818	1.36963
ENSMUSG00000026429	-1.24674171222078	3.96298e-05	0.000839189	down	1:+:134962565-134974162	1:+:134962565-134974162	ENSMUSG00000026429	67196	Q9CQ37	Ube2t	ubiquitin-conjugating enzyme E2T [Source:MGI Symbol;Acc:MGI:1914446]	1.02909	0.86899	1.1239	0.63756	0.74642	0.50965	1.54737	1.52557	1.1077	1.12821
ENSMUSG00000002668	1.65397	4.08752e-05	0.000855661	up	17:-:57066056-57078510	17:-:57066056-57078510	ENSMUSG00000002668	70785	Q8CFK6	Dennd1c	DENN/MADD domain containing 1C	3.99007	4.07867	4.72446	2.88036	5.77742	3.57923	0.55678	1.72656	0.5752	1.24431
ENSMUSG00000002076	1.76188	4.01703e-05	0.00084635	up	17:-:31944769-32034508	17:-:31944769-32034508	ENSMUSG00000002076	74377	Q9D4G2	Hsf2bp	Heat shock factor 2-binding protein [Source:UniProtKB/Swiss-Prot;Acc:Q9D4G2]	1.17861	1.56681	1.46255	0.84263	1.25463	1.58748	0.19227	0.40299	0.21198	0.27422
ENSMUSG00000009687	1.77388	3.39993e-05	0.000750907	up	7:-:31032722-31042481	7:-:31032722-31042481	ENSMUSG00000009687	18301	Q3TDW1	Fxyd5	FXYD domain-containing ion transport regulator 5 [Source:UniProtKB/Swiss-Prot;Acc:P97808]	11.9204	17.151	12.1259	5.99134	7.90769	7.25551	1.72311	3.36946	1.54848	2.55819
ENSMUSG00000025791	-1.02246742133485	2.33127e-05	0.000581546	down	4:+:99929414-99987294	4:+:99929414-99987294	ENSMUSG00000025791	72157	Q9D0F9	Pgm2	Phosphoglucomutase-1 [Source:UniProtKB/Swiss-Prot;Acc:Q9D0F9]	115.978	98.5594	128.922	161.851	174.347	169.42	264.206	249.12	291.203	237.928
ENSMUSG00000033685	1.1697	2.65576e-05	0.000635788	up	7:+:100493337-100502020	7:+:100493337-100502020	ENSMUSG00000033685	22228	Q549J5	Ucp2	uncoupling protein 2 (mitochondrial, proton carrier) [Source:MGI Symbol;Acc:MGI:109354]	41.1551	45.6403	36.4471	23.8042	28.4754	24.798	11.1679	18.1259	9.45911	13.9173
ENSMUSG00000009487	2.88829	4.04277e-05	0.000849331	up	7:+:46240987-46311434	7:+:46240987-46311434	ENSMUSG00000009487	18419	G3UWC8	Otog	otogelin [Source:HGNC Symbol;Acc:HGNC:8516]	1.06973	0.79257	0.5652	0.37862	0.48831	0.35977	0.03515	0.06702	0.02436	0.11514
ENSMUSG00000023947	1.07978	4.1508e-05	0.000865092	up	17:+:45555716-45563169	17:+:45555716-45563169	ENSMUSG00000023947	18037	O54910	Nfkbie	nuclear factor of kappa light polypeptide gene enhancer in B cells inhibitor, epsilon	4.54989	5.72795	3.99662	3.52733	5.88699	4.13543	1.28735	1.74435	1.30102	1.73484
ENSMUSG00000037139	1.18383	2.86476e-05	0.000666912	up	4:+:135759715-135815564	4:+:135759715-135815564	ENSMUSG00000037139	242702	A2ABU4	Myom3	Myomesin-3 [Source:UniProtKB/Swiss-Prot;Acc:A2ABU4]	30.6311	21.7269	29.5854	17.3618	17.1677	19.7496	8.80442	7.91608	5.75106	11.2589
ENSMUSG00000035208	2.74896	4.53494e-05	0.000918466	up	11:-:83002158-83020810	11:-:83002158-83020810	ENSMUSG00000035208	276950	E9Q0R4	Slfn8	schlafen 8 [Source:MGI Symbol;Acc:MGI:2672859]	2.8054	1.70794	1.6449	3.72124	4.17646	3.44813	0.21594	0.47782	0.15405	0.38324
ENSMUSG00000074785	1.04415	3.79544e-05	0.000813714	up	10:-:94790866-94944835	10:-:94790866-94944835	ENSMUSG00000074785	54712	Q9CRY9	Plxnc1	Plexin-C1 [Source:UniProtKB/Swiss-Prot;Acc:Q9QZC2]	2.69454	2.59557	1.8848	2.32349	3.15616	3.03371	0.80915	1.16311	0.90581	0.82626
ENSMUSG00000020866	1.08477	3.57824e-05	0.000780867	up	11:-:94408391-94474198	11:-:94408391-94474198	ENSMUSG00000020866	12291	E9PWL1	Cacna1g	calcium channel, voltage-dependent, T type, alpha 1G subunit [Source:MGI Symbol;Acc:MGI:1201678]	4.07784	3.83097	3.73789	2.83881	2.43922	2.64346	1.31747	1.5489	0.75847	1.10121
ENSMUSG00000041642	1.63189	4.16292e-05	0.00086582	up	1:+:136131389-136177998	1:+:136131389-136177998	ENSMUSG00000041642	16565	Q9QXL1	Kif21b	kinesin family member 21B [Source:HGNC Symbol;Acc:HGNC:29442]	1.62134	1.35888	1.80986	1.30219	2.55282	1.15777	0.29429	0.69868	0.21207	0.38604
ENSMUSG00000034591	1.20927	4.40857e-05	0.000903571	up	10:-:83230848-83337882	10:-:83230848-83337882	ENSMUSG00000034591	338365	B2RQZ3	Slc41a2	solute carrier family 41, member 2 [Source:MGI Symbol;Acc:MGI:2442940]	2.76271	2.91542	2.40964	1.66921	2.06949	1.99014	0.43718	0.94309	0.61266	0.90277
ENSMUSG00000018451	1.92421	4.71516e-05	0.000938764	up	11:-:71031941-71033513	11:-:71031941-71033513	ENSMUSG00000018451	103712	Q8VBZ2	6330403K07Rik	RIKEN cDNA 6330403K07 gene [Source:MGI Symbol;Acc:MGI:1918001]	11.387	7.45581	5.3704	6.27727	4.79199	7.33596	2.01742	1.224	0.97021	0.96546
ENSMUSG00000030798	1.70438	4.12207e-05	0.000861663	up	7:-:45233632-45239115	7:-:45233632-45239115	ENSMUSG00000030798	12493	Q4FK35	Cd37	Leukocyte antigen CD37 [Source:UniProtKB/Swiss-Prot;Acc:Q61470]	8.29075	9.57432	6.99589	4.57776	10.3173	4.54121	1.31316	2.48862	0.89469	2.0299
ENSMUSG00000039601	-1.03871075552393	3.57011e-05	0.000779674	down	17:+:43801351-44039516	17:+:43801351-44039516	ENSMUSG00000039601	53901	Q543P2	Rcan2	regulator of calcineurin 2	3.3104	2.82574	5.54103	3.96691	3.67409	4.24604	5.56268	7.58647	5.31907	6.11066
ENSMUSG00000073492	3.96577	2.43261e-05	0.000597426	up	1:+:171895664-171898237	1:+:171895664-171898237	ENSMUSG00000073492	100038548	E9PZK0,Q3UP30	Gm10521	predicted gene 10521	1.14429	0.94418	1.52838	0.94829	0.98166	1.01864	0.02019	0.26947	0	0.07309
ENSMUSG00000042817	3.10666	3.33284e-05	0.000741685	up	5:-:147330741-147400489	5:-:147330741-147400489	ENSMUSG00000042817	14255	Q00342	Flt3	fms related tyrosine kinase 3 [Source:HGNC Symbol;Acc:HGNC:3765]	0.47691	0.51648	0.5867	0.26002	0.84748	0.40756	0.0589	0.06126	0.02041	0.02031
ENSMUSG00000035279	1.02479	3.01714e-05	0.000693009	up	7:+:4925785-4944826	7:+:4925785-4944826	ENSMUSG00000035279	269855	Q8BV57	Ssc5d	Soluble scavenger receptor cysteine-rich domain-containing protein SSC5D [Source:UniProtKB/Swiss-Prot;Acc:Q8BV57]	53.3937	45.9767	42.6402	35.6579	31.8764	30.8241	22.2582	19.2468	13.3595	13.9636
ENSMUSG00000036067	3.1329	4.68932e-05	0.000937833	up	2:-:27021363-27027998	2:-:27021363-27027998	ENSMUSG00000036067	227659	A2AR26	Slc2a6	solute carrier family 2 (facilitated glucose transporter), member 6 [Source:MGI Symbol;Acc:MGI:2443286]	4.45989	3.23249	2.27302	1.10025	1.79866	2.33538	0.0971	0.23565	0.15701	0.31249
ENSMUSG00000024965	2.18719	4.18774e-05	0.000867129	up	19:-:6998958-7019469	19:-:6998958-7019469	ENSMUSG00000024965	108101	Q8K1B8	Fermt3	fermitin family member 3	19.5122	23.4468	18.4084	8.02	14.116	9.08119	1.4262	5.06992	1.48601	2.86051
ENSMUSG00000032946	-1.03181443707054	3.58641e-05	0.000782067	down	19:+:6399340-6415216	19:+:6399340-6415216	ENSMUSG00000032946	19395	Q9QUG9	Rasgrp2	RAS, guanyl releasing protein 2 [Source:MGI Symbol;Acc:MGI:1333849]	1.53775	1.25108	1.49222	1.93471	2.48244	1.85047	2.50094	2.93798	2.33074	3.21567
ENSMUSG00000020695	1.38429	3.07439e-05	0.00070341	up	11:+:105292643-105351139	11:+:105292643-105351139	ENSMUSG00000020695	17534	Q64449	Mrc2	C-type mannose receptor 2 [Source:UniProtKB/Swiss-Prot;Acc:Q64449]	50.3413	45.8447	35.4062	22.9547	22.4907	26.8799	11.1266	14.9659	8.00754	10.1766
ENSMUSG00000021253	1.08574	3.2625e-05	0.000729912	up	12:-:86056745-86079041	12:-:86056745-86079041	ENSMUSG00000021253	21809	Q3TRQ9	Tgfb3	transforming growth factor, beta 3	48.0356	44.9894	35.1467	25.1773	25.3593	34.6292	12.9646	14.4828	12.2206	15.7015
ENSMUSG00000051498	1.18165	5.04647e-05	0.000984616	up	5:-:64952031-64960097	5:-:64952031-64960097	ENSMUSG00000051498	21899	Q3UV88	Tlr6	toll-like receptor 6 [Source:MGI Symbol;Acc:MGI:1341296]	2.2891	2.02418	1.56944	1.39603	1.77563	1.44924	0.41829	0.54141	0.49037	0.67307
ENSMUSG00000100410	-1.1747526490487	4.89028e-05	0.000963774	down	13:-:99076526-99087921	13:-:99076526-99087921	ENSMUSG00000100410	69603	-	2310020H05Rik	RIKEN cDNA 2310020H05 gene	5.1488	3.65674	3.73849	5.5313	5.18058	7.64747	6.92878	9.2834	6.65228	8.88436
ENSMUSG00000104784	-1.39142032747055	5.05669e-05	0.000985297	down	5:+:44226587-44243548	5:+:44226587-44243548	ENSMUSG00000104784	-	-	Gm42984	predicted gene 42984 [Source:MGI Symbol;Acc:MGI:5663121]	1.13193	1.33376	1.10135	0.97621	1.40194	1.16887	2.68517	2.0444	1.66014	2.35095
ENSMUSG00000030047	1.03836	4.47275e-05	0.000911303	up	6:-:87458545-87533259	6:-:87458545-87533259	ENSMUSG00000030047	232201	Q8BYW1	Arhgap25	Rho GTPase-activating protein 25 [Source:UniProtKB/Swiss-Prot;Acc:Q8BYW1]	4.00855	5.02435	4.37785	2.94082	3.32422	3.07496	1.33606	1.82032	0.9665	1.2305
ENSMUSG00000041827	2.93117	4.18967e-05	0.000867129	up	5:+:114923240-114937915	5:+:114923240-114937915	ENSMUSG00000041827	231655	Q8VI94	Oasl1	2'-5'-oligoadenylate synthase-like protein 1 [Source:UniProtKB/Swiss-Prot;Acc:Q8VI94]	1.20726	0.91246	1.23058	2.53687	2.07613	1.42762	0.09963	0.16925	0.04833	0.28856
ENSMUSG00000049719	3.76335	2.7228e-05	0.000644628	up	9:+:110844506-110856522	9:+:110844506-110856522	ENSMUSG00000049719	74306	Q5M8S2	Prss46	Serine protease 46 [Source:UniProtKB/Swiss-Prot;Acc:Q5M8S2]	0.49047	0.94041	0.76915	0.19089	0.58106	0.1948	0	0.04685	0	0
ENSMUSG00000078963	-1.73260107963052	4.6097e-05	0.000927833	down	18:-:80229758-80247102	18:-:80229758-80247102	ENSMUSG00000078963	66255	B2RXB2	Hsbp1l1	heat shock factor binding protein 1-like 1	0.28416	0.36426	0.45516	0.56481	0.529	0.50302	0.78925	1.05851	1.3098	1.153
ENSMUSG00000106840	-1.64897530412467	5.27663e-05	0.00101799	down	5:-:129875979-129876947	5:-:129875979-129876947	ENSMUSG00000106840	-	-	Gm42790	predicted gene 42790 [Source:MGI Symbol;Acc:MGI:5662927]	1.57222	0.78377	1.12181	2.18755	2.66971	1.35294	3.00319	2.66805	3.31693	4.01261
ENSMUSG00000031637	-1.55527077356093	4.73105e-05	0.000939984	down	8:+:45999303-46029477	8:+:45999303-46029477	ENSMUSG00000031637	67620	Q9D4C6	Lrp2bp	LRP2-binding protein [Source:UniProtKB/Swiss-Prot;Acc:Q9D4C6]	1.00676	0.57191	0.85915	1.58439	1.74743	1.74074	1.89272	2.5438	2.84745	2.66003
ENSMUSG00000098112	2.80098	5.30652e-05	0.00102241	up	15:-:100641077-100669553	15:-:100641077-100669553	ENSMUSG00000098112	668218	S4R270	Bin2	bridging integrator 2 [Source:HGNC Symbol;Acc:HGNC:1053]	6.56361	8.66543	6.9973	3.55448	6.06371	3.46144	0.34918	1.94405	0.17437	0.89236
ENSMUSG00000025804	2.72493	5.04162e-05	0.000984616	up	9:-:123962124-123968692	9:-:123962124-123968692	ENSMUSG00000025804	12768	Q8BMH9	Ccr1	C-C chemokine receptor type 1 [Source:UniProtKB/Swiss-Prot;Acc:P51675]	9.14195	21.0712	14.1606	6.18991	6.43451	5.88629	0.89881	1.86968	0.66737	0.97401
ENSMUSG00000026321	2.03641	5.15524e-05	0.000999181	up	1:+:105780718-105847981	1:+:105780718-105847981	ENSMUSG00000026321	21934	O35305	Tnfrsf11a	Tumor necrosis factor receptor superfamily member 11A [Source:UniProtKB/Swiss-Prot;Acc:O35305]	3.394	4.09453	3.39902	1.81381	2.01041	1.48076	0.36467	0.73751	0.38961	0.35627
ENSMUSG00000050022	1.72143	5.43074e-05	0.00104223	up	5:+:140724127-140761439	5:+:140724127-140761439	ENSMUSG00000050022	231842	A1L312	Amz1	Archaemetzincin-1 [Source:UniProtKB/Swiss-Prot;Acc:Q8BVF9]	1.16018	1.3155	1.15168	0.74814	0.77257	0.61077	0.24055	0.23539	0.14116	0.16856
ENSMUSG00000115819	-1.33910654858088	5.46624e-05	0.00104562	down	15:-:103586944-103588368	15:-:103586944-103588368	ENSMUSG00000115819	-	-	AC108858.2	-	1.42548	0.81721	1.52567	1.48754	0.97103	1.61919	1.7869	2.78779	2.07861	2.42051
ENSMUSG00000112290	3.49565	2.75812e-05	0.00064976	up	10:+:96310131-96362367	10:+:96310131-96362367	ENSMUSG00000112290	102636813	-	Gm33782	predicted gene, 33782 [Source:MGI Symbol;Acc:MGI:5592941]	2.55387	0.5876	0.60074	0.74547	0.6982	1.3186	0.10051	0	0	0
ENSMUSG00000050777	1.26439	4.84411e-05	0.00095894	up	1:-:120067377-120074074	1:-:120067377-120074074	ENSMUSG00000050777	170706	Q9JJV3	Tmem37	transmembrane protein 37 [Source:MGI Symbol;Acc:MGI:2157899]	18.1284	17.4952	11.6873	9.16236	10.1875	13.1999	4.32058	3.60738	3.41307	4.16174
ENSMUSG00000089829	-2.18699297194518	4.75184e-05	0.000943416	down	1:+:165781075-165789367	1:+:165781075-165789367	ENSMUSG00000089829	-	-	Gm16565	predicted gene 16565 [Source:MGI Symbol;Acc:MGI:4414985]	0.11642	0.09286	0.21361	0.41233	0.16551	0.26448	0.83393	0.57824	0.43344	0.6901
ENSMUSG00000058966	-1.66306323496247	5.04488e-05	0.000984616	down	7:+:126797668-126830219	7:+:126797668-126830219	ENSMUSG00000058966	68952	Q7TNV1	Fam57b	Protein FAM57B [Source:UniProtKB/Swiss-Prot;Acc:Q7TNV1]	1.10986	0.55328	0.96029	2.51388	1.97226	1.3593	2.44312	2.94854	3.01094	3.09183
ENSMUSG00000087408	-1.11844123378629	4.659e-05	0.000933265	down	8:+:70315775-70331592	8:+:70315775-70331592	ENSMUSG00000087408	93898	A2RT05	Cers1	Ceramide synthase 1 [Source:UniProtKB/Swiss-Prot;Acc:P27545]	2.80257	1.91606	3.15055	2.85622	3.90832	3.30746	5.30966	4.45436	4.84935	4.13341
ENSMUSG00000034055	-1.37727855549521	3.31623e-05	0.00073911	down	X:-:102513975-102644246	X:-:102513975-102644246	ENSMUSG00000034055	18679	P18826	Phka1	Phosphorylase b kinase regulatory subunit alpha, skeletal muscle isoform [Source:UniProtKB/Swiss-Prot;Acc:P18826]	13.7524	9.89338	13.555	21.3568	20.8004	23.1576	31.8321	41.4672	49.499	34.0368
ENSMUSG00000005958	1.27051	4.44064e-05	0.000906171	up	16:+:21204755-21223305	16:+:21204755-21223305	ENSMUSG00000005958	13845	P54754	Ephb3	Ephrin type-B receptor 3 [Source:UniProtKB/Swiss-Prot;Acc:P54754]	8.01024	7.10084	5.24304	4.24894	3.60644	4.86125	1.62781	1.72457	1.33278	2.11404
ENSMUSG00000021728	2.18854	5.06679e-05	0.000985954	up	13:+:117208536-117274415	13:+:117208536-117274415	ENSMUSG00000021728	13723	P21995	Emb	Embigin [Source:UniProtKB/Swiss-Prot;Acc:P21995]	4.8459	7.30223	4.4673	2.35322	2.91835	3.15884	0.74495	1.26918	0.27377	0.56302
ENSMUSG00000022876	2.26032	5.60591e-05	0.00106815	up	16:-:75858793-76022281	16:-:75858793-76022281	ENSMUSG00000022876	67742	P57725	Samsn1	SAM domain-containing protein SAMSN-1 [Source:UniProtKB/Swiss-Prot;Acc:P57725]	0.76148	1.08753	1.11184	0.98922	1.75547	0.94572	0.12636	0.30666	0.05108	0.25416
ENSMUSG00000048779	1.56839	4.69781e-05	0.000937833	up	7:-:100937630-100974649	7:-:100937630-100974649	ENSMUSG00000048779	233571	Q9ERK9	P2ry6	P2Y purinoceptor 6 [Source:UniProtKB/Swiss-Prot;Acc:Q9ERK9]	13.562	17.5203	9.73595	5.91839	8.83564	9.57249	2.35799	3.21074	2.79417	2.17226
ENSMUSG00000097245	-1.17526240848211	4.87646e-05	0.000961696	down	10:+:22343439-22345792	10:+:22343439-22345792	ENSMUSG00000097245	432438	-	Gm5421	predicted gene 5421 [Source:MGI Symbol;Acc:MGI:3645718]	3.12807	2.32295	3.1885	3.11076	3.24576	4.56676	4.39304	5.33065	6.85367	4.90196
ENSMUSG00000016283	4.0474	3.30725e-05	0.000737671	up	17:-:37480851-37483552	17:-:37480851-37483552	ENSMUSG00000016283	14990	Q6W9J6	H2-M2	Mus musculus histocompatibility 2, M region locus 2 (H2-M2), transcript variant 2, mRNA. [Source:RefSeq mRNA;Acc:NM_001347387]	0.29468	0.2938	0.16687	0.86971	1.51277	0.67621	0	0.04066	0	0
ENSMUSG00000022012	1.15725	5.62297e-05	0.0010689	up	14:+:77156763-77721760	14:+:77156763-77721760	ENSMUSG00000022012	239188	Q8BHR2	Enox1	ecto-NOX disulfide-thiol exchanger 1	1.33303	1.1065	1.03371	0.83097	1.04274	1.04063	0.31328	0.53854	0.22954	0.29143
ENSMUSG00000027983	-1.52542676184118	5.87174e-05	0.00109181	down	3:-:131288441-131303227	3:-:131288441-131303227	ENSMUSG00000027983	71519	Q9CX98	Cyp2u1	Cytochrome P450 2U1 [Source:UniProtKB/Swiss-Prot;Acc:Q9CX98]	0.36813	0.26079	0.24687	0.3186	0.25249	0.5202	0.6642	0.54131	0.76944	0.61014
ENSMUSG00000112329	-1.4582783276272	4.90688e-05	0.000965096	down	10:-:33477115-33477472	10:-:33477115-33477472	ENSMUSG00000112329	-	-	Gm47908	predicted gene, 47908 [Source:MGI Symbol;Acc:MGI:6097152]	17.5895	10.8901	19.3752	23.5048	29.5766	28.1242	39.7728	32.4092	44.0095	51.677
ENSMUSG00000040907	3.33468	5.64951e-05	0.00107088	up	7:-:24978167-25005958	7:-:24978167-25005958	ENSMUSG00000040907	232975	Q6PIC6	Atp1a3	Sodium/potassium-transporting ATPase subunit alpha-3 [Source:UniProtKB/Swiss-Prot;Acc:Q6PIC6]	2.00301	2.6939	2.02433	0.87328	1.19152	0.95057	0.0785	0.38101	0.04231	0.08421
ENSMUSG00000107758	3.27986	2.71007e-05	0.000643692	up	6:+:49071630-49071936	6:+:49071630-49071936	ENSMUSG00000107758	100462958	-	Gm19253	predicted gene, 19253 [Source:MGI Symbol;Acc:MGI:5011438]	0.82708	3.29849	1.01167	0.41847	0.5879	0.85407	0	0	0	0
ENSMUSG00000034685	1.31438	4.25793e-05	0.000878154	up	11:-:102436981-102447682	11:-:102436981-102447682	ENSMUSG00000034685	217219	A2A699	Fam171a2	Protein FAM171A2 [Source:UniProtKB/Swiss-Prot;Acc:A2A699]	26.7183	19.6261	12.6131	12.2538	13.0006	19.5367	5.38153	6.48968	4.34423	5.04681
ENSMUSG00000079445	2.99799	4.16819e-05	0.00086582	up	1:+:86302832-86307305	1:+:86302832-86307305	ENSMUSG00000079445	227327	Q8K0J2	B3gnt7	UDP-GlcNAc:betaGal beta-1,3-N-acetylglucosaminyltransferase 7 [Source:UniProtKB/Swiss-Prot;Acc:Q8K0J2]	0.93292	1.1382	0.78828	0.43475	0.49444	0.48168	0.03768	0.03048	0.06093	0.10611
ENSMUSG00000100783	-1.95434878985699	5.63084e-05	0.0010689	down	5:+:149231332-149237984	5:+:149231332-149237984	ENSMUSG00000100783	69657	-	2310047D07Rik	RIKEN cDNA 2310047D07 gene [Source:MGI Symbol;Acc:MGI:1916907]	1.23409	0.43065	0.88055	0.54634	1.75441	0.63718	2.52568	1.83885	1.76124	2.97183
ENSMUSG00000084843	-1.82709260114679	4.90252e-05	0.000964886	down	2:-:180370491-180385885	2:-:180370491-180385885	ENSMUSG00000084843	320485	-	B230312C02Rik	RIKEN cDNA B230312C02 gene [Source:MGI Symbol;Acc:MGI:2444130]	3.28015	2.82444	3.4347	5.9218	5.61696	5.45029	6.10286	14.3295	18.7622	9.72182
ENSMUSG00000041736	1.28606	3.9522e-05	0.000838726	up	15:+:83563592-83574203	15:+:83563592-83574203	ENSMUSG00000041736	12257	Q541E3	Tspo	Translocator protein [Source:UniProtKB/Swiss-Prot;Acc:P50637]	115.046	137.25	96.9769	63.0733	70.5224	69.9031	30.8532	40.7381	22.8461	27.3885
ENSMUSG00000028634	1.03432	5.2679e-05	0.00101698	up	4:+:119733784-120138045	4:+:119733784-120138045	ENSMUSG00000028634	16656	A2A884	Hivep3	Transcription factor HIVEP3 [Source:UniProtKB/Swiss-Prot;Acc:A2A884]	0.85564	0.99672	0.81344	0.67416	1.05121	0.68127	0.21521	0.38635	0.32535	0.27039
ENSMUSG00000059852	-1.59829552823324	6.03879e-05	0.00111508	down	18:-:80294546-80364254	18:-:80294546-80364254	ENSMUSG00000059852	240444	F7A6P6	Kcng2	potassium voltage-gated channel modifier subfamily G member 2 [Source:HGNC Symbol;Acc:HGNC:6249]	0.44174	0.6437	0.50222	0.70918	0.46294	0.66668	1.07791	0.80166	1.34941	1.6785
ENSMUSG00000035273	1.35841	5.55762e-05	0.0010624	up	5:-:100679484-100719716	5:-:100679484-100719716	ENSMUSG00000035273	15442	Q6YGZ1	Hpse	Heparanase Heparanase 8 kDa subunit Heparanase 50 kDa subunit [Source:UniProtKB/Swiss-Prot;Acc:Q6YGZ1]	3.82748	4.40652	2.94446	2.72211	4.34614	4.65336	0.76855	1.81137	0.69905	1.10586
ENSMUSG00000021699	-1.81002417406285	3.71634e-05	0.000801449	down	13:+:108449948-109953461	13:+:108449948-109953461	ENSMUSG00000021699	238871	A2RSH1	Pde4d	cAMP-specific 3',5'-cyclic phosphodiesterase 4D [Source:UniProtKB/Swiss-Prot;Acc:Q01063]	2.55901	1.97787	4.97545	6.54865	6.01816	5.49906	9.93784	12.1797	15.9733	12.3588
ENSMUSG00000058163	2.20549	5.92474e-05	0.00109839	up	11:-:48887422-48902214	11:-:48887422-48902214	ENSMUSG00000058163	432555	A6PWD6	Gm5431	predicted gene 5431	0.9336	1.46835	1.00525	1.01458	2.02512	1.68372	0.18838	0.27757	0.08159	0.29229
ENSMUSG00000070390	3.67547	4.87531e-05	0.000961696	up	11:-:71153102-71230733	11:-:71153102-71230733	ENSMUSG00000070390	637515	A1Z198	Nlrp1b	NACHT, LRR and PYD domains-containing protein 1b allele 2 [Source:UniProtKB/Swiss-Prot;Acc:A1Z198]	1.24037	1.34911	0.87846	0.40751	0.68702	0.78181	0.00824	0.17002	0.03998	0.04973
ENSMUSG00000114241	-2.03347716128348	4.948e-05	0.000971228	down	14:+:20794239-20796560	14:+:20794239-20796560	ENSMUSG00000114241	102631887	-	Gm30108	predicted gene, 30108	0.90481	1.12766	1.15287	0.71531	0.53596	0.58396	3.24063	2.5279	1.68432	2.51411
ENSMUSG00000048826	-1.5371565945882	5.72543e-05	0.00107622	down	17:-:14195231-14203831	17:-:14195231-14203831	ENSMUSG00000048826	240025	Q7TN08	Dact2	dishevelled-binding antagonist of beta-catenin 2	0.77765	0.90156	1.34571	1.41828	2.07823	1.68076	1.86914	3.75019	1.86282	3.88607
ENSMUSG00000028007	1.01508	4.92954e-05	0.000968252	up	3:-:117781647-117868936	3:-:117781647-117868936	ENSMUSG00000028007	76561	Q5M8N3	Snx7	sorting nexin 7 [Source:MGI Symbol;Acc:MGI:1923811]	4.99813	4.65381	3.56207	2.95727	3.16125	4.30813	1.23426	1.91828	1.056	1.69357
ENSMUSG00000022436	1.23337	6.09219e-05	0.00112	up	15:+:78899768-78912051	15:+:78899768-78912051	ENSMUSG00000022436	57028	Q6IS27	Sh3bp1	pyridoxal (pyridoxine, vitamin B6) phosphatase	2.98512	2.94082	2.69867	2.29248	2.08397	1.98163	0.87276	0.6619	0.50717	0.87772
ENSMUSG00000039478	-1.08148318638768	4.6407e-05	0.000931436	down	8:+:40307458-40386308	8:+:40307458-40386308	ENSMUSG00000039478	78506	Q9CTY5	Micu3	Calcium uptake protein 3, mitochondrial [Source:UniProtKB/Swiss-Prot;Acc:Q9CTY5]	1.81573	1.89262	2.10319	3.01703	3.02128	2.9744	3.64851	3.6996	4.13794	4.02595
ENSMUSG00000009214	1.60438	4.29053e-05	0.000883632	up	2:-:27061636-27072179	2:-:27061636-27072179	ENSMUSG00000009214	66139	Q9D1N4	Mymk	Protein myomaker [Source:UniProtKB/Swiss-Prot;Acc:Q9D1N4]	94.4739	64.2363	43.0964	31.8409	40.6917	67.6408	15.545	16.1503	11.7618	13.9455
ENSMUSG00000042686	-1.12849056767888	3.47201e-05	0.000762522	down	1:-:16964560-17097889	1:-:16964560-17097889	ENSMUSG00000042686	57339	Q9ET80	Jph1	Junctophilin-1 [Source:UniProtKB/Swiss-Prot;Acc:Q9ET80]	32.8492	21.6588	43.1364	44.6737	41.8651	40.6571	81.7646	62.4641	79.7795	74.9471
ENSMUSG00000042532	-1.46261304367529	6.08611e-05	0.00112	down	19:+:42247574-42270348	19:+:42247574-42270348	ENSMUSG00000042532	71146	Q9D428	Golga7b	golgi autoantigen, golgin subfamily a, 7B [Source:MGI Symbol;Acc:MGI:1918396]	0.91776	0.50835	0.69295	1.20386	1.61075	1.21096	1.79133	2.53241	1.60296	1.51116
ENSMUSG00000097974	-1.08069179985544	5.37903e-05	0.00103434	down	7:+:99625936-99631711	7:+:99625936-99631711	ENSMUSG00000097974	100038557	Q3URZ5	Gm10605	predicted gene 10605	1.82129	1.43284	1.78395	2.78967	2.35994	2.42437	3.26152	2.98589	2.89592	3.46161
ENSMUSG00000089755	-1.78730007078317	6.34554e-05	0.00115381	down	17:-:87362239-87364462	17:-:87362239-87364462	ENSMUSG00000089755	71676	-	0610012D04Rik	RIKEN cDNA 0610012D04 gene [Source:MGI Symbol;Acc:MGI:1918926]	1.14763	1.71633	1.94967	1.69357	2.26597	1.97513	3.22952	4.63131	6.76503	3.42501
ENSMUSG00000112854	3.67168	3.42533e-05	0.000755378	up	10:-:118920381-118927143	10:-:118920381-118927143	ENSMUSG00000112854	216377	-	Gm38403	predicted gene, 38403	1.16345	1.09555	0.94435	0.92659	0.53602	0.7787	0.04409	0	0.08021	0.10643
ENSMUSG00000022797	-1.24931961303032	3.39307e-05	0.000750525	down	16:+:32608920-32632794	16:+:32608920-32632794	ENSMUSG00000022797	22042	Q62351	Tfrc	transferrin receptor [Source:MGI Symbol;Acc:MGI:98822]	54.7402	50.5417	54.8352	71.1824	63.9551	79.639	133.028	188.407	166.505	81.4409
ENSMUSG00000074178	-1.20332274671959	6.52382e-05	0.00117125	down	8:+:86745699-86746603	8:+:86745699-86746603	ENSMUSG00000074178	666945	Q3V0L6,F6QEG2	Gm10638	predicted gene 10638	2.74956	2.40571	2.2307	2.91007	1.99431	2.72339	3.90462	3.27479	3.83004	4.92004
ENSMUSG00000070034	1.64536	6.4159e-05	0.00116155	up	1:-:85576899-85598817	1:-:85576899-85598817	ENSMUSG00000070034	109032	Q8BVK9	Sp110	Sp110 nuclear body protein [Source:UniProtKB/Swiss-Prot;Acc:Q8BVK9]	1.19823	1.20214	1.15268	1.57247	2.44869	1.42294	0.24523	0.49285	0.22305	0.38843
ENSMUSG00000078490	-1.14973992902706	5.85476e-05	0.0010899	down	4:+:155409190-155466823	4:+:155409190-155466823	ENSMUSG00000078490	544678	Q3UY96	Cfap74	Cilia- and flagella-associated protein 74 [Source:UniProtKB/Swiss-Prot;Acc:Q3UY96]	0.6226	0.43758	0.40054	0.65842	0.90687	0.53225	0.71022	0.9822	0.93098	1.03986
ENSMUSG00000039853	1.49342	6.66676e-05	0.00119123	up	4:-:46493781-46536141	4:-:46493781-46536141	ENSMUSG00000039853	74735	Q14AR3	Trim14	tripartite motif-containing 14 [Source:MGI Symbol;Acc:MGI:1921985]	1.10041	1.45896	0.93074	1.24382	1.4978	1.29347	0.19167	0.47969	0.18886	0.47707
ENSMUSG00000037855	1.89511	6.65503e-05	0.00119029	up	10:-:67886103-67912662	10:-:67886103-67912662	ENSMUSG00000037855	216049	Q8BG89	Zfp365	zinc finger protein 365 [Source:MGI Symbol;Acc:MGI:2143676]	2.71231	1.71204	1.04422	1.32048	1.37545	1.87393	0.3095	0.23018	0.21794	0.48195
ENSMUSG00000030664	-1.78716468263803	6.51129e-05	0.00116988	down	7:+:116031979-116032550	7:+:116031979-116032550	ENSMUSG00000030664	68469	Q9CTI5	Sox6os	SRY (sex determining region Y)-box 6, opposite strand	2.1764	1.20552	1.47896	2.29409	2.57835	2.37228	6.43387	3.90353	3.00103	6.27131
ENSMUSG00000059326	2.41541	5.79207e-05	0.00108111	up	19:-:61224402-61228418	19:-:61224402-61228418	ENSMUSG00000059326	12982	Q00941	Csf2ra	colony stimulating factor 2 receptor, alpha, low-affinity (granulocyte-macrophage)	25.5698	31.3813	27.8835	9.93568	13.1126	11.231	2.02355	4.12651	1.36337	3.18823
ENSMUSG00000055805	1.02411	4.96227e-05	0.000972879	up	11:+:103171107-103198901	11:+:103171107-103198901	ENSMUSG00000055805	57778	Q9JL26	Fmnl1	Formin-like protein 1 [Source:UniProtKB/Swiss-Prot;Acc:Q9JL26]	9.01117	8.39372	8.49662	5.45586	9.97357	6.05322	2.49938	4.06529	2.4378	3.02912
ENSMUSG00000020905	-1.22452799321159	6.71646e-05	0.00119646	down	11:-:67854523-67922153	11:-:67854523-67922153	ENSMUSG00000020905	216835	Q8BUM9	Usp43	ubiquitin specific peptidase 43 [Source:MGI Symbol;Acc:MGI:2444541]	0.32107	0.41615	0.69818	0.50088	0.46912	0.41996	0.77757	0.93024	0.55783	0.72692
ENSMUSG00000038663	-1.02478292977815	3.89834e-05	0.000830907	down	7:-:81533308-81566944	7:-:81533308-81566944	ENSMUSG00000038663	244091	Q8C1E6	Fsd2	fibronectin type III and SPRY domain containing 2 [Source:HGNC Symbol;Acc:HGNC:18024]	25.8182	18.2198	28.5642	33.2859	37.1084	32.8851	49.8142	48.2304	60.3173	54.9704
ENSMUSG00000109341	2.59898	3.53512e-05	0.000773186	up	7:+:84338095-84347869	7:+:84338095-84347869	ENSMUSG00000109341	102632922	-	Gm30873	predicted gene, 30873 [Source:MGI Symbol;Acc:MGI:5590032]	1.1636	0.91154	0.76248	1.0513	1.03387	1.24448	0.1701	0.1548	0.05157	0.05132
ENSMUSG00000063506	2.63418	6.4885e-05	0.00116907	up	14:+:33214026-33369934	14:+:33214026-33369934	ENSMUSG00000063506	239027	Q8BL80	Arhgap22	Rho GTPase activating protein 22 [Source:MGI Symbol;Acc:MGI:2443418]	1.71634	1.76349	1.84298	0.72918	0.80712	0.83882	0.13407	0.11388	0.09756	0.17798
ENSMUSG00000032691	3.38145	4.44329e-05	0.000906171	up	11:+:59541568-59566956	11:+:59541568-59566956	ENSMUSG00000032691	216799	Q8R4B8	Nlrp3	NACHT, LRR and PYD domains-containing protein 3 [Source:UniProtKB/Swiss-Prot;Acc:Q8R4B8]	0.77607	0.96097	1.16108	0.55416	0.41521	0.47825	0.02562	0.01554	0.0466	0.10821
ENSMUSG00000031264	1.87591	6.8124e-05	0.00120914	up	X:-:134542336-134583570	X:-:134542336-134583570	ENSMUSG00000031264	12229	P35991	Btk	Tyrosine-protein kinase BTK [Source:UniProtKB/Swiss-Prot;Acc:P35991]	3.70912	5.06478	4.48761	2.5702	3.8401	2.21483	0.42906	1.54189	0.38025	0.81653
ENSMUSG00000038742	-1.14696096370668	7.23504e-05	0.00126423	down	9:-:20873808-20879727	9:-:20873808-20879727	ENSMUSG00000038742	70726	Q8R0Z6	Angptl6	Angiopoietin-related protein 6 [Source:UniProtKB/Swiss-Prot;Acc:Q8R0Z6]	1.05931	1.44022	1.37426	1.33991	1.29298	0.96129	1.87235	2.31183	1.83249	1.62531
ENSMUSG00000050174	-1.11329228373269	6.79705e-05	0.00120785	down	3:-:37404910-37420211	3:-:37404910-37420211	ENSMUSG00000050174	229228	A0A0R4J176	Nudt6	nudix hydrolase 6 [Source:HGNC Symbol;Acc:HGNC:8053]	2.57396	2.20401	2.77802	2.3365	3.08521	1.75112	4.4312	2.93289	3.26946	4.03877
ENSMUSG00000018740	-1.21056378149572	6.64297e-05	0.00118916	down	11:+:68968131-68974365	11:+:68968131-68974365	ENSMUSG00000018740	71998	Q5SWT3	Slc25a35	Solute carrier family 25 member 35 [Source:UniProtKB/Swiss-Prot;Acc:Q5SWT3]	0.98057	0.97766	0.99952	1.46742	1.50527	1.68287	1.82312	2.88104	2.03959	1.55205
ENSMUSG00000020268	-1.07401073023974	6.49243e-05	0.00116907	down	11:-:54826866-54860916	11:-:54826866-54860916	ENSMUSG00000020268	75530	Q9DA03	Lyrm7	Complex III assembly factor LYRM7 [Source:UniProtKB/Swiss-Prot;Acc:Q9DA03]	1.60946	1.67506	1.46786	1.25005	2.09069	1.61824	2.96164	1.80564	2.40032	2.59779
ENSMUSG00000018566	-1.02839758121116	4.15325e-05	0.000865092	down	11:-:69942539-69948188	11:-:69942539-69948188	ENSMUSG00000018566	20528	P14142	Slc2a4	solute carrier family 2 (facilitated glucose transporter), member 4 [Source:MGI Symbol;Acc:MGI:95758]	33.6702	22.3315	44.7537	47.7419	40.494	39.3374	70.6873	69.6021	68.8019	70.0158
ENSMUSG00000034842	-1.15095958027546	4.31809e-05	0.000888059	down	5:+:92331827-92414628	5:+:92331827-92414628	ENSMUSG00000034842	109979	Q8R2G4	Art3	ADP-ribosyltransferase 3 [Source:MGI Symbol;Acc:MGI:1202729]	16.4282	13.9585	21.2215	29.3564	24.8633	26.8334	42.1727	39.3706	35.7582	50.7192
ENSMUSG00000034786	1.63565	7.15708e-05	0.0012551	up	17:+:34589806-34591754	17:+:34589806-34591754	ENSMUSG00000034786	106512	Q0VGT5	Gpsm3	G-protein signalling modulator 3 (AGS3-like, C. elegans) [Source:MGI Symbol;Acc:MGI:2146785]	9.52884	9.12352	10.0983	4.5916	7.07783	5.46655	1.31559	2.958	1.22008	1.58767
ENSMUSG00000032725	1.0778	6.90674e-05	0.00122011	up	7:-:101839988-101857194	7:-:101839988-101857194	ENSMUSG00000032725	14276	Q05685	Folr2	Folate receptor beta [Source:UniProtKB/Swiss-Prot;Acc:Q05685]	6.56955	9.30105	6.39513	5.81684	7.04349	5.25755	1.91595	3.42613	1.63057	2.0688
ENSMUSG00000028019	1.26021	6.84418e-05	0.00121331	up	3:+:81036416-81214040	3:+:81036416-81214040	ENSMUSG00000028019	54635	Q8CI19	Pdgfc	platelet-derived growth factor, C polypeptide [Source:MGI Symbol;Acc:MGI:1859631]	2.20534	2.43757	2.02416	2.28462	2.36438	2.77192	0.53099	1.31343	0.3839	0.77637
ENSMUSG00000115505	-1.6096753114989	7.27054e-05	0.00126817	down	14:-:93194698-93195696	14:-:93194698-93195696	ENSMUSG00000115505	-	-	AC123061.1	-	0.86417	0.60819	0.77723	1.09308	1.08399	0.47243	1.40448	1.70425	2.0818	1.5694
ENSMUSG00000025597	-1.28560240388346	6.06018e-05	0.00111833	down	X:+:114474333-114560829	X:+:114474333-114560829	ENSMUSG00000025597	237010	Q8BUX1	Klhl4	kelch-like protein 4 isoform 3 [Source:RefSeq peptide;Acc:NP_001277407]	1.48777	2.20384	2.0509	3.67413	3.64259	2.35569	3.94384	5.43656	4.57188	3.72709
ENSMUSG00000039395	-1.31248726431379	5.57931e-05	0.00106526	down	1:-:72159442-72212307	1:-:72159442-72212307	ENSMUSG00000039395	381269	Q6NVG5	Mreg	Melanoregulin [Source:UniProtKB/Swiss-Prot;Acc:Q6NVG5]	4.64692	5.51984	7.09371	9.08395	9.03477	7.80628	11.3533	10.1874	17.6041	15.7881
ENSMUSG00000011305	-1.43484826339866	5.76897e-05	0.00108079	down	17:-:56111601-56117596	17:-:56111601-56117596	ENSMUSG00000011305	66968	Q8BVZ1	Plin5	Perilipin-5 [Source:UniProtKB/Swiss-Prot;Acc:Q8BVZ1]	6.76453	4.34264	9.87156	6.80203	5.99598	4.34695	18.4259	15.7114	7.54931	11.3286
ENSMUSG00000025425	-1.2174166901886	6.12059e-05	0.00112381	down	18:+:77185853-77255450	18:+:77185853-77255450	ENSMUSG00000025425	225742	Q3TRR3	St8sia5	Alpha-2,8-sialyltransferase 8E [Source:UniProtKB/Swiss-Prot;Acc:P70126]	3.68096	3.04225	4.64071	6.18759	6.31166	5.52656	6.6661	8.08887	9.13618	9.15127
ENSMUSG00000041261	-1.39419648079361	7.07873e-05	0.00124285	down	4:-:8143362-8239041	4:-:8143362-8239041	ENSMUSG00000041261	12319	P28651	Car8	Carbonic anhydrase-related protein [Source:UniProtKB/Swiss-Prot;Acc:P28651]	0.68536	0.67018	1.15538	1.43373	1.81125	1.22491	1.61845	2.94583	1.61929	2.22987
ENSMUSG00000108607	-1.6822744346676	7.82348e-05	0.00134068	down	7:+:44501689-44504266	7:+:44501689-44504266	ENSMUSG00000108607	-	-	Gm44646	predicted gene 44646 [Source:MGI Symbol;Acc:MGI:5753222]	0.94479	1.41298	1.12355	2.88806	3.26458	2.19515	3.9478	3.71499	3.7129	4.27811
ENSMUSG00000019235	-1.28995780139822	7.81069e-05	0.00134045	down	12:-:85135249-85151264	12:-:85135249-85151264	ENSMUSG00000019235	238323	Q8R2S1	Rps6kl1	ribosomal protein S6 kinase-like 1	0.35974	0.54996	0.73337	0.39436	0.4972	0.35909	0.73623	0.7147	0.77382	0.96254
ENSMUSG00000032596	1.00262	6.27187e-05	0.00114486	up	9:+:107975505-107984060	9:+:107975505-107984060	ENSMUSG00000032596	74153	Q9DBK7	Uba7	ubiquitin-like modifier activating enzyme 7 [Source:MGI Symbol;Acc:MGI:1349462]	3.35414	3.55603	3.15594	3.57072	5.27717	3.51062	1.25799	2.02589	1.01709	1.3401
ENSMUSG00000096929	-1.62433140050395	7.39312e-05	0.00128345	down	1:+:194976375-195037904	1:+:194976375-195037904	ENSMUSG00000096929	320977	Q3TB91	A330023F24Rik	RIKEN cDNA A330023F24 gene	0.36374	0.2111	0.3099	0.59057	0.53383	0.39243	0.64443	0.59322	0.90281	1.34759
ENSMUSG00000090659	-1.47565766114873	8.04459e-05	0.00136263	down	13:+:67779693-67792512	13:+:67779693-67792512	ENSMUSG00000090659	72958	E9Q1L8	Zfp493	zinc finger protein 493 [Source:MGI Symbol;Acc:MGI:1920208]	0.26493	0.38037	0.17283	0.24128	0.57751	0.33924	0.50968	0.59215	0.59181	0.68053
ENSMUSG00000059248	1.00508	4.80709e-05	0.000953151	up	11:+:117199661-117362325	11:+:117199661-117362325	ENSMUSG00000059248	53860	Q80UG5	Sept9	Septin-9 [Source:UniProtKB/Swiss-Prot;Acc:Q80UG5]	25.1262	28.0432	24.2704	14.9866	17.448	16.7752	8.83386	11.4111	6.85615	8.77901
ENSMUSG00000081936	2.88579	3.75253e-05	0.00080747	up	4:-:76811555-76811791	4:-:76811555-76811791	ENSMUSG00000081936	-	-	Gm11244	predicted gene 11244 [Source:MGI Symbol;Acc:MGI:3651883]	1.07136	0.42727	0.43682	1.62619	0.76154	1.99139	0	0	0	0
ENSMUSG00000029561	2.36351	7.20667e-05	0.00126153	up	5:+:114896936-114912234	5:+:114896936-114912234	ENSMUSG00000029561	23962	Q9Z2F2	Oasl2	2'-5'-oligoadenylate synthase-like protein 2 [Source:UniProtKB/Swiss-Prot;Acc:Q9Z2F2]	4.14292	2.44659	3.41085	5.96593	7.0695	6.01404	0.70114	1.31575	0.30651	0.5313
ENSMUSG00000025188	1.1581	7.2686e-05	0.00126817	up	19:-:42755105-42779978	19:-:42755105-42779978	ENSMUSG00000025188	192236	O08983	Hps1	Mus musculus HPS1, biosis of lysosomal organelles complex 3 subunit 1 (Hps1), transcript variant 2, mRNA. [Source:RefSeq mRNA;Acc:NM_001346703]	2.8362	3.00937	2.90867	1.9199	2.41468	1.92563	0.55915	1.30314	0.52742	0.99613
ENSMUSG00000020847	-1.25197866414426	8.07951e-05	0.00136378	down	11:-:75830999-75938429	11:-:75830999-75938429	ENSMUSG00000020847	380714	Q768S4	Rph3al	Rab effector Noc2 [Source:UniProtKB/Swiss-Prot;Acc:Q768S4]	0.67905	0.55756	0.9229	0.75788	0.88334	0.42623	1.06275	1.15731	1.3219	0.97013
ENSMUSG00000026956	1.43076	6.4648e-05	0.00116725	up	2:-:25359889-25365682	2:-:25359889-25365682	ENSMUSG00000026956	227620	Q3TW96	Uap1l1	UDP-N-acteylglucosamine pyrophosphorylase 1-like 1 [Source:MGI Symbol;Acc:MGI:2443318]	9.9295	12.86	8.49377	4.71779	5.66	7.02031	2.01685	2.64868	1.82671	2.2337
ENSMUSG00000037370	1.23669	6.06858e-05	0.00111847	up	10:-:24637914-24712159	10:-:24637914-24712159	ENSMUSG00000037370	18605	A0A0R4J1Q7	Enpp1	ectonucleotide pyrophosphatase/phosphodiesterase family member 1 isoform 3 [Source:RefSeq peptide;Acc:NP_001295258]	5.25304	6.01243	4.94574	3.30034	3.00896	3.34874	1.1146	2.15785	1.13669	1.34512
ENSMUSG00000021477	1.12627	4.64351e-05	0.000931436	up	13:-:64359337-64370890	13:-:64359337-64370890	ENSMUSG00000021477	13039	Q543M3	Ctsl	cathepsin L	62.8503	91.8612	58.9431	39.2396	39.7369	48.0032	22.8157	26.3831	18.2101	25.7753
ENSMUSG00000068122	1.37254	5.68089e-05	0.00107336	up	X:+:21484544-21489164	X:+:21484544-21489164	ENSMUSG00000068122	11609	P35374	Agtr2	Type-2 angiotensin II receptor [Source:UniProtKB/Swiss-Prot;Acc:P35374]	22.7652	16.9432	13.0577	24.2569	22.7731	34.0559	5.51532	7.90583	5.94973	7.20277
ENSMUSG00000004207	1.26457	4.17448e-05	0.00086582	up	10:+:60277627-60302597	10:+:60277627-60302597	ENSMUSG00000004207	19156	Q3UFE8	Psap	prosaposin [Source:MGI Symbol;Acc:MGI:97783]	682.29	777.209	558.346	386.32	461.736	438.343	229.604	275.852	198.16	209.349
ENSMUSG00000099411	-1.13386660170039	6.89909e-05	0.00122009	down	16:-:13514131-13521107	16:-:13514131-13521107	ENSMUSG00000099411	70100	Q3UW10	2310015D24Rik	RIKEN cDNA 2310015D24 gene	2.35926	1.9185	3.25762	2.34927	3.687	3.24833	5.35925	3.78135	4.25682	4.25664
ENSMUSG00000057596	1.70202	8.07051e-05	0.00136356	up	7:-:104470014-104507849	7:-:104470014-104507849	ENSMUSG00000057596	209387	Q3TNW3	Trim30d	tripartite motif-containing 30D [Source:MGI Symbol;Acc:MGI:3035181]	2.59454	2.41168	2.3554	3.23053	4.41846	4.28393	0.41484	1.00677	0.72111	0.66752
ENSMUSG00000048731	-1.00257530435636	7.24257e-05	0.00126479	down	17:+:26973217-27036378	17:+:26973217-27036378	ENSMUSG00000048731	70772	Q6K1E7	Ggnbp1	Gametotin-binding protein 1 [Source:UniProtKB/Swiss-Prot;Acc:Q6K1E7]	0.97279	0.6782	1.13324	1.16571	1.29976	0.85348	1.61668	1.52579	1.16186	1.47231
ENSMUSG00000037887	-1.40537549040634	5.84036e-05	0.00108874	down	7:-:142079490-142095843	7:-:142079490-142095843	ENSMUSG00000037887	18218	Q7TSZ9	Dusp8	Dual specificity protein phosphatase 8 [Source:UniProtKB/Swiss-Prot;Acc:O09112]	3.00316	2.65115	4.8575	5.51335	5.39848	4.99632	6.50907	7.65231	12.0349	10.3792
ENSMUSG00000074971	1.27216	5.966e-05	0.00110443	up	2:-:110360917-110363183	2:-:110360917-110363183	ENSMUSG00000074971	67606	Q9CQS3	Fibin	Fin bud initiation factor homolog [Source:UniProtKB/Swiss-Prot;Acc:Q9CQS3]	36.0653	28.0518	24.2264	19.2392	16.6128	21.8133	10.682	9.42936	5.64331	6.11363
ENSMUSG00000101257	-1.5197242965909	7.35855e-05	0.00127971	down	1:+:80225044-80228792	1:+:80225044-80228792	ENSMUSG00000101257	69565	-	2310015K22Rik	RIKEN cDNA 2310015K22 gene [Source:MGI Symbol;Acc:MGI:1916815]	3.09354	1.76743	2.97615	6.15526	4.81787	5.77879	6.97147	7.5962	8.54092	8.11279
ENSMUSG00000074121	-1.01211256133876	8.28503e-05	0.00139206	down	7:+:45413695-45417179	7:+:45413695-45417179	ENSMUSG00000074121	78405	Q80VU4	Ntf5	Neurotrophin-4 [Source:UniProtKB/Swiss-Prot;Acc:Q80VU4]	1.20592	0.95424	1.20971	1.08954	1.45132	1.08714	1.97835	1.59247	1.33027	1.58378
ENSMUSG00000020077	1.35352	6.13887e-05	0.00112646	up	10:-:62493833-62527451	10:-:62493833-62527451	ENSMUSG00000020077	19073	P13609	Srgn	Mus musculus serglycin (Srgn), transcript variant 2, mRNA. [Source:RefSeq mRNA;Acc:NM_001358965]	21.9688	36.2907	28.7105	15.2981	19.9169	16.6203	6.24726	10.2224	5.05091	6.62543
ENSMUSG00000091387	1.84364	8.07351e-05	0.00136356	up	13:+:96924689-96950906	13:+:96924689-96950906	ENSMUSG00000091387	218476	E9Q649	Gcnt4	glucosaminyl (N-acetyl) transferase 4, core 2 (beta-1,6-N-acetylglucosaminyltransferase)	0.53907	0.67682	0.52914	0.6945	0.37845	0.58759	0.10215	0.18594	0.07433	0.0863
ENSMUSG00000020634	-1.05676791143136	5.44059e-05	0.00104224	down	12:-:4879032-4907705	12:-:4879032-4907705	ENSMUSG00000020634	217379	Q99KJ0	Ubxn2a	UBX domain protein 2A [Source:MGI Symbol;Acc:MGI:2442310]	12.3175	10.8625	14.8316	20.227	18.7738	18.5585	23.4031	24.6862	29.1866	30.3558
ENSMUSG00000040152	1.51813	5.18005e-05	0.00100333	up	2:+:118111876-118127133	2:+:118111876-118127133	ENSMUSG00000040152	21825	Q80YQ1	Thbs1	thrombospondin 1 [Source:MGI Symbol;Acc:MGI:98737]	36.3581	52.6744	46.5728	22.5503	22.7946	24.6786	7.6584	14.796	7.08773	11.4934
ENSMUSG00000107451	-1.70103707908189	8.71699e-05	0.00144534	down	6:+:90478466-90479686	6:+:90478466-90479686	ENSMUSG00000107451	-	-	Gm44421	predicted gene, 44421 [Source:MGI Symbol;Acc:MGI:5690813]	0.58227	0.37321	0.7631	0.68391	1.08399	1.07371	1.2768	1.70425	2.16782	1.59223
ENSMUSG00000115307	-2.86490733403779	6.63466e-05	0.0011884	down	15:-:38239702-38255310	15:-:38239702-38255310	ENSMUSG00000115307	-	-	AC122459.2	-	0.39798	0.07936	0.64907	0.20136	0.47149	0.57536	1.71048	1.08719	1.77804	2.8506
ENSMUSG00000030048	-1.43676001896228	8.53789e-05	0.00142258	down	6:-:87383256-87388935	6:-:87383256-87388935	ENSMUSG00000030048	68888	Q9D0T7	Gkn3	Gastrokine-3 [Source:UniProtKB/Swiss-Prot;Acc:Q9D0T7]	0.77123	0.82809	0.96755	1.05056	0.7731	0.7964	1.45699	2.35727	1.10435	1.9781
ENSMUSG00000040026	4.99237	6.19751e-05	0.00113509	up	7:-:46711998-46715700	7:-:46711998-46715700	ENSMUSG00000040026	20210	P04918	Saa3	Serum amyloid A-3 protein [Source:UniProtKB/Swiss-Prot;Acc:P04918]	0.62358	1.63203	0.9733	0.24649	0.06926	0.16098	0	0	0	0
ENSMUSG00000084384	-1.12481755886916	8.13345e-05	0.00137131	down	11:-:58392769-58393560	11:-:58392769-58393560	ENSMUSG00000084384	624814	-	Gm12251	predicted gene 12251 [Source:MGI Symbol;Acc:MGI:3652216]	6.92491	7.86327	6.07831	5.10956	4.55769	5.23074	11.1543	10.4299	8.43471	6.49303
ENSMUSG00000037754	-1.02965856912169	6.80103e-05	0.00120785	down	2:+:158665398-158766334	2:+:158665398-158766334	ENSMUSG00000037754	228852	Q8VHQ3	Ppp1r16b	protein phosphatase 1, regulatory (inhibitor) subunit 16B [Source:MGI Symbol;Acc:MGI:2151841]	1.00486	1.17935	1.55104	1.71408	1.91831	1.38156	2.49723	2.17463	1.74585	2.38968
ENSMUSG00000015653	1.16753	8.53958e-05	0.00142258	up	5:-:5664829-5694578	5:-:5664829-5694578	ENSMUSG00000015653	74051	B2RX33	Steap2	six transmembrane epithelial antigen of prostate 2 [Source:MGI Symbol;Acc:MGI:1921301]	0.67325	1.00897	0.66495	0.83044	0.92145	0.6175	0.21396	0.22328	0.17644	0.35632
ENSMUSG00000063594	1.99596	7.94901e-05	0.00135189	up	7:+:16891786-16895436	7:+:16891786-16895436	ENSMUSG00000063594	14709	Q3UMY0	Gng8	guanine nucleotide binding protein (G protein), gamma 8 [Source:MGI Symbol;Acc:MGI:109163]	1.93521	1.7964	1.70052	1.30832	1.10678	1.41264	0.34143	0.16572	0.28985	0.24723
ENSMUSG00000104045	4.05686	5.65962e-05	0.00107211	up	2:+:12697417-12706853	2:+:12697417-12706853	ENSMUSG00000104045	-	-	Gm37565	predicted gene, 37565 [Source:MGI Symbol;Acc:MGI:5610793]	2.17197	1.54679	1.47595	0.13082	1.10276	1.60203	0	0	0	0
ENSMUSG00000039942	1.07168	8.62149e-05	0.00143297	up	15:-:5206661-5244187	15:-:5206661-5244187	ENSMUSG00000039942	19219	P32240	Ptger4	prostaglandin E receptor 4 (subtype EP4) [Source:MGI Symbol;Acc:MGI:104311]	1.48192	1.53845	1.5417	1.32373	1.62892	1.46718	0.28922	0.55962	0.54983	0.68864
ENSMUSG00000002910	-1.58560333987392	6.82081e-05	0.0012099	down	8:-:70835129-70839720	8:-:70835129-70839720	ENSMUSG00000002910	70807	Q9D668	Arrdc2	Arrestin domain-containing protein 2 [Source:UniProtKB/Swiss-Prot;Acc:Q9D668]	6.91348	4.52741	2.29029	4.03453	3.96486	4.29968	8.11967	17.4226	10.1201	5.95697
ENSMUSG00000099465	1.44146	9.54591e-05	0.00154028	up	8:+:105164587-105170367	8:+:105164587-105170367	ENSMUSG00000099465	100042408	-	Gm3830	predicted gene 3830 [Source:MGI Symbol;Acc:MGI:3782002]	3.10914	2.21422	1.84116	1.87273	1.78906	2.35444	0.42421	0.73536	0.44097	0.62165
ENSMUSG00000024521	4.05323	9.29629e-05	0.00150999	up	18:+:66458604-66465550	18:+:66458604-66465550	ENSMUSG00000024521	58801	Q9JM54	Pmaip1	phorbol-12-myristate-13-acetate-induced protein 1	8.9052	7.86457	4.91031	2.16057	2.91031	5.19245	0.25531	0.35747	0.04764	0.33182
ENSMUSG00000099206	-2.68567508395401	4.41432e-05	0.00090395	down	2:+:84703262-84703362	2:+:84703262-84703362	ENSMUSG00000099206	-	-	Gm27942	predicted gene, 27942 [Source:MGI Symbol;Acc:MGI:5531324]	0	0	0.51251	0	0.59566	0	2.05805	1.24866	1.87193	1.24184
ENSMUSG00000091515	-1.19142914088748	9.67439e-05	0.00155161	down	17:-:33305040-33305745	17:-:33305040-33305745	ENSMUSG00000091515	100416808	-	Zfp422-ps	zinc finger protein 422, pseudogene [Source:MGI Symbol;Acc:MGI:3028594]	3.38071	2.94037	2.12627	5.27706	3.83466	3.78815	4.78439	5.62691	5.44521	5.68504
ENSMUSG00000029685	-1.00763578900427	9.33391e-05	0.00151442	down	6:+:24528144-24573164	6:+:24528144-24573164	ENSMUSG00000029685	78910	Q8C565	Asb15	Ankyrin repeat and SOCS box protein 15 [Source:UniProtKB/Swiss-Prot;Acc:Q8VHS6]	0.97116	0.6868	0.73669	0.84275	0.70904	0.96787	1.34046	1.23394	0.995	0.99013
ENSMUSG00000034330	1.53996	8.58666e-05	0.0014288	up	8:+:117498291-117635142	8:+:117498291-117635142	ENSMUSG00000034330	234779	Q8CIH5	Plcg2	1-phosphatidylinositol 4,5-bisphosphate phosphodiesterase gamma-2 [Source:UniProtKB/Swiss-Prot;Acc:Q8CIH5]	4.6789	5.63099	5.37148	3.00399	5.36107	2.86723	0.72544	1.92194	0.61585	1.48831
ENSMUSG00000009876	-1.27250563516355	9.70851e-05	0.00155538	down	2:+:152754173-152765037	2:+:152754173-152765037	ENSMUSG00000009876	84682	Q91W29	Cox4i2	Cytochrome c oxidase subunit 4 isoform 2, mitochondrial [Source:UniProtKB/Swiss-Prot;Acc:Q91W29]	2.90002	5.14028	3.61295	3.34215	2.51946	2.59537	6.59465	7.12193	4.23876	4.37719
ENSMUSG00000048234	1.28653	7.4103e-05	0.00128565	up	1:-:39551296-39577405	1:-:39551296-39577405	ENSMUSG00000048234	67702	Q3U2C5	Rnf149	E3 ubiquitin-protein ligase RNF149 [Source:UniProtKB/Swiss-Prot;Acc:Q3U2C5]	16.8023	20.0707	13.7343	8.23868	10.4721	10.4399	3.93681	4.77705	2.86462	4.79519
ENSMUSG00000036960	-2.08418464458011	0.000101441	0.00160238	down	3:-:145070263-145099443	3:-:145070263-145099443	ENSMUSG00000036960	229933	Q8BG22	Clca2	Calcium-activated chloride channel regulator 2 [Source:UniProtKB/Swiss-Prot;Acc:Q8BG22]	0.08744	0.13078	0.11142	0.20739	0.32373	0.49663	0.41385	0.74648	0.6918	0.48594
ENSMUSG00000072945	3.42256	9.41636e-05	0.00152358	up	X:-:139779549-139782353	X:-:139779549-139782353	ENSMUSG00000072945	622473	Q2WG77	Ripply1	Protein ripply1 [Source:UniProtKB/Swiss-Prot;Acc:Q2WG77]	11.1459	8.11606	2.99987	9.02927	6.30547	12.3502	0.44853	0.38876	0.31083	0.77328
ENSMUSG00000064246	1.45973	0.000103235	0.00162457	up	1:+:134182176-134190181	1:+:134182176-134190181	ENSMUSG00000064246	12654	Q61362	Chil1	Chitinase-3-like protein 1 [Source:UniProtKB/Swiss-Prot;Acc:Q61362]	2.20952	1.51679	1.71684	1.48903	1.84518	2.48734	0.27799	0.65216	0.51694	0.49204
ENSMUSG00000006411	2.52444	8.34166e-05	0.00139836	up	1:+:171370099-171388598	1:+:171370099-171388598	ENSMUSG00000006411	71740	Q8R007	Nectin4	Nectin-4 [Source:UniProtKB/Swiss-Prot;Acc:Q8R007]	0.81339	1.0002	0.46983	0.53157	0.73877	0.41997	0.11098	0.11783	0.05047	0.03348
ENSMUSG00000025498	2.45834	9.80145e-05	0.00156599	up	7:-:141262706-141266481	7:-:141262706-141266481	ENSMUSG00000025498	54123	P70434	Irf7	interferon regulatory factor 7 [Source:MGI Symbol;Acc:MGI:1859212]	4.14223	2.65495	4.08516	7.43392	8.47615	6.305	0.56425	1.25246	0.43394	0.58129
ENSMUSG00000004933	1.97032	0.000105548	0.00165033	up	10:+:81252935-81263365	10:+:81252935-81263365	ENSMUSG00000004933	17179	A0A0R4J1N6	Matk	megakaryocyte-associated tyrosine kinase [Source:HGNC Symbol;Acc:HGNC:6906]	2.01185	2.17119	1.73522	0.85292	1.34886	1.27846	0.28279	0.54904	0.19206	0.16381
ENSMUSG00000110235	2.44314	7.36439e-05	0.00127996	up	13:+:97559971-97583996	13:+:97559971-97583996	ENSMUSG00000110235	328314	-	Gm5086	predicted gene 5086	0.8711	1.0563	0.64795	0.53603	0.9483	0.6321	0.12046	0.02923	0.08765	0.14537
ENSMUSG00000050211	-1.05685966481548	6.97709e-05	0.00122829	down	2:-:120166412-120245335	2:-:120166412-120245335	ENSMUSG00000050211	329502	Q50L42	Pla2g4e	Cytosolic phospholipase A2 epsilon [Source:UniProtKB/Swiss-Prot;Acc:Q50L42]	3.95463	2.85895	5.62261	4.66992	4.49483	3.11173	7.21997	5.3363	7.0356	7.37961
ENSMUSG00000091649	2.49745	0.000102599	0.00161804	up	14:-:59320964-59341351	14:-:59320964-59341351	ENSMUSG00000091649	236451	B4XVQ1	Phf11b	PHD finger protein 11B	2.40188	2.30922	3.01663	4.66568	5.58933	4.20759	0.21945	0.74561	0.69196	0.26484
ENSMUSG00000078920	1.71101	0.000104735	0.00164024	up	11:+:49076587-49096974	11:+:49076587-49096974	ENSMUSG00000078920	15953	Q61635	Ifi47	interferon gamma inducible protein 47	3.22397	2.82539	2.70017	4.98707	5.425	4.36822	0.79851	1.17292	0.45871	0.91293
ENSMUSG00000028364	3.06941	6.34703e-05	0.00115381	up	4:-:63959785-64047015	4:-:63959785-64047015	ENSMUSG00000028364	21923	Q8C9Z1	Tnc	tenascin C [Source:MGI Symbol;Acc:MGI:101922]	101.5	139.732	81.6084	23.5135	31.9231	32.7985	5.91068	15.0746	2.83808	4.3896
ENSMUSG00000073418	3.43103	8.02949e-05	0.00136162	up	17:-:34728380-34743882	17:-:34728380-34743882	ENSMUSG00000073418	12268	P01029	C4b	Complement C4-B Complement C4 beta chain Complement C4 alpha chain C4a anaphylatoxin Complement C4 gamma chain [Source:UniProtKB/Swiss-Prot;Acc:P01029]	9.57692	22.991	9.31655	35.1119	42.224	25.2945	0.62049	2.01517	0.90742	4.50389
ENSMUSG00000110291	-2.06972801790777	7.8236e-05	0.00134068	down	16:+:23988482-23988595	16:+:23988482-23988595	ENSMUSG00000110291	-	A0A1B0GRL2	Gm37419	-	2.22731	3.10897	2.27034	1.69038	1.05547	1.38	5.47009	7.19072	4.42257	7.70161
ENSMUSG00000030087	-1.02327656421164	7.93917e-05	0.00135114	down	6:+:90462576-90475238	6:+:90462576-90475238	ENSMUSG00000030087	66277	Q9EPW2	Klf15	Krueppel-like factor 15 [Source:UniProtKB/Swiss-Prot;Acc:Q9EPW2]	4.8763	4.09988	3.87625	6.90446	6.014	6.51975	6.57254	8.94683	8.67084	8.49357
ENSMUSG00000021298	2.20285	0.00010687	0.0016639	up	12:-:112850873-112868228	12:-:112850873-112868228	ENSMUSG00000021298	56696	Q9Z282	Gpr132	G protein-coupled receptor 132	1.21579	1.43597	1.35367	0.87539	2.37101	1.69971	0.0957	0.44128	0.25534	0.18479
ENSMUSG00000031389	1.98736	0.000104025	0.00163409	up	X:-:73891442-73921870	X:-:73891442-73921870	ENSMUSG00000031389	171207	B1AUY2	Arhgap4	Rho GTPase activating protein 4 [Source:MGI Symbol;Acc:MGI:2159577]	1.67291	2.39259	1.80103	1.19672	2.35302	1.0158	0.22441	0.49792	0.11663	0.55711
ENSMUSG00000034854	1.2067	8.93851e-05	0.00147229	up	10:+:81357491-81366225	10:+:81357491-81366225	ENSMUSG00000034854	73822	Q3U481	Mfsd12	Major facilitator superfamily domain-containing protein 12 [Source:UniProtKB/Swiss-Prot;Acc:Q3U481]	7.09755	8.326	5.29238	4.0925	4.09056	4.27864	1.28246	2.1596	1.52356	2.03727
ENSMUSG00000075420	3.03545	8.81677e-05	0.00145715	up	11:+:115912017-115913920	11:+:115912017-115913920	ENSMUSG00000075420	68528	Q3U0I6	Smim6	small integral membrane protein 6	4.30978	3.98634	2.85812	1.37927	2.95271	3.53888	0.1594	0.5158	0.06444	0.51299
ENSMUSG00000030681	1.00488	7.12597e-05	0.0012504	up	7:-:126986860-127014621	7:-:126986860-127014621	ENSMUSG00000030681	78388	Q3U7S9	Mvp	major vault protein [Source:MGI Symbol;Acc:MGI:1925638]	12.5908	13.7616	11.2255	8.01773	7.69077	8.03064	4.57861	4.43971	3.02424	4.37438
ENSMUSG00000060981	-1.54587073826033	9.98776e-05	0.00158317	down	13:+:23531050-23531519	13:+:23531050-23531519	ENSMUSG00000060981	69386	B2RTM0	Hist1h4h	Histone H4 [Source:UniProtKB/Swiss-Prot;Acc:P62806]	9.94043	8.40272	16.4102	11.7536	6.78418	4.68611	25.4301	24.4179	13.2748	14.1438
ENSMUSG00000073412	2.89377	0.000114312	0.00174725	up	17:-:35185095-35188439	17:-:35185095-35188439	ENSMUSG00000073412	16988	B8JJ61	Lst1	leukocyte specific transcript 1	32.6722	38.3093	19.3334	9.59648	13.9169	14.2788	1.25219	2.43112	1.21487	2.72009
ENSMUSG00000026819	-2.32014398880757	6.96179e-05	0.00122673	down	2:-:32414487-32451445	2:-:32414487-32451445	ENSMUSG00000026819	227731	A2ASZ8	Slc25a25	Calcium-binding mitochondrial carrier protein SCaMC-2 [Source:UniProtKB/Swiss-Prot;Acc:A2ASZ8]	2.48681	2.3313	2.25832	6.55254	6.75689	7.11693	7.03939	19.3615	24.0479	22.6699
ENSMUSG00000026981	6.37014	7.94002e-05	0.00135114	up	2:+:24336853-24351494	2:+:24336853-24351494	ENSMUSG00000026981	16181	Q542C7	Il1rn	Interleukin-1 receptor antagonist protein [Source:UniProtKB/Swiss-Prot;Acc:P25085]	3.12862	5.827	4.46094	2.29782	1.32605	2.0938	0.00939	0.07975	0	0.07931
ENSMUSG00000056413	1.4565	0.000111294	0.00171454	up	5:-:139271876-139325622	5:-:139271876-139325622	ENSMUSG00000056413	231821	E9PY16	Adap1	ArfGAP with dual PH domains 1 [Source:MGI Symbol;Acc:MGI:2442201]	3.51715	3.93734	2.51585	2.02928	2.37576	2.69208	0.55249	0.65126	0.4786	1.40971
ENSMUSG00000078780	4.61144	7.87618e-05	0.00134418	up	3:-:15946870-16006437	3:-:15946870-16006437	ENSMUSG00000078780	381484	Q1AN92	Gm5150	predicted gene 5150	2.34446	3.21405	2.68847	0.63546	2.03349	0.60524	0	0.15595	0.05196	0
ENSMUSG00000044676	-1.46700714362762	9.38071e-05	0.00151949	down	8:+:110079746-110092741	8:+:110079746-110092741	ENSMUSG00000044676	234725	G5E8C8	Zfp612	zinc finger protein 612 [Source:MGI Symbol;Acc:MGI:2443465]	0.97675	0.7075	1.01264	1.86906	2.21539	1.18966	2.14424	2.08359	2.88016	3.07225
ENSMUSG00000022759	-1.6761596972938	0.000116885	0.00177484	down	16:-:17544465-17561247	16:-:17544465-17561247	ENSMUSG00000022759	74685	Q14BP6	Lrrc74b	Leucine-rich repeat-containing protein 74B [Source:UniProtKB/Swiss-Prot;Acc:Q14BP6]	0.70563	0.61276	0.88168	1.0365	1.02472	0.39959	2.60878	1.27188	1.04518	1.93958
ENSMUSG00000105960	-1.26561549001865	0.000112023	0.00172487	down	3:+:129753758-129763884	3:+:129753758-129763884	ENSMUSG00000105960	319224	-	6330410L21Rik	RIKEN cDNA 6330410L21 gene	0.64282	0.49703	0.54826	0.76331	1.24333	0.98892	1.32902	1.14027	1.22103	1.24746
ENSMUSG00000024885	1.24258	9.5314e-05	0.00153964	up	19:-:3913493-3929761	19:-:3913493-3929761	ENSMUSG00000024885	67689	Q3TX25	Aldh3b1	aldehyde dehydrogenase 3 family, member B1	15.0858	16.4722	11.8711	8.22202	8.50283	8.3624	2.88237	4.43922	2.42003	4.28122
ENSMUSG00000078763	4.56937	7.83661e-05	0.00134073	up	11:+:83116849-83122670	11:+:83116849-83122670	ENSMUSG00000078763	20555	Q9Z0I7	Slfn1	schlafen 1 [Source:MGI Symbol;Acc:MGI:1313259]	1.68912	2.25453	3.97114	2.20548	4.6154	1.60358	0.02788	0.40595	0	0.13458
ENSMUSG00000036526	2.31148	0.00011898	0.00179982	up	5:-:140872990-141000582	5:-:140872990-141000582	ENSMUSG00000036526	108723	Q8CIS0	Card11	Caspase recruitment domain-containing protein 11 [Source:UniProtKB/Swiss-Prot;Acc:Q8CIS0]	1.02275	0.93647	0.86166	0.71284	1.86691	0.51729	0.11747	0.12959	0.06476	0.2191
ENSMUSG00000084940	-1.25663865442017	0.000122411	0.00183851	down	14:+:21741543-21746632	14:+:21741543-21746632	ENSMUSG00000084940	-	-	Gm15935	predicted gene 15935 [Source:MGI Symbol;Acc:MGI:3801894]	1.93349	0.96387	1.21729	1.79828	2.08848	1.35063	2.61866	2.68328	2.04662	2.66864
ENSMUSG00000028487	1.06115	0.000110777	0.00171018	up	4:-:84275095-84675275	4:-:84275095-84675275	ENSMUSG00000028487	242509	Q2TBA4	Bnc2	Zinc finger protein basonuclin-2 [Source:UniProtKB/Swiss-Prot;Acc:Q8BMQ3]	1.55939	1.10877	1.31721	1.28878	1.20706	1.02647	0.29244	0.38572	0.42405	0.60611
ENSMUSG00000036362	1.71707	0.000122509	0.00183851	up	3:-:59207892-59210882	3:-:59207892-59210882	ENSMUSG00000036362	74191	Q9D8I2	P2ry13	P2Y purinoceptor 13 [Source:UniProtKB/Swiss-Prot;Acc:Q9D8I2]	1.44634	1.54219	1.26952	1.3721	2.57019	1.30685	0.24667	0.34921	0.17451	0.64499
ENSMUSG00000021573	-1.36332314226033	9.09452e-05	0.00149211	down	13:+:74009407-74035753	13:+:74009407-74035753	ENSMUSG00000021573	72948	Q3URG1	Tppp	tubulin polymerization promoting protein [Source:MGI Symbol;Acc:MGI:1920198]	1.34372	1.71684	2.09003	3.71407	2.62956	2.48735	3.61581	3.97969	3.53277	6.5024
ENSMUSG00000052942	1.36364	0.000114676	0.0017519	up	19:-:28258851-28680077	19:-:28258851-28680077	ENSMUSG00000052942	226075	Q0GE24	Glis3	Zinc finger protein GLIS3 [Source:UniProtKB/Swiss-Prot;Acc:Q6XP49]	1.27502	1.94121	1.35234	0.8645	1.18391	0.85996	0.23509	0.51347	0.26372	0.34754
ENSMUSG00000028583	1.05691	8.48256e-05	0.0014155	up	4:-:143267431-143299564	4:-:143267431-143299564	ENSMUSG00000028583	14726	Q62011	Pdpn	Podoplanin [Source:UniProtKB/Swiss-Prot;Acc:Q62011]	26.4673	38.8167	31.3944	20.3981	18.9391	21.4723	9.15194	10.6194	9.88507	9.11187
ENSMUSG00000115575	-3.16594679001653	8.68626e-05	0.0014421	down	14:+:34661707-34662704	14:+:34661707-34662704	ENSMUSG00000115575	-	-	AC154276.3	-	0.05088	0.05073	0.05187	0.06436	0.18085	0.52545	0.57277	1.1373	0.31574	0.94258
ENSMUSG00000028859	3.00448	0.000123576	0.00184834	up	4:+:126024550-126044440	4:+:126024550-126044440	ENSMUSG00000028859	12986	P40223	Csf3r	Granulocyte colony-stimulating factor receptor [Source:UniProtKB/Swiss-Prot;Acc:P40223]	5.48773	6.64989	8.40497	2.2604	4.33417	3.54539	0.24478	1.31041	0.12224	0.79934
ENSMUSG00000068614	-1.55241852462351	5.69336e-05	0.00107442	down	2:-:114047282-114053548	2:-:114047282-114053548	ENSMUSG00000068614	11464	P68033	Actc1	Actin, alpha cardiac muscle 1 [Source:UniProtKB/Swiss-Prot;Acc:P68033]	913.586	668.758	441.015	801.859	1146.64	1026.11	2526.19	3419.54	4451.83	1624.49
ENSMUSG00000089679	-1.684747724116	0.000127203	0.00188813	down	19:-:53819354-53825128	19:-:53819354-53825128	ENSMUSG00000089679	102641509	-	Gm16299	predicted gene 16299	0.34883	0.27458	0.80471	1.06825	0.78301	0.51189	1.27754	1.00308	1.13922	1.63245
ENSMUSG00000026582	3.30403	7.88186e-05	0.00134437	up	1:+:164048234-164057677	1:+:164048234-164057677	ENSMUSG00000026582	20339	Q3U5F6	Sele	selectin, endothelial cell [Source:MGI Symbol;Acc:MGI:98278]	0.36622	0.41729	0.85325	0.59558	0.59914	0.52224	0.03569	0.06496	0	0.08614
ENSMUSG00000031266	1.46958	0.000113878	0.00174427	up	X:-:134588149-134601125	X:-:134588149-134601125	ENSMUSG00000031266	11605	Q8BGZ6	Gla	galactosidase, alpha [Source:MGI Symbol;Acc:MGI:1347344]	4.68165	7.47458	5.58065	2.97072	3.33514	3.37285	1.16187	1.40985	0.81069	1.09484
ENSMUSG00000039232	1.12258	0.000121125	0.00182467	up	10:-:12938209-12964298	10:-:12938209-12964298	ENSMUSG00000039232	74732	Q3U5V8	Stx11	syntaxin 11	2.50957	2.7427	1.94314	1.7703	1.64376	1.85639	0.60497	0.5693	0.52406	0.92379
ENSMUSG00000030707	2.41405	9.22621e-05	0.00150398	up	7:-:126699773-126707787	7:-:126699773-126707787	ENSMUSG00000030707	12721	O89053	Coro1a	Coronin-1A [Source:UniProtKB/Swiss-Prot;Acc:O89053]	35.619	49.2309	43.3379	14.4949	28.0379	12.7567	3.3424	7.99826	2.106	4.37167
ENSMUSG00000070605	1.47488	0.000127977	0.00189482	up	4:+:146449023-146470292	4:+:146449023-146470292	ENSMUSG00000070605	433791	B1ASD8	Zfp992	zinc finger protein 992	1.19423	2.05865	1.53585	1.42586	1.52057	1.83251	0.27411	0.49891	0.60944	0.28945
ENSMUSG00000048349	-1.20791164786779	0.000125918	0.0018764	down	14:-:104461676-104467999	14:-:104461676-104467999	ENSMUSG00000048349	18996	P17208	Pou4f1	POU domain, class 4, transcription factor 1 [Source:UniProtKB/Swiss-Prot;Acc:P17208]	0.73913	0.45517	0.50966	0.74244	0.64385	0.4602	0.94544	0.70183	1.09263	0.99332
ENSMUSG00000091937	-2.01566030887493	0.000107836	0.00167627	down	1:-:39804148-39805332	1:-:39804148-39805332	ENSMUSG00000091937	100042065	F6S692	Gm3646	predicted gene 3646	0.86561	0.57536	0.58822	1.09491	1.53822	0.44693	2.06682	2.86623	1.43231	3.91957
ENSMUSG00000059741	-1.93666948814524	7.68322e-05	0.00132243	down	9:+:110741861-110769798	9:+:110741861-110769798	ENSMUSG00000059741	17897	P09542	Myl3	Myosin light chain 3 [Source:UniProtKB/Swiss-Prot;Acc:P09542]	18.5342	35.4967	49.6111	12.6646	17.6599	12.7764	54.254	104.118	43.1038	103.612
ENSMUSG00000004609	1.05918	0.000100656	0.00159341	up	7:-:43524216-43544428	7:-:43524216-43544428	ENSMUSG00000004609	12489	Q63994	Cd33	Myeloid cell surface antigen CD33 [Source:UniProtKB/Swiss-Prot;Acc:Q63994]	3.50924	3.6617	3.72357	2.39712	3.80123	2.31461	0.90277	1.45248	0.77855	1.63824
ENSMUSG00000087429	3.00082	7.31522e-05	0.00127468	up	10:-:88444236-88449887	10:-:88444236-88449887	ENSMUSG00000087429	-	-	Gm16235	predicted gene 16235 [Source:MGI Symbol;Acc:MGI:3801878]	0.63478	0.84386	0.86273	0.13382	0.62668	0.32775	0	0	0	0
ENSMUSG00000097141	-1.02283437044018	0.000110024	0.00170214	down	18:+:82692284-82694176	18:+:82692284-82694176	ENSMUSG00000097141	100038564	Q3UHB9	Gm10524	predicted gene 10524	3.78254	2.48746	3.80093	3.66473	3.87729	4.04449	4.33735	4.53025	6.49193	5.89696
ENSMUSG00000026648	1.03022	0.00010487	0.00164148	up	2:+:3424131-3464130	2:+:3424131-3464130	ENSMUSG00000026648	227525	Q8K4J0	Dclre1c	Protein artemis [Source:UniProtKB/Swiss-Prot;Acc:Q8K4J0]	2.49116	2.22832	1.86696	2.17195	3.17082	2.24034	0.55781	1.00853	0.72384	1.22518
ENSMUSG00000087591	4.84871	9.54449e-05	0.00154028	up	X:-:12339782-12354996	X:-:12339782-12354996	ENSMUSG00000087591	100043946	-	Gm14635	predicted gene 14635	3.17785	1.50578	0.99422	0.39798	0.82005	2.79419	0.0322	0	0.07809	0
ENSMUSG00000020098	1.93449	0.000134909	0.00196271	up	10:+:61089331-61094324	10:+:61089331-61094324	ENSMUSG00000020098	13180	P61458	Pcbd1	pterin 4 alpha carbinolamine dehydratase/dimerization cofactor of hepatocyte nuclear factor 1 alpha (TCF1) 1	13.9854	9.29592	5.89232	7.94086	7.95281	13.7358	2.54423	1.2349	1.38848	1.68873
ENSMUSG00000040659	1.3571	8.28265e-05	0.00139206	up	4:-:141858142-141874920	4:-:141858142-141874920	ENSMUSG00000040659	27984	Q8C845	Efhd2	EF-hand domain family member D2 [Source:HGNC Symbol;Acc:HGNC:28670]	58.8661	78.9353	59.7206	32.994	34.7426	35.0406	16.3689	19.7831	12.3608	13.6699
ENSMUSG00000028701	-1.08246924195621	0.000111059	0.00171199	down	4:-:116132406-116151338	4:-:116132406-116151338	ENSMUSG00000028701	68075	Q9D6I9	Lurap1	leucine rich adaptor protein 1 [Source:MGI Symbol;Acc:MGI:1915325]	1.07846	0.92902	1.18724	1.80066	1.19587	1.6393	2.08358	1.68195	1.93797	2.09896
ENSMUSG00000020326	-1.03667640440887	6.65743e-05	0.00119029	down	11:-:40748552-40755311	11:-:40748552-40755311	ENSMUSG00000020326	12450	Q5D0F7	Ccng1	Cyclin-G1 [Source:UniProtKB/Swiss-Prot;Acc:P51945]	103.257	102.561	100.535	148.259	163.594	190.109	209.092	263.773	297.792	228.371
ENSMUSG00000083820	-1.17386264017642	0.000135438	0.00196734	down	7:-:81161397-81161744	7:-:81161397-81161744	ENSMUSG00000083820	623286	-	Gm6415	predicted pseudogene 6415 [Source:MGI Symbol;Acc:MGI:3648526]	5.25338	5.38326	6.24734	6.27579	10.1998	8.43859	9.25829	9.42232	10.1414	14.0564
ENSMUSG00000042793	-1.66877893794585	0.000138421	0.00200214	down	1:-:134983301-135105276	1:-:134983301-135105276	ENSMUSG00000042793	329252	Q3UVD5	Lgr6	Leucine-rich repeat-containing G-protein coupled receptor 6 [Source:UniProtKB/Swiss-Prot;Acc:Q3UVD5]	0.2372	0.26606	0.43823	0.17814	0.24588	0.21432	0.70542	1.01245	0.35876	0.38446
ENSMUSG00000050821	-1.00386688925234	9.1107e-05	0.00149226	down	16:+:20693282-20703048	16:+:20693282-20703048	ENSMUSG00000050821	78408	Q8BWU3	Fam131a	Protein FAM131A [Source:UniProtKB/Swiss-Prot;Acc:Q8BWU3]	7.81409	6.26464	8.47306	11.0322	11.9564	9.3741	16.8484	12.7529	14.2478	13.101
ENSMUSG00000086554	3.22181	8.40827e-05	0.00140711	up	4:+:117975036-117993972	4:+:117975036-117993972	ENSMUSG00000086554	78615	-	9530034E10Rik	RIKEN cDNA 9530034E10 gene [Source:MGI Symbol;Acc:MGI:1925865]	0.5058	2.11806	0.20623	0.51183	1.07859	0.20892	0	0	0	0
ENSMUSG00000029403	-1.04166898026804	0.000122882	0.00184267	down	5:-:92006074-92043883	5:-:92006074-92043883	ENSMUSG00000029403	53886	Q9QUK0	Cdkl2	Cyclin-dependent kinase-like 2 [Source:UniProtKB/Swiss-Prot;Acc:Q9QUK0]	0.7537	0.71806	0.63168	1.0275	1.05164	1.21068	1.41398	1.19584	1.13281	1.30308
ENSMUSG00000024030	1.08808	0.000108037	0.0016785	up	17:+:31057698-31115777	17:+:31057698-31115777	ENSMUSG00000024030	11307	Q64343	Abcg1	ATP binding cassette subfamily G member 1 [Source:MGI Symbol;Acc:MGI:107704]	5.54538	5.2923	4.58311	6.44557	7.54609	7.80278	1.80206	1.93855	1.95296	2.89967
ENSMUSG00000024033	-1.90814808273902	0.000141668	0.00203079	down	17:-:31255019-31277356	17:-:31255019-31277356	ENSMUSG00000024033	22092	Q8VIG3	Rsph1	radial spoke head 1 homolog (Chlamydomonas)	1.43971	2.2184	1.37859	1.10369	0.93033	0.85598	5.89304	3.68375	2.92368	1.93958
ENSMUSG00000106574	-1.14769507409836	0.000140647	0.0020201	down	3:+:139649379-139650377	3:+:139649379-139650377	ENSMUSG00000106574	100039840	-	Gm2451	predicted pseudogene 2451 [Source:MGI Symbol;Acc:MGI:3780618]	1.62667	1.36843	2.27988	2.25046	2.83042	2.36215	2.60089	4.22905	2.9019	3.1388
ENSMUSG00000104453	-1.17908929107992	9.63379e-05	0.00154934	down	7:-:81530309-81532521	7:-:81530309-81532521	ENSMUSG00000104453	-	-	Gm37829	predicted gene, 37829 [Source:MGI Symbol;Acc:MGI:5611057]	7.29728	6.063	8.44405	8.85293	12.5869	9.81025	13.056	11.882	21.2445	16.4647
ENSMUSG00000039981	3.10494	0.000131398	0.00192599	up	10:+:7832470-7870396	10:+:7832470-7870396	ENSMUSG00000039981	237256	Q8BIY3	Zc3h12d	zinc finger CCCH type containing 12D	1.41477	1.93024	1.3662	0.58081	1.3379	0.57668	0.15239	0.13869	0.0462	0.04598
ENSMUSG00000024675	3.75394	0.000105946	0.00165303	up	19:+:11404770-11427246	19:+:11404770-11427246	ENSMUSG00000024675	64380	Q9D3F6	Ms4a4c	membrane-spanning 4-domains, subfamily A, member 4C [Source:MGI Symbol;Acc:MGI:1927656]	2.63919	1.21447	1.74418	1.6508	2.95482	2.57557	0.17807	0.25208	0	0.17908
ENSMUSG00000079560	-1.07212748069429	0.000134803	0.00196215	down	6:-:52169062-52213336	6:-:52169062-52213336	ENSMUSG00000079560	15400	P02831	Hoxa3	Homeobox protein Hox-A3 [Source:UniProtKB/Swiss-Prot;Acc:P02831]	0.69241	0.44621	0.38732	0.71562	0.73026	0.68013	0.71719	0.97511	0.94312	0.85508
ENSMUSG00000087279	-1.32271287702479	0.000141317	0.00202675	down	11:+:70615848-70616890	11:+:70615848-70616890	ENSMUSG00000087279	668433	J3QJW4	4930544D05Rik	RIKEN cDNA 4930544D05 gene [Source:MGI Symbol;Acc:MGI:2148639]	2.1184	2.93347	3.53888	3.34942	3.13705	2.06599	6.20218	4.2379	5.69605	3.77878
ENSMUSG00000018654	1.62057	0.000123194	0.00184357	up	11:+:11685003-11772926	11:+:11685003-11772926	ENSMUSG00000018654	22778	Q8C5P6	Ikzf1	IKAROS family zinc finger 1 [Source:MGI Symbol;Acc:MGI:1342540]	3.75354	3.75115	3.79917	2.96878	5.09244	2.16949	0.70163	1.51721	0.32727	1.18327
ENSMUSG00000024978	-1.05885845152991	8.02694e-05	0.00136162	down	19:-:55069734-55099451	19:-:55069734-55099451	ENSMUSG00000024978	14732	Q61586	Gpam	glycerol-3-phosphate acyltransferase, mitochondrial [Source:MGI Symbol;Acc:MGI:109162]	26.0539	17.2428	36.8911	38.5038	35.1361	31.338	59.7228	54.3193	57.2819	53.7939
ENSMUSG00000031662	1.77312	0.000146747	0.0020913	up	8:-:88626563-88636128	8:-:88626563-88636128	ENSMUSG00000031662	71607	Q9D2Y5	Snx20	sorting nexin 20 [Source:HGNC Symbol;Acc:HGNC:30390]	1.50637	2.35113	1.41488	0.72824	1.10251	1.05873	0.25826	0.37213	0.24469	0.19479
ENSMUSG00000010142	2.27939	0.000149508	0.00211829	up	11:+:61126755-61149372	11:+:61126755-61149372	ENSMUSG00000010142	57916	A5D8Y6	Tnfrsf13b	tumor necrosis factor receptor superfamily, member 13b [Source:MGI Symbol;Acc:MGI:1889411]	4.78102	5.42738	4.10678	2.03847	3.9245	2.10795	0.67798	1.04502	0.17778	0.48649
ENSMUSG00000006519	1.57565	0.000102815	0.00161961	up	8:-:122424776-122432930	8:-:122424776-122432930	ENSMUSG00000006519	13057	B3VQI8	Cyba	Cytochrome b-245 light chain [Source:UniProtKB/Swiss-Prot;Acc:Q61462]	80.9394	102.774	71.0443	36.5994	45.6857	44.4653	18.1556	24.2154	11.2214	12.7961
ENSMUSG00000092397	-4.54008841853024	0.000155692	0.00218686	down	2:+:114054335-114064868	2:+:114054335-114064868	ENSMUSG00000092397	100303644	-	C130080G10Rik	RIKEN cDNA C130080G10 gene	0.45166	0.21537	0	0.42227	0.46529	0.77058	1.48704	8.60756	6.82369	3.10413
ENSMUSG00000022123	3.34068	9.93712e-05	0.00157905	up	14:+:103513342-103612797	14:+:103513342-103612797	ENSMUSG00000022123	64929	Q14DU0	Scel	sciellin	0.64924	0.70799	0.31021	0.30796	0.69704	0.67043	0.08305	0.05039	0	0.02506
ENSMUSG00000072852	-1.8683335742005	0.000149429	0.00211819	down	5:+:76928368-76947758	5:+:76928368-76947758	ENSMUSG00000072852	70284	Q9D719	2310040G07Rik	RIKEN cDNA 2310040G07 gene [Source:MGI Symbol;Acc:MGI:1917534]	0.321	0.57609	0.52353	0.56845	1.59721	0.92814	1.51102	1.67408	2.23085	1.66495
ENSMUSG00000044092	2.0948	0.000147221	0.00209514	up	5:+:139405280-139415623	5:+:139405280-139415623	ENSMUSG00000044092	319772	Q497Y9	C130050O18Rik	RIKEN cDNA C130050O18 gene [Source:MGI Symbol;Acc:MGI:2442694]	1.1498	1.05085	1.15573	0.60599	0.54864	0.6926	0.14707	0.19829	0.07927	0.11833
ENSMUSG00000038205	-1.01791731663567	8.62113e-05	0.00143297	down	3:+:97658193-97673812	3:+:97658193-97673812	ENSMUSG00000038205	108097	Q6PAM0	Prkab2	protein kinase, AMP-activated, beta 2 non-catalytic subunit [Source:MGI Symbol;Acc:MGI:1336185]	14.7784	11.5153	16.4149	21.8191	23.3634	19.1298	33.9369	27.4576	35.2456	27.6524
ENSMUSG00000027452	-1.19021363787753	9.85471e-05	0.00157278	down	2:-:150618105-150668500	2:-:150618105-150668500	ENSMUSG00000027452	68738	Q569W4	Acss1	Acetyl-coenzyme A synthetase 2-like, mitochondrial [Source:UniProtKB/Swiss-Prot;Acc:Q99NB1]	5.94187	6.52522	12.1384	7.57805	7.70966	4.70027	17.5234	14.6339	9.08379	12.5183
ENSMUSG00000095028	2.77654	0.000117473	0.00178183	up	3:-:15495751-15575065	3:-:15495751-15575065	ENSMUSG00000095028	668101	Q3U390	Sirpb1b	signal-regulatory protein beta 1B	0.759	0.95034	0.95359	0.31258	0.66916	0.47391	0.05419	0.10959	0.04381	0.0436
ENSMUSG00000020573	1.04518	0.000133041	0.00194132	up	12:-:32173473-32208659	12:-:32173473-32208659	ENSMUSG00000020573	30955	Q9JHG7	Pik3cg	Phosphatidylinositol 4,5-bisphosphate 3-kinase catalytic subunit gamma isoform [Source:UniProtKB/Swiss-Prot;Acc:Q9JHG7]	2.13352	2.2714	1.89215	1.34171	2.0706	1.18248	0.54889	0.78578	0.46372	0.68474
ENSMUSG00000110547	-1.18283922423935	9.90363e-05	0.00157705	down	8:+:123896273-123900620	8:+:123896273-123900620	ENSMUSG00000110547	101056072	-	Gm29773	predicted gene, 29773 [Source:MGI Symbol;Acc:MGI:5588932]	13.0239	11.0882	15.3242	20.3381	24.9536	17.9873	30.3294	22.9601	30.5297	39.2826
ENSMUSG00000114019	-1.14962214821019	0.000158757	0.00221504	down	13:+:93410783-93412957	13:+:93410783-93412957	ENSMUSG00000114019	-	-	Gm47155	predicted gene, 47155 [Source:MGI Symbol;Acc:MGI:6095924]	1.07402	0.83804	1.14237	0.73833	1.13408	0.55454	1.43354	1.4206	1.04312	1.58585
ENSMUSG00000070577	-1.23602417434026	0.00014209	0.00203484	down	4:+:148643317-148671572	4:+:148643317-148671572	ENSMUSG00000070577	230909	B1ARY8	Gm572	predicted gene 572	3.70328	2.22999	4.85869	3.7103	3.51847	2.15817	6.97881	4.32522	5.23284	5.20723
ENSMUSG00000037411	1.68651	0.000135031	0.00196352	up	5:-:137061504-137072268	5:-:137061504-137072268	ENSMUSG00000037411	18787	G5E899	Serpine1	serine (or cysteine) peptidase inhibitor, clade E, member 1 [Source:MGI Symbol;Acc:MGI:97608]	5.67309	10.1237	6.33023	3.72878	4.15978	4.03175	0.79102	1.95223	0.69916	1.9254
ENSMUSG00000073209	1.17493	0.000148953	0.00211348	up	6:-:30956023-30959078	6:-:30956023-30959078	ENSMUSG00000073209	619665	Q19A41	Klf14	Krueppel-like factor 14 [Source:UniProtKB/Swiss-Prot;Acc:Q19A41]	4.0214	4.05916	2.76096	2.69045	2.26393	3.68932	1.02027	1.25867	0.72178	0.9645
ENSMUSG00000051910	-1.20283826984255	9.04333e-05	0.00148705	down	7:-:115470872-116038796	7:-:115470872-116038796	ENSMUSG00000051910	20679	P40645	Sox6	SRY (sex determining region Y)-box 6 [Source:MGI Symbol;Acc:MGI:98368]	4.71123	2.8436	4.58237	6.69109	7.03345	6.28627	9.14798	9.62097	11.9993	10.3253
ENSMUSG00000070443	-1.4002511847655	0.000161444	0.00223663	down	3:+:78917258-78918256	3:+:78917258-78918256	ENSMUSG00000070443	100041748	-	Gm10291	predicted pseudogene 10291 [Source:MGI Symbol;Acc:MGI:3641638]	0.66084	0.76024	0.88086	0.83588	0.60222	0.57742	1.56054	1.38864	1.13552	1.25552
ENSMUSG00000050919	-1.01710101425247	0.00011059	0.0017082	down	13:+:99184823-99250656	13:+:99184823-99250656	ENSMUSG00000050919	238803	Q6NS86	Zfp366	zinc finger protein 366 [Source:MGI Symbol;Acc:MGI:2178429]	2.28371	2.15792	2.77392	4.19708	3.68586	3.39355	4.10385	5.19712	4.84858	4.53987
ENSMUSG00000025511	1.01293	0.000109152	0.00169133	up	7:+:141475240-141493427	7:+:141475240-141493427	ENSMUSG00000025511	64540	Q4FJW7	Tspan4	tetraspanin 4 [Source:MGI Symbol;Acc:MGI:1928097]	26.0675	33.1733	22.2693	18.2558	17.8441	17.3114	8.94729	11.5807	6.30795	8.23506
ENSMUSG00000005413	1.28396	0.000108294	0.0016807	up	8:+:75093621-75100589	8:+:75093621-75100589	ENSMUSG00000005413	15368	P14901	Hmox1	Heme oxygenase 1 [Source:UniProtKB/Swiss-Prot;Acc:P14901]	30.9162	60.0873	36.9825	27.9169	25.6657	25.2765	9.4969	14.981	7.23435	12.9294
ENSMUSG00000074807	-1.03261695102912	0.00013655	0.00197872	down	2:-:128966593-128967725	2:-:128966593-128967725	ENSMUSG00000074807	-	Q9CZN6	Gm10762	-	4.93035	5.27321	6.71603	5.27256	5.94713	6.80375	10.3198	6.1777	7.67607	10.4061
ENSMUSG00000071342	-1.35349040850545	0.000123089	0.00184296	down	12:-:40175493-40199490	12:-:40175493-40199490	ENSMUSG00000071342	380755	B2RVW5	Lsmem1	leucine-rich single-pass membrane protein 1	3.29497	3.01882	3.65364	6.39247	5.82889	6.16128	12.3023	7.68517	6.4928	8.55054
ENSMUSG00000024659	1.20945	9.61772e-05	0.00154846	up	19:-:20373428-20390944	19:-:20373428-20390944	ENSMUSG00000024659	16952	P10107	Anxa1	Annexin A1 [Source:UniProtKB/Swiss-Prot;Acc:P10107]	58.182	86.1206	63.3748	44.777	45.075	37.3392	13.9678	30.102	15.6346	23.4212
ENSMUSG00000004709	2.54399	0.000151027	0.00213774	up	1:+:171559193-171609746	1:+:171559193-171609746	ENSMUSG00000004709	18106	Q07763	Cd244	Natural killer cell receptor 2B4 [Source:UniProtKB/Swiss-Prot;Acc:Q07763]	0.4895	0.86186	0.74312	0.31617	0.54289	0.48396	0.02131	0.12932	0.03877	0.14148
ENSMUSG00000036198	2.2099	0.000112614	0.00172942	up	X:+:49463945-49500244	X:+:49463945-49500244	ENSMUSG00000036198	75404	B1AUC7	Arhgap36	Mus musculus Rho GTPase activating protein 36 (Arhgap36), transcript variant 2, mRNA. [Source:RefSeq mRNA;Acc:NM_001356394]	17.7094	14.1491	16.9015	43.9934	49.8562	26.7488	3.66085	3.1888	4.29232	6.70944
ENSMUSG00000000386	4.31797	0.000158402	0.00221324	up	16:-:97447035-97462907	16:-:97447035-97462907	ENSMUSG00000000386	17857	Q4FJJ9	Mx1	MX dynamin-like GTPase 1 [Source:MGI Symbol;Acc:MGI:97243]	2.82745	1.01375	2.37096	5.25011	4.00967	1.82662	0.04276	0.17295	0.05186	0.1204
ENSMUSG00000031444	5.56249	0.000126199	0.00187893	up	8:+:13037308-13056676	8:+:13037308-13056676	ENSMUSG00000031444	14058	O88947	F10	Coagulation factor X Factor X light chain Factor X heavy chain Activated factor Xa heavy chain [Source:UniProtKB/Swiss-Prot;Acc:O88947]	1.76651	3.96748	5.06075	1.43475	1.25566	1.22891	0	0.2078	0	0.06889
ENSMUSG00000050064	1.1169	0.000159645	0.00222064	up	3:+:98382461-98753812	3:+:98382461-98753812	ENSMUSG00000050064	242109	Q569E7	Zfp697	zinc finger protein 697 [Source:MGI Symbol;Acc:MGI:2139736]	1.2395	1.29088	0.91318	0.76839	0.86506	1.07085	0.33279	0.31239	0.36552	0.28038
ENSMUSG00000098192	-1.41300432503974	0.000173116	0.00234934	down	14:+:48408618-48409618	14:+:48408618-48409618	ENSMUSG00000098192	100041831	-	Gm3534	predicted pseudogene 3534 [Source:MGI Symbol;Acc:MGI:3781711]	0.86244	1.51744	1.08595	0.77004	1.26213	0.57626	2.02464	1.95282	1.44805	1.81686
ENSMUSG00000037991	-1.88033106928377	0.000172583	0.00234537	down	16:+:10835059-10892966	16:+:10835059-10892966	ENSMUSG00000037991	223970	Q3UPE3	Rmi2	RecQ-mediated genome instability protein 2 [Source:UniProtKB/Swiss-Prot;Acc:Q3UPE3]	0.33893	0.33792	0.2879	0.35726	0.22753	0.26832	0.67053	1.02406	1.40204	0.41855
ENSMUSG00000102813	1.19762	0.000174776	0.0023631	up	4:+:150068539-150070997	4:+:150068539-150070997	ENSMUSG00000102813	-	-	Gm37795	predicted gene, 37795 [Source:MGI Symbol;Acc:MGI:5611023]	1.7141	1.709	1.85246	1.48897	1.44349	1.38617	0.29586	0.51287	0.46132	0.7141
ENSMUSG00000041773	1.035	0.00012471	0.00186173	up	13:+:97241105-97253034	13:+:97241105-97253034	ENSMUSG00000041773	13803	O35709	Enc1	ectodermal-neural cortex 1	8.88723	7.74921	4.81904	4.99014	5.49925	7.38386	2.96196	2.38278	1.95571	2.25063
ENSMUSG00000090150	-1.07663797639588	0.000114045	0.00174591	down	9:+:104063377-104127725	9:+:104063377-104127725	ENSMUSG00000090150	102632	A0A0R4J0I6	Acad11	acyl-Coenzyme A dehydrogenase family, member 11 [Source:MGI Symbol;Acc:MGI:2143169]	1.94361	1.56577	1.48983	2.96326	2.93501	2.39774	3.24057	4.2347	3.49263	3.08509
ENSMUSG00000029082	2.77033	0.000174751	0.0023631	up	5:+:43818885-43843986	5:+:43818885-43843986	ENSMUSG00000029082	12182	Q64277	Bst1	bone marrow stromal cell antigen 1 [Source:HGNC Symbol;Acc:HGNC:1118]	2.69453	3.465	2.77779	1.10382	1.99511	1.0118	0.15667	0.38021	0.076	0.32141
ENSMUSG00000085614	-1.01286263065327	0.000140321	0.00201939	down	4:+:11966565-11994280	4:+:11966565-11994280	ENSMUSG00000085614	100503636	-	1700123M08Rik	RIKEN cDNA 1700123M08 gene [Source:MGI Symbol;Acc:MGI:1923915]	5.92464	4.58097	4.72446	5.96463	6.54138	7.4914	10.4757	6.65603	7.70264	9.20788
ENSMUSG00000081929	-1.34673309647046	0.00018028	0.00241744	down	11:+:116382750-116383205	11:+:116382750-116383205	ENSMUSG00000081929	668255	-	Rps11-ps2	ribosomal protein S11, pseudogene 2 [Source:MGI Symbol;Acc:MGI:3651796]	3.5637	1.77655	2.15682	2.39471	3.43026	2.41499	5.69801	4.01021	3.73154	4.81351
ENSMUSG00000024529	1.4576	9.64042e-05	0.00154956	up	18:-:52516069-52529867	18:-:52516069-52529867	ENSMUSG00000024529	16948	Q3TP83	Lox	lysyl oxidase	75.7622	97.0109	78.1728	35.5627	36.5472	43.6308	17.1455	24.8558	13.2463	19.1138
ENSMUSG00000035692	1.82867	0.000179528	0.00241067	up	4:-:156199424-156200818	4:-:156199424-156200818	ENSMUSG00000035692	100038882	Q4FJR9	Isg15	ISG15 ubiquitin-like modifier	11.8224	6.16154	10.0652	12.3201	10.6636	9.01743	2.95573	3.41976	1.08371	1.0784
ENSMUSG00000051984	-1.22577997753346	0.000133731	0.00195042	down	19:-:44516957-44545864	19:-:44516957-44545864	ENSMUSG00000051984	240667	Q3TZ89	Sec31b	Protein transport protein Sec31B [Source:UniProtKB/Swiss-Prot;Acc:Q3TZ89]	2.39128	1.65354	2.13607	4.11426	4.23416	2.44277	4.15727	4.75722	4.02062	5.69975
ENSMUSG00000080662	-1.36729549517071	0.000183283	0.00244008	down	18:+:10785446-10785567	18:+:10785446-10785567	ENSMUSG00000080662	100316783	-	Mir1b	microRNA 1b [Source:MGI Symbol;Acc:MGI:3783373]	17.4825	9.96035	15.6988	21.0605	21.6976	11.1757	39.6133	23.2588	20.6628	29.3004
ENSMUSG00000113252	-3.30546517961766	0.000142353	0.00203761	down	13:-:44010592-44018522	13:-:44010592-44018522	ENSMUSG00000113252	102636424	-	Gm33489	predicted gene, 33489 [Source:MGI Symbol;Acc:MGI:5592648]	0.37729	0	0.23074	0	0.26818	0.07792	1.0038	2.0613	0.84279	0.46592
ENSMUSG00000037095	1.88085	0.00015252	0.00215056	up	17:-:56119680-56121946	17:-:56119680-56121946	ENSMUSG00000037095	76905	Q91XL1	Lrg1	leucine-rich alpha-2-glycoprotein 1	15.2235	34.1418	11.188	21.2055	25.7835	14.6723	2.15403	6.76779	2.519	5.29186
ENSMUSG00000029664	1.3518	0.000176153	0.00237877	up	6:-:3962595-3988919	6:-:3962595-3988919	ENSMUSG00000029664	21789	O35536	Tfpi2	tissue factor pathway inhibitor 2 [Source:MGI Symbol;Acc:MGI:108543]	5.55208	8.98446	4.32599	4.85344	3.85695	5.31302	0.95186	2.09348	1.37082	1.5795
ENSMUSG00000031253	1.41456	0.000130215	0.001913	up	X:+:133908426-133932446	X:+:133908426-133932446	ENSMUSG00000031253	68792	Q8R054	Srpx2	Sushi repeat-containing protein SRPX2 [Source:UniProtKB/Swiss-Prot;Acc:Q8R054]	22.7323	23.6524	16.8117	10.5299	11.0358	14.7341	4.71285	7.96306	2.82541	4.29248
ENSMUSG00000087543	-1.11036595019852	0.000165189	0.0022723	down	15:+:79742698-79757394	15:+:79742698-79757394	ENSMUSG00000087543	100504191	-	Gm16576	predicted gene 16576	0.58263	0.76828	0.93872	1.18865	1.22461	0.88305	1.2501	1.14352	1.41111	1.76395
ENSMUSG00000082884	-1.64471232338999	0.000189091	0.00249335	down	2:-:22590024-22590533	2:-:22590024-22590533	ENSMUSG00000082884	-	-	Gm13339	predicted gene 13339 [Source:MGI Symbol;Acc:MGI:3650221]	3.48508	2.28339	3.14642	3.5266	3.53892	4.4214	13.9595	7.54212	4.69573	5.41054
ENSMUSG00000026398	-1.06027212680648	0.000170616	0.00232727	down	1:-:136842571-136960448	1:-:136842571-136960448	ENSMUSG00000026398	26424	P45448	Nr5a2	Nuclear receptor subfamily 5 group A member 2 [Source:UniProtKB/Swiss-Prot;Acc:P45448]	0.52513	0.68665	0.5967	1.12157	0.7343	0.9423	1.08354	1.12239	1.06834	1.00996
ENSMUSG00000025044	2.56302	0.000164336	0.00226376	up	8:-:39581685-39642673	8:-:39581685-39642673	ENSMUSG00000025044	20288	P30204	Msr1	Macrophage scavenger receptor types I and II [Source:UniProtKB/Swiss-Prot;Acc:P30204]	5.51533	11.0697	7.04978	2.54143	3.44241	2.47981	0.45872	0.65602	0.4967	0.71175
ENSMUSG00000043219	-1.09855363322611	0.000195795	0.00256297	down	6:-:52206288-52208722	6:-:52206288-52208722	ENSMUSG00000043219	15403	P09092	Hoxa6	Homeobox protein Hox-A6 [Source:UniProtKB/Swiss-Prot;Acc:P09092]	2.09173	2.25931	1.48065	1.76388	1.92737	1.26	2.19993	2.88591	2.66796	2.87017
ENSMUSG00000030317	-1.65079068139894	0.00015406	0.00216809	down	6:-:115241892-115252205	6:-:115241892-115252205	ENSMUSG00000030317	110595	Q9JHB3	Timp4	tissue inhibitor of metalloproteinase 4 [Source:MGI Symbol;Acc:MGI:109125]	0.92191	0.85904	0.53573	1.75462	1.83731	1.5659	2.97124	3.08117	1.34726	3.58574
ENSMUSG00000086534	-1.23924010743797	0.000200901	0.00260682	down	17:+:29890084-29897067	17:+:29890084-29897067	ENSMUSG00000086534	102640752	-	Gm16758	predicted gene, 16758 [Source:MGI Symbol;Acc:MGI:4439682]	0.34313	0.34211	0.28249	0.38394	0.31269	0.35432	0.62121	0.42606	0.49133	0.6845
ENSMUSG00000026365	1.3097	0.000116512	0.00177255	up	1:-:140084708-140183764	1:-:140084708-140183764	ENSMUSG00000026365	12628	P06909	Cfh	Complement factor H [Source:UniProtKB/Swiss-Prot;Acc:P06909]	13.4605	16.4766	12.8313	13.486	15.1068	11.4538	2.44859	10.245	3.53336	5.19181
ENSMUSG00000046532	-1.38490543752771	0.000139693	0.0020143	down	X:+:98148769-98323215	X:+:98148769-98323215	ENSMUSG00000046532	11835	P19091	Ar	Androgen receptor [Source:UniProtKB/Swiss-Prot;Acc:P19091]	0.80359	0.74577	1.02002	2.14797	1.68845	1.6805	2.15663	2.78636	2.43356	2.42789
ENSMUSG00000064357	-1.54275077087994	0.000112431	0.00172842	down	MT:+:7927-8607	MT:+:7927-8607	ENSMUSG00000064357	17705	Q7JCY9	mt-Atp6	mitochondrially encoded ATP synthase 6 [Source:MGI Symbol;Acc:MGI:99927]	69.5745	59.9997	63.9255	96.0216	75.5332	103.032	316.755	129.077	296.137	111.797
ENSMUSG00000021779	-1.63828061713184	0.000170058	0.00232399	down	14:+:17660261-18038090	14:+:17660261-18038090	ENSMUSG00000021779	21834	P37242	Thrb	Thyroid hormone receptor beta [Source:UniProtKB/Swiss-Prot;Acc:P37242]	0.46646	0.46508	0.26571	0.78091	1.08897	0.99879	0.85639	1.50765	1.59193	1.68579
ENSMUSG00000105769	2.61695	0.000117487	0.00178183	up	3:+:130874073-130876824	3:+:130874073-130876824	ENSMUSG00000105769	-	-	Gm43351	predicted gene 43351 [Source:MGI Symbol;Acc:MGI:5663488]	0.46733	0.77656	0.95271	0.59112	0.18454	0.64343	0	0	0	0
ENSMUSG00000086866	3.12433	0.000140229	0.00201939	up	8:+:61849006-61922834	8:+:61849006-61922834	ENSMUSG00000086866	75111	-	4930512H18Rik	RIKEN cDNA 4930512H18 gene [Source:MGI Symbol;Acc:MGI:1922361]	1.32394	0.88001	0.48197	0.59809	1.15767	1.72521	0.03226	0.03914	0.03912	0.19464
ENSMUSG00000079471	2.02582	0.000158258	0.00221229	up	17:-:45600971-45602102	17:-:45600971-45602102	ENSMUSG00000079471	653016	Q2Q5T5	Mymx	Protein myomixer [Source:UniProtKB/Swiss-Prot;Acc:Q2Q5T5]	59.1393	57.0901	33.4171	16.3244	20.8544	32.2196	7.33695	5.64874	4.23417	7.32773
ENSMUSG00000043263	2.91774	0.000207283	0.00266952	up	1:+:173630917-173647928	1:+:173630917-173647928	ENSMUSG00000043263	236312	Q8BV49	Ifi209	Pyrin and HIN domain-containing protein 1 [Source:UniProtKB/Swiss-Prot;Acc:Q8BV49]	2.50549	2.01271	1.6199	3.18728	5.51241	3.08991	0.29301	0.56888	0.0533	0.40665
ENSMUSG00000097271	-1.97157162985286	0.000204367	0.00264359	down	5:+:33629925-33632092	5:+:33629925-33632092	ENSMUSG00000097271	433873	Q8C9Y8	Gm9903	predicted gene 9903 [Source:MGI Symbol;Acc:MGI:3646113]	0.37789	0.11593	0.38519	0.40445	0.51656	0.3602	0.80314	0.6497	1.44297	0.96924
ENSMUSG00000040136	-1.18579015852249	0.000196517	0.00256699	down	7:-:46104523-46180033	7:-:46104523-46180033	ENSMUSG00000040136	20927	B2RUS7	Abcc8	ATP-binding cassette, sub-family C (CFTR/MRP), member 8 [Source:MGI Symbol;Acc:MGI:1352629]	0.2762	0.27538	0.36471	0.26996	0.40901	0.47319	0.67446	0.45208	0.53751	0.48837
ENSMUSG00000062785	-1.27171266651051	0.000200808	0.00260677	down	7:+:44590664-44604754	7:+:44590664-44604754	ENSMUSG00000062785	16504	A0A140LHN2,D3YZV2,Q63959,A0A140LHI4,A0A140LHT3,E9QKI2,A0A140LIW8	Kcnc3	potassium voltage-gated channel subfamily C member 3 isoform 2 [Source:RefSeq peptide;Acc:NP_001277611]	0.44048	0.27871	0.34538	0.47145	0.35124	0.49859	0.45941	0.69421	0.95663	0.61719
ENSMUSG00000028159	1.07702	0.000185451	0.00246241	up	3:-:137931007-137981545	3:-:137931007-137981545	ENSMUSG00000028159	26377	Q9QXT1	Dapp1	Dual adapter for phosphotyrosine and 3-phosphotyrosine and 3-phosphoinositide [Source:UniProtKB/Swiss-Prot;Acc:Q9QXT1]	2.79526	2.6028	2.23422	2.49212	3.10728	1.94551	0.74345	1.52903	0.55014	0.72993
ENSMUSG00000087362	2.04549	0.000171123	0.00233143	up	2:-:84500760-84531322	2:-:84500760-84531322	ENSMUSG00000087362	672763	-	Gm13710	predicted gene 13710	1.57874	1.83638	1.44831	1.73067	0.87281	1.41289	0.26925	0.26138	0.19592	0.19496
ENSMUSG00000023439	-1.21255873922602	0.000189391	0.00249505	down	6:-:124834240-124840275	6:-:124834240-124840275	ENSMUSG00000023439	14695	Q54AE3	Gnb3	guanine nucleotide binding protein (G protein), beta 3 [Source:MGI Symbol;Acc:MGI:95785]	1.48566	1.50049	2.63539	1.63515	1.05146	1.31498	3.21825	2.06038	2.32261	2.57334
ENSMUSG00000083041	2.67844	0.000131125	0.00192391	up	6:-:4893352-4893778	6:-:4893352-4893778	ENSMUSG00000083041	100040018	-	Gmfg-ps	glia maturation factor, gamma, pseudogene [Source:MGI Symbol;Acc:MGI:3704264]	0.35679	0.59288	0.96981	0.15043	0.56357	0.36843	0	0	0	0
ENSMUSG00000110386	2.33455	0.000222201	0.00280611	up	8:-:85125872-85132289	8:-:85125872-85132289	ENSMUSG00000110386	105246807	-	Gm42031	predicted gene, 42031 [Source:MGI Symbol;Acc:MGI:5624916]	2.64016	5.13033	2.16941	1.39714	2.29795	1.47444	0.19298	0.50178	0.4012	0.23289
ENSMUSG00000032322	2.44322	0.000208225	0.00267857	up	9:+:56089962-56128888	9:+:56089962-56128888	ENSMUSG00000032322	19200	A0A0R4J0P5	Pstpip1	proline-serine-threonine phosphatase interacting protein 1 [Source:HGNC Symbol;Acc:HGNC:9580]	5.66167	6.30583	5.87917	2.68343	2.85885	2.23177	0.44775	1.49822	0.181	0.5731
ENSMUSG00000010307	1.36401	0.000156361	0.00219215	up	7:+:47050601-47054777	7:+:47050601-47054777	ENSMUSG00000010307	67893	Q9D8N3	Tmem86a	Lysoplasmalogenase-like protein TMEM86A [Source:UniProtKB/Swiss-Prot;Acc:Q9D8N3]	29.3877	30.8835	21.2596	12.595	15.1121	15.5346	6.55425	7.68581	3.80735	6.11511
ENSMUSG00000113121	-2.26706036159041	0.000203799	0.00263858	down	13:+:68998793-69031550	13:+:68998793-69031550	ENSMUSG00000113121	102638647	-	Gm35161	predicted gene, 35161 [Source:MGI Symbol;Acc:MGI:5594320]	0.32523	0.09265	0.47359	0.23508	0.27521	0.4318	1.04597	0.86538	1.49914	0.68852
ENSMUSG00000097970	-1.86564044276506	0.000217323	0.00276597	down	1:+:23291537-23291935	1:+:23291537-23291935	ENSMUSG00000097970	-	-	Gm27028	predicted gene, 27028 [Source:MGI Symbol;Acc:MGI:5504143]	0.63637	0.38069	1.1676	1.77088	1.96015	1.83999	2.60481	3.31879	2.36923	3.77222
ENSMUSG00000034616	1.15776	0.000187124	0.00247745	up	19:-:4261668-4269172	19:-:4261668-4269172	ENSMUSG00000034616	245857	Q8K330	Ssh3	slingshot protein phosphatase 3	7.07992	7.52085	5.95093	4.05568	4.74266	3.54064	1.40346	2.11725	1.21903	2.22014
ENSMUSG00000038156	1.23362	0.00015231	0.00214964	up	7:+:113765998-114043370	7:+:113765998-114043370	ENSMUSG00000038156	233744	Q8VCC9	Spon1	spondin 1, (f-spondin) extracellular matrix protein [Source:MGI Symbol;Acc:MGI:2385287]	6.26101	5.60841	3.05636	2.77182	3.17555	4.43481	1.18127	1.76744	1.31725	1.17187
ENSMUSG00000064325	-1.21021207301548	0.00021118	0.0027078	down	8:-:79965851-80058006	8:-:79965851-80058006	ENSMUSG00000064325	15245	Q7TN16	Hhip	Hedgehog-interacting protein [Source:UniProtKB/Swiss-Prot;Acc:Q7TN16]	0.28536	0.45745	0.46197	0.53788	0.43749	0.22534	0.58401	0.93099	0.5555	0.46296
ENSMUSG00000031827	1.67804	0.000138439	0.00200214	up	8:-:119809222-119840544	8:-:119809222-119840544	ENSMUSG00000031827	72042	Q544F6	Cotl1	Coactosin-like protein [Source:UniProtKB/Swiss-Prot;Acc:Q9CQI6]	94.5016	137.524	102.003	41.3741	57.0705	46.5256	15.4986	27.064	14.4523	20.0006
ENSMUSG00000082292	3.28179	0.000173922	0.00235591	up	11:+:58187739-58189012	11:+:58187739-58189012	ENSMUSG00000082292	631323	Q0GUM3	Gm12250	predicted gene 12250	1.31541	1.11279	0.85325	3.02517	2.83335	1.93459	0.08158	0.34647	0.04947	0.04923
ENSMUSG00000047986	2.05584	0.000236275	0.00294575	up	8:+:84021471-84030295	8:+:84021471-84030295	ENSMUSG00000047986	74337	A2TJV2	Palm3	Paralemmin-3 [Source:UniProtKB/Swiss-Prot;Acc:A2TJV2]	1.61683	0.85508	0.55891	1.15594	1.13261	1.42279	0.14387	0.13966	0.12213	0.36461
ENSMUSG00000046402	1.54264	0.000168542	0.00231083	up	9:+:98422961-98446575	9:+:98422961-98446575	ENSMUSG00000046402	19659	Q00915	Rbp1	retinol binding protein 1, cellular [Source:MGI Symbol;Acc:MGI:97876]	19.2829	24.4949	16.4543	7.87188	9.48248	12.2399	3.37034	4.68411	2.68531	4.20925
ENSMUSG00000086245	-1.22700432223972	0.000176893	0.00238622	down	11:-:48843648-48853493	11:-:48843648-48853493	ENSMUSG00000086245	100861855	-	Gm16170	predicted gene 16170 [Source:MGI Symbol;Acc:MGI:3805548]	2.24558	1.2813	2.64748	3.93552	3.18917	2.22108	4.00057	3.82979	3.91157	5.22888
ENSMUSG00000097616	-1.21908442873371	0.000234575	0.00292829	down	6:+:13871526-14044385	6:+:13871526-14044385	ENSMUSG00000097616	76311	-	1110019D14Rik	RIKEN cDNA 1110019D14 gene	1.14217	0.93438	0.6866	0.9261	1.52659	1.69356	1.918	1.85462	1.30841	2.09767
ENSMUSG00000035606	-1.51469131298256	0.000120541	0.00181779	down	9:+:102505750-102546239	9:+:102505750-102546239	ENSMUSG00000035606	16716	F8VQF8	Ky	kyphoscoliosis peptidase [Source:HGNC Symbol;Acc:HGNC:26576]	20.2129	9.48215	19.5203	28.1565	33.4015	29.3285	59.2317	61.1908	65.5729	43.288
ENSMUSG00000056758	5.04191	0.00018737	0.00247958	up	10:-:120361275-120476469	10:-:120361275-120476469	ENSMUSG00000056758	15364	P52927	Hmga2	high mobility group AT-hook 2 [Source:MGI Symbol;Acc:MGI:101761]	0.65241	1.16635	0.97076	0.29404	0.23098	0.21682	0.01535	0	0.03722	0
ENSMUSG00000030708	1.82923	0.000237362	0.00295628	up	7:-:100501716-100514960	7:-:100501716-100514960	ENSMUSG00000030708	69387	Q80Y75	Dnajb13	DnaJ homolog subfamily B member 13 [Source:UniProtKB/Swiss-Prot;Acc:Q80Y75]	1.2454	0.87104	1.09894	0.65833	0.90286	0.80618	0.09511	0.41546	0.09227	0.25251
ENSMUSG00000040424	-1.04233623579844	0.000199075	0.00258886	down	7:+:27523267-27531175	7:+:27523267-27531175	ENSMUSG00000040424	233020	Q3V016	Hipk4	Homeodomain-interacting protein kinase 4 [Source:UniProtKB/Swiss-Prot;Acc:Q3V016]	1.42069	1.2776	1.66109	2.43126	1.76558	1.49581	2.48	1.98891	2.99033	2.23607
ENSMUSG00000080768	2.71885	0.000161828	0.00223891	up	11:-:53967063-53967505	11:-:53967063-53967505	ENSMUSG00000080768	102633183	-	Gm12219	predicted gene 12219 [Source:MGI Symbol;Acc:MGI:3649338]	0.6878	0.45717	1.28533	0.435	0.67902	0.4735	0	0	0.14226	0
ENSMUSG00000085295	3.88428	0.000183194	0.00244008	up	4:-:6352105-6357530	4:-:6352105-6357530	ENSMUSG00000085295	71639	-	4930430E12Rik	RIKEN cDNA 4930430E12 gene [Source:MGI Symbol;Acc:MGI:1918889]	1.43176	2.09665	1.3682	0.28297	1.06012	0.97025	0	0.05556	0.16658	0
ENSMUSG00000092528	1.83735	0.000245047	0.00301785	up	11:-:71242430-71285232	11:-:71242430-71285232	ENSMUSG00000092528	627984	-	Nlrp1c-ps	NLR family, pyrin domain containing 1C, pseudogene	0.91077	0.7616	1.0781	0.65033	0.6265	0.57643	0.06013	0.20064	0.21876	0.16327
ENSMUSG00000037418	1.41958	0.000248842	0.0030492	up	19:-:9985174-10001633	19:-:9985174-10001633	ENSMUSG00000037418	24115	O88870	Best1	Bestrophin-1 [Source:UniProtKB/Swiss-Prot;Acc:O88870]	1.29788	1.15286	0.81783	1.1044	1.00642	1.31587	0.26562	0.35162	0.17571	0.37884
ENSMUSG00000109392	-2.38763297151891	0.00022664	0.00284744	down	7:+:120812365-120831193	7:+:120812365-120831193	ENSMUSG00000109392	436008	A0A140LI11	Gm5737	short chain dehydrogenase/reductase family 42E, member 2 [Source:HGNC Symbol;Acc:HGNC:35414]	0.11977	0.19902	0.36625	0.0505	0.56756	0.37104	0.81707	0.99146	0.79272	0.78884
ENSMUSG00000022636	1.02109	0.00020893	0.002686	up	16:-:52248996-52454074	16:-:52248996-52454074	ENSMUSG00000022636	11658	Q61490	Alcam	CD166 antigen [Source:UniProtKB/Swiss-Prot;Acc:Q61490]	1.76859	2.54545	2.06444	1.54249	1.83332	1.41391	0.38677	0.85009	0.70801	0.73977
ENSMUSG00000046006	3.29397	0.000212154	0.00271792	up	13:-:110352616-110357199	13:-:110352616-110357199	ENSMUSG00000046006	238875	Q8CB93	Gapt	Grb2-binding adaptor, transmembrane	1.36657	1.16786	1.46759	1.04948	1.47441	1.83955	0.12486	0.42422	0	0.15068
ENSMUSG00000043157	3.27719	0.000257059	0.00313024	up	14:+:61309753-61311936	14:+:61309753-61311936	ENSMUSG00000043157	219144	Q6P3A9	Arl11	ADP-ribosylation factor-like 11	6.37108	7.74313	4.74026	1.5588	2.53428	2.73724	0.14276	0.54857	0.17314	0.37329
ENSMUSG00000024500	-1.29854667011402	0.000256666	0.00312678	down	18:-:42637432-43059471	18:-:42637432-43059471	ENSMUSG00000024500	72930	Q6ZWR4	Ppp2r2b	protein phosphatase 2, regulatory subunit B, beta [Source:MGI Symbol;Acc:MGI:1920180]	0.33133	0.24141	0.35072	0.29014	0.31704	0.36846	0.66506	0.538	0.56933	0.40917
ENSMUSG00000046031	2.98787	0.000192299	0.00252428	up	10:-:34126067-34127984	10:-:34126067-34127984	ENSMUSG00000046031	215900	Q8C9E8	Fam26f	family with sequence similarity 26, member F [Source:MGI Symbol;Acc:MGI:2443082]	2.69232	1.61985	1.23022	1.11559	3.40952	1.05455	0.285	0.17292	0.05761	0.05732
ENSMUSG00000020182	-1.14848658375494	0.000159006	0.00221639	down	11:-:11814101-11898144	11:-:11814101-11898144	ENSMUSG00000020182	13195	O88533	Ddc	Aromatic-L-amino-acid decarboxylase [Source:UniProtKB/Swiss-Prot;Acc:O88533]	5.44141	4.04055	3.63193	5.32768	5.67765	8.69883	10.6355	7.43511	10.878	8.46297
ENSMUSG00000029167	-1.63887202918675	0.000161414	0.00223663	down	5:-:51454250-51567726	5:-:51454250-51567726	ENSMUSG00000029167	19017	O70343	Ppargc1a	Peroxisome proliferator-activated receptor gamma coactivator 1-alpha [Source:UniProtKB/Swiss-Prot;Acc:O70343]	2.28029	1.37486	4.73506	2.78687	3.9335	3.33317	9.16813	4.68719	5.21993	10.6076
ENSMUSG00000075224	-1.0160924852878	0.00024283	0.00300066	down	2:-:85162334-85196699	2:-:85162334-85196699	ENSMUSG00000075224	241528	Q3UY51	Lrrc55	leucine rich repeat containing 55	0.84638	0.62049	0.77392	0.69273	0.57507	0.4627	0.82789	1.14368	0.95768	0.78391
ENSMUSG00000060639	-1.33879080210981	0.00020826	0.00267857	down	13:-:22040636-22041362	13:-:22040636-22041362	ENSMUSG00000060639	319158	P62806	Hist1h4i	Histone H4 [Source:UniProtKB/Swiss-Prot;Acc:P62806]	9.36021	13.0932	9.04262	6.89174	7.44779	5.04923	19.514	19.3421	15.517	8.3675
ENSMUSG00000034457	1.49166	0.000161887	0.00223891	up	X:-:97333840-97377216	X:-:97333840-97377216	ENSMUSG00000034457	245527	Q3KP88	Eda2r	Tumor necrosis factor receptor superfamily member 27 [Source:UniProtKB/Swiss-Prot;Acc:Q8BX35]	11.8789	11.156	6.80985	19.8559	12.6737	14.3139	2.96393	2.29065	4.60012	4.56696
ENSMUSG00000003206	1.75563	0.000260453	0.00316558	up	17:+:55952623-55957021	17:+:55952623-55957021	ENSMUSG00000003206	50498	Q3U1K3	Ebi3	Epstein-Barr virus induced gene 3	1.86637	2.63978	1.81394	1.26273	2.93095	2.50994	0.31091	0.48505	0.26932	0.75041
ENSMUSG00000030162	2.6142	0.000219493	0.00278295	up	6:-:129485244-129507165	6:-:129485244-129507165	ENSMUSG00000030162	108078	Q9EQ09	Olr1	Oxidized low-density lipoprotein receptor 1 Oxidized low-density lipoprotein receptor 1, soluble form [Source:UniProtKB/Swiss-Prot;Acc:Q9EQ09]	0.32699	0.9497	0.6811	0.50352	0.42106	0.39638	0.0291	0.14123	0.05293	0.03511
ENSMUSG00000085201	-2.45429868743012	0.000204908	0.00264942	down	2:+:38823257-38852370	2:+:38823257-38852370	ENSMUSG00000085201	102640822	-	Nr6a1os	nuclear receptor subfamily 6, group A, member 1, opposite strand [Source:MGI Symbol;Acc:MGI:3649430]	0.1268	0.12642	0.32312	0.08019	0.52576	0.13094	1.03802	0.70851	0.47207	0.86123
ENSMUSG00000054659	-1.51271527907933	0.000184823	0.00245586	down	4:-:33174230-33189737	4:-:33174230-33189737	ENSMUSG00000054659	242377	A3KG59	Pm20d2	Peptidase M20 domain-containing protein 2 [Source:UniProtKB/Swiss-Prot;Acc:A3KG59]	5.75943	2.67791	7.98753	7.3551	6.72471	7.72015	12.5523	8.49242	16.8035	16.1399
ENSMUSG00000026241	-1.81956509806303	0.000270051	0.00326132	down	1:-:86666291-86670571	1:-:86666291-86670571	ENSMUSG00000026241	18159	Q61839	Nppc	natriuretic peptide type C [Source:MGI Symbol;Acc:MGI:97369]	0.82851	0.77745	0.59613	0.98633	0.57737	0.60391	2.54344	1.81546	2.17733	0.96297
ENSMUSG00000032530	1.87916	0.00021762	0.00276831	up	9:-:121577843-121642096	9:-:121577843-121642096	ENSMUSG00000032530	69032	Q78ID0	Lyzl4	lysozyme-like 4 [Source:MGI Symbol;Acc:MGI:1916282]	1.0142	0.75839	0.66458	0.77888	0.72949	0.93509	0.18533	0.17991	0.0899	0.13419
ENSMUSG00000062488	2.79111	0.000272345	0.00327552	up	19:+:34607970-34613401	19:+:34607970-34613401	ENSMUSG00000062488	667370	E9PV48	Ifit3b	interferon-induced protein with tetratricopeptide repeats 3B	2.25983	1.44301	2.19996	6.19863	4.15115	3.46103	0.33778	0.31529	0.2836	0.18814
ENSMUSG00000056737	1.67083	0.00016976	0.00232318	up	6:+:72544391-72562983	6:+:72544391-72562983	ENSMUSG00000056737	12332	Q3TNN6	Capg	capping actin protein, gelsolin like [Source:HGNC Symbol;Acc:HGNC:1474]	36.586	53.855	43.8835	19.2272	20.7913	17.6044	5.89727	9.74904	5.45739	9.47268
ENSMUSG00000099974	3.26119	0.000210616	0.00270294	up	9:-:88723285-88731914	9:-:88723285-88731914	ENSMUSG00000099974	12047	O55179	Bcl2a1d	B cell leukemia/lymphoma 2 related protein A1d [Source:MGI Symbol;Acc:MGI:1278325]	2.29493	2.8748	2.87909	1.4142	3.34618	2.49135	0.18065	0.65761	0	0.29068
ENSMUSG00000068220	1.16535	0.000129413	0.00190488	up	15:+:78926725-78930465	15:+:78926725-78930465	ENSMUSG00000068220	16852	P16045	Lgals1	lectin, galactose binding, soluble 1	1086.4	1179.28	814.289	513.805	557.91	791.301	409.972	409.836	257.391	286.202
ENSMUSG00000009185	7.15379	0.000224185	0.00282629	up	11:+:82115185-82116799	11:+:82115185-82116799	ENSMUSG00000009185	20307	Q149U7	Ccl8	C-C motif chemokine 8 [Source:UniProtKB/Swiss-Prot;Acc:Q9Z121]	21.8634	37.4536	18.7403	42.1107	61.5744	90.3073	0	1.11059	0	0.73636
ENSMUSG00000089929	4.25556	0.00021527	0.00274702	up	9:+:89199209-89207827	9:+:89199209-89207827	ENSMUSG00000089929	12045	Q497M6	Bcl2a1b	B cell leukemia/lymphoma 2 related protein A1b [Source:MGI Symbol;Acc:MGI:1278326]	2.98356	5.94939	2.97784	1.25796	0.88365	1.02697	0.12721	0.23154	0	0
ENSMUSG00000089703	-2.0777991325081	0.00027189	0.00327139	down	1:+:44212162-44213118	1:+:44212162-44213118	ENSMUSG00000089703	100534373	-	Gm15833	predicted gene 15833 [Source:MGI Symbol;Acc:MGI:3801794]	0.31839	0.10581	0.64907	0.73833	0.69151	0.49316	0.92311	1.84493	0.85609	2.09699
ENSMUSG00000038292	-1.97491177915849	0.00028254	0.00337046	down	7:-:45183624-45204892	7:-:45183624-45204892	ENSMUSG00000038292	384619	Q80VJ8	Ccdc155	Protein KASH5 [Source:UniProtKB/Swiss-Prot;Acc:Q80VJ8]	0.57976	0.62085	0.24076	0.32593	0.58508	0.62085	1.93361	1.83972	1.30573	0.6099
ENSMUSG00000032403	-1.15615017832716	0.000259726	0.00316009	down	9:-:63394447-63399246	9:-:63394447-63399246	ENSMUSG00000032403	69478	Q9D7P2	2300009A05Rik	Uncharacterized [Source:UniProtKB/Swiss-Prot;Acc:Q0VG49]	1.11722	1.77211	1.75997	1.60586	1.77477	1.33722	3.29983	1.73407	2.14274	2.53988
ENSMUSG00000030786	3.12994	0.000261704	0.00317756	up	7:+:128062640-128118491	7:+:128062640-128118491	ENSMUSG00000030786	16409	G5E8F1	Itgam	integrin alpha M [Source:MGI Symbol;Acc:MGI:96607]	6.49945	10.9346	7.44927	2.49318	2.59854	2.69297	0.2379	0.85348	0.21325	0.51179
ENSMUSG00000042962	-1.460327168866	0.000218037	0.00276905	down	12:-:84258331-84258973	12:-:84258331-84258973	ENSMUSG00000042962	432676	-	Gm5436	predicted pseudogene 5436 [Source:MGI Symbol;Acc:MGI:3643291]	6.7131	7.95304	7.56732	14.8848	15.9994	20.3072	16.5677	21.967	23.8169	29.9424
ENSMUSG00000022223	-1.1329695430144	0.000212682	0.00272229	down	14:-:55897283-55900293	14:-:55897283-55900293	ENSMUSG00000022223	654795	Q5M8N4	Sdr39u1	short chain dehydrogenase/reductase family 39U, member 1	4.58669	2.87098	5.11557	3.174	3.36261	3.24961	8.75569	6.48704	5.13056	4.03863
ENSMUSG00000097705	-1.47071072283468	0.000215594	0.00274766	down	10:-:22187013-22302835	10:-:22187013-22302835	ENSMUSG00000097705	102637787	-	Gm26740	predicted gene, 26740 [Source:MGI Symbol;Acc:MGI:5477234]	2.59215	2.99561	4.2636	6.22225	7.04909	5.65766	8.13851	6.54711	12.9772	10.2946
ENSMUSG00000030577	3.13313	0.000294275	0.00347225	up	7:-:30865402-30880342	7:-:30865402-30880342	ENSMUSG00000030577	12483	Q3UP36	Cd22	CD22 molecule [Source:HGNC Symbol;Acc:HGNC:1643]	1.30935	1.54647	0.87265	1.50331	3.06655	1.57049	0.17521	0.23762	0.0125	0.27364
ENSMUSG00000038650	1.05387	0.000159374	0.00221921	up	7:-:141160326-141172857	7:-:141160326-141172857	ENSMUSG00000038650	107702	Q91VI7	Rnh1	Ribonuclease inhibitor [Source:UniProtKB/Swiss-Prot;Acc:Q91VI7]	64.6236	80.0466	58.4686	34.9402	40.6102	40.6338	21.776	24.0414	19.2661	19.4619
ENSMUSG00000052087	1.6163	0.000290252	0.00343586	up	13:+:55369732-55384687	13:+:55369732-55384687	ENSMUSG00000052087	51791	P97492	Rgs14	Regulator of G-protein signaling 14 [Source:UniProtKB/Swiss-Prot;Acc:P97492]	1.49748	1.89914	2.18582	0.9395	1.46182	0.82884	0.2084	0.47601	0.26761	0.35506
ENSMUSG00000001128	1.32973	0.000197369	0.00257582	up	X:-:20925454-20931555	X:-:20925454-20931555	ENSMUSG00000001128	18636	A2AE15	Cfp	complement factor properdin [Source:MGI Symbol;Acc:MGI:97545]	25.5376	40.2196	26.3887	17.6127	23.4963	14.2578	4.87928	11.3692	6.38929	7.62239
ENSMUSG00000038179	3.65496	0.000287114	0.00340629	up	1:-:171632403-171653035	1:-:171632403-171653035	ENSMUSG00000038179	75345	Q8BHK6	Slamf7	SLAM family member 7 [Source:MGI Symbol;Acc:MGI:1922595]	1.66428	1.22791	0.84821	1.67007	1.72191	1.36341	0.10218	0.33065	0	0.19183
ENSMUSG00000105245	-1.41962426594618	0.000279627	0.00333978	down	3:+:97730339-97736166	3:+:97730339-97736166	ENSMUSG00000105245	102633492	-	Gm31305	predicted gene, 31305 [Source:MGI Symbol;Acc:MGI:5590464]	1.18271	1.4003	2.71251	2.244	2.01414	1.6793	3.36606	2.11108	4.31152	4.15349
ENSMUSG00000031340	1.52786	0.000297361	0.00349639	up	X:-:72255999-72274803	X:-:72255999-72274803	ENSMUSG00000031340	14404	A2AMW3	Gabre	gamma-aminobutyric acid (GABA) A receptor, subunit epsilon	1.44756	1.60362	1.11484	1.30205	0.8384	1.02975	0.17556	0.2796	0.53228	0.25159
ENSMUSG00000051890	-1.18985093581617	0.000214001	0.00273439	down	12:+:69241176-69284632	12:+:69241176-69284632	ENSMUSG00000051890	271005	Q80YG3	Klhdc1	Kelch domain-containing protein 1 [Source:UniProtKB/Swiss-Prot;Acc:Q80YG3]	2.88151	2.01752	2.90418	5.05767	4.85205	4.37974	6.75871	5.70871	5.44433	5.81751
ENSMUSG00000078853	1.28149	0.000240394	0.00297934	up	11:+:58199556-58207591	11:+:58199556-58207591	ENSMUSG00000078853	16145	Q9DCE9	Igtp	interferon gamma induced GTPase	9.64418	7.66237	6.01606	12.0718	10.5327	11.1519	3.54663	3.49278	1.58957	2.60529
ENSMUSG00000009772	1.33078	0.000302256	0.00354485	up	1:+:132316126-132333488	1:+:132316126-132333488	ENSMUSG00000009772	74137	Q8BZN4	Nuak2	NUAK family SNF1-like kinase 2 [Source:UniProtKB/Swiss-Prot;Acc:Q8BZN4]	1.72298	2.0666	1.14884	1.11427	1.55008	1.11033	0.22536	0.48258	0.30546	0.67193
ENSMUSG00000009210	-1.13823910714951	0.000247703	0.00304242	down	11:+:106365472-106377558	11:+:106365472-106377558	ENSMUSG00000009210	75573	B1ARI9	Prr29	Proline-rich protein 29 [Source:UniProtKB/Swiss-Prot;Acc:B1ARI9]	3.24019	2.7313	5.58471	3.20427	4.04799	3.22426	7.83708	4.24282	5.77576	5.2746
ENSMUSG00000058914	1.64675	0.000177951	0.00239718	up	15:+:10952332-10980150	15:+:10952332-10980150	ENSMUSG00000058914	81799	Q4ZJN6	C1qtnf3	Complement C1q tumor necrosis factor-related protein 3 [Source:UniProtKB/Swiss-Prot;Acc:Q9ES30]	86.0743	63.958	39.4351	32.5318	33.7159	53.1166	18.4736	22.0959	6.65461	9.63874
ENSMUSG00000115205	-1.13547077384897	0.000320708	0.00368324	down	15:+:4885120-4886118	15:+:4885120-4886118	ENSMUSG00000115205	-	-	AC117588.1	-	0.915	0.8616	0.82905	1.22168	1.26466	1.04985	1.30045	1.89361	1.57712	1.50662
ENSMUSG00000031778	1.05983	0.000262628	0.00318614	up	8:+:94772009-94782427	8:+:94772009-94782427	ENSMUSG00000031778	20312	O35188	Cx3cl1	chemokine (C-X3-C motif) ligand 1 [Source:MGI Symbol;Acc:MGI:1097153]	4.04452	4.84416	2.5816	3.02376	2.55648	2.57529	0.97849	1.55637	0.84991	0.98937
ENSMUSG00000016496	1.55218	0.000308426	0.00359205	up	19:+:29367455-29388095	19:+:29367455-29388095	ENSMUSG00000016496	60533	Q3U472	Cd274	CD274 antigen [Source:MGI Symbol;Acc:MGI:1926446]	1.47216	1.71941	1.71498	2.37643	3.03964	1.62155	0.37303	1.00975	0.34799	0.31166
ENSMUSG00000026117	2.59427	0.00030679	0.00358382	up	1:+:36761798-36782818	1:+:36761798-36782818	ENSMUSG00000026117	22637	P43404	Zap70	zeta-chain (TCR) associated protein kinase [Source:MGI Symbol;Acc:MGI:99613]	0.91653	0.76151	0.67473	0.90169	2.05096	0.7887	0.01737	0.14753	0.12638	0.27248
ENSMUSG00000028518	-1.16439691953956	0.000161921	0.00223891	down	4:-:105029874-105109890	4:-:105029874-105109890	ENSMUSG00000028518	108079	Q8BRK8	Prkaa2	protein kinase, AMP-activated, alpha 2 catalytic subunit [Source:MGI Symbol;Acc:MGI:1336173]	10.8333	7.1732	11.7831	17.5156	18.3905	14.7074	23.9647	24.4743	32.1395	23.2784
ENSMUSG00000108196	3.00605	0.000234308	0.0029262	up	6:+:134754246-134755192	6:+:134754246-134755192	ENSMUSG00000108196	102640204	-	Gm36328	predicted gene, 36328 [Source:MGI Symbol;Acc:MGI:5595487]	2.93881	2.69567	0.71894	1.33822	1.1141	2.42777	0.12029	0	0.14588	0.14517
ENSMUSG00000027219	-1.03026185397279	0.000218919	0.00277904	down	2:+:122426477-122461137	2:+:122426477-122461137	ENSMUSG00000027219	269346	O88627	Slc28a2	Mus musculus solute carrier family 28 (sodium-coupled nucleoside transporter), member 2 (Slc28a2), transcript variant 2, mRNA. [Source:RefSeq mRNA;Acc:NM_001356532]	2.07572	2.86368	2.78008	3.40406	5.1612	3.20272	4.06292	4.70531	4.53792	6.12526
ENSMUSG00000060131	2.70293	0.000325427	0.00372284	up	2:-:126320973-126500674	2:-:126320973-126500674	ENSMUSG00000060131	241633	Q69Z59	Atp8b4	ATPase, class I, type 8B, member 4 [Source:MGI Symbol;Acc:MGI:1859664]	1.20475	1.79416	1.75655	0.7523	1.02076	0.70865	0.06242	0.48287	0.02839	0.23541
ENSMUSG00000105597	-1.30528803162331	0.000319235	0.00367208	down	3:-:121787500-121788572	3:-:121787500-121788572	ENSMUSG00000105597	70828	-	4633401B06Rik	RIKEN cDNA 4633401B06 gene [Source:MGI Symbol;Acc:MGI:1918078]	0.99388	1.03812	1.44726	1.97553	2.07454	2.1015	1.93722	2.40945	2.70177	3.62369
ENSMUSG00000025128	1.61545	0.000328974	0.00375149	up	3:+:18054174-18057517	3:+:18054174-18057517	ENSMUSG00000025128	59058	Q8C6A8	Bhlhe22	basic helix-loop-helix family member e22 [Source:HGNC Symbol;Acc:HGNC:11963]	1.07822	1.05988	0.85138	0.80677	0.68365	0.72136	0.20202	0.15085	0.09423	0.41259
ENSMUSG00000035578	-1.49181663894654	0.000322034	0.00369304	down	16:-:33015385-33056218	16:-:33015385-33056218	ENSMUSG00000035578	69707	Q80W32	Iqcg	IQ domain-containing protein G [Source:UniProtKB/Swiss-Prot;Acc:Q80W32]	0.58674	0.27788	0.49341	0.61229	0.22591	0.48471	1.20083	0.85606	0.60073	0.7427
ENSMUSG00000110525	-2.67752482017302	0.000255503	0.00311648	down	8:+:122836551-122836797	8:+:122836551-122836797	ENSMUSG00000110525	-	-	Gm45893	predicted gene 45893 [Source:MGI Symbol;Acc:MGI:5805008]	0.2056	0.20499	0.41914	0.78018	1.46141	0	1.68311	1.53175	1.53089	2.53899
ENSMUSG00000051279	2.96363	0.000291216	0.00344588	up	4:+:9844372-9862345	4:+:9844372-9862345	ENSMUSG00000051279	242316	P43028	Gdf6	Growth/differentiation factor 6 [Source:UniProtKB/Swiss-Prot;Acc:P43028]	0.80516	0.65942	1.18711	0.85476	0.3066	0.69781	0.10299	0.03571	0.01784	0.12429
ENSMUSG00000021596	1.18752	0.00031008	0.00360357	up	13:+:76384535-77031810	13:+:76384535-77031810	ENSMUSG00000021596	78771	E9PW38	Mctp1	Multiple C2 and transmembrane domain-containing protein 1 [Source:UniProtKB/Swiss-Prot;Acc:E9PV86]	0.66942	1.29159	1.04248	0.74482	0.79305	0.81287	0.18394	0.31555	0.20769	0.39803
ENSMUSG00000029343	-1.79152199606483	0.000307973	0.00359048	down	5:+:112255815-112269585	5:+:112255815-112269585	ENSMUSG00000029343	12960	Q9WVJ5	Crybb1	Beta-crystallin B1 Beta-crystallin B1B [Source:UniProtKB/Swiss-Prot;Acc:Q9WVJ5]	0.36089	0.41122	0.36786	0.45649	0.12216	0.26619	0.63309	1.15231	0.63981	0.89135
ENSMUSG00000000982	3.21337	0.000260758	0.00316738	up	11:-:83647844-83649355	11:-:83647844-83649355	ENSMUSG00000000982	20302	P10855	Ccl3	C-C motif chemokine 3 [Source:UniProtKB/Swiss-Prot;Acc:P10855]	4.11035	4.49473	3.51398	1.25786	1.41372	1.8484	0.27136	0.16464	0.08227	0.16374
ENSMUSG00000019906	-1.10708856525553	0.000308475	0.00359205	down	10:+:107271686-107421474	10:+:107271686-107421474	ENSMUSG00000019906	108030	Q8JZS0	Lin7a	lin-7 homolog A (C. elegans)	0.84357	0.91752	1.15691	1.24162	0.63596	0.57017	0.9417	1.59976	1.29431	1.42056
ENSMUSG00000085653	-1.36878267969603	0.00032342	0.00370566	down	1:-:75368212-75375012	1:-:75368212-75375012	ENSMUSG00000085653	100503248	-	Gm15179	predicted gene 15179	1.87433	1.75196	2.26877	3.55624	2.77562	1.63307	5.39438	2.69102	4.14329	3.97834
ENSMUSG00000072640	-1.00829983120169	0.000252033	0.00308572	down	11:+:78826584-78846870	11:+:78826584-78846870	ENSMUSG00000072640	66274	Q3UN90	Lyrm9	LYR motif-containing protein 9 [Source:UniProtKB/Swiss-Prot;Acc:Q3UN90]	0.95381	0.68992	0.90869	1.19858	1.07088	1.35187	1.56931	1.18435	1.6324	1.57052
ENSMUSG00000049723	4.84244	0.000336994	0.00382376	up	9:+:7344381-7369499	9:+:7344381-7369499	ENSMUSG00000049723	17381	P34960	Mmp12	Macrophage metalloelastase [Source:UniProtKB/Swiss-Prot;Acc:P34960]	3.33312	6.35958	2.9755	1.36688	1.23033	1.07242	0.0359	0.05228	0.09579	0.04333
ENSMUSG00000039109	1.04202	0.000177938	0.00239718	up	13:-:36867178-37050244	13:-:36867178-37050244	ENSMUSG00000039109	74145	Q3V3W7	F13a1	coagulation factor XIII, A1 subunit	16.9853	30.6841	19.5487	25.7357	27.907	24.6519	6.69333	15.673	8.49141	11.7907
ENSMUSG00000062524	2.63603	0.000244359	0.00301191	up	7:+:4337724-4345164	7:+:4337724-4345164	ENSMUSG00000062524	17086	Q8C567	Ncr1	natural cytotoxicity triggering receptor 1 [Source:HGNC Symbol;Acc:HGNC:6731]	0.46166	0.42741	0.40335	0.50053	0.82038	0.44267	0.10123	0.08189	0	0.04072
ENSMUSG00000042895	-1.19943042406942	0.000170017	0.00232399	down	15:-:41864076-41869720	15:-:41864076-41869720	ENSMUSG00000042895	223513	Q8BUZ1	Abra	actin-binding Rho activating protein	21.445	23.3528	29.9913	50.9305	41.7031	48.6375	70.8055	61.3849	69.072	83.9964
ENSMUSG00000022085	-3.21118209253262	0.00028682	0.00340486	down	14:+:69840420-70059918	14:+:69840420-70059918	ENSMUSG00000022085	73523	Q9D9L9	Pebp4	phosphatidylethanolamine binding protein 4	0.37652	0	0	0.05953	0.3903	0.2916	0.52977	0.8766	0.99293	0.69746
ENSMUSG00000019933	-1.25944736243815	0.000241685	0.00299154	down	10:+:70204664-70219711	10:+:70204664-70219711	ENSMUSG00000019933	69563	Q9CV60	Mrln	Myoregulin [Source:UniProtKB/Swiss-Prot;Acc:Q9CV60]	10.673	8.36711	10.7037	6.75007	7.13781	8.13261	27.9206	14.8558	8.59871	14.6153
ENSMUSG00000026068	2.06796	0.000347561	0.00390886	up	1:+:40515362-40551705	1:+:40515362-40551705	ENSMUSG00000026068	16174	Q9Z2B1	Il18rap	Interleukin-18 receptor accessory protein [Source:UniProtKB/Swiss-Prot;Acc:Q9Z2B1]	0.75211	0.6149	0.94297	0.40908	0.74846	0.35726	0.06927	0.23348	0.03734	0.14861
ENSMUSG00000031506	1.61431	0.000315236	0.00364469	up	1:+:135132700-135145317	1:+:135132700-135145317	ENSMUSG00000031506	320139	Q8BUM3	Ptpn7	Mus musculus protein tyrosine phosphatase, non-receptor type 7 (Ptpn7), transcript variant 2, mRNA. [Source:RefSeq mRNA;Acc:NM_001356382]	1.84755	2.79628	2.01049	1.07373	1.66622	1.07423	0.34916	0.78537	0.20656	0.34943
ENSMUSG00000021678	1.28419	0.000338499	0.00383554	up	13:-:95511732-95525227	13:-:95511732-95525227	ENSMUSG00000021678	14063	Q3TU81	F2rl1	coagulation factor II (thrombin) receptor-like 1	1.83418	2.58608	2.96494	2.03882	1.66811	1.41574	0.56876	0.50611	0.43685	0.80079
ENSMUSG00000047230	2.23541	0.000351311	0.00393592	up	X:+:139800828-139811386	X:+:139800828-139811386	ENSMUSG00000047230	12738	O88552	Cldn2	Claudin-2 [Source:UniProtKB/Swiss-Prot;Acc:O88552]	2.9935	2.42119	0.74727	1.9705	1.75509	2.44456	0.20317	0.34136	0.17058	0.45267
ENSMUSG00000075122	1.92882	0.000323548	0.00370568	up	16:+:38458933-38486933	16:+:38458933-38486933	ENSMUSG00000075122	12519	Q549R2	Cd80	CD80 antigen	0.89564	1.42876	0.63906	0.98183	1.4501	0.61658	0.1222	0.14828	0.18525	0.22121
ENSMUSG00000029622	1.13617	0.000178264	0.00240029	up	5:+:145114215-145130705	5:+:145114215-145130705	ENSMUSG00000029622	11867	Q9WV32	Arpc1b	Actin-related protein 2/3 complex subunit 1B [Source:UniProtKB/Swiss-Prot;Acc:Q9WV32]	51.984	72.7256	56.4897	33.5551	34.8737	29.6903	17.5963	24.212	13.0479	18.4522
ENSMUSG00000106981	-1.07077751841517	0.000329646	0.00375351	down	5:+:53281810-53283509	5:+:53281810-53283509	ENSMUSG00000106981	-	-	Gm45495	predicted gene 45495 [Source:MGI Symbol;Acc:MGI:5791331]	2.12092	1.13177	0.97438	1.7759	2.08796	1.35727	2.41488	2.29973	1.70529	2.28718
ENSMUSG00000020099	-1.02398884537044	0.000212298	0.00271857	down	10:-:60762593-60831581	10:-:60762593-60831581	ENSMUSG00000020099	107449	Q8K1S3	Unc5b	unc-5 netrin receptor B	4.45505	3.2282	5.9142	4.10575	3.82619	3.61163	7.06663	10.5498	5.65966	4.61981
ENSMUSG00000089498	-2.39081666107055	0.000224542	0.00282867	down	10:-:67235861-67235961	10:-:67235861-67235961	ENSMUSG00000089498	-	-	Gm26359	predicted gene, 26359 [Source:MGI Symbol;Acc:MGI:5456136]	0	0.5013	0.51251	0	0.59566	0	1.54354	0.62433	1.24795	2.48369
ENSMUSG00000067714	1.88352	0.000341595	0.00385063	up	6:+:125067920-125082472	6:+:125067920-125082472	ENSMUSG00000067714	381810	G3X9K0	Lpar5	lysophosphatidic acid receptor 5 [Source:HGNC Symbol;Acc:HGNC:13307]	1.37432	0.86893	1.09336	1.01758	1.27074	1.73069	0.1372	0.54108	0.1248	0.24837
ENSMUSG00000086527	-2.32531151136852	0.000306931	0.00358404	down	6:-:121223692-121226153	6:-:121223692-121226153	ENSMUSG00000086527	-	-	Gm15856	predicted gene 15856 [Source:MGI Symbol;Acc:MGI:3801888]	0.17481	0.08715	0.04455	0.2764	0.51774	0.18052	0.49193	0.65119	0.7593	0.59367
ENSMUSG00000030124	1.23719	0.000344086	0.00387573	up	6:-:124904361-124911705	6:-:124904361-124911705	ENSMUSG00000030124	16768	Q61790	Lag3	Lymphocyte activation 3 protein [Source:UniProtKB/Swiss-Prot;Acc:Q61790]	3.49146	2.95292	2.3317	2.83253	2.13946	3.65512	0.8624	1.07637	0.8367	0.59472
ENSMUSG00000050052	-1.27196196891995	0.000327772	0.00374089	down	8:-:13952008-13975032	8:-:13952008-13975032	ENSMUSG00000050052	72148	Q8C5P7	Tdrp	testis development related protein [Source:MGI Symbol;Acc:MGI:1919398]	0.35694	0.43137	0.52921	0.7388	1.15326	0.726	1.0847	1.20876	1.02016	0.78809
ENSMUSG00000050675	-1.20698529077625	0.000364668	0.00403177	down	11:+:70639122-70642036	11:+:70639122-70642036	ENSMUSG00000050675	14723	O35930	Gp1ba	glycoprotein 1b, alpha polypeptide [Source:MGI Symbol;Acc:MGI:1333744]	0.50446	0.63336	0.45707	0.30723	0.7083	0.36658	0.65005	0.76559	0.85791	0.85371
ENSMUSG00000001281	1.22544	0.000328308	0.00374555	up	15:-:102215995-102231944	15:-:102215995-102231944	ENSMUSG00000001281	16421	P26011	Itgb7	Integrin beta-7 [Source:UniProtKB/Swiss-Prot;Acc:P26011]	3.02496	2.66868	3.25158	2.45807	4.40895	3.36978	0.52529	1.41139	0.72805	1.38105
ENSMUSG00000070385	-1.26822409288304	0.000164184	0.00226273	down	3:+:103074014-103099720	3:+:103074014-103099720	ENSMUSG00000070385	229665	Q3V1D3	Ampd1	AMP deaminase 1 [Source:UniProtKB/Swiss-Prot;Acc:Q3V1D3]	71.4364	62.5191	87.829	142.065	155.084	137.012	220.225	184.479	271.306	241.626
ENSMUSG00000035456	-1.14999414479127	0.000374266	0.00411285	down	5:+:98167198-98188991	5:+:98167198-98188991	ENSMUSG00000035456	77630	B2RU90	Prdm8	PR domain containing 8 [Source:MGI Symbol;Acc:MGI:1924880]	0.29288	0.19815	0.45846	0.43661	0.4461	0.42125	0.51377	0.58446	0.44135	0.71045
ENSMUSG00000038670	-1.3236021675587	0.00015623	0.00219215	down	7:-:44501699-44524656	7:-:44501699-44524656	ENSMUSG00000038670	233199	Q5XKE0	Mybpc2	Myosin-binding protein C, fast-type [Source:UniProtKB/Swiss-Prot;Acc:Q5XKE0]	248.879	212.244	315.341	568.736	603.981	447.663	1118.07	1047.03	1442.52	984.688
ENSMUSG00000114045	-1.0838937680169	0.000386664	0.00419868	down	12:-:108790035-108792743	12:-:108790035-108792743	ENSMUSG00000114045	102637400	-	Gm34220	predicted gene, 34220 [Source:MGI Symbol;Acc:MGI:5593379]	0.52489	0.54202	0.49681	0.45052	0.68845	0.36779	0.57548	0.76814	0.81423	0.8797
ENSMUSG00000076441	1.86498	0.000390576	0.00423018	up	2:+:31470207-31520672	2:+:31470207-31520672	ENSMUSG00000076441	11898	Q3UJ34	Ass1	Argininosuccinate synthase [Source:UniProtKB/Swiss-Prot;Acc:P16460]	1.89331	1.32138	1.5439	0.8781	0.92211	0.73859	0.10763	0.31346	0.18275	0.36371
ENSMUSG00000048442	1.60873	0.000364505	0.00403177	up	11:+:115899966-115906269	11:+:115899966-115906269	ENSMUSG00000048442	66528	Q8BT42	Smim5	Small integral membrane protein 5 [Source:UniProtKB/Swiss-Prot;Acc:Q8BT42]	7.69901	5.98738	4.61447	3.11629	3.46595	5.31076	1.3866	1.68254	0.49684	1.21699
ENSMUSG00000027555	1.69031	0.00038511	0.00418335	up	3:+:14641727-14663002	3:+:14641727-14663002	ENSMUSG00000027555	71934	Q9D6N1	Car13	Carbonic anhydrase 13 [Source:UniProtKB/Swiss-Prot;Acc:Q9D6N1]	1.89966	3.47969	2.02642	2.31904	2.7477	2.18974	0.22604	1.45369	0.30154	0.68196
ENSMUSG00000026357	1.75132	0.000401819	0.00431625	up	1:-:144752683-144775435	1:-:144752683-144775435	ENSMUSG00000026357	64214	Q99PG4	Rgs18	regulator of G-protein signaling 18 [Source:MGI Symbol;Acc:MGI:1927498]	1.47522	2.3683	1.58018	1.45484	2.75481	2.27213	0.30704	1.1177	0.21721	0.30878
ENSMUSG00000023267	-2.51265053275461	0.000381436	0.0041579	down	4:+:33062999-33095865	4:+:33062999-33095865	ENSMUSG00000023267	14409	P56476	Gabrr2	Gamma-aminobutyric acid receptor subunit rho-2 [Source:UniProtKB/Swiss-Prot;Acc:P56476]	1.10974	0.09621	0.36886	1.03752	1.28611	1.29543	1.75277	1.97709	2.42506	5.60098
ENSMUSG00000042759	1.71403	0.000361001	0.00400921	up	7:+:126584942-126589112	7:+:126584942-126589112	ENSMUSG00000042759	171504	Q8VBT6	Apobr	Apolipoprotein B receptor [Source:UniProtKB/Swiss-Prot;Acc:Q8VBT6]	3.52079	4.00606	4.62983	1.80176	2.2288	1.94273	0.46754	1.25146	0.33354	0.6804
ENSMUSG00000079523	1.44378	0.00019607	0.00256344	up	6:-:72957347-72958748	6:-:72957347-72958748	ENSMUSG00000079523	19240	A6H6H4	Tmsb10	Thymosin beta-10 [Source:UniProtKB/Swiss-Prot;Acc:Q6ZWY8]	453.422	457.471	272.327	157.818	174.072	270.09	110.774	123.199	64.207	84.3875
ENSMUSG00000025163	2.80716	0.000307508	0.00358735	up	11:-:121036747-121039418	11:-:121036747-121039418	ENSMUSG00000025163	12516	P50283	Cd7	T-cell antigen CD7 [Source:UniProtKB/Swiss-Prot;Acc:P50283]	0.71714	0.67032	0.82237	1.0205	1.69918	0.50912	0.1376	0.11131	0	0.1107
ENSMUSG00000044703	3.23844	0.000316841	0.00365933	up	14:-:59276913-59297522	14:-:59276913-59297522	ENSMUSG00000044703	219131	Q8BVM9	Phf11a	PHD finger protein 11A [Source:UniProtKB/Swiss-Prot;Acc:Q8BVM9]	0.6376	0.6357	0.45876	1.09113	1.19968	0.50348	0	0.27943	0	0.09263
ENSMUSG00000051212	1.49071	0.000401912	0.00431625	up	14:-:121952551-121965195	14:-:121952551-121965195	ENSMUSG00000051212	321019	Q3U6B2	Gpr183	G protein-coupled receptor 183	1.75901	2.57806	2.22331	1.02348	2.08388	1.30782	0.486	0.43683	0.45842	0.32584
ENSMUSG00000058672	1.47413	0.00023207	0.00290222	up	13:-:34074274-34078007	13:-:34074274-34078007	ENSMUSG00000058672	22151	Q7TMM9	Tubb2a	tubulin, beta 2A class IIA	98.8842	100.32	66.1996	33.5934	40.6931	50.5832	19.5598	20.7579	13.3481	18.0349
ENSMUSG00000054072	2.32293	0.000335648	0.00381266	up	18:+:60376029-60392627	18:+:60376029-60392627	ENSMUSG00000054072	60440	Q9QZ85	Iigp1	interferon inducible GTPase 1	6.19936	4.00706	5.44008	15.6624	12.4525	9.81251	1.01567	1.91939	0.64617	1.18554
ENSMUSG00000032532	1.20269	0.000418246	0.00445109	up	9:-:121489824-121495694	9:-:121489824-121495694	ENSMUSG00000032532	12424	P09240	Cck	Cholecystokinin Cholecystokinin-33 Cholecystokinin-12 Cholecystokinin-8 [Source:UniProtKB/Swiss-Prot;Acc:P09240]	2.10135	2.94867	2.7766	2.31343	2.21284	2.49139	0.59731	0.77311	0.96585	0.62473
ENSMUSG00000047878	1.02773	0.000322145	0.00369304	up	15:-:83226722-83251774	15:-:83226722-83251774	ENSMUSG00000047878	239559	Q3UF00	A4galt	alpha 1,4-galactosyltransferase	7.93618	9.64626	6.43069	6.2881	5.73093	4.71912	2.53214	2.29751	1.46626	3.41371
ENSMUSG00000002565	-1.11924951581107	0.00040158	0.00431584	down	12:-:40059769-40134228	12:-:40059769-40134228	ENSMUSG00000002565	20259	Q60604	Scin	scinderin [Source:MGI Symbol;Acc:MGI:1306794]	0.69426	0.70908	0.58685	0.83533	0.92278	0.612	1.2476	1.42977	1.05071	0.7319
ENSMUSG00000001025	1.55368	0.000225049	0.00283231	up	3:+:90612882-90624181	3:+:90612882-90624181	ENSMUSG00000001025	20200	Q545I9	S100a6	S100 calcium binding protein A6 (calcyclin) [Source:MGI Symbol;Acc:MGI:1339467]	162.044	227.528	153.928	72.1757	81.3303	86.0059	31.9322	44.9749	21.0226	47.0693
ENSMUSG00000026495	-1.03919528956354	0.000318979	0.00367201	down	1:+:178406085-178484513	1:+:178406085-178484513	ENSMUSG00000026495	68226	Q9CQ46	Efcab2	EF-hand calcium-binding domain-containing protein 2 [Source:UniProtKB/Swiss-Prot;Acc:Q9CQ46]	1.92071	1.4637	1.64606	1.96526	1.91311	2.42555	2.70408	1.91404	3.41601	3.47483
ENSMUSG00000052085	1.09491	0.000282667	0.00337059	up	19:+:24999529-25202432	19:+:24999529-25202432	ENSMUSG00000052085	76088	Q8C147	Dock8	dedicator of cytokinesis 8	5.00674	4.93352	4.28161	3.14182	5.68492	2.9745	1.1511	2.82586	1.19426	1.32493
ENSMUSG00000032548	1.0977	0.000314364	0.00363681	up	9:+:102988712-103096002	9:+:102988712-103096002	ENSMUSG00000032548	24059	Q3TED0	Slco2a1	solute carrier organic anion transporter family, member 2a1 [Source:MGI Symbol;Acc:MGI:1346021]	1.30471	2.36618	1.67769	1.36578	1.32804	1.2505	0.32611	0.75883	0.37222	0.79173
ENSMUSG00000026360	1.11316	0.000273276	0.00328403	up	1:-:143999338-144004161	1:-:143999338-144004161	ENSMUSG00000026360	19735	O08849	Rgs2	Regulator of G-protein signaling 2 [Source:UniProtKB/Swiss-Prot;Acc:O08849]	15.8074	14.6018	11.4031	8.5894	8.34333	11.393	6.37574	4.64192	2.58898	3.54458
ENSMUSG00000026193	1.4707	0.000181504	0.00242552	up	1:-:71585520-71653200	1:-:71585520-71653200	ENSMUSG00000026193	14268	P11276	Fn1	Fibronectin Anastellin [Source:UniProtKB/Swiss-Prot;Acc:P11276]	240.219	244.198	231.645	125.391	145.284	150.776	50.8096	105.408	62.1749	80.3705
ENSMUSG00000004885	1.80162	0.000419215	0.00445631	up	3:+:87948666-87953376	3:+:87948666-87953376	ENSMUSG00000004885	12904	P22935	Crabp2	Cellular retinoic acid-binding protein 2 [Source:UniProtKB/Swiss-Prot;Acc:P22935]	1.34447	1.80007	1.17467	0.8746	0.95567	1.26934	0.31447	0.14309	0.19069	0.28463
ENSMUSG00000037661	1.18558	0.000411337	0.00439971	up	3:+:30855950-30897192	3:+:30855950-30897192	ENSMUSG00000037661	71862	Q3U3F9	Gpr160	G protein-coupled receptor 160 [Source:MGI Symbol;Acc:MGI:1919112]	1.46569	1.91651	0.95519	1.41325	2.07797	1.48871	0.31964	0.56687	0.38764	0.62313
ENSMUSG00000033386	1.21824	0.000380401	0.00415533	up	3:+:116859464-116908177	3:+:116859464-116908177	ENSMUSG00000033386	20321	Q8K385	Frrs1	ferric chelate reductase 1 [Source:HGNC Symbol;Acc:HGNC:27622]	1.75571	2.21078	1.76111	1.01749	1.21815	1.17737	0.30063	0.76433	0.32118	0.50965
ENSMUSG00000028494	1.09503	0.000241657	0.00299154	up	4:-:86648386-86670060	4:-:86648386-86670060	ENSMUSG00000028494	101055843,11520	Q3U711	Plin2	Perilipin-2 [Source:UniProtKB/Swiss-Prot;Acc:P43883]	36.3807	60.464	42.9497	26.1364	26.6718	25.7421	11.7338	17.075	13.279	13.4462
ENSMUSG00000067203	1.01958	0.000455139	0.00473674	up	17:-:33974831-33978790	17:-:33974831-33978790	ENSMUSG00000067203	630499	-	H2-K2	histocompatibility 2, K region locus 2 [Source:MGI Symbol;Acc:MGI:95906]	3.63079	3.3304	3.01009	3.36787	3.44108	3.5993	1.43662	1.20223	0.84109	1.13589
ENSMUSG00000050822	-1.21987574916822	0.000469138	0.00484456	down	5:+:142692512-142722490	5:+:142692512-142722490	ENSMUSG00000050822	243328	Q8R139	Slc29a4	Equilibrative nucleoside transporter 4 [Source:UniProtKB/Swiss-Prot;Acc:Q8R139]	0.42585	0.33613	0.28938	0.26933	0.23123	0.38478	0.52656	0.70504	0.37434	0.54781
ENSMUSG00000068129	1.93502	0.000361871	0.00401278	up	2:+:150570415-150578944	2:+:150570415-150578944	ENSMUSG00000068129	13011	O89098	Cst7	Cystatin-F [Source:UniProtKB/Swiss-Prot;Acc:O89098]	0.77256	0.71891	0.94498	0.78176	1.1593	0.58503	0.0527	0.19186	0.12783	0.19081
ENSMUSG00000070691	2.52875	0.000476173	0.00490165	up	4:+:135120652-135177990	4:+:135120652-135177990	ENSMUSG00000070691	12399	Q3U1Q3	Runx3	Runt-related transcription factor 3 [Source:UniProtKB/Swiss-Prot;Acc:Q64131]	0.93384	0.97155	1.27262	0.50073	1.10631	0.89094	0.05193	0.52936	0.02519	0.18803
ENSMUSG00000097882	-1.12564157270158	0.000448501	0.00468263	down	8:+:77517056-77523898	8:+:77517056-77523898	ENSMUSG00000097882	70345	Q9DCH0	0610038B21Rik	RIKEN cDNA 0610038B21 gene	0.89295	0.57705	0.57309	1.08766	0.48976	0.4952	0.863	1.02665	0.7593	1.30695
ENSMUSG00000039193	1.34489	0.000475947	0.00490105	up	17:-:74426295-74459108	17:-:74426295-74459108	ENSMUSG00000039193	268973	Q3UP24	Nlrc4	NLR family, CARD domain containing 4	0.83359	1.05538	0.82272	0.56904	1.01889	0.79247	0.1354	0.36145	0.14778	0.35948
ENSMUSG00000027315	2.54803	0.000460749	0.00477815	up	2:+:119237362-119249527	2:+:119237362-119249527	ENSMUSG00000027315	20732	Q9R097	Spint1	Kunitz-type protease inhibitor 1 [Source:UniProtKB/Swiss-Prot;Acc:Q9R097]	0.84424	1.66516	0.89796	0.81251	0.67402	1.15606	0.05634	0.02279	0.18221	0.3853
ENSMUSG00000102418	3.7564	0.000390886	0.00423103	up	1:+:170277320-170286769	1:+:170277320-170286769	ENSMUSG00000102418	26904	Q149T1	Sh2d1b1	SH2 domain containing 1B1 [Source:MGI Symbol;Acc:MGI:1349420]	1.21767	1.83102	1.1598	0.42924	0.80405	0.41226	0.02043	0.17351	0	0.07395
ENSMUSG00000031504	1.41097	0.000483812	0.00495416	up	8:-:11453518-11478710	8:-:11453518-11478710	ENSMUSG00000031504	19332	Q3TPA7	Rab20	Ras-related protein Rab-20 [Source:UniProtKB/Swiss-Prot;Acc:P35295]	1.75113	2.58251	1.52465	1.84582	1.51268	2.18499	0.26132	0.5889	0.54329	0.63074
ENSMUSG00000060224	1.03462	0.000390985	0.00423103	up	19:-:42725858-42752775	19:-:42725858-42752775	ENSMUSG00000060224	74580	Q3U4I7	Pyroxd2	pyridine nucleotide-disulphide oxidoreductase domain 2	3.97274	4.20443	3.5184	2.38897	4.4557	3.58117	1.03299	2.04193	0.74761	1.4678
ENSMUSG00000028417	1.66755	0.000482144	0.00494746	up	4:+:53779705-53788712	4:+:53779705-53788712	ENSMUSG00000028417	21350	Q2TB09	Tal2	T cell acute lymphocytic leukemia 2 [Source:MGI Symbol;Acc:MGI:99540]	1.82893	2.04504	0.76661	1.08103	1.98446	1.6415	0.20989	0.27591	0.38182	0.44328
ENSMUSG00000095930	-1.10542325684352	0.000423289	0.00449034	down	13:-:119710094-119755882	13:-:119710094-119755882	ENSMUSG00000095930	245269	Q8BHI9	Nim1k	NIM1 serine/threonine protein kinase	0.41989	0.34687	0.45246	0.28073	0.41216	0.43979	0.8839	0.61076	0.48387	0.42964
ENSMUSG00000059422	-1.270029567239	0.000319129	0.00367208	down	9:-:78820638-78821838	9:-:78820638-78821838	ENSMUSG00000059422	666456	-	Gm8116	predicted gene 8116 [Source:MGI Symbol;Acc:MGI:3648797]	10.4863	7.75707	10.5165	11.3386	7.31356	12.6624	9.60568	21.3165	28.1262	19.0594
ENSMUSG00000026162	-1.03939921113782	0.000441723	0.00463905	down	1:-:74967139-75125200	1:-:74967139-75125200	ENSMUSG00000026162	75570	Q3KNJ2	Nhej1	non-homologous end-joining factor 1 [Source:RefSeq peptide;Acc:NP_083618]	3.27044	3.07957	2.96322	2.12583	1.72198	2.86121	4.04386	3.15849	3.60768	4.15096
ENSMUSG00000027562	-1.77330729746585	0.000335234	0.00380972	down	3:+:14886273-14900770	3:+:14886273-14900770	ENSMUSG00000027562	12349	P00920	Car2	Mus musculus carbonic anhydrase 2 (Car2), transcript variant 2, mRNA. [Source:RefSeq mRNA;Acc:NM_001357334]	6.58371	2.9685	7.39481	2.46648	2.7572	2.29505	5.75015	20.5157	5.93267	11.1599
ENSMUSG00000029605	1.61347	0.000496412	0.0050514	up	5:+:120812635-120824163	5:+:120812635-120824163	ENSMUSG00000029605	23961	Q60856	Oas1b	Mus musculus 2'-5' oligoadenylate synthetase 1B (Oas1b), transcript variant 1, coding, mRNA. [Source:RefSeq mRNA;Acc:NM_001083925]	1.93749	1.11837	1.55915	2.38622	2.68794	2.02704	0.46957	0.79138	0.2531	0.31482
ENSMUSG00000022831	1.38389	0.000329385	0.00375262	up	16:+:36934983-36963212	16:+:36934983-36963212	ENSMUSG00000022831	15163	P49710	Hcls1	Hematopoietic lineage cell-specific protein [Source:UniProtKB/Swiss-Prot;Acc:P49710]	17.2963	21.917	16.9949	9.38714	11.6987	7.35196	3.39579	5.89365	3.21972	3.37782
ENSMUSG00000047129	-2.22761993772361	0.000464446	0.00480458	down	10:+:87058045-87230589	10:+:87058045-87230589	ENSMUSG00000047129	76640	E9Q9Q5	1700113H08Rik	RIKEN cDNA 1700113H08 gene [Source:MGI Symbol;Acc:MGI:1923890]	0.03276	0.098	0.20038	0.37297	0.23288	0.16916	0.56995	0.4475	0.56923	0.44506
ENSMUSG00000016206	1.05551	0.000433699	0.00457728	up	17:+:37270220-37274484	17:+:37270220-37274484	ENSMUSG00000016206	14991	Q31093	H2-M3	histocompatibility 2, M region locus 3	5.9682	6.76029	5.75952	8.17449	7.78168	4.41253	2.45736	2.71873	1.22712	2.26779
ENSMUSG00000019689	-1.26882738535513	0.000320034	0.00367838	down	6:+:38533502-38539449	6:+:38533502-38539449	ENSMUSG00000019689	66117	Q9CR13	Fmc1	formation of mitochondrial complex V assembly factor 1 homolog [Source:HGNC Symbol;Acc:HGNC:26946]	26.5338	31.0845	33.5825	14.6369	13.8834	17.277	60.1869	49.6037	30.7333	28.2164
ENSMUSG00000062257	-1.13716660253294	0.000392433	0.00423932	down	9:+:27790775-28925410	9:+:27790775-28925410	ENSMUSG00000062257	330908	Q6DFY2	Opcml	opioid binding protein/cell adhesion molecule-like [Source:MGI Symbol;Acc:MGI:97397]	0.33228	0.27898	0.27809	0.65035	0.61326	0.57067	0.6192	0.78175	0.58164	0.69542
ENSMUSG00000034792	1.44451	0.000517482	0.00523126	up	10:-:81502306-81524225	10:-:81502306-81524225	ENSMUSG00000034792	14676	P30678	Gna15	guanine nucleotide binding protein, alpha 15 [Source:MGI Symbol;Acc:MGI:95770]	1.64122	2.56123	2.40028	1.20346	2.33883	2.18602	0.29208	0.97465	0.35422	0.64622
ENSMUSG00000085519	-2.1964949079172	0.000445118	0.00465895	down	2:+:73357268-73364333	2:+:73357268-73364333	ENSMUSG00000085519	-	-	Gm13703	predicted gene 13703 [Source:MGI Symbol;Acc:MGI:3651307]	0.1131	0.90212	0.23057	0.71531	0.26798	0.35038	1.27311	1.40439	1.12288	1.11738
ENSMUSG00000033355	1.54696	0.000441716	0.00463905	up	16:+:23520291-23614222	16:+:23520291-23614222	ENSMUSG00000033355	67775	Q9ER80	Rtp4	Receptor-transporting protein 4 [Source:UniProtKB/Swiss-Prot;Acc:Q9ER80]	5.90995	3.80154	4.78529	7.11372	8.94942	7.82537	1.63384	2.57436	0.76892	1.38316
ENSMUSG00000022577	1.91887	0.000525923	0.00529808	up	15:-:75551268-75567255	15:-:75551268-75567255	ENSMUSG00000022577	23934	Q544M1	Ly6h	Lymphocyte antigen 6H [Source:UniProtKB/Swiss-Prot;Acc:Q9WUC3]	2.25861	1.58112	1.17561	1.97551	1.18131	1.58796	0.47946	0.37294	0.37273	0.08902
ENSMUSG00000038676	-1.54284924374489	0.000547362	0.00546541	down	5:-:31138063-31138829	5:-:31138063-31138829	ENSMUSG00000038676	22226	P81615	Ucn	urocortin [Source:MGI Symbol;Acc:MGI:1276123]	0.70531	1.60736	0.71894	0.89215	1.43242	0.93643	1.4435	1.75159	2.50086	3.11077
ENSMUSG00000030921	1.3815	0.000375425	0.0041225	up	7:-:104409025-104465193	7:-:104409025-104465193	ENSMUSG00000030921	20128	P15533	Trim30a	Mus musculus tripartite motif-containing 30A (Trim30a), transcript variant 2, mRNA. [Source:RefSeq mRNA;Acc:NM_001357467]	5.73173	5.3329	4.72182	8.90627	11.5611	8.17658	1.45368	3.15976	1.44102	2.42554
ENSMUSG00000070583	-1.1341831010054	0.000492423	0.00502252	down	4:+:147868979-147870358	4:+:147868979-147870358	ENSMUSG00000070583	14349	P70213	Fv1	Friend virus susceptibility protein 1 [Source:UniProtKB/Swiss-Prot;Acc:P70213]	2.35514	1.13738	1.23783	2.83935	2.8337	2.46999	2.78658	3.83826	2.5574	3.04477
ENSMUSG00000032369	1.48762	0.000523567	0.00528184	up	9:+:92249750-92272278	9:+:92249750-92272278	ENSMUSG00000032369	22038	Q9JJ00	Plscr1	Phospholipid scramblase 1 [Source:UniProtKB/Swiss-Prot;Acc:Q9JJ00]	3.65091	3.98967	3.27991	2.26986	1.95488	1.66138	0.56989	1.15255	0.35837	0.78965
ENSMUSG00000025534	1.09439	0.000307582	0.00358735	up	5:-:129989011-130003049	5:-:129989011-130003049	ENSMUSG00000025534	110006	P12265	Gusb	glucuronidase, beta [Source:MGI Symbol;Acc:MGI:95872]	23.9509	27.2307	20.43	12.7678	15.0139	12.2798	5.86159	9.8856	5.29337	6.96353
ENSMUSG00000034127	-1.12876098258993	0.000416102	0.00444119	down	10:+:115816832-115849893	10:+:115816832-115849893	ENSMUSG00000034127	216350	Q8R3G9	Tspan8	tetraspanin 8	3.10305	3.59955	3.68003	4.52887	5.33748	4.46755	10.9	5.40913	4.3693	6.04286
ENSMUSG00000053353	-2.04645217831624	0.000483474	0.00495244	down	2:+:163471957-163473005	2:+:163471957-163473005	ENSMUSG00000053353	69517	Q9D7N7	2310001K24Rik	RIKEN cDNA 2310001K24 gene	0.2745	0.27369	0.20985	0.26041	0.4065	0.07086	0.70224	1.27818	0.51099	0.59323
ENSMUSG00000028525	-1.14313470455127	0.000283232	0.00337459	down	4:+:102087543-102607259	4:+:102087543-102607259	ENSMUSG00000028525	18578	B1AWD0	Pde4b	phosphodiesterase 4B, cAMP specific [Source:MGI Symbol;Acc:MGI:99557]	4.30883	4.08986	5.20578	8.54027	7.81645	8.44202	8.98577	12.08	15.5465	10.4225
ENSMUSG00000026069	1.17727	0.000442917	0.00464089	up	1:+:40429570-40465415	1:+:40429570-40465415	ENSMUSG00000026069	17082	P14719	Il1rl1	Interleukin-1 receptor-like 1 [Source:UniProtKB/Swiss-Prot;Acc:P14719]	1.57637	3.06258	2.34266	1.71441	1.82387	2.16788	0.3392	0.85979	0.78617	0.80052
ENSMUSG00000054855	-1.11744787518989	0.000557841	0.00555111	down	15:-:98663421-98677461	15:-:98663421-98677461	ENSMUSG00000054855	223881	Q8BLR7	Rnd1	Rho-related GTP-binding protein Rho6 [Source:UniProtKB/Swiss-Prot;Acc:Q8BLR7]	0.61617	0.69966	0.54084	0.82269	0.40554	0.38884	0.98082	0.82886	0.63723	0.95116
ENSMUSG00000015854	3.41923	0.000480825	0.00493739	up	3:+:87357881-87371073	3:+:87357881-87371073	ENSMUSG00000015854	11801	Q9QWK4	Cd5l	CD5 antigen-like [Source:UniProtKB/Swiss-Prot;Acc:Q9QWK4]	0.92287	0.96986	0.22882	0.31549	0.59098	0.25756	0.10209	0	0	0.0616
ENSMUSG00000083118	-2.65724791601155	0.000500085	0.00508347	down	1:+:60792490-60793832	1:+:60792490-60793832	ENSMUSG00000083118	100416674	-	Gm11609	predicted gene 11609 [Source:MGI Symbol;Acc:MGI:3694969]	0.19212	0	0.2611	0	0.30346	0.19839	0.52425	0.4771	0.63578	0.86992
ENSMUSG00000085436	-1.13909752721498	0.000579134	0.00570869	down	2:+:164911354-164919953	2:+:164911354-164919953	ENSMUSG00000085436	629777	-	Zfp335os	zinc finger protein 335, opposite strand [Source:MGI Symbol;Acc:MGI:3649775]	1.03719	0.71592	1.78916	1.21102	1.46505	1.07104	1.83697	2.27858	1.5842	1.52719
ENSMUSG00000023964	-1.19808316967481	0.000524981	0.00529259	down	6:-:3685680-3764714	6:-:3685680-3764714	ENSMUSG00000023964	12311	Q60755	Calcr	Mus musculus calcitonin receptor (Calcr), transcript variant 3, mRNA. [Source:RefSeq mRNA;Acc:NM_001355192]	0.51925	0.56948	0.48958	1.36285	1.09189	0.65684	1.04941	0.98325	1.25657	1.29851
ENSMUSG00000045763	1.27343	0.000358538	0.00398942	up	15:-:25363277-25413764	15:-:25363277-25413764	ENSMUSG00000045763	70350	Q91XV3	Basp1	brain abundant, membrane attached signal protein 1	29.8023	41.7353	29.7854	16.2425	16.2307	18.1934	8.76876	10.2637	5.9916	6.74268
ENSMUSG00000057135	2.95013	0.000490939	0.00501313	up	11:-:70790932-70812586	11:-:70790932-70812586	ENSMUSG00000057135	327957	Q3UU41	Scimp	SLP adapter and CSK-interacting membrane protein [Source:UniProtKB/Swiss-Prot;Acc:Q3UU41]	1.36361	1.40644	0.43136	0.89215	1.33692	1.01966	0.09623	0.05839	0	0.34841
ENSMUSG00000086586	2.18677	0.000446624	0.00466971	up	11:-:78278738-78279066	11:-:78278738-78279066	ENSMUSG00000086586	-	-	Gm11192	predicted gene 11192 [Source:MGI Symbol;Acc:MGI:3709388]	0.67262	0.67062	1.37122	0.42539	1.9921	0.69457	0	0	0	0
ENSMUSG00000029661	1.10955	0.000222853	0.00281194	up	6:+:4504814-4541544	6:+:4504814-4541544	ENSMUSG00000029661	12843	Q3TX57	Col1a2	Collagen alpha-2(I) chain [Source:UniProtKB/Swiss-Prot;Acc:Q01149]	733.823	669.561	678.693	442.079	434.392	505.213	366.07	533.062	251.037	325.759
ENSMUSG00000001131	4.36951	0.000520622	0.00525938	up	X:+:20870166-20874735	X:+:20870166-20874735	ENSMUSG00000001131	21857	P12032	Timp1	Metalloproteinase inhibitor 1 [Source:UniProtKB/Swiss-Prot;Acc:P12032]	90.814	187.531	122.064	27.6324	34.349	26.9876	1.34596	9.58638	1.13552	1.76557
ENSMUSG00000023809	-1.10523742612984	0.000301152	0.00353488	down	17:+:7170115-7303313	17:+:7170115-7303313	ENSMUSG00000023809	20112	Q9WUT3	Rps6ka2	ribosomal protein S6 kinase, polypeptide 2	10.4403	6.5023	12.644	16.6648	15.6972	13.9736	19.9344	20.21	27.4874	22.4208
ENSMUSG00000072844	2.32205	0.000562822	0.00557794	up	X:-:169975043-169978917	X:-:169975043-169978917	ENSMUSG00000072844	654820	-	G530011O06Rik	RIKEN cDNA G530011O06 gene	0.51209	0.34038	1.02222	0.62075	0.85945	1.16778	0.04367	0.10598	0.10592	0.13175
ENSMUSG00000104279	-1.22988701739172	0.000616417	0.00599543	down	1:+:178339601-178341470	1:+:178339601-178341470	ENSMUSG00000104279	-	-	Gm38300	predicted gene, 38300 [Source:MGI Symbol;Acc:MGI:5611528]	0.6246	0.37906	0.71971	0.4122	0.61127	0.47673	0.69473	0.74185	1.01104	1.1067
ENSMUSG00000045008	-1.34396348175476	0.000606428	0.00591995	down	10:+:43174704-43176562	10:+:43174704-43176562	ENSMUSG00000045008	74530	Q8CE20	9030612E09Rik	RIKEN cDNA 9030612E09 gene	0.46439	0.59919	1.28087	0.62196	1.32686	0.81805	1.56541	1.08544	1.32213	1.61927
ENSMUSG00000064356	-1.42899650189557	0.000633073	0.00610678	down	MT:+:7766-7969	MT:+:7766-7969	ENSMUSG00000064356	17706	P03930	mt-Atp8	mitochondrially encoded ATP synthase 8 [Source:MGI Symbol;Acc:MGI:99926]	4.72976	4.9639	5.58236	3.14875	3.53892	4.8841	11.7178	5.56386	6.79645	10.4522
ENSMUSG00000024644	1.099	0.000348689	0.00391853	up	18:-:84667470-84685633	18:-:84667470-84685633	ENSMUSG00000024644	66054	Q9D1A2	Cndp2	CNDP dipeptidase 2 (metallopeptidase M20 family)	41.2684	56.1752	44.826	24.2206	26.2053	25.2919	13.2674	16.9025	10.8258	12.1046
ENSMUSG00000026259	1.81162	0.000646225	0.00621114	up	1:-:87476834-87573870	1:-:87476834-87573870	ENSMUSG00000026259	53972	E9QK62	Ngef	Ephexin-1 [Source:UniProtKB/Swiss-Prot;Acc:Q8CHT1]	0.46816	1.62073	0.75558	0.67442	0.66247	0.56401	0.14638	0.19377	0.08069	0.1606
ENSMUSG00000056271	3.19779	0.000530975	0.00533635	up	9:-:57607085-57620774	9:-:57607085-57620774	ENSMUSG00000056271	235416	Q8VCD3	Lman1l	Protein ERGIC-53-like [Source:UniProtKB/Swiss-Prot;Acc:Q8VCD3]	0.54249	0.87141	0.21504	0.38121	0.78549	0.62243	0	0.07485	0	0.18609
ENSMUSG00000078783	2.73864	0.000520116	0.00525608	up	3:-:15296551-15332302	3:-:15296551-15332302	ENSMUSG00000078783	751864	Q1AN91	Gm9733	predicted gene 9733	1.39693	1.47471	1.84272	1.45515	1.07084	0.42427	0.16817	0.10203	0	0.20296
ENSMUSG00000019832	1.19592	0.000483432	0.00495244	up	10:-:10545002-10558265	10:-:10545002-10558265	ENSMUSG00000019832	67844	Q9CZE3	Rab32	RAB32, member RAS oncogene family [Source:MGI Symbol;Acc:MGI:1915094]	7.27327	12.0356	8.03344	4.39398	5.50431	5.20138	1.62185	2.83069	1.69746	2.49351
ENSMUSG00000039745	1.22579	0.000560671	0.00556437	up	7:+:49759115-49773975	7:+:49759115-49773975	ENSMUSG00000039745	53415	Q9Z2G9	Htatip2	HIV-1 Tat interactive protein 2 [Source:MGI Symbol;Acc:MGI:1859271]	6.39801	5.62853	3.65722	2.50718	3.83441	4.09362	1.07834	1.9939	0.99639	1.11545
ENSMUSG00000005054	1.61081	0.000396989	0.00427749	up	10:+:78425669-78427622	10:+:78425669-78427622	ENSMUSG00000005054	13014	Q62426	Cstb	cystatin B	119.588	163.483	105.588	47.8297	54.0756	60.7884	24.6472	28.6528	14.5274	20.1764
ENSMUSG00000074093	-1.11741589346029	0.000429502	0.00454422	down	7:-:51997171-52006018	7:-:51997171-52006018	ENSMUSG00000074093	75744	Q3UZP4	Svip	Small VCP/p97-interacting protein [Source:UniProtKB/Swiss-Prot;Acc:Q3UZP4]	2.21042	1.96214	2.54385	3.73394	4.40948	4.41784	4.80112	4.26755	5.25623	5.44183
ENSMUSG00000074896	2.54995	0.000560693	0.00556437	up	19:+:34583531-34588731	19:+:34583531-34588731	ENSMUSG00000074896	15959	Q64345	Ifit3	Interferon-induced protein with tetratricopeptide repeats 3 [Source:UniProtKB/Swiss-Prot;Acc:Q64345]	8.93426	4.52639	7.62365	22.8226	15.5144	13.1325	0.80406	2.45724	0.86677	1.47349
ENSMUSG00000025241	-1.03035181304803	0.000285381	0.00339194	down	9:-:123789500-123851899	9:-:123789500-123851899	ENSMUSG00000025241	17281	Q8VDC1	Fyco1	FYVE and coiled-coil domain-containing protein 1 [Source:UniProtKB/Swiss-Prot;Acc:Q8VDC1]	21.4202	13.7749	25.7592	31.3127	31.1534	28.143	42.6775	39.7469	55.8248	48.5386
ENSMUSG00000026832	1.60519	0.000594788	0.00582574	up	2:-:58129137-58195532	2:-:58129137-58195532	ENSMUSG00000026832	227929	Q91VY6	Cytip	Cytohesin-interacting protein [Source:UniProtKB/Swiss-Prot;Acc:Q91VY6]	0.98644	1.31384	1.08225	1.00962	2.37292	0.87089	0.16952	0.64516	0.17755	0.28827
ENSMUSG00000077274	-1.99403189353116	0.000472125	0.00487025	down	1:+:86087301-86087422	1:+:86087301-86087422	ENSMUSG00000077274	-	-	Gm22786	predicted gene, 22786 [Source:MGI Symbol;Acc:MGI:5452563]	0	0	0	0.52651	0	0	0.42595	0.51686	0.51657	1.02808
ENSMUSG00000003949	-1.20878795432911	0.000449665	0.00468934	down	11:-:90336536-90390895	11:-:90336536-90390895	ENSMUSG00000003949	217082	Q8BW74	Hlf	Hepatic leukemia factor [Source:UniProtKB/Swiss-Prot;Acc:Q8BW74]	1.33018	0.73511	0.95299	1.67292	1.42277	2.33118	1.99899	2.18024	2.72613	2.17773
ENSMUSG00000020057	1.2208	0.000453855	0.00472543	up	10:-:88322804-88379080	10:-:88322804-88379080	ENSMUSG00000020057	71712	Q9DC58	Dram1	DNA damage-regulated autophagy modulator protein 1 [Source:UniProtKB/Swiss-Prot;Acc:Q9DC58]	5.62028	9.44461	4.87888	10.5897	9.36505	8.05971	1.50181	3.47901	2.44222	2.7186
ENSMUSG00000111085	-1.27010652079264	0.000640741	0.0061645	down	9:+:14663022-14665099	9:+:14663022-14665099	ENSMUSG00000111085	665374	-	Gm7607	predicted gene 7607	2.64697	2.54136	2.69811	2.6041	3.01969	3.54323	7.4237	3.53022	4.37988	4.35844
ENSMUSG00000032648	-1.00542325943142	0.000255409	0.00311648	down	19:+:6384399-6398459	19:+:6384399-6398459	ENSMUSG00000032648	19309	Q9WUB3	Pygm	Glycogen phosphorylase, muscle form [Source:UniProtKB/Swiss-Prot;Acc:Q9WUB3]	368.608	245.481	451.46	558.249	579.256	469.204	963.242	919.442	1238.91	909.438
ENSMUSG00000111894	-1.8130121297888	0.000681841	0.00646226	down	10:-:23573020-23609431	10:-:23573020-23609431	ENSMUSG00000111894	-	-	Gm47843	predicted gene, 47843 [Source:MGI Symbol;Acc:MGI:6097047]	0.51181	0.22679	0.57966	0.79124	0.80844	0.82212	1.92035	1.83593	1.5526	0.7725
ENSMUSG00000034765	1.01337	0.000567489	0.0056109	up	19:+:53529109-53542431	19:+:53529109-53542431	ENSMUSG00000034765	240672	Q1HL35	Dusp5	dual specificity phosphatase 5 [Source:HGNC Symbol;Acc:HGNC:3071]	2.7722	4.31998	4.47935	3.68835	3.01659	3.28677	1.32384	1.78488	0.68806	1.29332
ENSMUSG00000032661	3.2371	0.000657871	0.00629665	up	5:-:120753098-120777661	5:-:120753098-120777661	ENSMUSG00000032661	246727	Q8VI93	Oas3	2'-5'-oligoadenylate synthase 3 [Source:UniProtKB/Swiss-Prot;Acc:Q8VI93]	0.48132	0.15758	0.42471	0.51795	0.81702	0.66765	0.0147	0.14272	0.00892	0.04436
ENSMUSG00000078502	1.13479	0.000634562	0.00611667	up	4:+:145585166-145625345	4:+:145585166-145625345	ENSMUSG00000078502	433801	B1ASQ7	Gm13212	predicted gene 13212	1.45497	1.77458	1.1519	1.21501	2.02491	1.86712	0.33247	0.54375	0.63109	0.48845
ENSMUSG00000045659	1.04526	0.000497251	0.00505818	up	7:-:116123485-116308376	7:-:116123485-116308376	ENSMUSG00000045659	233765	Q3UIL6	Plekha7	Pleckstrin homology domain-containing family A member 7 [Source:UniProtKB/Swiss-Prot;Acc:Q3UIL6]	1.60598	1.21754	1.31681	1.28638	1.23738	1.46781	0.32546	0.33155	0.57988	0.83889
ENSMUSG00000074577	1.22635	0.000565143	0.00559724	up	2:-:167980164-168010618	2:-:167980164-168010618	ENSMUSG00000074577	69553	A1L3T7	Ripor3	RIPOR family member 3 [Source:UniProtKB/Swiss-Prot;Acc:A1L3T7]	3.42221	3.49555	2.98824	2.55788	2.12635	1.75458	1.10201	1.05491	0.37124	0.85706
ENSMUSG00000112188	-1.62689369295298	0.0006197	0.00602024	down	10:+:95730183-95739356	10:+:95730183-95739356	ENSMUSG00000112188	-	-	Gm47708	predicted gene, 47708 [Source:MGI Symbol;Acc:MGI:6096827]	1.3982	1.05948	2.22333	2.90046	4.50549	4.85126	6.29543	3.68065	4.37265	7.183
ENSMUSG00000051319	-1.06766792814621	0.000393433	0.00424699	down	2:-:127791388-127792488	2:-:127791388-127792488	ENSMUSG00000051319	67885	-	1500011K16Rik	RIKEN cDNA 1500011K16 gene [Source:MGI Symbol;Acc:MGI:1915135]	33.7705	40.7586	43.6756	25.3726	22.5606	24.0568	84.1198	54.3079	35.0558	41.6258
ENSMUSG00000087107	1.68117	0.000700526	0.00657973	up	11:+:83223576-83226604	11:+:83223576-83226604	ENSMUSG00000087107	100043636	-	AI662270	expressed sequence AI662270	1.8442	2.60764	2.06781	1.06033	1.43005	0.95219	0.25734	0.77026	0.18725	0.33127
ENSMUSG00000080893	-1.07486698471004	0.00038072	0.00415713	down	5:+:130188395-130188796	5:+:130188395-130188796	ENSMUSG00000080893	-	-	Gm15920	predicted gene 15920 [Source:MGI Symbol;Acc:MGI:3801934]	59.8781	104.664	128.765	60.2398	78.4196	92.2262	224.539	145.565	101.43	132.29
ENSMUSG00000046828	-1.8272069593036	0.000698579	0.00657333	down	1:-:44204070-44218961	1:-:44204070-44218961	ENSMUSG00000046828	403183	Q8CDZ2	Mettl21e	Protein-lysine methyltransferase METTL21E [Source:UniProtKB/Swiss-Prot;Acc:Q8CDZ2]	0.34616	0.14061	0.26137	0.25947	0.31896	0.56928	0.28863	1.06661	0.89099	1.09245
ENSMUSG00000044556	-2.35117522825645	0.000625349	0.00605621	down	4:-:115779834-115781018	4:-:115779834-115781018	ENSMUSG00000044556	75173	D2D552	Tex38	Testis-expressed protein 38 [Source:UniProtKB/Swiss-Prot;Acc:A2A8T7]	0.12664	0.44192	0.19363	0.16019	0	0.13077	0.71275	0.55037	0.47148	0.54737
ENSMUSG00000094628	-2.04121786284541	0.000721474	0.0067333	down	14:+:4726775-4747493	14:+:4726775-4747493	ENSMUSG00000094628	100041283	E9PUT9,J3QPB3	Gm3252	predicted gene 3252	0.05193	0.15531	0.07939	0.3284	0.30757	0.32172	0.47821	0.61252	0.25776	0.89773
ENSMUSG00000032348	-1.04557820523177	0.000596309	0.00583674	down	9:+:78182774-78209349	9:+:78182774-78209349	ENSMUSG00000032348	14860	P24472	Gsta4	Glutathione S-transferase A4 [Source:UniProtKB/Swiss-Prot;Acc:P24472]	3.52992	2.15965	3.55722	3.09503	2.7087	4.80491	6.40338	4.73177	3.78329	3.91338
ENSMUSG00000069622	-1.20369130028795	0.000744307	0.00689803	down	10:+:59395632-59396757	10:+:59395632-59396757	ENSMUSG00000069622	100039174	Q9CXU4	Gm10273	translocase of inner mitochondrial membrane 23 homolog pseudogene	0.6314	0.53959	0.50568	0.45637	0.48087	0.51229	0.73841	1.12002	0.83954	0.77974
ENSMUSG00000097047	-1.15551575781091	0.000715443	0.00668341	down	17:-:84954967-84957710	17:-:84954967-84957710	ENSMUSG00000097047	68531	-	1110020A21Rik	RIKEN cDNA 1110020A21 gene	1.54789	1.30586	2.306	1.43078	1.83376	1.96726	2.80238	1.92202	2.73365	3.16139
ENSMUSG00000068115	1.07932	0.000658131	0.00629665	up	2:-:150934519-151039382	2:-:150934519-151039382	ENSMUSG00000068115	78177	Q6ZQ12	Ninl	Ninein-like protein [Source:UniProtKB/Swiss-Prot;Acc:Q6ZQ12]	1.62109	1.25048	0.91317	0.92812	0.9097	1.04844	0.21827	0.54031	0.34941	0.40039
ENSMUSG00000105452	-1.35692075513987	0.00072442	0.00675218	down	3:+:57362388-57363434	3:+:57362388-57363434	ENSMUSG00000105452	383862	-	Gm5276	predicted gene 5276 [Source:MGI Symbol;Acc:MGI:3646382]	1.26108	1.0639	0.69216	1.04297	1.78129	2.1036	3.07725	2.22838	1.92616	1.79694
ENSMUSG00000030589	1.21709	0.000639884	0.00616233	up	7:+:29134851-29153961	7:+:29134851-29153961	ENSMUSG00000030589	233046	Q8BTM9	Rasgrp4	RAS guanyl releasing protein 4 [Source:MGI Symbol;Acc:MGI:2386851]	1.22906	1.18562	1.67583	0.86817	1.58842	1.28565	0.19601	0.66397	0.33675	0.50265
ENSMUSG00000084939	1.60484	0.000761781	0.0070222	up	4:-:95464724-95487394	4:-:95464724-95487394	ENSMUSG00000084939	329892	-	Gm830	predicted gene 830 [Source:MGI Symbol;Acc:MGI:2685676]	0.52204	0.47711	0.44344	0.71535	0.77306	0.89845	0.07419	0.25208	0.08998	0.21489
ENSMUSG00000022439	1.94906	0.000663026	0.00633401	up	15:+:84324026-84342978	15:+:84324026-84342978	ENSMUSG00000022439	64099	Q8CEF2	Parvg	Gamma-parvin [Source:UniProtKB/Swiss-Prot;Acc:Q9ERD8]	4.73314	5.93162	5.0256	2.12036	4.10812	1.86679	0.47089	1.34685	0.28553	1.07566
ENSMUSG00000021069	1.02231	0.000487639	0.0049829	up	12:-:70190811-70231488	12:-:70190811-70231488	ENSMUSG00000021069	110095	Q9ET01	Pygl	Glycogen phosphorylase, liver form [Source:UniProtKB/Swiss-Prot;Acc:Q9ET01]	4.36753	4.86858	4.80475	3.60533	3.54251	3.07262	0.99485	3.0454	0.95058	1.67356
ENSMUSG00000038527	1.12208	0.000728537	0.00678408	up	6:+:124493113-124510643	6:+:124493113-124510643	ENSMUSG00000038527	232371	Q3UZ09	C1rl	Complement C1r subcomponent-like protein [Source:UniProtKB/Swiss-Prot;Acc:Q3UZ09]	1.87272	1.96808	1.46177	0.98166	1.75888	1.2718	0.37982	0.79607	0.35594	0.4792
ENSMUSG00000009075	-1.42619471282738	0.000776957	0.00712554	down	11:-:4736892-4746778	11:-:4736892-4746778	ENSMUSG00000009075	192650	Q5NCJ7	Cabp7	Calcium-binding protein 7 [Source:UniProtKB/Swiss-Prot;Acc:Q91ZM8]	0.28986	0.25046	0.57121	0.31775	0.22893	0.37913	0.69209	0.52788	0.79137	0.50113
ENSMUSG00000045994	-1.10871208503777	0.000696394	0.00656317	down	9:+:26733728-26763101	9:+:26733728-26763101	ENSMUSG00000045994	76898	Q6PIG8	B3gat1	Galactosylgalactosylxylosylprotein 3-beta-glucuronosyltransferase 1 [Source:UniProtKB/Swiss-Prot;Acc:Q9CW73]	0.52216	0.36749	0.41745	0.45327	0.78841	0.40176	0.62862	0.53395	0.94024	0.79656
ENSMUSG00000000204	2.17132	0.000782066	0.00715067	up	11:+:83175186-83190216	11:+:83175186-83190216	ENSMUSG00000000204	20558	Q3UV66	Slfn4	schlafen 4 [Source:MGI Symbol;Acc:MGI:1329010]	1.29391	1.26452	2.69004	0.63197	0.97133	0.74082	0.09177	0.30224	0.11129	0.28477
ENSMUSG00000032033	-1.51004062415443	0.000676745	0.00642437	down	9:-:31846044-31913462	9:-:31846044-31913462	ENSMUSG00000032033	12023	O08686	Barx2	Homeobox protein BarH-like 2 [Source:UniProtKB/Swiss-Prot;Acc:O08686]	2.11594	1.62083	2.57766	0.97918	0.76425	0.79939	2.66695	1.73023	3.01018	3.66464
ENSMUSG00000112830	2.41179	0.000627713	0.00607141	up	12:-:80190160-80191428	12:-:80190160-80191428	ENSMUSG00000112830	-	-	Gm47765	predicted gene, 47765 [Source:MGI Symbol;Acc:MGI:6096917]	0.29354	1.02434	0.14961	0.3713	0.34775	1.21248	0	0	0	0
ENSMUSG00000003665	1.62659	0.000814988	0.00737341	up	17:-:17843328-17855188	17:-:17843328-17855188	ENSMUSG00000003665	15116	Q3UUP6	Has1	hyaluronan synthase 1	0.68034	1.16283	0.84209	1.29084	1.3817	1.75636	0.19891	0.18103	0.24123	0.42009
ENSMUSG00000022367	1.05579	0.000698722	0.00657333	up	15:-:56665627-56694539	15:-:56665627-56694539	ENSMUSG00000022367	15117	P70312	Has2	Hyaluronan synthase 2 [Source:UniProtKB/Swiss-Prot;Acc:P70312]	1.54613	1.76859	1.91808	1.95569	1.68969	1.58421	0.65003	0.77389	0.25286	0.79927
ENSMUSG00000079625	3.91863	0.000721443	0.0067333	up	16:+:32400506-32408227	16:+:32400506-32408227	ENSMUSG00000079625	277203	B2RWD4	Tm4sf19	transmembrane 4 L six family member 19 [Source:MGI Symbol;Acc:MGI:3645933]	1.0504	1.57091	1.64721	0.35771	1.38798	0.58406	0	0.80264	0	0
ENSMUSG00000051048	2.35953	0.00067495	0.00641148	up	7:+:100285520-100319699	7:+:100285520-100319699	ENSMUSG00000051048	320452	H7BX23	P4ha3	prolyl 4-hydroxylase subunit alpha 3 [Source:HGNC Symbol;Acc:HGNC:30135]	10.2213	11.0146	8.05763	3.21685	3.12802	3.29526	0.86195	1.46832	0.38195	0.76016
ENSMUSG00000109904	-1.06936981239642	0.000672726	0.00639658	down	7:+:110119990-110121740	7:+:110119990-110121740	ENSMUSG00000109904	-	-	Gm45819	predicted gene 45819 [Source:MGI Symbol;Acc:MGI:5804934]	2.52318	1.38796	1.35987	2.86139	2.2333	2.51567	2.16648	4.7896	2.37546	3.29504
ENSMUSG00000022218	2.12844	0.000795613	0.00723837	up	14:-:55700009-55713926	14:-:55700009-55713926	ENSMUSG00000022218	21816	A0A0R4J293	Tgm1	transglutaminase 1, K polypeptide	0.43363	0.78462	0.36015	0.50786	0.93229	0.54728	0.14791	0.1396	0.01993	0.09917
ENSMUSG00000006241	1.20699	0.000827532	0.00744778	up	9:+:21927471-21935872	9:+:21927471-21935872	ENSMUSG00000006241	67119	Q8C963	Ccdc159	Coiled-coil domain-containing protein 159 [Source:UniProtKB/Swiss-Prot;Acc:Q8C963]	0.86072	1.1133	0.82993	0.73562	1.12992	0.84077	0.26185	0.4044	0.17322	0.28728
ENSMUSG00000035929	1.03373	0.000529929	0.0053278	up	17:+:35379617-35385290	17:+:35379617-35385290	ENSMUSG00000035929	15015	Q0WXH7	H2-Q4	histocompatibility 2, Q region locus 4	7.55089	8.73768	8.15537	12.545	14.994	9.91832	3.32293	4.95518	3.76285	2.80228
ENSMUSG00000052889	1.28854	0.000672058	0.00639437	up	7:+:122288751-122634402	7:+:122288751-122634402	ENSMUSG00000052889	18751	P68404	Prkcb	protein kinase C, beta [Source:MGI Symbol;Acc:MGI:97596]	1.25447	1.50883	1.39372	1.09982	2.48478	0.92529	0.23772	0.61813	0.36243	0.44262
ENSMUSG00000090122	-1.04037987650794	0.000383813	0.00417547	down	X:-:142304752-142306294	X:-:142304752-142306294	ENSMUSG00000090122	66240	Q9QZ26	Kcne1l	Potassium voltage-gated channel subfamily E regulatory beta subunit 5 [Source:UniProtKB/Swiss-Prot;Acc:Q9QZ26]	66.7119	49.8442	123.354	60.4046	54.2741	54.0031	143.268	82.1418	125.798	132.498
ENSMUSG00000044550	1.98064	0.000788595	0.0071924	up	X:+:136590842-136668378	X:+:136590842-136668378	ENSMUSG00000044550	594844	Q8R0A5	Tceal3	Mus musculus transcription elongation factor A (SII)-like 3 (Tceal3), transcript variant 2, mRNA. [Source:RefSeq mRNA;Acc:NM_001359277]	4.1388	2.37024	1.51817	1.24991	1.39121	3.25346	0.42499	0.60461	0.1955	0.3714
ENSMUSG00000050232	1.42454	0.000851281	0.00760311	up	X:-:101731535-101734269	X:-:101731535-101734269	ENSMUSG00000050232	12766	O88410	Cxcr3	C-X-C chemokine receptor type 3 [Source:UniProtKB/Swiss-Prot;Acc:O88410]	0.99746	0.78975	0.68779	0.8906	1.42497	1.18149	0.18012	0.21857	0.21845	0.39852
ENSMUSG00000038152	-1.01115490529429	0.000829968	0.00746513	down	13:+:45965253-45966508	13:+:45965253-45966508	ENSMUSG00000038152	76000	Q9D3Q2	5033430I15Rik	RIKEN cDNA 5033430I15 gene [Source:MGI Symbol;Acc:MGI:1923250]	1.33358	1.27643	1.25059	1.14704	1.89585	1.48726	1.80134	2.25204	2.11837	1.64688
ENSMUSG00000045761	1.196	0.000762891	0.00702801	up	17:+:71673261-71729669	17:+:71673261-71729669	ENSMUSG00000045761	320159	Q3TYG6	Togaram2	TOG array regulator of axonemal microtubules protein 2 [Source:UniProtKB/Swiss-Prot;Acc:Q3TYG6]	1.29124	1.38643	1.61071	1.07362	0.91997	0.80189	0.20328	0.33636	0.381	0.55755
ENSMUSG00000086298	-1.15088611457493	0.000657945	0.00629665	down	11:+:107338050-107344804	11:+:107338050-107344804	ENSMUSG00000086298	102640379	-	Gm11716	predicted gene 11716 [Source:MGI Symbol;Acc:MGI:3649215]	11.7773	11.3113	18.0622	7.1068	8.32022	9.0375	24.8773	15.4289	10.1907	18.1468
ENSMUSG00000107853	-1.47794210043733	0.000878662	0.00779157	down	6:-:47432126-47433089	6:-:47432126-47433089	ENSMUSG00000107853	100417389	-	Gm18584	predicted gene, 18584 [Source:MGI Symbol;Acc:MGI:5010769]	0.89554	0.4727	0.42957	0.86623	0.62408	0.59838	1.13204	1.70071	1.63438	0.78066
[truncated: 647 more rows]
